# Supplementary material
Source: PubMed Central journal article supplement (PMC8364506)

## Supporting Information

### **Synthesis and Antibacterial Activity of Propylamycin Derivatives Functionalized at the 5''- and Other Positions with a View to Overcoming Resistance due to Aminoglycoside Modifying Enzymes.**

Dimitrijs Lubriks,<sup>a</sup> Rimants Zogota,<sup>a</sup> Vikram A Sarpe,<sup>b,c</sup> Takahiko Matsushita,<sup>d</sup> Girish C. Sati,<sup>d</sup> Klara Haldimann,<sup>e</sup> Marina Gysin,<sup>e</sup> Erik C. Böttger,<sup>e</sup> Andrea Vasella,<sup>f</sup> Edgars Suna,<sup>a,\*</sup> Sven N. Hobbie,<sup>e,\*</sup> and David Crich.<sup>b,c,d,g,\*</sup>

- a) Latvian Institute of Organic Synthesis, Riga, Latvia, LV-1006
- b) Department of Pharmaceutical and Biomedical Sciences, University of Georgia, 250 West Green Street, Athens, GA 30602, USA
- c) Complex Carbohydrate Research Center, University of Georgia, 315 Riverbend Road, Athens, GA 30602, USA
- d) Department of Chemistry, Wayne State University, 5101 Cass Avenue, Detroit, MI 48202, USA
- e) Institute of Medical Microbiology, University of Zurich, Gloriastrasse 28, 8006 Zürich, Switzerland
- f) Organic Chemistry Laboratory, ETH Zürich, Vladimir-Prelog-Weg 1-5/10, 8093 Zürich, Switzerland
- g) Department of Chemistry, University of Georgia, 140 Cedar Street, Athens, GA 30602, USA

\* [Edgars@osi.lv](mailto:Edgars@osi.lv)

\* [Shobbie@imm.uzh.ch](mailto:Shobbie@imm.uzh.ch)

\* [David.crich@uga.edu](mailto:David.crich@uga.edu)

Table of Contents

|                                                                                                                                                                            | Expt | Spectra  |
|----------------------------------------------------------------------------------------------------------------------------------------------------------------------------|------|----------|
| <b>General Experimental.</b>                                                                                                                                               | S5   | ----     |
| <b>5''-O-tert-Butyldimethylsilyl-4',6'-O-benzylidene-1,3,2',2''',6'''-penta-N-trifluoroacetyl paromomycin (17).</b>                                                        | S5   | S48-S50  |
| <b>6,3',2'',3''',4'''-Penta-O-benzoyl-5''-O-tert-butylidimethylsilyl-4',6'-O-benzylidene-1,3,2',2''',6'''-penta-N-trifluoroacetyl paromomycin (18)</b>                     | S6   | S51-S53  |
| <b>6,3',2'',3''',4'''-Penta-O-benzoyl-4',6'-O-benzylidene-1,3,2',2''',6'''-penta-N-trifluoroacetyl paromomycin (19).</b>                                                   | S7   | S54-S56  |
| <b>5''-Deoxy-5''-azido-6,3',2'',3''',4'''-penta-O-benzoyl-4',6'-O-benzylidene-1,3,2',2''',6'''-penta-N-trifluoroacetyl paromomycin (20).</b>                               | S8   | S57-S59  |
| <b>5''-Deoxy-5''-amino-6,3',2'',3''',4'''-penta-O-benzoyl-4',6'-O-benzylidene-1,3,2',2''',6'''-penta-N-trifluoroacetyl paromomycin (21).</b>                               | S10  | S60-S62  |
| <b>5''-Deoxy-5''-(O-benzylcarbamoyl)-6,3',2'',3''',4'''-penta-O-benzoyl-4',6'-O-benzylidene-1,3,2',2''',6'''-penta-N-trifluoroacetyl paromomycin (22).</b>                 | S11  | S63-S65  |
| <b>5''-Deoxy-5''-(O-benzylcarbamoyl)-6,3',2'',3''',4'''-penta-O-benzoyl-1,3,2',2''',6'''-penta-N-trifluoroacetyl paromomycin (23).</b>                                     | S12  | S66-S68  |
| <b>5''-Deoxy-5''-(O-benzylcarbamoyl)-6,3',6',2'',3''',4'''-hexa-O-benzoyl-1,3,2',2''',6'''-penta-N-trifluoroacetyl paromomycin (24).</b>                                   | S13  | S69-S76  |
| <b>4',5''-Dideoxy-5''-(O-benzylcarbamoyl)-6,3',6',2'',3''',4'''-hexa-O-benzoyl-4'-iodo-1,3,2',2''',6'''-penta-N-trifluoroacetyl 4'-<i>epi</i>-paromomycin (25).</b>        | S14  | S77-S84  |
| <b>4'-Allyl-4',5''-dideoxy-5''-(O-benzylcarbamoyl)-6,3',6',2'',3''',4'''-hexa-O-benzoyl-1,3,2',2''',6'''-penta-N-trifluoroacetyl paromomycin (26) by allylation of 25.</b> | S15  | S85-S89  |
| <b>General Procedure A for the photochemically initiated radical allylation of iodo paromomycin derivatives 25 and 29</b>                                                  | S17  | ---      |
| <b>4',5''-Dideoxy-5''-(O-benzylcarbamoyl)-6,3',6',2'',3''',4'''-hexa-O-benzoyl-1,3,2',2''',6'''-penta-N-trifluoroacetyl paromomycin-4'-ene (27).</b>                       | S17  | S90-S94  |
| <b>5''-Deoxy-5''-(O-benzylcarbamoyl)-6,3',6',2'',3''',4'''-hexa-O-benzoyl-1,3,2',2''',6'''-penta-N-trifluoroacetyl 4'-<i>epi</i>-paromomycin (28).</b>                     | S18  | S95-S102 |

|                                                                                                                                                                                                  |     |           |
|--------------------------------------------------------------------------------------------------------------------------------------------------------------------------------------------------|-----|-----------|
| 4',5''-Dideoxy-5''-( <i>O</i> -benzylcarbamoyl)-6,3',6',2'',3''',4''''-hexa- <i>O</i> -benzoyl-4'-iodo-1,3,2',2''',6''''-penta- <i>N</i> -trifluoroacetyl paromomycin (29).                      | S19 | S103-S110 |
| 4'-Allyl-4',5''-dideoxy-5''-( <i>O</i> -benzylcarbamoyl)-6,3',6',2'',3''',4''''-hexa- <i>O</i> -benzoyl-1,3,2',2''',6''''-penta- <i>N</i> -trifluoroacetyl paromomycin (26) by allylation of 29. | S20 | ---       |
| 4',5''-Dideoxy-5''-( <i>O</i> -benzylcarbamoyl)-6,3',6',2'',3''',4''''-hexa- <i>O</i> -benzoyl-1,3,2',2''',6''''-penta- <i>N</i> -trifluoroacetyl paromomycin (30-H).                            | S21 | S111-S115 |
| 4',5''-Dideoxy-4'-propyl-5''-amino-6,3',6',2'',3''',4''''-hexa- <i>O</i> -benzoyl-1,3,2',2''',6''''-penta- <i>N</i> -trifluoroacetyl paromomycin (31).                                           | S21 | S116-S118 |
| 2,2,2-Trifluoro- <i>N</i> -(2-hydroxyethyl)acetamide (S1).                                                                                                                                       | S22 | S119      |
| 2,2,2-Trifluoro- <i>N</i> -(2-oxoethyl)acetamide (32).                                                                                                                                           | S23 | S120      |
| 2,2,2-Trifluoro- <i>N</i> -(3-oxopropyl)acetamide (33).                                                                                                                                          | S23 | S121      |
| General Procedure B for reductive amination of amine 31 with aldehydes 32 and 33.                                                                                                                | S24 | ---       |
| 4',5''-Dideoxy-4'-propyl-5''-(2-trifluoroacetamidoethylamino)-6,3',6',2'',3''',4''''-hexa- <i>O</i> -benzoyl-1,3,2',2''',6''''-penta- <i>N</i> -trifluoroacetyl paromomycin (34).                | S24 | ---       |
| 4',5''-Dideoxy-4'-propyl-5''-(3-trifluoroacetamidopropylamino)-6,3',6',2'',3''',4''''-hexa- <i>O</i> -benzoyl-1,3,2',2''',6''''-penta- <i>N</i> -trifluoroacetyl paromomycin (35).               | S24 | ---       |
| General Procedure C for trifluoroacetylation of amines 34 and 35.                                                                                                                                | S25 | ---       |
| 4',5''-Dideoxy-4'-propyl-5''-(2-aminoethylamino)-6,3',6',2'',3''',4''''-hexa- <i>O</i> -benzoyl-hepta- <i>N</i> -trifluoroacetyl paromomycin (36).                                               | S25 | S122-S124 |
| 4',5''-Dideoxy-4'-propyl-5''-(3-aminoethylamino)-6,3',6',2'',3''',4''''-hexa- <i>O</i> -benzoyl-hepta- <i>N</i> -trifluoroacetyl paromomycin (37).                                               | S26 | S125-S127 |
| 4',5''-Dideoxy-4'-propyl-5''-( <i>O</i> -benzylcarbamoyl)-6,3',6',2'',3''',4''''-hexa- <i>O</i> -benzoyl-1,3,2',2''',6''''-penta- <i>N</i> -trifluoroacetyl paromomycin (38).                    | S27 | S128-S133 |
| 4',5''-Dideoxy-4'-propyl-5''-formamido-6,3',6',2'',3''',4''''-hexa- <i>O</i> -benzoyl-1,3,2',2''',6''''-penta- <i>N</i> -trifluoroacetyl paromomycin (39).                                       | S28 | S134-S139 |
| 4',5''-Dideoxy-4'-propyl-5''-( <i>N</i> -benzylureido)-6,3',6',2'',3''',4''''-hexa- <i>O</i> -benzoyl-1,3,2',2''',6''''-penta- <i>N</i> -trifluoroacetyl paromomycin (40).                       | S29 | S140-S145 |

|                                                                                                                                                                    |     |           |
|--------------------------------------------------------------------------------------------------------------------------------------------------------------------|-----|-----------|
| <b>4',5''-Dideoxy-4'-propyl-5''-(N-trifluoroacetylglycinamido)-6,3',6',2'',3''',4'''-hexa-O-benzoyl-1,3,2',2''',6'''-penta-N-trifluoroacetyl paromomycin (41).</b> | S30 | S146-S150 |
| <b>General Procedure D for global deprotection of trifluoroacetamides 36, 37, 39 and 41.</b>                                                                       | S31 | ---       |
| <b>General Procedure E for global deprotection of trifluoroacetamides 38 and 40.</b>                                                                               | S32 | ---       |
| <b>5''-Amino-4',5''-dideoxy-4'-propyl paromomycin pentaacetate (8).</b>                                                                                            | S33 | S151-S154 |
| <b>5''-(2-Aminoethylamino)-4',5''-dideoxy-4'-propyl paromomycin heptaacetate (9).</b>                                                                              | S33 | S155-S159 |
| <b>5''-(3-Aminopropylamino)-4',5''-dideoxy-4'-propyl paromomycin heptaacetate (10).</b>                                                                            | S34 | S160-S164 |
| <b>4',5''-Dideoxy-5''-formamido-4'-propyl paromomycin pentaacetate (11).</b>                                                                                       | S35 | S165-S168 |
| <b>4',5''-Dideoxy-4'-propyl-5''-ureido-paromomycin pentaacetate (12).</b>                                                                                          | S36 | S169-S172 |
| <b>4',5''-Dideoxy-5''-glycinamido-4'-propyl paromomycin hexacetate (13).</b>                                                                                       | S36 | S173-S176 |
| <b>Phenyl 2-azido-2,3,4-trideoxy-4-C-ethyl-1-thio-β-D-glucopyranoside (43).</b>                                                                                    | S37 | S177-S178 |
| <b>Phenyl 6-O-acetyl-2-azido-2,3,4-trideoxy-4-C-ethyl-1-thio-β-D-glucopyranoside (44).</b>                                                                         | S38 | S179-S181 |
| <b>Phenyl 6-O-acetyl-2-azido-2,3,4-trideoxy-4-C-ethyl-1-thio-β-D-glucopyranosyl sulfoxide (45).</b>                                                                | S39 | S182-S184 |
| <b>1,3,2',3',4',2''',6'''-Heptadeoxy-4'-propyl-6'-acetyl-1,3,2',2''',6'''-pentaazido-6,2'',5'',3''',4'''-penta-O-benzyl paromomycin (47).</b>                      | S40 | S185-S190 |
| <b>3',4'-Dideoxy-4'-propyl paromomycin pentaacetate (14).</b>                                                                                                      | S41 | S191-S196 |
| <b>1,3,2',2''',6'''-Penta-N-benzyloxycarbonyl paromomycin (48).</b>                                                                                                | S41 | ---       |
| <b>6',5''-Bis-O-(2,4,6-triisopropylbenzenesulfonyl)-1,3,2',2''',6'''-penta-N-benzyloxycarbonyl paromomycin (49).</b>                                               | S42 | ---       |
| <b>6',5''-Dideoxy-bis-N-(2-hydroxyethyl)-1,3,2',2''',6'''-penta-N-benzyloxycarbonyl paromomycin (50).</b>                                                          | S43 | ---       |
| <b>4',6',5''-Trideoxy-6',5''-[bis-N-(2-hydroxyethyl)]-4'-propyl paromomycin heptaacetate (15).</b>                                                                 | S43 | S197-S202 |
| <b>Table S1. Bacterial strains used in this study</b>                                                                                                              | S44 | ---       |
| <b>Cell-free translation inhibition graphs</b>                                                                                                                     | S45 | ---       |
| <b>References</b>                                                                                                                                                  | S47 | ---       |

## General Experimental

All experiments were carried out under a dry argon atmosphere unless otherwise specified. All reagents and solvents were purchased from commercial suppliers and were used without further purification unless otherwise specified. Chromatographic purifications were carried over silica gel (230-400 mesh). Thin layer chromatography was performed with precoated glass backed plates (w/UV 254). TLC plates were visualized by UV irradiation (254 nm) and by charring with sulfuric acid in ethanol (20:80, v/v) or with ceric ammonium molybdate solution [Ce(SO<sub>4</sub>)<sub>2</sub>: 4 g, (NH<sub>4</sub>)<sub>6</sub>Mo<sub>7</sub>O<sub>24</sub>: 10 g, H<sub>2</sub>SO<sub>4</sub>: 40 mL, H<sub>2</sub>O: 360 mL]. Optical rotations were measured at 589 nm and 21 °C on a digital polarimeter with a path length of 10 cm. <sup>1</sup>H and <sup>13</sup>C NMR spectra of all compounds were recorded using at 600 MHz unless otherwise specified and assignments made with the help of COSY, HMBC, and HSQC spectra. ESIHRMS were recorded using a time-of-flight mass spectrometer fitted with an electrospray source.

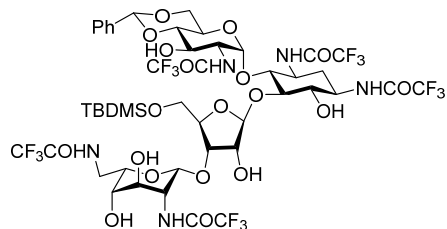

**5''-O-tert-Butyldimethylsilyl-4',6'-O-benzylidene-1,3,2',2''',6'''-penta-N-trifluoroacetyl paromomycin (17).** An oven-dried 500 mL round-bottom flask was cooled under a stream of argon, equipped with a stirring bar and charged with 4',6'-O-benzylidene-penta-N-trifluoroacetyl paromomycin **16** (52.6 g, 44.4 mmol, 1.0 equiv), followed by anhydrous DMF (150 mL). Imidazole (7.56 g, 111 mmol, 2.5 equiv) was added to the stirred solution at ambient temperature, after which a solution of *tert*-butyldimethylsilyl chloride (10.4 g, 68.8 mmol, 1.5 equiv) in anhydrous DMF (50 mL) was added dropwise over a period of 15 min. After stirring at ambient temperature for 3 h (the reaction progress was monitored by UPLC-MS assay), water (800 mL) was added to the light yellowish solution and product was back-extracted with EtOAc (3×400 mL). The combined organic extracts were washed with aqueous HCl (0.1 M solution in water, 400 mL), water (400 mL), saturated aqueous NaHCO<sub>3</sub> solution (400 mL), then water (400 mL) and, finally brine (300 mL). After drying over anhydrous Na<sub>2</sub>SO<sub>4</sub>, all volatiles were removed under reduced pressure. The yellow residue was taken up in EtOAc (100 mL) and the solution was slowly poured over 20 min to the stirred hexane (2.0 L) to give a precipitate that was collected by suction filtration. The obtained white powder of **17** (54.9 g, 95 % yield) was dried under reduced pressure and used in subsequent step without further purification.  $[\alpha]_D^{23} +9.2$  (c 1.08, MeOH).

<sup>1</sup>H NMR (400 MHz, CD<sub>3</sub>CN) δ: 8.01 (d, *J* = 9.0 Hz, 1H), 7.81 (d, *J* = 9.2 Hz, 1H), 7.66 (d, *J* = 9.0 Hz, 2H), 7.52 – 7.43 (m, 3H), 7.41 – 7.35 (m, 3H), 5.55 (s, 1H), 5.47 (d, *J* = 3.8 Hz, 1H), 5.05 (d, *J* = 1.9 Hz, 1H), 5.00 (d, *J* = 5.4 Hz, 1H), 4.34 (d, *J* = 3.0 Hz, 1H), 4.24 – 4.11 (m, 4H), 4.08 – 3.97 (m, 5H), 3.92 – 3.81 (m, 3H), 3.76 – 3.62 (m, 8H), 3.59 – 3.39 (m, 6H), 2.01 (dt, *J* = 12.9, 4.6 Hz, 1H), 1.64 (q, *J* = 12.9 Hz, 1H), 0.90 (s, 9H), 0.08 (s, 3H), 0.07 (s, 3H) ppm.

<sup>13</sup>C{<sup>1</sup>H} NMR (101 MHz, CD<sub>3</sub>CN) δ: 158.1 – 157.4 (5×COCF<sub>3</sub>), 138.9, 130.0, 129.2, 129.1, 127.4, 126.3, 115.8 – 115.5 (5×CF<sub>3</sub>), 110.4, 102.5, 99.7, 98.2, 86.7, 84.5, 82.3, 79.4, 75.5, 74.1, 72.3, 69.7, 69.1, 68.6, 68.5, 64.6, 63.9, 55.8, 52.3, 50.7, 50.2, 41.3, 32.6, 26.3, 18.9, -5.3, -5.4 ppm.

HRMS (ESI/Q-TOF): *m/z* [M+Na]<sup>+</sup> Calcd for C<sub>46</sub>H<sub>58</sub>N<sub>5</sub>O<sub>19</sub>F<sub>15</sub>NaSi 1320.3153; Found 1320.3129.

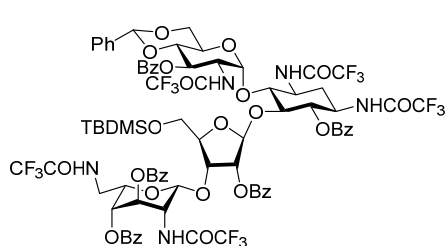

**6,3',2'',3''',4''''-Penta-*O*-benzoyl-5''-*O*-*tert*-butyldimethylsilyl-4',6'-*O*-benzylidene-1,3,2',2''',6''''-penta-*N*-trifluoroacetyl paromomycin (18).**

To a stirred solution of 5''-*O*-TBDMS paromomycin derivative **17** (54.9 g, 42.3 mmol, 1.0 equiv) in anhydrous pyridine (500 mL) at 0 °C (crushed ice bath) was added DMAP (1.03 g, 8.46 mmol, 0.2 equiv), followed by benzoic anhydride (57.4 g, 254 mmol, 6.0 equiv). The resulting pale yellow solution was heated up to 70 °C and stirred for 40 h, and the reaction progress was monitored by UPLC-MS assay. The resulting dark red suspension was cooled to room temperature, concentrated under reduced pressure and additionally co-evaporated twice with toluene (2×200 mL). The brown oily residue was dissolved in EtOAc (600 mL) and washed with water (400 mL). The aqueous layer was back-extracted with EtOAc (2×200 mL). The combined organic extracts were washed with aqueous HCl (0.1 M solution in water, 200 mL), water (200 mL), saturated aqueous NaHCO<sub>3</sub> solution (400 mL), then water (400 mL) and, finally brine (400 mL). Drying over anhydrous Na<sub>2</sub>SO<sub>4</sub>, filtration and concentration to dryness under reduced pressure afforded brown oil that was filtered through a silica gel pad using gradient elution from 10 % EtOAc in petroleum ether to 50 % EtOAc in petroleum ether. Fractions containing the product (identified by TLC and ESI-MS), were combined and concentrated under reduced pressure. The yellow residue was taken up in DCM (100 mL) and the solution was slowly (within 20 min) poured into well-stirred hexane (2.0 L) to give a precipitate that was collected by suction filtration. The obtained white powder of **18** (70.4 g, 92 % yield) was dried under reduced pressure and used in subsequent step without further purification. An aliquot of **18** (200 mg) was purified by silica gel column chromatography using

gradient elution from 25 % EtOAc in hexane to 50 % EtOAc in hexane; analytical TLC on silica gel, 1:2 EtOAc/petroleum ether,  $R_f=0.40$ ;  $[\alpha]_D^{23} +20.9$  (c 0.96, MeOH).

**$^1\text{H}$  NMR** (600 MHz,  $\text{CD}_3\text{OD}$ )  $\delta$ : 8.12-8.08 (m, 2H), 8.03-7.99 (m, 2H), 7.97-7.94 (m, 2H), 7.77-7.73 (m, 1H), 7.73 – 7.70 (m, 2H), 7.65 – 7.56 (m, 4H), 7.51 – 7.43 (m, 4H), 7.42 – 7.38 (m, 4H), 7.31 – 7.27 (m, 4H), 7.18 – 7.11 (m, 2H), 7.09-7.05 (m, 1H), 6.99 – 6.90 (m, 2H), 6.19 (d,  $J = 4.2$  Hz, 1H), 5.60 – 5.53 (m, 2H), 5.34-5.31 (m, 1H), 5.27 (dd,  $J = 10.6, 9.3$  Hz, 1H), 5.11 (dd,  $J = 4.4, 1.6$  Hz, 1H), 5.03 (d,  $J = 1.6$  Hz, 1H), 5.01 (t,  $J = 3.1$  Hz, 1H), 4.65 (dd,  $J = 10.6, 4.2$  Hz, 1H), 4.55 (dd,  $J = 6.9, 4.2$  Hz, 1H), 4.38 – 4.28 (m, 4H), 4.19-4.15 (m, 1H), 4.04 (dd,  $J = 10.3, 8.3$  Hz, 1H), 3.99 – 3.93 (m, 2H), 3.91 – 3.84 (m, 2H), 3.81 (d,  $J = 10.3$  Hz, 1H), 3.79 – 3.74 (m, 2H), 3.65-3.61 (m, 2H), 3.58 (dd,  $J = 11.8, 2.3$  Hz, 1H), 2.12 (q,  $J = 12.9$  Hz, 1H), 1.99 (t,  $J = 4.4$  Hz, 1H), 1.03 (s, 9H), 0.20 (s, 3H), 0.17 (s, 3H) ppm, 5H exchangeable protons merge with  $\text{H}_2\text{O}$ .

**$^{13}\text{C}\{^1\text{H}\}$  NMR** (151 MHz,  $\text{CD}_3\text{OD}$ )  $\delta$ : 168.6, 167.4, 167.3, 166.3, 165.9, 159.6 – 157.4 ( $5\times\text{COCF}_3$ ), 138.8, 134.9, 134.4, 134.2, 134.1, 131.4, 131.1, 130.9, 130.8, 130.7, 130.7, 130.6, 130.5, 130.4, 130.0, 129.8, 129.6, 129.5, 129.3, 129.0, 128.9, 127.5, 117.7 – 116.5 ( $5\times\text{CF}_3$ ), 110.6, 103.2, 98.4, 97.7, 86.7, 83.7, 80.7, 77.8, 77.3, 77.1, 77.0, 76.0, 74.4, 73.8, 72.1, 71.8, 69.4, 67.7, 66.0, 64.6, 62.0, 61.5, 53.3, 50.5, 49.7, 49.5, 41.5, 32.2, 27.0, 19.7, -4.9, -5.3 ppm.

**HRMS** (ESI/Q-TOF):  $m/z$   $[\text{M}+\text{Na}]^+$  Calcd for  $\text{C}_{81}\text{H}_{78}\text{N}_5\text{O}_{24}\text{F}_{15}\text{NaSi}$  1840.4464; Found 1840.4443.

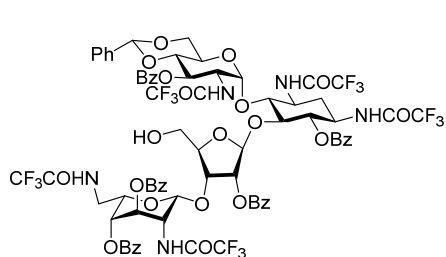

**6,3',2'',3''',4'''-Penta-O-benzoyl-4',6'-O-benzylidene-**

**1,3,2',2''',6'''-penta-N-trifluoroacetyl paromomycin (19).** To a

stirred solution of penta-O-benzoyl paromomycin derivative **18** (70.4 g, 38.7 mmol, 1.0 equiv) in anhydrous THF (350 mL) was dropwise added TBAF (1.0 M solution in THF; 50.3 mL, 50.3 mmol,

1.3 equiv) over 20 min period. Upon completion of the addition, color of the solution changed from light yellow to light brownish. The solution was stirred at ambient temperature for 20 h, and the reaction progress was monitored by UPLC-MS assay. The resulting brown reaction mixture was quenched with saturated aqueous  $\text{NH}_4\text{Cl}$  solution (150 mL), whereupon color changed to orange. The obtained orange suspension was evaporated to dryness under reduced pressure. Water (300 mL) was added to the residue and the solution was back-extracted with EtOAc ( $3\times 400$  mL). Combined organic layers were washed with brine ( $2\times 400$  mL), dried over anhydrous  $\text{Na}_2\text{SO}_4$ , filtered and concentrated to dryness under reduced pressure. The yellow residue was taken up in EtOAc (120 mL) and the solution was slowly (over 20 min)

poured into well-stirred hexane (2.0 L) to give a precipitate that was collected by suction filtration. The obtained white powder of **19** (66.0 g, 100 % yield) was dried under reduced pressure and used in subsequent step without further purification. An aliquot of **7** (200 mg) was purified by reversed-phase preparative HPLC (XBridge® Prep C18 OBD™ column) using gradient elution from 5 % to 95 % MeCN in 0.1 % aqueous AcOH; analytical TLC on silica gel, 1:2 EtOAc/petroleum ether,  $R_f=0.21$ .  $[\alpha]_D^{23} +17.8$  ( $c$  1.07, MeOH).

**<sup>1</sup>H NMR** (600 MHz, CD<sub>3</sub>OD)  $\delta$ : 8.27 (dd,  $J = 8.4, 1.4$  Hz, 2H), 8.11 (dd,  $J = 8.4, 1.4$  Hz, 2H), 7.97 (dd,  $J = 8.4, 1.4$  Hz, 2H), 7.80 – 7.76 (m, 1H), 7.74 – 7.72 (m, 2H), 7.71 – 7.67 (m, 2H), 7.65 – 7.62 (m, 1H), 7.60 – 7.56 (m, 1H), 7.49 – 7.47 (m, 2H), 7.47 – 7.43 (m, 3H), 7.42 – 7.38 (m, 4H), 7.32 – 7.28 (m, 3H), 7.24 – 7.20 (m, 2H), 7.00 – 6.94 (m, 1H), 6.91 (dd,  $J = 8.4, 6.8$  Hz, 2H), 6.21 (d,  $J = 4.1$  Hz, 1H), 5.62 – 5.56 (m, 2H), 5.36 (s, 1H), 5.33 – 5.29 (m, 1H), 5.29 – 5.26 (m, 2H), 5.24 – 5.22 (m, 1H), 5.08 (d,  $J = 4.4$  Hz, 1H), 4.73 (dd,  $J = 10.6, 4.1$  Hz, 1H), 4.51 (dd,  $J = 8.4, 4.4$  Hz, 1H), 4.45 (ddd,  $J = 8.9, 4.4, 2.0$  Hz, 1H), 4.40 – 4.29 (m, 4H), 4.08 (dd,  $J = 10.3, 8.4$  Hz, 1H), 4.01 – 3.93 (m, 3H), 3.91 – 3.84 (m, 2H), 3.83 – 3.79 (m, 1H), 3.75 – 3.67 (m, 2H), 3.54 (dd,  $J = 14.0, 4.4$  Hz, 1H), 2.17 (q,  $J = 12.9$  Hz, 1H), 2.03 (dt,  $J = 12.9, 4.4$  Hz, 1H) ppm, 6H exchangeable protons merge with H<sub>2</sub>O.

**<sup>13</sup>C{<sup>1</sup>H} NMR** (151 MHz, CD<sub>3</sub>OD)  $\delta$ : 167.3, 167.2, 166.5, 166.1, 165.7, 160.0 – 158.3 (5×COCF<sub>3</sub>), 138.9, 135.0, 135.0, 134.4, 134.4, 134.3, 131.3, 131.0, 130.9, 130.8, 130.7, 130.6, 130.5, 130.0, 129.9, 129.9, 129.7, 129.5, 129.3, 129.2, 129.1, 129.0, 127.5, 118.5 – 115.9 (5×CF<sub>3</sub>), 110.3, 103.1, 98.4, 97.8, 86.8, 82.4, 80.5, 77.4, 77.2, 76.6, 75.7, 74.5, 71.7, 69.8, 69.4, 67.9, 64.7, 61.7, 53.3, 50.5, 50.1, 49.6, 49.5, 40.8, 32.1 ppm.

**HRMS** (ESI/Q-TOF):  $m/z$  [M+Na]<sup>+</sup> Calcd for C<sub>75</sub>H<sub>64</sub>N<sub>5</sub>O<sub>24</sub>F<sub>15</sub>Na 1726.3599; Found 1726.3567.

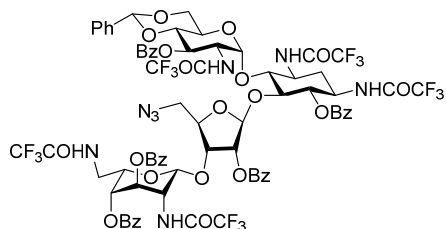

**5''-Deoxy-5''-azido-6,3',2'',3''',4''''-penta-O-benzoyl-4',6'-O-benzylidene-1,3,2',2''',6'''-penta-N-trifluoroacetyl paromomycin (**20**)**. A stirred solution of 5''-hydroxy paromomycin derivative **19** (40.0 g, 23.5 mmol, 1.0 equiv) in anhydrous DCM (500 mL) was cooled to -10 °C (crushed ice/NaCl bath) and treated with 2,6-lutidine (13.6 mL, 117 mmol, 5.0 equiv). Trifluoromethanesulfonic anhydride (11.8 mL, 70.4 mmol, 3.0 equiv) was then added dropwise at -10 °C over a period of 20 min. Upon completion of the addition the yellow solution turned brown and was stirred at -10 °C for 1 h. The resulting mixture was washed with



water (300 mL) and organic layer was back-extracted with DCM (2×300 mL). Combined organic layers were dried over anhydrous Na<sub>2</sub>SO<sub>4</sub>, filtered and concentrated to dryness under reduced pressure. The residual brownish oil was dissolved in MeCN (200 mL) and sodium azide (7.79 g, 120 mmol, 5.0 equiv) was added, followed by 18-crown-6 (3.17 g, 12.0 mmol, 0.5 equiv). The resulting suspension was stirred at ambient temperature for 3 h, and the reaction progress was monitored by UPLC-MS assay. The obtained orange suspension was concentrated under the reduced pressure, and the residue was partitioned between EtOAc (300 mL) and water (400 mL). The aqueous layer was back-extracted with EtOAc (2×300 mL) and combined organic extracts were washed with brine (2×200 mL), dried over anhydrous Na<sub>2</sub>SO<sub>4</sub>, filtered and concentrated to dryness under reduced pressure. The crude product was purified by silica gel column chromatography using gradient elution from 20 % EtOAc in petroleum ether to 100 % EtOAc. Fractions containing the product (detected by TLC and ESI-MS) were combined and concentrated under reduced pressure. The yellow oily residue was taken up in DCM (30 mL) and the solution was slowly (over 20 min) poured into well-stirred hexane (1.0 L) to give a precipitate that was collected by suction filtration. The obtained pale yellow powder of **20** (31.7 g, 77 % yield) was dried under reduced pressure and used in subsequent step. An aliquot of **20** (200 mg) was purified by reversed-phase preparative HPLC (XBridge® Prep C18 OBD™ column) using gradient elution from 5 % to 95 % MeCN in 0.1 % aqueous AcOH solution; analytical TLC on silica gel, 1:2 EtOAc/petroleum ether, *R<sub>f</sub>*=0.30.  $[\alpha]_D^{23} +41.9$  (c 1.17, MeOH).

**<sup>1</sup>H NMR** (600 MHz, CD<sub>3</sub>OD)  $\delta$ : 8.29 (dd, *J* = 8.4, 1.4 Hz, 2H), 8.11 (dd, *J* = 8.4, 1.4 Hz, 2H), 7.98 (dd, *J* = 8.4, 1.4 Hz, 2H), 7.81 – 7.78 (m, 1H), 7.74 – 7.68 (m, 4H), 7.66 – 7.62 (m, 1H), 7.60 – 7.57 (m, 1H), 7.50 – 7.47 (m, 2H), 7.47 – 7.42 (m, 3H), 7.41 – 7.37 (m, 4H), 7.31 – 7.27 (m, 3H), 7.24 – 7.19 (m, 2H), 6.97 – 6.92 (m, 1H), 6.91 – 6.86 (m, 2H), 6.30 (d, *J* = 4.1 Hz, 1H), 5.63 – 5.55 (m, 2H), 5.36 (s, 1H), 5.32 – 5.30 (m, 1H), 5.29 – 5.26 (m, 2H), 5.25 – 5.21 (m, 1H), 5.06 (d, *J* = 4.4 Hz, 1H), 4.69 (dd, *J* = 10.6, 4.1 Hz, 1H), 4.53 (dd, *J* = 8.6, 4.4 Hz, 1H), 4.49 (ddd, *J* = 9.3, 4.4, 1.9 Hz, 1H), 4.42 – 4.27 (m, 4H), 4.10 (dd, *J* = 10.3, 8.4 Hz, 1H), 3.98 (td, *J* = 9.7, 4.7 Hz, 1H), 3.95 (d, *J* = 9.3 Hz, 1H), 3.93 – 3.88 (m, 2H), 3.88 – 3.82 (m, 2H), 3.80 (dt, *J* = 8.6, 2.6 Hz, 1H), 3.67 (dd, *J* = 13.5, 2.6 Hz, 1H), 3.43 (dd, *J* = 14.1, 4.4 Hz, 1H), 2.18 (q, *J* = 12.9 Hz, 1H), 2.04 (dt, *J* = 12.9, 4.4 Hz, 1H) ppm, 5H exchangeable protons merge with H<sub>2</sub>O.

**<sup>13</sup>C{<sup>1</sup>H} NMR** (151 MHz, CD<sub>3</sub>OD)  $\delta$ : 167.3, 167.2, 166.5, 166.0, 165.7, 159.8 – 158.4 (5×COCF<sub>3</sub>), 138.8, 135.0, 135.0, 134.4, 134.4, 134.3, 131.3, 131.0, 130.9, 130.8, 130.7, 130.6, 130.5, 130.0, 129.9, 129.9, 129.7, 129.5, 129.4, 129.2, 129.1, 129.0, 127.5, 118.7 – 115.7 (5×CF<sub>3</sub>), 110.6, 103.1, 98.3, 98.0, 87.1, 80.8, 79.5, 77.3, 77.1, 76.4, 75.1, 74.3, 71.6, 69.8, 69.5, 67.8, 64.8, 53.3, 50.6, 50.4, 50.1, 49.6, 49.5, 40.7, 32.1 ppm.

HRMS (ESI/Q-TOF):  $m/z$   $[M+Na]^+$  Calcd for  $C_{75}H_{63}N_8O_{23}F_{15}Na$  1751.3664; Found 1751.3624.

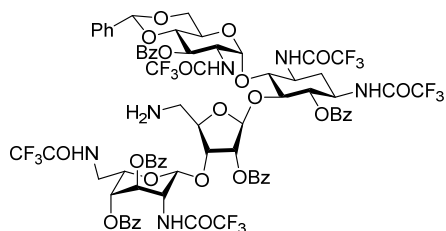

**5''-Deoxy-5''-amino-6,3',2'',3''',4'''-penta-O-benzoyl-4',6'-O-benzylidene-1,3,2',2''',6'''-penta-N-trifluoroacetyl paromomycin**

**(21)**. To a stirred solution of 5''-deoxy-5''-azido paromomycin derivative **20** (31.7 g, 18.3 mmol, 1.0 equiv) in a mixture of degassed THF (300 mL, bubbling a vigorously stirred THF with

argon for 15 min) and water (206 mL) was dropwise added  $PMe_3$  (1.0 M solution in THF; 18.3 mL, 18.3 mmol, 1.0 equiv) over 20 min at 0 °C (crushed ice bath). After stirring at ambient temperature for 10 h (the reaction progress was monitored by UPLC-MS assay), the yellowish mixture was concentrated to dryness under reduced pressure. The crude product was purified by silica gel column chromatography using gradient elution from 25 % EtOAc in hexane to 100 % EtOAc. Fractions containing the product (detected by TLC and ESI-MS) were combined and concentrated under reduced pressure to give product **21** (12.6 g, 40 % yield) as a white powder. An aliquot of **21** (100 mg) was purified by reversed-phase preparative HPLC (XBridge® Prep C18 OBD™ column) using gradient elution from 10 % to 90 % MeCN in 0.1 % aqueous AcOH solution; analytical TLC on silica gel, 1:1 EtOAc/petroleum ether,  $R_f=0.22$ ;  $[\alpha]_D^{23} +18.0$  (c 1.00, MeOH).

**$^1H$  NMR** (600 MHz,  $CD_3OD$ )  $\delta$ : 8.35 – 8.30 (m, 2H), 8.14 (dd,  $J = 8.4, 1.4$  Hz, 2H), 7.97 (dd,  $J = 8.4, 1.4$  Hz, 2H), 7.83 – 7.78 (m, 1H), 7.75 – 7.72 (m, 2H), 7.72 – 7.69 (m, 2H), 7.67 – 7.65 (m, 1H), 7.62 – 7.58 (m, 1H), 7.52 – 7.48 (m, 2H), 7.48 – 7.42 (m, 4H), 7.42 – 7.38 (m, 3H), 7.32 – 7.28 (m, 3H), 7.23 (dd,  $J = 8.4, 7.4$  Hz, 2H), 6.97 – 6.92 (m, 1H), 6.89 (dd,  $J = 8.4, 6.7$  Hz, 2H), 5.99 (d,  $J = 4.2$  Hz, 1H), 5.64 – 5.58 (m, 2H), 5.40 (s, 1H), 5.35 – 5.32 (m, 1H), 5.30 (t,  $J = 2.9$  Hz, 1H), 5.28 – 5.26 (m, 1H), 5.13 (d,  $J = 4.2$  Hz, 1H), 4.74 (dd,  $J = 10.6, 4.2$  Hz, 1H), 4.46 – 4.42 (m, 1H), 4.41 (d,  $J = 8.8$  Hz, 1H), 4.37 (d,  $J = 4.4$  Hz, 1H), 4.36 – 4.34 (m, 1H), 4.34 – 4.28 (m, 2H), 4.28 – 4.25 (m, 1H), 4.25 – 4.22 (m, 1H), 4.15 – 4.11 (m, 1H), 4.01 – 3.96 (m, 3H), 3.93 – 3.89 (m, 1H), 3.86 (t,  $J = 9.9$  Hz, 1H), 3.34 (dd,  $J = 14.1, 3.4$  Hz, 1H), 3.27 (dd,  $J = 13.7, 2.8$  Hz, 1H), 2.92 (dd,  $J = 13.7, 8.4$  Hz, 1H), 2.25 (q,  $J = 12.9$  Hz, 1H), 2.05 (dt,  $J = 12.9, 4.4$  Hz, 1H) ppm, 7H exchangeable protons merge with  $H_2O$ .

**$^{13}C\{^1H\}$  NMR** (151 MHz,  $CD_3OD$ )  $\delta$ : 167.3, 167.2, 166.4, 165.8, 165.6, 160.2 – 158.4 (5 $\times$ COCF<sub>3</sub>), 138.7, 135.0, 135.0, 134.5, 134.5, 134.5, 131.3, 131.0, 131.0, 130.7, 130.6, 130.6, 130.5, 130.0, 130.0, 129.9,

129.8, 129.7, 129.6, 129.2, 129.1, 129.0, 127.5, 117.8 – 116.5 (5×CF<sub>3</sub>), 110.5, 103.1, 98.0, 97.6, 87.3, 80.5, 77.5, 77.2, 77.1, 75.8, 75.6, 71.2, 69.9, 69.4, 67.7, 64.8, 53.6, 50.5, 49.9, 49.6, 49.4, 44.4, 40.7, 31.8 ppm.

**HRMS** (ESI/Q-TOF): *m/z* [M+H]<sup>+</sup> Calcd for C<sub>75</sub>H<sub>66</sub>N<sub>6</sub>O<sub>23</sub>F<sub>15</sub> 1703.3940; Found 1703.3945.

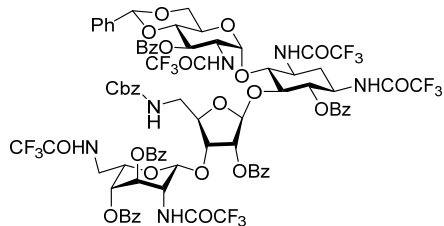

**5''-Deoxy-5''-(O-benzylcarbamoyl)-6,3',2'',3''',4'''-penta-O-benzoyl-4',6'-O-benzylidene-1,3,2',2''',6'''-penta-N-trifluoroacetyl paromomycin (**22**).**

A stirred solution of 5''-deoxy-5''-amino paromomycin derivative **21** (3.59 g, 2.11 mmol, 1.0 equiv) in anhydrous DCM (30 mL) was cooled to 0 °C (crushed ice bath) and Cbz-Cl (1.2 mL, 8.43 mmol, 4.0 equiv) was added dropwise over 5 min. The resulting yellowish solution was stirred at 0 °C for 1 h followed by dropwise addition (over 5 min) of pyridine (0.34 mL, 4.21 mmol, 2.0 equiv). The resulting yellow solution was stirred at 0 °C for 1 h, then warmed up to room temperature and stirring was continued for additional 2 h. The reaction progress was monitored by UPLC-MS assay. The yellowish solution was diluted with water (50 mL) and back-extracted with DCM (2×30 mL). Combined organic extracts were washed with brine (30 mL), dried over anhydrous Na<sub>2</sub>SO<sub>4</sub> and evaporated under reduced pressure. The crude yellow oil was purified by silica gel column chromatography using gradient elution from 25 % EtOAc in hexane to 50 % EtOAc in hexane. Fractions containing the product (detected with TLC and ESI-MS) were combined and concentrated under reduced pressure. The residue was dissolved in DCM (10 mL) and hexane (100 mL) was added. The formed white precipitate was collected by suction filtration and dried under reduced pressure to give product **22** (3.45 g, 89 % yield) as a white powder. An aliquot of **22** (100 mg) was purified by reversed-phase preparative HPLC (XBridge® Prep C18 OBD™ column) using gradient elution from 10 % to 90 % MeCN in 0.1 % aqueous AcOH solution; analytical TLC on silica gel, 1:2 EtOAc/petroleum ether, *R<sub>f</sub>*=0.24. [ $\alpha$ ]<sub>D</sub><sup>23</sup> +6.5 (*c* 1.74, MeOH).

**<sup>1</sup>H NMR** (600 MHz, CDCl<sub>3</sub>)  $\delta$ : 8.66 (t, *J* = 5.9 Hz, 1H), 8.12 – 8.02 (m, 2H), 7.97 – 7.93 (m, 4H), 7.93 – 7.87 (m, 1H), 7.87 – 7.83 (m, 2H), 7.81 – 7.74 (m, 2H), 7.69 – 7.65 (m, 2H), 7.63 – 7.60 (m, 1H), 7.59 – 7.57 (m, 1H), 7.53 – 7.46 (m, 5H), 7.43 – 7.40 (m, 2H), 7.38 – 7.36 (m, 2H), 7.33 – 7.28 (m, 11H), 7.21 – 7.15 (m, 2H), 7.09 – 7.03 (m, 2H), 7.01 – 6.89 (m, 1H), 6.08 – 5.95 (m, 1H), 5.70 – 5.61 (m, 1H), 5.59 – 5.53 (m, 1H), 5.46 – 5.40 (m, 2H), 5.34 – 5.24 (m, 3H), 5.14 (d, *J* = 5.1 Hz, 1H), 5.11 (t, *J* = 4.5 Hz, 1H), 5.08 – 5.02 (m, 2H), 4.95 – 4.82 (m, 1H), 4.57 – 4.50 (m, 1H), 4.33 – 4.27 (m, 3H), 4.25 – 4.18 (m, 2H), 4.15 – 4.07 (m, 2H), 4.00

– 3.97 (m, 2H), 3.90 – 3.81 (m, 2H), 3.71 – 3.63 (m, 2H), 3.45 – 3.28 (m, 1H), 3.27 – 3.13 (m, 1H), 2.39 – 2.29 (m, 1H) ppm.

$^{13}\text{C}\{^1\text{H}\}$  NMR (151 MHz,  $\text{CDCl}_3$ )  $\delta$ : 167.3, 167.2, 165.8, 165.1, 164.2, 157.7, 158.4 – 157.0 ( $5\times\text{COCF}_3$ ), 136.8, 136.3, 134.4, 134.3, 134.2, 133.8, 133.7, 130.3, 130.0, 129.9, 129.8, 129.8, 129.4, 128.9, 128.9, 128.8, 128.7, 128.7, 128.6, 128.4, 128.3, 128.2, 128.1, 127.9, 127.8, 127.4, 126.4, 126.3, 117.1 – 114.3 ( $5\times\text{CF}_3$ ), 107.0, 102.0, 98.8, 97.6, 81.1, 78.7, 77.9, 75.5, 74.2, 72.7, 69.9, 68.9, 68.4, 67.1, 64.1, 53.9, 49.9, 49.4, 49.2, 48.7, 42.3, 40.9, 31.7 ppm.

HRMS (ESI/Q-TOF):  $m/z$   $[\text{M}+\text{Na}]^+$  Calcd for  $\text{C}_{83}\text{H}_{71}\text{N}_6\text{O}_{25}\text{F}_{15}\text{Na}$  1859.4127; Found 1859.4125.

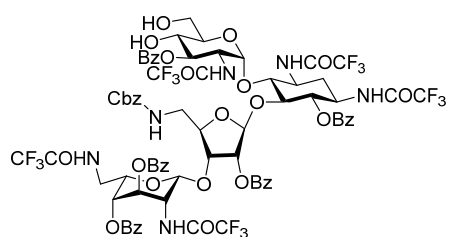

**5''-Deoxy-5''-(O-benzylcarbamoyl)-6,3',2'',3''',4'''-penta-O-benzoyl-1,3,2',2''',6'''-penta-N-trifluoroacetyl paromomycin (23).**

A solution of 5''-deoxy-5''-carboxybenzylamino paromomycin derivative **22** (2.64 g, 1.43 mmol, 1.0 equiv) in 80 % aqueous acetic acid (12.4 mL, prepared by mixing 10.1 mL of glacial acetic acid and 2.3 mL of water) was heated to 65 °C for 18 h, and the reaction progress was monitored by UPLC-MS assay. After cooling to room temperature, the colorless solution was concentrated under reduced pressure and the residue was co-evaporated with toluene (50 mL). The crude colorless oil was purified by silica gel column chromatography using gradient elution from 25 % EtOAc in hexane to 100 % EtOAc. Fractions containing the product (detected with TLC and ESI-MS) were combined and concentrated under reduced pressure. The residue was dissolved in DCM (10 mL) and hexane (100 mL) was added. The formed white precipitate was collected by suction filtration and dried under reduced pressure to give product **23** (2.16 g, 86 % yield) as a white powder. An aliquot of **23** (100 mg) was purified by reversed-phase preparative HPLC (XBridge® Prep C18 OBD™ column) using gradient elution from 5 % to 95 % MeCN in 0.1 % aqueous AcOH solution; analytical TLC on silica gel, 1:1 EtOAc/petroleum ether,  $R_f=0.32$ .  $[\alpha]_D^{23} +27.4$  ( $c$  1.02, MeOH).

$^1\text{H}$  NMR (600 MHz,  $\text{CD}_3\text{OD}$ )  $\delta$ : 8.26 – 8.23 (m, 2H), 8.10 – 8.06 (m, 2H), 8.00 – 7.97 (m, 2H), 7.85 – 7.80 (m, 2H), 7.76 – 7.72 (m, 1H), 7.64 – 7.58 (m, 6H), 7.48 – 7.42 (m, 7H), 7.37 – 7.33 (m, 2H), 7.32 – 7.29 (m, 1H), 7.29 – 7.24 (m, 2H), 7.15 (dd,  $J=7.7, 7.5$  Hz, 1H), 7.01 – 6.97 (m, 2H), 5.88 (d,  $J=4.0$  Hz, 1H), 5.38 (dd,  $J=11.0, 8.8$  Hz, 1H), 5.34 (s, 1H), 5.33 – 5.30 (m, 1H), 5.29 (t,  $J=3.0$  Hz, 1H), 5.25 (d,  $J=12.6$  Hz, 1H), 5.22 (d,  $J=4.6$  Hz, 1H), 5.20 – 5.17 (m, 2H), 5.17 – 5.13 (m, 1H), 4.54 (dd,  $J=11.0, 4.0$  Hz, 1H), 4.51 – 4.47 (m, 1H),

4.36 – 4.31 (m, 2H), 4.25 (dd, J = 8.1, 3.6 Hz, 1H), 4.12 (dd, J = 10.4, 8.6 Hz, 1H), 3.95 (ddd, J = 8.4, 6.1, 3.0 Hz, 1H), 3.90 (d, J = 10.5 Hz, 1H), 3.81 – 3.79 (m, 2H), 3.78 – 3.75 (m, 1H), 3.62 (dd, J = 14.2, 3.2 Hz, 1H), 3.57 (d, J = 6.5 Hz, 2H), 3.40 (dd, J = 14.2, 6.2 Hz, 1H), 2.11 (q, J = 12.6 Hz, 1H), 2.03 (dt, J = 13.1, 4.6 Hz, 1H) ppm, 8H exchangeable protons merge with H<sub>2</sub>O.

<sup>13</sup>C{<sup>1</sup>H} NMR (151 MHz, CD<sub>3</sub>OD) δ: 167.8, 167.2, 166.5, 166.4, 165.5, 159.2, 159.9 – 158.2 (5×COCF<sub>3</sub>), 138.3, 135.1, 134.9, 134.7, 134.4, 134.3, 134.2, 131.3, 131.1, 131.0, 130.9, 130.8, 130.7, 130.5, 129.9, 129.8, 129.6, 129.5, 129.5, 129.4, 129.4, 129.2, 129.0, 128.8, 118.8 – 115.5 (5×CF<sub>3</sub>), 109.7, 98.9, 97.5, 85.1, 81.9, 78.5, 77.7, 76.8, 76.5, 74.9, 74.2, 73.8, 69.6, 69.4, 67.8, 61.9, 53.4, 50.4, 50.3, 49.7, 49.6, 43.8, 41.0, 32.3 ppm.

HRMS (ESI/Q-TOF): *m/z* [M+Na]<sup>+</sup> Calcd for C<sub>76</sub>H<sub>65</sub>N<sub>6</sub>O<sub>25</sub>F<sub>15</sub>Na 1771.3814; Found 1771.3860

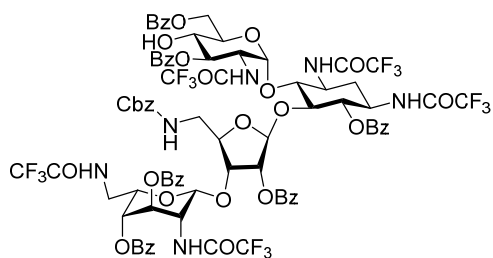

**5''-Deoxy-5''-(O-benzylcarbamoyl)-6,3',6',2'',3''',4''''-hexa-O-benzoyl-1,3,2',2''',6''''-penta-N-trifluoroacetyl paromomycin (24).**

A stirred solution of paromomycin derivative **23** (2.06 g, 1.18 mmol, 1.0 equiv) in anhydrous MeCN (25 mL) was cooled to 0 °C (crushed ice bath). NEt<sub>3</sub> (0.25 mL, 1.76 mmol, 1.5 equiv) was added, followed by dropwise addition of a benzoyl cyanide (170 mg, 1.29 mmol, 1.1 equiv) solution in anhydrous MeCN (5 mL) over 30 min period. After stirring for additional 2 h at 0 °C, the clear colorless solution was quenched by addition of MeOH (0.5 mL) and concentrated under reduced pressure. The crude product was purified by silica gel column chromatography using gradient elution from 25 % EtOAc in hexane to 50 % EtOAc in hexane. Fractions containing the product (detected with TLC and ESI-MS), were combined and concentrated under reduced pressure. The residue was dissolved in DCM (10 mL) and hexane (100 mL) was added to the well-stirred solution. The formed white precipitate was collected by suction filtration and dried under reduced pressure to give product **24** (1.98 g, 91 % yield) as a white powder. An aliquot of **24** (100 mg) was purified by reversed-phase preparative HPLC (XBridge® Prep C18 OBD™ column) using gradient elution from 5 % to 95 % MeCN in 0.1 % aqueous AcOH solution; analytical TLC on silica gel, 1:1 EtOAc/petroleum ether, *R<sub>f</sub>*=0.44. [ $\alpha$ ]<sub>D</sub><sup>23</sup> +39.3 (*c* 1.09, MeOH).

<sup>1</sup>H NMR (600 MHz, CD<sub>3</sub>OD) δ: 8.30 – 8.17 (m, 2H), 8.14 – 8.03 (m, 4H), 8.04 – 7.98 (m, 2H), 7.84 – 7.76 (m, 2H), 7.74 (dd, J = 7.7, 7.5 Hz, 1H), 7.68 – 7.56 (m, 5H), 7.56 – 7.48 (m, 2H), 7.48 – 7.40 (m, 7H), 7.36 – 7.27 (m, 4H), 7.27 – 7.18 (m, 3H), 7.11 (dd, J = 7.7, 7.5 Hz, 1H), 7.01 – 6.93 (m, 2H), 5.93 (d, J = 4.0 Hz, 1H), 5.49

– 5.44 (m, 1H), 5.37 (s, 1H), 5.33 (t,  $J = 9.8$  Hz, 1H), 5.27 (t,  $J = 3.0$  Hz, 1H), 5.23–5.12 (m, 3H), 5.11 (d,  $J = 12.6$  Hz, 1H), 5.06 (d,  $J = 12.6$  Hz, 1H), 4.67 (d,  $J = 12.6$  Hz, 1H), 4.64 – 4.55 (m, 2H), 4.47 – 4.42 (m, 1H), 4.39 (t,  $J = 9.0$  Hz, 1H), 4.36 – 4.28 (m, 2H), 4.26 (dd,  $J = 8.4, 4.7$  Hz, 1H), 4.12 (dd,  $J = 10.3, 8.4$  Hz, 1H), 4.09 – 4.02 (m, 2H), 3.96 – 3.88 (m, 1H), 3.85 – 3.80 (m, 1H), 3.62 (dd,  $J = 14.6, 3.2$  Hz, 1H), 3.55 – 3.44 (m, 2H), 3.37 (dd,  $J = 14.6, 5.7$  Hz, 1H), 2.15 (q,  $J = 12.9$  Hz, 1H), 2.05 (dt,  $J = 12.9, 4.4$  Hz, 1H) ppm, 7H exchangeable protons merge with H<sub>2</sub>O.

<sup>13</sup>C{<sup>1</sup>H} NMR (151 MHz, CD<sub>3</sub>OD)  $\delta$ : 168.1, 167.8, 167.2, 166.4, 166.3, 165.5, 159.0, 160.1 – 157.7 (5 $\times$ COCF<sub>3</sub>), 138.3, 135.0, 134.9, 134.7, 134.4, 134.3, 131.3, 131.2, 131.0, 130.9, 130.8, 130.7, 130.6, 130.5, 129.9, 129.7, 129.6, 129.6, 129.5, 129.4, 129.4, 129.2, 128.9, 128.5, 118.5 – 116.0 (5 $\times$ CF<sub>3</sub>), 109.6, 98.8, 97.6, 85.3, 81.5, 78.1, 78.1, 76.7, 76.6, 74.9, 73.7, 72.0, 69.6, 69.3, 67.7, 67.7, 63.7, 53.5, 50.6, 50.3, 49.8, 43.4, 40.8, 32.2 ppm.

HRMS (ESI/Q-TOF):  $m/z$  [M+Na]<sup>+</sup> Calcd for C<sub>83</sub>H<sub>71</sub>N<sub>6</sub>O<sub>26</sub>F<sub>15</sub>Na 1875.4076; Found 1875.4088.

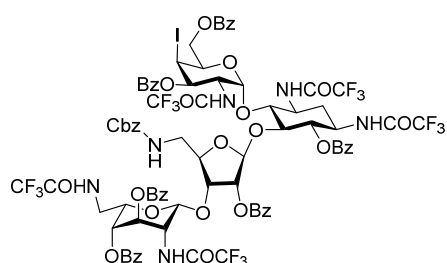

**4',5''-Dideoxy-5''-(O-benzylcarbamoyl)-6,3',6',2'',3''',4''''-hexa-O-benzoyl-4'-iodo-1,3,2',2''',6''''-penta-N-trifluoroacetyl 4'-epi-paromomycin (25).** A stirred solution of hexa-O-benzoyl paromomycin derivative **24** (6.39 g, 3.45 mmol, 1.0 equiv) in anhydrous DCM (70 mL) was cooled to 0 °C (crushed ice bath) and treated with anhydrous pyridine (2.1 mL, 25.9 mmol, 7.5 equiv).

Trifluoromethanesulfonic anhydride (1.7 mL, 10.3 mmol, 3.0 equiv) was then added dropwise over a period of 15 min. Upon completion of the addition, the yellow solution turned light brown. After stirring at 0 °C for 1 h, the solution was washed with water (120 mL) and organic layer was back-extracted with DCM (2 $\times$ 60 mL). Combined organic layers were dried over anhydrous Na<sub>2</sub>SO<sub>4</sub>, filtered and concentrated to dryness under reduced pressure. The obtained yellow oil was dissolved in anhydrous acetone (70 mL) and potassium iodide (5.73 g, 34.5 mmol, 10.0 equiv) was added. The resulting well-stirred suspension was heated at 55 °C for 6 h, and the reaction progress was monitored by UPLC-MS assay. After cooling to room temperature, the orange suspension was filtered through the pad of *Celite*<sup>®</sup>. The filter plug was washed with DCM, the combined filtrates were dried over anhydrous Na<sub>2</sub>SO<sub>4</sub>, filtered and evaporated under reduced pressure. The crude product was purified by silica gel column chromatography using gradient elution from 25 % EtOAc in hexane to 50 % EtOAc in hexane. Fractions containing the product (detected with TLC and ESI-MS) were combined and concentrated under reduced pressure. The residue was dissolved in DCM (20 mL) and hexane (200 mL) was added to the well-stirred solution. The formed

white precipitate was collected by suction filtration and dried under reduced pressure to give product **25** (5.64 g, 83 % yield) as a white powder. An aliquot of **25** (100 mg) was purified by reversed-phase preparative HPLC (XBridge® Prep C18 OBD™ column) using gradient elution from 5 % to 95 % MeCN in 0.1 % aqueous AcOH solution; analytical TLC on silica gel, 1:1 EtOAc/petroleum ether,  $R_f=0.56$ ;  $[\alpha]_D^{23} +28.8$  (c 1.04, MeOH).

**$^1\text{H}$  NMR** (600 MHz,  $\text{CD}_3\text{OD}$ )  $\delta$ : 8.31-8.23 (m, 2H), 8.13-8.06 (m, 2H), 8.06 – 7.98 (m, 4H), 7.82-7.73 (m, 3H), 7.70 – 7.57 (m, 5H), 7.56 – 7.37 (m, 11H), 7.35 – 7.30 (m, 2H), 7.29 – 7.20 (m, 3H), 7.05 (dd,  $J = 7.6, 7.4$  Hz, 1H), 7.00-6.90 (m, 2H), 6.11 (d,  $J = 3.8$  Hz, 1H), 5.40 (s, 1H), 5.35 – 5.29 (m, 2H), 5.27 – 5.25 (m, 1H), 5.24 – 5.11 (m, 5H), 5.03 (dd,  $J = 11.0, 3.8$  Hz, 1H), 4.66 (dd,  $J = 11.0, 3.8$  Hz, 1H), 4.61 (dd,  $J = 10.7, 5.4$  Hz, 1H), 4.52 – 4.47 (m, 1H), 4.41 – 4.28 (m, 5H), 4.07 (dd,  $J = 10.3, 8.5$  Hz, 1H), 3.94 (ddd,  $J = 8.9, 5.8, 3.5$  Hz, 1H), 3.90 – 3.86 (m, 1H), 3.75 – 3.64 (m, 2H), 3.61 – 3.49 (m, 2H), 3.42 (dd,  $J = 14.7, 5.8$  Hz, 1H), 2.14 (q,  $J = 12.8$  Hz, 1H), 2.04 (dt,  $J = 12.8, 4.4$  Hz, 1H) ppm, 6H exchangeable protons merge with  $\text{H}_2\text{O}$ .

**$^{13}\text{C}\{^1\text{H}\}$  NMR** (151 MHz,  $\text{CD}_3\text{OD}$ )  $\delta$ : 167.1, 167.0, 166.6, 166.5, 166.2, 165.6, 159.2, 160.2 – 158.1 ( $5\times\text{COCF}_3$ ), 138.4, 135.0, 135.0, 134.9, 134.7, 134.6, 134.3, 131.3, 131.1, 130.9, 130.9, 130.7, 130.6, 130.5, 130.2, 129.9, 129.8, 129.6, 129.5, 129.4, 129.3, 129.1, 128.9, 128.8, 118.5 – 115.7 ( $5\times\text{CF}_3$ ), 109.8, 98.8, 97.3, 85.4, 81.7, 77.9, 77.6, 76.7, 76.7, 73.7, 70.2, 69.7, 67.8, 67.7, 67.6, 67.5, 52.0, 50.3, 50.3, 49.7, 43.4, 40.9, 37.8, 32.0 ppm.

**HRMS** (ESI/Q-TOF):  $m/z$   $[\text{M}+\text{Na}]^+$  Calcd for  $\text{C}_{83}\text{H}_{70}\text{N}_6\text{O}_{25}\text{F}_{15}\text{NaI}$  1985.3093; Found 1985.3112.

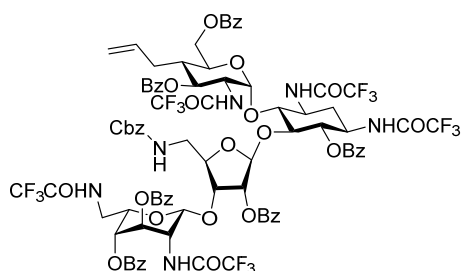

**4'-Allyl-4',5''-dideoxy-5''-(O-benzylcarbamoyl)-6,3',6',2'',3''',4''''-hexa-O-benzoyl-1,3,2',2''',6''''-penta-N-trifluoroacetyl paromomycin (**26**).** To a stirred solution of 4'-

dideoxy-4'-iodo-4'-*epi*-paromomycin **25** (1.01 g, 0.51 mmol, 1.0 equiv) in anhydrous 1,2-dichlorobenzene (35 mL) under argon atmosphere was added allyl phenyl sulfone (0.79 mL, 5.13 mmol, 10.0 equiv). After stirring at ambient temperature for 5 min, the resulting colorless clear solution was cooled to 0 °C (crushed ice bath) and  $\text{BeT}_3$  (1.0 M solution in hexanes; 1.54 mL, 1.54 mmol, 3.0 equiv) was then added over a period of 1 min with gentle stirring keeping the needle under the surface of the solution. The septa was removed and the colorless reaction solution was stirred under air at 0 °C for 1 h, whereupon another portion of  $\text{BeT}_3$  (1.0 M solution in hexanes; 1.54 mL, 1.54 mmol, 3.0 equiv)

was added by the same technique and stirring continued for another 1 hour. Altogether, five portions of  $\text{BEt}_3$  (5×1.54 mL) were added after every 1-2 h to achieve full conversion (the reaction progress was monitored by UPLC-MS assay). Then, the reaction mixture was concentrated under reduced pressure, the residue was dissolved in DCM (20 mL) and filtered through a silica gel pad (45×45 mm). The filter plug was first washed with DCM (300 mL) to separate the excess of allyl phenyl sulfone, and then washed with EtOAc (250 mL) to collect the product). The product-containing filtrate was evaporated under reduced pressure and the residue was purified by reversed-phase preparative HPLC (XBridge® Prep C18 OBD™ column) using gradient elution from 70 % to 95 % MeCN in 0.1 % aqueous AcOH solution. Fractions containing the product (detected by TLC and ESI-MS), were combined and concentrated under reduced pressure. The residue was dissolved in DCM (5 mL) and hexane (50 mL) was added to the solution. The formed white precipitate was dried under reduced pressure to give product **26** (498 mg, 40 % yield) as a white powder; analytical TLC on silica gel, 1:1 EtOAc/petroleum ether,  $R_f=0.60$ ;  $[\alpha]_D^{23} +28.7$  (c 1.21, MeOH).

**$^1\text{H}$  NMR** (400 MHz,  $\text{CD}_3\text{OD}$ )  $\delta$ : 8.29 – 8.21 (m, 2H), 8.10-8.02 (m, 4H), 8.01-7.95 (m, 2H), 7.83 – 7.74 (m, 3H), 7.70 – 7.58 (m, 5H), 7.55 – 7.42 (m, 9H), 7.36 – 7.22 (m, 7H), 7.08 (dd,  $J = 7.7, 7.5$  Hz, 1H), 7.00-6.93 (m, 2H), 6.02 (d,  $J = 4.0$  Hz, 1H), 5.88 – 5.72 (m, 1H), 5.50 (t,  $J = 10.7$  Hz, 1H), 5.38 (s, 1H), 5.33 (dd,  $J = 10.5, 9.3$  Hz, 1H), 5.28 (t,  $J = 2.9$  Hz, 1H), 5.24 – 5.17 (m, 3H), 5.16 – 5.07 (m, 2H), 5.06 – 4.97 (m, 1H), 4.91 – 4.88 (m, 1H), 4.67 – 4.58 (m, 3H), 4.49 – 4.45 (m, 1H), 4.41 (t,  $J = 8.8$  Hz, 1H), 4.38 – 4.26 (m, 3H), 4.15 – 4.07 (m, 2H), 3.98 – 3.89 (m, 1H), 3.88 – 3.85 (m, 1H), 3.72 – 3.63 (m, 1H), 3.58 – 3.48 (m, 2H), 3.42 – 3.34 (m, 1H), 2.50 – 2.40 (m, 1H), 2.31 – 2.24 (m, 2H), 2.14 (q,  $J = 12.7$  Hz, 1H), 2.07-2.00 (m, 1H) ppm, 6H exchangeable protons merge with  $\text{H}_2\text{O}$ .

**$^{13}\text{C}\{^1\text{H}\}$  NMR** (101 MHz,  $\text{CD}_3\text{OD}$ )  $\delta$ : 67.8, 167.6, 167.2, 166.4, 166.2, 165.6, 160.2 – 158.3 (5× $\text{COCF}_3$ ), 159.0, 138.3, 135.4, 135.0, 134.9, 134.6, 134.5, 134.5, 134.3, 131.3, 131.1, 131.0, 130.9, 130.8, 130.6, 130.5, 129.9, 129.7, 129.6, 129.5, 129.4, 129.4, 129.1, 128.9, 128.5, 117.9, 119.2 – 115.5 (5× $\text{CF}_3$ ), 109.8, 98.8, 97.8, 85.7, 81.4, 78.2, 78.1, 76.8, 76.7, 73.7, 72.4, 71.3, 69.7, 67.7, 67.7, 64.7, 54.4, 50.7, 50.3, 49.7, 43.5, 42.7, 40.8, 32.6, 32.3 ppm.

**HRMS** (ESI/Q-TOF):  $m/z$   $[\text{M}+\text{Na}]^+$  Calcd for  $\text{C}_{86}\text{H}_{75}\text{N}_6\text{O}_{25}\text{F}_{15}\text{Na}$  1899.4440; Found 1899.4436.



## General Procedure A for the photochemically initiated radical allylation of iodo paromomycin derivatives 25 and 29

An oven-dried Biotage microwave pressure vial (10 mL) was cooled under a stream of argon, equipped with a stirring bar and charged with iodide (1.0 equiv) and 2,4,5,6-tetra(9*H*-carbazol-9-yl)isophthalonitrile (4CzIPN) (0.05 equiv). The vial was sealed and flushed with argon. Anhydrous degassed DMSO was added, followed by NEt<sub>3</sub> (3.0 equiv) and allyl phenyl sulfone (2.0-5.0 equiv). The well-stirred yellow reaction mixture was irradiated at ambient temperature with blue LED light for 1-18 h. After dilution with water (15 mL) and addition of EtOAc (15 mL), layers were separated, and the aqueous layer was back-extracted with EtOAc (3×15 mL). The combined organic layers were washed with brine (10 mL), dried over anhydrous Na<sub>2</sub>SO<sub>4</sub> and evaporated under reduced pressure.

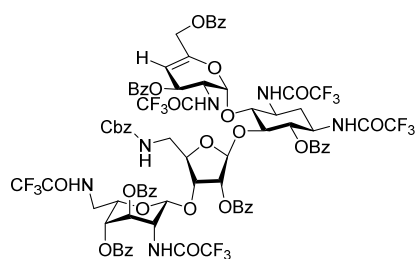

**4',5''-Dideoxy-5''-(*O*-benzylcarbamoyl)-6,3',6',2'',3''',4''''-hexa-*O*-benzoyl-1,3,2',2''',6''''-penta-*N*-trifluoroacetyl paromomycin-4'-ene (27).** The title compound was obtained from 4'-*epi*-iodo-paromomycin **25** (50 mg, 0.026 mmol, 1.0 equiv), 4CzIPN (1 mg, 0.0013 mmol, 0.05 equiv), allyl phenyl sulfone (8 μL, 0.051 mmol, 2.0 equiv) and NEt<sub>3</sub> (11 μL, 0.076 mmol, 3.0 equiv) in degassed DMSO (1 mL) by following General Procedure A. Pure product **27** was obtained by silica gel column chromatography using gradient elution from 25 % EtOAc in heptane to 35 % EtOAc in heptane; white powder (30 mg, 64 % yield), analytical TLC on silica gel, 1:2 EtOAc/petroleum ether, *R<sub>f</sub>*=0.26. [α]<sub>D</sub><sup>23</sup> +55.7 (c 0.93, MeOH).

**<sup>1</sup>H NMR** (400 MHz, CD<sub>3</sub>OD) δ: 8.28 – 8.21 (m, 2H), 8.13 – 8.08 (m, 2H), 8.08 – 8.03 (m, 2H), 8.01 – 7.96 (m, 2H), 7.93 – 7.86 (m, 2H), 7.78 – 7.72 (m, 1H), 7.70 – 7.56 (m, 7H), 7.53 – 7.44 (m, 7H), 7.42 – 7.37 (m, 2H), 7.36 – 7.22 (m, 6H), 7.11 – 7.01 (m, 1H), 6.07 – 5.98 (m, 1H), 5.73 – 5.64 (m, 1H), 5.41 – 5.33 (m, 2H), 5.31 – 5.27 (m, 2H), 5.25 (dd, *J* = 9.0, 3.6 Hz, 2H), 5.19 – 5.15 (m, 1H), 5.14 – 5.09 (m, 1H), 5.08 – 5.04 (m, 1H), 4.97 – 4.90 (m, 1H), 4.83 – 4.74 (m, 2H), 4.47 (t, *J* = 6.6 Hz, 1H), 4.39 – 4.24 (m, 3H), 4.17 – 4.05 (m, 2H), 4.04 – 3.96 (m, 1H), 3.72 – 3.66 (m, 1H), 3.60 – 3.49 (m, 4H), 2.16 (q, *J* = 12.7 Hz, 1H), 2.09 – 2.01 (m, 1H) ppm, 6H exchangeable protons merge with H<sub>2</sub>O.

**<sup>13</sup>C{<sup>1</sup>H} NMR** (101 MHz, CD<sub>3</sub>OD) δ: 167.4, 167.2, 167.1, 166.6, 166.4, 165.5, 160.2 – 158.2 (5×COCF<sub>3</sub>), 149.5, 138.3, 135.1, 134.9, 134.9, 134.6, 134.4, 131.3, 131.1, 131.0, 130.9, 130.8, 130.7, 130.7, 130.6, 130.5, 129.9, 129.9, 129.7, 129.6, 129.5, 129.5, 129.3, 128.9, 128.7, 119.0 – 115.2 (5×CF<sub>3</sub>), 109.3, 100.0,

99.0, 97.8, 83.3, 82.2, 78.8, 78.4, 76.7, 75.9, 73.7, 69.5, 68.0, 67.8, 67.7, 63.8, 51.3, 50.4, 49.9, 49.5, 43.1, 41.1, 31.9 ppm.

**HRMS** (ESI/Q-TOF):  $m/z$   $[M+Na]^+$  Calcd for  $C_{83}H_{69}N_6O_{25}F_{15}Na$  1857.3971; Found 1857.4004.

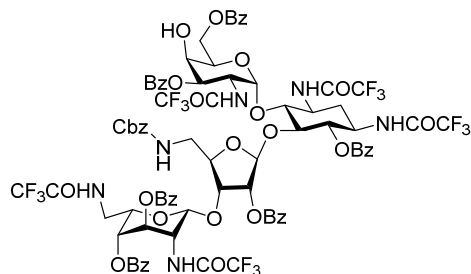

**5''-Deoxy-5''-(O-benzylcarbamoyl)-6,3',6',2'',3''',4''''-hexa-O-benzoyl-1,3,2',2''',6''''-penta-N-trifluoroacetyl 4'-epi-**

**paromomycin (28).** A stirred solution of 4'-hydroxy paromomycin derivative **24** (600 mg, 0.32 mmol, 1.0 equiv) in anhydrous DCM (12 mL) was cooled to 0 °C (crushed ice bath)

and treated with anhydrous pyridine (0.2 mL, 2.4 mmol, 7.5 equiv). Trifluoromethanesulfonic anhydride (0.16 mL, 0.97 mmol, 3.0 equiv) was then added dropwise over a period of 5 min, whereupon the light yellow solution turned brownish. After stirring at 0 °C for 1 h, the reaction mixture was washed with aqueous 5 %  $KHSO_4$  solution (15 mL), the organic layer was washed with saturated aqueous  $NaHCO_3$  solution (15 mL) and water (20 mL). Organic layer was dried over anhydrous  $Na_2SO_4$ , filtered and concentrated to dryness under reduced pressure. The brownish viscous oily residue was dissolved in anhydrous DMF (8 mL) and sodium nitrite (134 mg, 1.94 mmol, 6.0 equiv) was added, whereupon the color turned dark red. The reaction mixture was stirred at ambient temperature for 18 h, and the reaction color gradually changed back to the light brown. Water (20 mL) was then added to the brownish reaction mixture and the solution was back-extracted with EtOAc (3×20 mL). Combined organic layers were washed with water (20 mL) and brine (20 mL), dried over anhydrous  $Na_2SO_4$  filtered and concentrated to dryness under reduced pressure. The crude product was purified by silica gel column chromatography using gradient elution from 25 % EtOAc in hexane to 50 % EtOAc in hexane. Fractions containing the product (detected by TLC and ESI-MS), were combined and concentrated under reduced pressure. The residue was dissolved in DCM (5 mL) and hexane (50 mL) was poured to the solution. The formed white precipitate was collected by suction filtration and dried under reduced pressure to give product **28** (427 mg, 71 % yield) as a white powder. An aliquot of **28** (60 mg) was purified by reversed-phase preparative HPLC (XBridge® Prep C18 OBD™ column) using gradient elution from 50 % to 95 % MeCN in 0.1 % aqueous AcOH solution; analytical TLC on silica gel, 1:1 EtOAc/petroleum ether,  $R_f=0.56$ .  $[\alpha]_D^{23} +22.0$  (c 1.08, MeOH).

**<sup>1</sup>H NMR** (600 MHz, CD<sub>3</sub>OD) δ: 8.30-8.22 (m, 2H), 8.12-8.07 (m, 2H), 8.07 – 8.00 (m, 5H), 7.82 – 7.78 (m, 2H), 7.78-7.72 (m, 1H), 7.69 – 7.54 (m, 7H), 7.53 – 7.40 (m, 9H), 7.37 – 7.31 (m, 2H), 7.31 – 7.24 (m, 3H), 7.14 – 7.08 (m, 1H), 7.01 – 6.94 (m, 2H), 6.05 (d, *J* = 3.8 Hz, 1H), 5.44 – 4.98 (m, 10H), 4.57 – 4.52 (m, 1H), 4.51 – 4.46 (m, 2H), 4.39 – 4.26 (m, 5H), 4.10 – 4.01 (m, 1H), 3.95 (ddd, *J* = 8.4, 5.4, 3.4 Hz, 1H), 3.86 – 3.79 (m, 1H), 3.69 – 3.62 (m, 1H), 3.60 (dd, *J* = 14.0, 5.4 Hz, 1H), 3.53 (dd, *J* = 14.3, 7.2 Hz, 1H), 3.44 (dd, *J* = 14.3, 5.4 Hz, 1H), 2.14 (q, *J* = 12.8 Hz, 1H), 2.03 (dt, *J* = 12.8, 4.3 Hz, 1H) ppm, 7H exchangeable protons merge with H<sub>2</sub>O.

**<sup>13</sup>C{<sup>1</sup>H} NMR** (151 MHz, CD<sub>3</sub>OD) δ: 167.5, 167.4, 167.2, 166.5, 166.3, 165.5, 160.0 – 158.1 (5×COCF<sub>3</sub>), 138.4, 135.0, 134.9, 134.7, 134.5, 134.4, 134.3, 134.2, 131.3, 131.1, 131.0, 130.9, 130.9, 130.8, 130.7, 130.6, 130.5, 130.5, 129.9, 129.7, 129.6, 129.6, 129.5, 129.5, 129.4, 129.2, 128.9, 128.7, 118.7 – 115.7 (5×CF<sub>3</sub>), 109.7, 98.9, 97.7, 85.3, 82.0, 78.1, 77.4, 76.8, 76.5, 73.7, 72.6, 69.7, 69.6, 67.8, 67.8, 66.4, 62.7, 50.4, 50.3, 49.8, 49.6, 43.3, 40.9, 32.1 ppm.

**HRMS** (ESI/Q-TOF): *m/z* [M+Na]<sup>+</sup> Calcd for C<sub>83</sub>H<sub>71</sub>N<sub>6</sub>O<sub>26</sub>F<sub>15</sub>Na 1875.4076; Found 1875.4097.

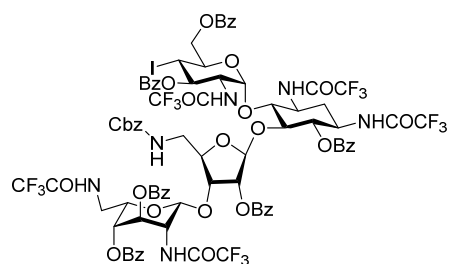

**4',5''-Dideoxy-5''-(O-benzylcarbamoyl)-6,3',6',2'',3''',4''''-hexa-O-benzoyl-4'-iodo-1,3,2',2''',6'''-penta-N-trifluoroacetyl paromomycin (29).** A stirred solution of 4'-*epi*-hydroxy paromomycin derivative **28** (368 mg, 0.20 mmol, 1.0 equiv) in anhydrous DCM (10 mL) was cooled to 0 °C (crushed ice bath) and treated with anhydrous pyridine (0.12 mL, 1.5 mmol, 7.5 equiv).

Trifluoromethanesulfonic anhydride (0.10 mL, 0.60 mmol, 3.0 equiv) was then added dropwise over a period of 5 min. Upon completion of the addition the yellow solution turned brownish. After stirring at 0 °C for 1 h, the resulting mixture was washed with aqueous 5 % KHSO<sub>4</sub> solution (15 mL). Organic layer was washed with saturated aqueous NaHCO<sub>3</sub> solution (15 mL) and water (20 mL). Organic layer was dried over anhydrous Na<sub>2</sub>SO<sub>4</sub>, filtered and concentrated under reduced pressure. The brownish oily residue was dissolved in anhydrous acetone (10 mL) and potassium iodide (330 mg, 2.0 mmol, 10.0 equiv) was added. The resulting well-stirred suspension was heated at at 55 °C for 6 h, and the reaction progress was monitored by UPLC-MS assay. After cooling to room temperature, the brown suspension was filtered through the pad of *Celite*<sup>®</sup>. The filter plug was washed with DCM, the filtrate was dried over anhydrous Na<sub>2</sub>SO<sub>4</sub> and evaporated under reduced pressure. The crude product was purified by silica gel column

chromatography using gradient elution from 25 % EtOAc in hexane to 50 % EtOAc in hexane. Product-containing fractions (detected with TLC and ESI-MS) were combined and concentrated under reduced pressure. The residue was dissolved in DCM (5 mL) and hexane (50 mL) was added. The formed white precipitate was collected by suction filtration and dried under reduced pressure to give product **29** (297 mg, 76 % yield) as a white powder. An aliquot of **29** (60 mg) was purified by reversed-phase preparative HPLC (XBridge® Prep C18 OBD™ column) using gradient elution from 50 % to 95 % MeCN in 0.1 % aqueous AcOH solution; analytical TLC on silica gel, 1:1 EtOAc/petroleum ether,  $R_f=0.62$ .  $[\alpha]_D^{23} +21.5$  (c 1.21, MeOH).

**<sup>1</sup>H NMR** (600 MHz, CD<sub>3</sub>OD)  $\delta$ : 8.28-8.21 (m, 2H), 8.11-8.05 (m, 4H), 8.03-7.99 (m, 2H), 7.80 – 7.73 (m, 3H), 7.66 – 7.58 (m, 5H), 7.52 – 7.41 (m, 9H), 7.32 – 7.22 (m, 7H), 7.12-7.05 (m, 1H), 6.99 – 6.93 (m, 2H), 6.14 – 6.06 (m, 1H), 5.72 – 5.64 (m, 1H), 5.36 – 5.29 (m, 2H), 5.26 (t,  $J = 3.0$  Hz, 1H), 5.23 – 5.12 (m, 3H), 5.12 – 5.06 (m, 2H), 4.84 – 4.80 (m, 2H), 4.69 (dd,  $J = 10.5, 4.0$  Hz, 1H), 4.51 – 4.39 (m, 4H), 4.37 – 4.29 (m, 2H), 4.25 (dd,  $J = 8.4, 4.7$  Hz, 1H), 4.15 – 4.07 (m, 1H), 3.92 – 3.85 (m, 1H), 3.84 – 3.79 (m, 1H), 3.66 – 3.57 (m, 1H), 3.55 – 3.45 (m, 2H), 3.36 (dd,  $J = 14.4, 5.7$  Hz, 1H), 2.17 (q,  $J = 12.8$  Hz, 1H), 2.05 (dt,  $J = 12.8, 4.3$  Hz, 1H) ppm, 6H exchangeable protons merge with H<sub>2</sub>O.

**<sup>13</sup>C{<sup>1</sup>H} NMR** (151 MHz, CD<sub>3</sub>OD)  $\delta$ : 167.6, 167.2, 166.8, 166.4, 166.2, 165.5, 159.8 – 158.4 (5×COCF<sub>3</sub>), 138.2, 135.0, 134.9, 134.7, 134.6, 134.4, 134.2, 131.3, 131.0, 131.0, 130.9, 130.9, 130.7, 130.6, 130.5, 130.5, 129.9, 129.9, 129.8, 129.6, 129.6, 129.6, 129.5, 129.4, 129.1, 129.0, 128.9, 128.6, 118.6 – 115.9 (5×CF<sub>3</sub>), 110.0, 98.7, 97.7, 85.6, 81.4, 78.2, 78.0, 76.7, 76.7, 74.6, 73.8, 72.6, 69.7, 67.7, 67.7, 66.7, 54.2, 50.6, 50.3, 49.7, 49.6, 43.3, 40.8, 32.2, 25.0 ppm.

**HRMS** (ESI/Q-TOF):  $m/z$  [M+Na]<sup>+</sup> Calcd for C<sub>83</sub>H<sub>70</sub>N<sub>6</sub>O<sub>25</sub>F<sub>15</sub>NaI 1985.3093; Found 1985.3099.

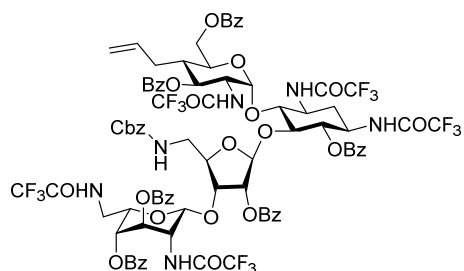

**4'-Allyl-4',5''-dideoxy-5''-(O-benzylcarbonyl)-6,3',6',2'',3''',4'''-hexa-O-benzoyl-1,3,2',2''',6'''-penta-N-trifluoroacetyl paromomycin (26).** The title compound was obtained from 4'-iodo-paromomycin **29** (100 mg, 0.050 mmol, 1.0 equiv), 4CzIPN (2 mg, 0.0025mmol, 0.05 equiv), allylphenyl sulfone (40  $\mu$ L, 0.255 mmol, 5.0 equiv) and NEt<sub>3</sub> (25  $\mu$ L, 0.155 mmol, 3.0 equiv) in degassed DMSO (2 mL) by following General Procedure A. Pure product **26** was



of water) and the mixture was stirred under 5 atm of hydrogen at ambient temperature for 18 h. The reaction progress was monitored by UPLC-MS assay. The black suspension was filtered through a silica gel pad, the filter plug was washed with 80 % aqueous acetic acid and the filtrate was evaporated under reduced pressure. The yellowish residue was dissolved in DCM (5 mL) and hexane (50 mL) was added to the solution. The formed beige precipitate was collected by suction filtration and dried under reduced pressure to give product **31** (463 mg, 100 % yield) as a white powder. An aliquot of **31** (100 mg) was purified by reversed-phase preparative HPLC (XBridge® Prep C18 OBD™ column) using gradient elution from 5 % to 95 % MeCN in 0.1 % aqueous AcOH solution. Product-containing fractions were detected by TLC and ESI-MS (visualization of TLC spots was done by immersing the TLC plate into a solution of sulfuric acid in ethanol (1:15 v:v) and subsequent drying the TLC plate with heat-gun). Combined fractions were concentrated under reduced pressure to afford pure material; analytical TLC on silica gel, 1:1 EtOAc/petroleum ether,  $R_f=0.16$ .  $[\alpha]_D^{23} +34.9$  (c 1.26, MeOH).

**<sup>1</sup>H NMR** (400 MHz, CD<sub>3</sub>OD)  $\delta$ : 8.32 – 8.28 (m, 2H), 8.16-8.06 (m, 4H), 8.02 – 7.99 (m, 2H), 7.80 – 7.75 (m, 1H), 7.74 – 7.68 (m, 4H), 7.67 – 7.60 (m, 3H), 7.57 – 7.50 (m, 3H), 7.50 – 7.43 (m, 4H), 7.43 – 7.38 (m, 2H), 7.25-7.18 (m, 2H), 6.99 – 6.88 (m, 3H), 6.02 (d,  $J = 4.0$  Hz, 1H), 5.50 (t,  $J = 10.7$  Hz, 1H), 5.37 (s, 1H), 5.34 – 5.26 (m, 3H), 5.24 – 5.21 (m, 1H), 5.11 (d,  $J = 4.0$  Hz, 1H), 4.68 (dd,  $J = 12.5, 2.4$  Hz, 1H), 4.56 – 4.49 (m, 2H), 4.47 – 4.39 (m, 2H), 4.37 – 4.25 (m, 2H), 4.25 – 4.20 (m, 1H), 4.14 – 4.06 (m, 2H), 3.96 (t,  $J = 2.4$  Hz, 1H), 3.86 – 3.75 (m, 2H), 3.36 (dd,  $J = 14.1, 3.9$  Hz, 1H), 3.06 (dd,  $J = 13.7, 3.6$  Hz, 1H), 2.83 (dd,  $J = 13.7, 7.4$  Hz, 1H), 2.32 (tt,  $J = 10.9, 3.6$  Hz, 1H), 2.19 (q,  $J = 12.9$  Hz, 1H), 2.03 (dt,  $J = 12.9, 4.4$  Hz, 1H), 1.54 – 1.37 (m, 3H), 1.33 – 1.24 (m, 1H), 0.79 (t,  $J = 6.8$  Hz, 3H) ppm, 7H exchangeable protons merge with H<sub>2</sub>O.

**<sup>13</sup>C{<sup>1</sup>H} NMR** (101 MHz, CD<sub>3</sub>OD)  $\delta$ : 167.8, 167.6, 167.3, 166.4, 165.9, 165.6, 160.2 – 157.9 (5×COCF<sub>3</sub>), 158.8, 135.0, 134.6, 134.5, 134.5, 134.4, 131.3, 131.1, 131.1, 131.0, 130.7, 130.7, 130.6, 130.6, 130.5, 130.5, 130.0, 129.8, 129.7, 129.7, 129.6, 129.3, 129.2, 129.2, 129.0, 119.0 – 115.2 (5×CF<sub>3</sub>), 110.0, 98.2, 97.5, 86.8, 81.3, 77.7, 77.7, 77.1, 76.1, 75.0, 73.0, 71.2, 69.9, 67.6, 65.0, 54.4, 50.7, 50.0, 49.8, 49.5, 49.3, 44.8, 42.8, 40.6, 32.1, 30.4, 20.5, 14.7 ppm.

**HRMS** (ESI/Q-TOF):  $m/z$  [M+H]<sup>+</sup> Calcd for C<sub>78</sub>H<sub>72</sub>N<sub>6</sub>O<sub>23</sub>F<sub>15</sub> 1745.4409; Found 1745.4438.

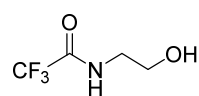

**2,2,2-Trifluoro-N-(2-hydroxyethyl)acetamide (S1)**. The title compound was prepared according to the literature procedure.<sup>2</sup> Thus, to a stirred solution of ethyl-2,2,2-trifluoroacetate (15.7 g, 111 mmol, 1.35 equiv) in anhydrous DCM (10 mL) at 0 °C (crushed ice bath) was

added 2-amino-1-ethanol (5.0 mL, 82 mmol, 1.0 equiv). After warming up to room temperature, the colorless solution was stirred at ambient temperature for 2 h and then concentrated to dryness under reduced pressure to give product **S1** as a colorless viscous oil (12.3 g, 96 % yield). The oil solidified as a white solid after standing for several days. <sup>1</sup>H NMR (300 MHz, CDCl<sub>3</sub>) δ: 6.83 (br s, 1H), 3.81 (t, *J* = 5.2 Hz, 2H), 3.55 (dt, *J* = 5.5, 5.2 Hz, 2H), 1.94 (br s, 1H) ppm, which was identical to that from the literature.<sup>1</sup>

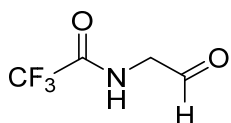

**2,2,2-Trifluoro-N-(2-oxoethyl)acetamide (S1).** An oven-dried pressure tube (100 mL) was cooled under a stream of argon and charged with 2,2,2-trifluoro-*N*-(2-hydroxyethyl)acetamide **S1**, 1.50 g, 9.55 mmol, 1.0 equiv), IBX (2.94 g, 10.5 mmol, 1.1 equiv) and anhydrous THF (25 mL). After heating at 60 °C for 18 h, the orange suspension was cooled to room temperature and filtered through the pad of *Celite*<sup>®</sup>. The filter plug was washed with THF and filtrate was evaporated to dryness under reduced pressure to give product **32** as a brownish solid (1.48 g, 100 % yield) which was used further without additional purification. <sup>1</sup>H NMR (400 MHz, CDCl<sub>3</sub>) δ: 9.72 (s, 1H), 7.02 (br s, 1H), 4.35 (dd, *J* = 4.8, 0.6 Hz, 2H) ppm.

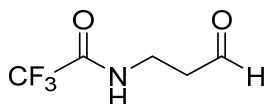

**2,2,2-Trifluoro-N-(3-oxopropyl)acetamide (33).** To a cooled (0 °C, crushed ice bath) neat ethyl-2,2,2-trifluoroacetate (1.78 g, 12.6 mmol, 1.35 equiv) was added neat 3,3-diethoxypropan-1-amine (1.5 mL, 9.3 mmol, 1.0 equiv). The yellowish solution was warmed up to room temperature, stirred at ambient temperature for 3 h and then concentrated to dryness under reduced pressure to give *N*-(3,3-diethoxypropyl)-2,2,2-trifluoroacetamide as a yellow oil (2.26 g, 100 % yield).<sup>2</sup>

The obtained *N*-(3,3-diethoxypropyl)-2,2,2-trifluoroacetamide (2.26 g, 9.3 mmol, 1.0 equiv) was added dropwise to aqueous HCl (1.0 M solution in water, 30 mL) over a period of 15 min at 0 °C (crushed ice bath). After warming to ambient temperature and stirring for 1 h, the yellowish solution was extracted with Et<sub>2</sub>O (3×40 mL). Combined organic extracts were dried over anhydrous Na<sub>2</sub>SO<sub>4</sub>, filtered and concentrated to dryness under reduced pressure to give product **33** as a colorless oil (1.27 g, 81 % yield) which was used in further steps without additional purification. <sup>1</sup>H NMR (400 MHz, CDCl<sub>3</sub>) δ: 9.83 (s, 1H), 6.84 (br s, 1H), 3.66 (dt, *J* = 5.9, 5.6 Hz, 2H), 2.85 (t, *J* = 5.6 Hz, 2H) ppm, which was identical to that from the literature.<sup>3</sup>

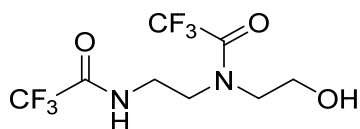

**General Procedure B for reductive amination of amine **31** with aldehydes **32** and **33**.** An oven-dried 50 mL round-bottom flask was cooled under an argon atmosphere and charged with amine **31**

(1.0 equiv) and aldehydes **32** or **33** (2.0 equiv), followed by anhydrous THF (5 mL/0.1 mmol of the amine). The clear solution was stirred at ambient temperature for 10 min, then Na(OAc)<sub>3</sub>BH (4.0 equiv) was added. The resulting pale yellow suspension was stirred at ambient temperature for 18 h and the reaction progress was monitoring by UPLC-MS assay. Upon complete conversion, the yellowish suspension was evaporated under reduced pressure. The crude residue was diluted with water (20 mL) and extracted with EtOAc (3×20 mL). Combined organic extracts were washed with brine (15 mL), dried over anhydrous Na<sub>2</sub>SO<sub>4</sub>, filtered and evaporated under reduced pressure. The residue was dissolved in DCM (5 mL) and hexane (50 mL) was added. The formed pale yellow precipitate was filtered off, washed with hexane (30 mL), dried under reduced pressure and used in the next step without further purification.

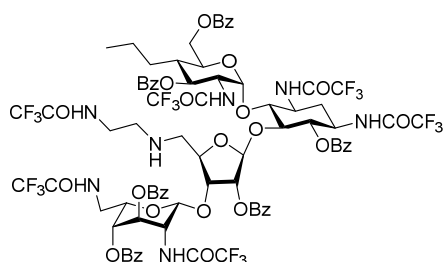

**4',5''-Dideoxy-4'-propyl-5''-(2-trifluoroacetamidoethylamino)-6,3',6',2'',3''',4''''-hexa-O-benzoyl-1,3,2',2''',6''''-penta-N-trifluoroacetyl paromomycin (**34**).** The title compound was obtained as a yellowish solid (648 mg, 100 % yield) from amine **31** (600 mg, 0.34 mmol, 1.0 equiv), aldehyde **32** (107 mg, 0.69 mmol, 2.0 equiv) and Na(OAc)<sub>3</sub>BH (292 mg, 1.38 mmol, 4.0 equiv) by

following General Procedure B. The crude product **34** was used in further without additional purification.

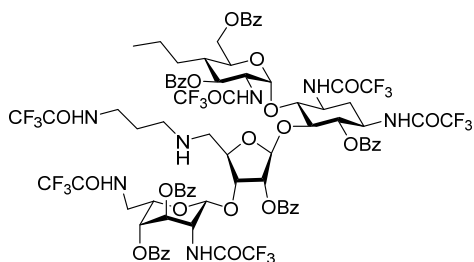

**4',5''-Dideoxy-4'-propyl-5''-(3-trifluoroacetamidopropylamino)-6,3',6',2'',3''',4''''-hexa-O-benzoyl-1,3,2',2''',6''''-penta-N-trifluoroacetyl paromomycin (**35**).** The title compound was obtained as a yellowish solid (653 mg, 100 % yield) from amine **31** (600 mg, 0.34 mmol, 1.0 equiv), aldehyde **33** (116 mg, 0.69 mmol, 2.0 equiv) and Na(OAc)<sub>3</sub>BH (292 mg, 1.38 mmol, 4.0 equiv) by following General Procedure B. The crude product **35** was used in further steps without

additional purification.



### General Procedure C for trifluoroacetylation of amines **34** and **35**.

An oven-dried 50 mL round-bottom flask was cooled under an argon atmosphere and charged with amine **34** and **35** (1.0 equiv), followed by anhydrous DCM (5 mL/0.1 mmol of the amine). The clear solution was cooled to 0 °C (crushed ice) and trifluoroacetic anhydride (4.0–5.0 equiv) was added dropwise within 5 min. The resulting yellowish solution was stirred at 0 °C for 30 min, then pyridine (2.0-2.5 equiv) was added dropwise within 5 min at 0 °C temperature. The yellowish solution was stirred at ambient temperature for 2 h and the reaction progress was monitored by UPLC-MS assay. Upon complete conversion water (1 mL) was added to the dark brownish solution and all volatiles were removed under reduced pressure. The crude product was diluted with aqueous HCl (0.5 M solution in water, 50 mL) and back-extracted with EtOAc (3×30 mL). Combined organic extracts were washed with brine (20 mL), dried over anhydrous Na<sub>2</sub>SO<sub>4</sub>, filtered through a silica gel pad and evaporated under reduced pressure. The residue was purified by reversed-phase preparative HPLC (XBridge® Prep C18 OBD™ column) using gradient elution from 70 % to 95 % MeCN in 0.1 % aqueous AcOH solution. The obtained product after chromatography and evaporation was dissolved in DCM (5 mL) and hexane (50 mL) was added. The formed pale yellow precipitate was filtered off, washed with hexane (30 mL) and dried under reduced pressure.

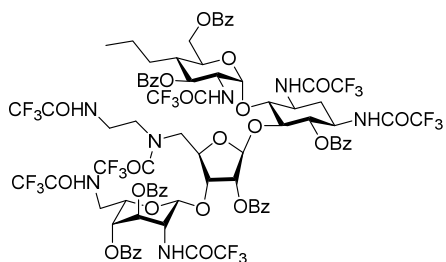

**4',5''-Dideoxy-4'-propyl-5''-(2-aminoethylamino)-6,3',6',2'',3''',4''''-hexa-O-benzoyl-hepta-N-trifluoroacetyl paromomycin (**36**)**. The title compound was obtained from amine **34** (648 mg, 0.34 mmol, 1.0 equiv), trifluoroacetic anhydride (0.19 mL, 1.38 mmol, 4.0 equiv) and pyridine (55  $\mu$ L, 0.69 mmol, 2.0 equiv) by following General Procedure C. Purification by

reversed-phase preparative HPLC afforded **36** as a white powder (224 mg, 33 % yield); analytical TLC on silica gel, 1:1 EtOAc/petroleum ether,  $R_f$ =0.31.

<sup>1</sup>H NMR (600 MHz, CD<sub>3</sub>OD)  $\delta$ : 8.29 – 8.24 (m, 2H), 8.13 – 8.10 (m, 2H), 8.08 – 7.98 (m, 4H), 7.80 – 7.77 (m, 1H), 7.74 – 7.59 (m, 7H), 7.55 – 7.44 (m, 9H), 7.28 – 7.21 (m, 2H), 7.00-6.95 (m, 1H), 6.94-6.90 (m, 1H), 6.90-6.86 (m, 1H), 6.01-5.97 (m, 1H), 5.47 – 5.40 (m, 1H), 5.29 (dd,  $J$  = 10.5, 9.3 Hz, 1H), 5.25-5.23 (m, 1H), 5.22 – 5.17 (m, 1H), 5.16 (d,  $J$  = 4.4 Hz, 1H), 5.10 – 5.07 (m, 1H), 4.69 – 4.63 (m, 1H), 4.61 – 4.54 (m, 2H), 4.47 – 4.43 (m, 1H), 4.42 – 4.36 (m, 2H), 4.36 – 4.29 (m, 2H), 4.18 – 4.03 (m, 4H), 4.01 – 3.93 (m, 1H), 3.79 (dt,  $J$  = 13.9, 5.2 Hz, 2H), 3.75 – 3.68 (m, 1H), 3.66 – 3.58 (m, 2H), 3.56 – 3.47 (m, 2H), 3.44 (dd,  $J$  = 13.9, 8.4 Hz, 1H), 2.38 – 2.26 (m, 1H), 2.12 (q,  $J$  = 12.8 Hz, 1H), 2.05 (dt,  $J$  = 12.8, 4.4 Hz, 1H), 1.48 – 1.35 (m, 3H),

1.31 – 1.23 (m, 1H), 0.78 (dt,  $J = 10.5, 6.9$  Hz, 3H) ppm, 6H exchangeable protons merge with H<sub>2</sub>O.  $[\alpha]_D^{23} +34.0$  (c 1.21, MeOH).

**<sup>13</sup>C{<sup>1</sup>H} NMR** (151 MHz, CD<sub>3</sub>OD)  $\delta$ : 167.9, 167.6, 167.2, 166.2, 166.1, 165.7, 159.8 – 157.6 (7 $\times$ COCF<sub>3</sub>), 135.1, 135.0, 134.6, 134.5, 134.4, 131.3, 131.1, 131.0, 130.8, 130.8, 130.7, 130.7, 130.6, 130.0, 129.9, 129.8, 129.7, 129.7, 129.6, 129.5, 129.3, 129.2, 129.0, 118.6 – 115.7 (7 $\times$ CF<sub>3</sub>), 110.2, 98.4, 97.8, 85.9, 79.5, 78.4, 78.0, 77.8, 77.6, 76.8, 76.2, 75.7, 74.2, 73.5, 73.1, 71.4, 69.9, 68.0, 65.0, 54.1, 50.6, 49.6, 48.3, 46.9, 42.7, 40.5, 37.7, 32.3, 30.4, 20.8, 14.6 ppm.

**HRMS** (ESI/Q-TOF):  $m/z$  [M+Na]<sup>+</sup> Calcd for C<sub>84</sub>H<sub>74</sub>N<sub>7</sub>O<sub>25</sub>F<sub>21</sub>Na 2002.4297; Found 2002.4412.

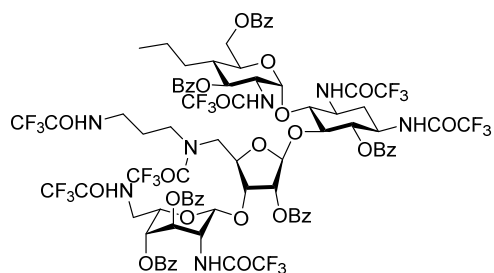

**4',5''-Dideoxy-4'-propyl-5''-(3-aminoethylamino)-1,3-diaminopropane)-6,3',6',2'',3''',4''''-hexa-O-benzoyl-hepta-N-trifluoroacetyl paromomycin (37).** The title compound was obtained from amine **35** (653 mg, 0.34 mmol, 1.0 equiv), trifluoroacetic anhydride (0.19 mL, 1.38 mmol, 4.0 equiv) and pyridine (55  $\mu$ L, 0.69 mmol, 2.0 equiv) by following General

Procedure C. Purification by reversed-phase preparative HPLC afforded **37** as a white powder (232 mg, 34 % yield); analytical TLC on silica gel, 1:1 EtOAc/petroleum ether,  $R_f=0.31$ .  $[\alpha]_D^{23} +29.0$  (c 1.14, MeOH).

**<sup>1</sup>H NMR** (600 MHz, CDCl<sub>3</sub>)  $\delta$ : 8.63 (dd,  $J = 9.0, 3.6$  Hz, 1H), 8.27 – 8.18 (m, 2H), 8.14 – 8.07 (m, 2H), 7.96 – 7.91 (m, 4H), 7.77 – 7.70 (m, 2H), 7.68 – 7.61 (m, 4H), 7.60 – 7.49 (m, 6H), 7.49 – 7.40 (m, 8H), 7.32 (t,  $J = 6.2$  Hz, 1H), 7.25 – 7.22 (m, 1H, overlapped with CHCl<sub>3</sub>), 6.84 (d,  $J = 7.6$  Hz, 1H), 6.79 (t, 1H,  $J=7.0$  Hz), 6.74 (t,  $J = 7.6$  Hz, 2H), 6.60 (d,  $J = 9.7$  Hz, 1H), 5.94 (d,  $J = 4.0$  Hz, 1H), 5.42 (s, 1H), 5.37 – 5.30 (m, 2H), 5.20 (t,  $J = 9.9$  Hz, 1H), 5.15 (t,  $J = 2.7$  Hz, 1H), 5.04 – 4.97 (m, 2H), 4.66 (dd,  $J = 12.1, 3.6$  Hz, 1H), 4.53 (dd,  $J = 12.1, 5.1$  Hz, 1H), 4.46 (dt,  $J = 10.2, 4.0$  Hz, 1H), 4.39 (dd,  $J = 8.0, 4.3$  Hz, 1H), 4.33 – 4.24 (m, 2H), 4.24 – 4.15 (m, 4H), 4.13-4.07 (m, 2H), 3.99 – 3.91 (m, 2H), 3.62 (p,  $J = 7.6$  Hz, 1H), 3.57 – 3.50 (m, 1H), 3.36 (dd,  $J = 13.9, 3.6$  Hz, 1H), 3.23 – 3.09 (m, 3H), 2.35 (dt,  $J = 13.2, 4.4$  Hz, 1H), 2.25-2.17 (m, 1H), 2.00 – 1.94 (m, 1H), 1.87 – 1.82 (m, 1H), 1.67 (q,  $J = 12.7$  Hz, 1H), 1.45 – 1.37 (m, 3H), 1.35-1.27 (m, 1H), 0.80 (t,  $J = 6.8$  Hz, 3H) ppm, 6H exchangeable protons merge with H<sub>2</sub>O.

**<sup>13</sup>C{<sup>1</sup>H} NMR** (151 MHz, CDCl<sub>3</sub>)  $\delta$ : 167.8, 166.8, 166.7, 164.7, 164.6, 164.4, 158.8 – 155.8 (7 $\times$ COCF<sub>3</sub>), 134.4, 134.1, 134.0, 133.8, 133.7, 133.6, 130.4, 130.0, 129.9, 129.7, 129.7, 129.6, 129.6, 129.1, 129.0, 128.9, 128.9, 128.8, 128.7, 128.4, 128.1, 128.0, 127.8, 126.9, 117.4 – 114.2 (7 $\times$ CF<sub>3</sub>), 109.0, 97.6, 96.0, 85.2, 79.0,

75.1, 74.9, 74.7, 73.7, 71.8, 70.2, 69.6, 66.6, 65.6, 53.4, 49.5, 48.9, 47.4, 45.2, 43.7, 42.7, 41.5, 39.5, 36.4, 32.1, 29.2, 29.0, 26.1, 20.4, 14.4 ppm.

**HRMS** (ESI/Q-TOF):  $m/z$   $[M+Na]^+$  Calcd for  $C_{85}H_{76}N_7O_{25}F_{21}Na$  2016.4453; Found 2016.4429.

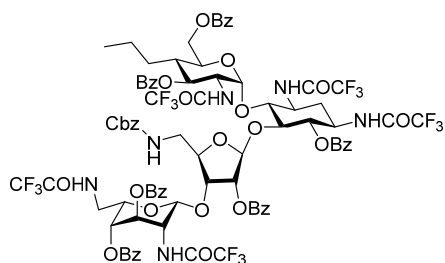

**4',5''-Dideoxy-4'-propyl-5''-(O-benzylcarbamoyl)-6,3',6',2'',3''',4''''-hexa-O-benzoyl-1,3,2',2''',6''''-penta-N-trifluoroacetyl paromomycin (**38**).**

A stirred solution of 5''-deoxy-5''-amino paromomycin derivative **31** (515 mg, 0.30 mmol, 1.0 equiv) in anhydrous DCM (20 mL) was cooled to 0 °C (crushed ice bath) and Cbz-Cl (126  $\mu$ L, 0.89 mmol, 3.0 equiv) was added dropwise over 5 min. The resulting yellowish solution was stirred at 0 °C for 1 h followed by dropwise addition (over 5 min) of pyridine (71  $\mu$ L, 0.89 mmol, 3.0 equiv). The resulting yellow solution was stirred at 0 °C for 1 h, then warmed up to room temperature and stirring was continued for additional 2 h. The reaction progress was monitored by UPLC-MS assay. The yellowish solution was diluted with water (50 mL) and back-extracted with DCM (2 $\times$ 30 mL). Combined organic extracts were washed with brine (50 mL), dried over anhydrous  $Na_2SO_4$  and evaporated under reduced pressure. The crude yellow oil was dissolved in DCM (5 mL) and hexane (50 mL) was added to the solution. The formed beige precipitate was collected by suction filtration and dried under reduced pressure to give product **38** (520 mg, 94 % yield) as a white powder. An aliquot of **38** (50 mg) was purified by reversed-phase preparative HPLC (XBridge® Prep C18 OBD™ column) using gradient elution from 60 % to 95 % MeCN in 0.1 % aqueous AcOH solution. Product-containing fractions were detected by TLC and ESI-MS. Combined fractions were concentrated under reduced pressure to afford pure material; analytical TLC on silica gel, 1:1 EtOAc/petroleum ether,  $R_f=0.62$ .  $[\alpha]_D^{23} +75.7$  (c 0.53,  $CHCl_3$ ).

**$^1H$  NMR** (600 MHz,  $CDCl_3$ )  $\delta$ : 8.66 (t,  $J = 5.6$  Hz, 1H), 8.13 – 8.03 (m, 4H), 7.99 – 7.95 (m, 2H), 7.94 – 7.91 (m, 2H), 7.91 – 7.83 (m, 2H), 7.74 – 7.67 (m, 2H), 7.65 – 7.60 (m, 2H), 7.60 – 7.56 (m, 2H), 7.51 – 7.45 (m, 5H), 7.44 – 7.39 (m, 4H), 7.37 – 7.29 (m, 5H), 7.28 – 7.27 (m, 1H), 7.26 – 7.20 (m, 3H), 7.14 – 7.04 (m, 2H), 6.87 – 6.81 (m, 1H), 6.81 – 6.73 (m, 1H), 6.02 – 5.91 (m, 1H), 5.67 (d,  $J = 3.7$  Hz, 1H), 5.39 – 5.31 (m, 2H), 5.29 – 5.21 (m, 2H), 5.15 – 5.08 (m, 3H), 5.01 (t,  $J = 10.0$  Hz, 1H), 4.81 (s, 1H), 4.59 – 4.50 (m, 2H), 4.42 – 4.37 (m, 1H), 4.33 – 4.28 (m, 1H), 4.19 – 4.15 (m, 1H), 4.14 – 4.09 (m, 2H), 4.09 – 4.05 (m, 2H), 4.01 – 3.94 (m, 2H), 3.78 – 3.71 (m, 1H), 3.62 (ddd,  $J = 14.2, 6.1, 2.9$  Hz, 1H), 3.37 (ddd,  $J = 14.5, 8.8, 5.4$  Hz, 1H), 3.33

– 3.24 (m, 1H), 2.30 – 2.22 (m, 1H), 2.09 – 2.02 (m, 1H), 1.58 – 1.51 (m, 1H), 1.44 – 1.38 (m, 2H), 0.78 (t, J = 7.0 Hz, 3H).

**<sup>13</sup>C{<sup>1</sup>H} NMR** (151 MHz, CDCl<sub>3</sub>) δ: 167.2, 166.9, 165.7, 164.9, 164.1, 163.1, 157.8, 157.7-156.5 (5×COCF<sub>3</sub>), 136.4, 134.4, 134.2, 134.2, 134.0, 133.9, 133.7, 130.3, 129.9, 129.9, 129.8, 129.6, 129.0, 128.9, 128.8, 128.8, 128.7, 128.7, 128.4, 128.3, 128.3, 128.2, 127.9, 127.4, 117.0-114.8 (5×CF<sub>3</sub>), 99.1, 96.2, 81.3, 78.2, 77.4, 77.2, 76.9, 75.5, 74.2, 72.7, 70.8, 70.7, 69.0, 67.3, 67.1, 64.8, 53.8, 49.7, 49.5, 48.7, 42.0, 41.0, 31.5, 29.4, 19.8, 19.6, 14.4 ppm.

**HRMS** (ESI/Q-TOF): *m/z* [M+H]<sup>+</sup> Calcd for C<sub>86</sub>H<sub>77</sub>N<sub>6</sub>O<sub>25</sub>F<sub>15</sub>Na 1901.4597; Found 1901.4622.

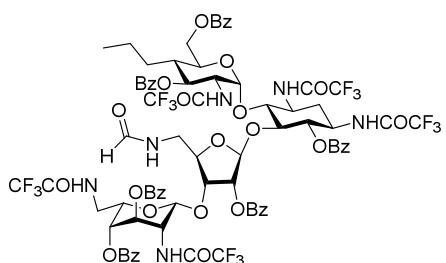

**4',5''-Dideoxy-4'-propyl-5''-formamido-6,3',6',2'',3''',4''''-hexa-O-benzoyl-1,3,2',2''',6'''-penta-N-trifluoroacetyl paromomycin (39).**

A stirred solution of 5''-deoxy-5''-amino paromomycin derivative **31** (500 mg, 0.29 mmol, 1.0 equiv) in anhydrous DCM (20 mL) was treated with formyl acetate (113 μL, 1.43 mmol, 5 equiv) at ambient temperature. The resulting yellowish solution was stirred at ambient temperature overnight. The reaction progress was monitored by UPLC-MS assay. The yellowish solution was evaporated under reduced pressure. The crude yellow oil was purified by reversed-phase preparative HPLC (XBridge® Prep C18 OBD™ column) using gradient elution from 60 % to 95 % MeCN in 0.1 % aqueous AcOH solution. Product-containing fractions were detected by TLC and ESI-MS. Combined fractions were concentrated under reduced pressure to give product **39** (290 mg, 57 % yield) as a white powder; analytical TLC on silica gel, 1:1 EtOAc/petroleum ether, *R<sub>f</sub>*=0.56. [ $\alpha$ ]<sub>D</sub><sup>23</sup> +60.4 (*c* 0.49, CHCl<sub>3</sub>).

**<sup>1</sup>H NMR** (600 MHz, CDCl<sub>3</sub>) δ: 9.02 (s, 1H), 8.19 (s, 1H), 8.15 – 8.05 (m, 4H), 8.02 – 7.96 (m, 2H), 7.94 – 7.90 (m, 2H), 7.88 – 7.81 (m, 2H), 7.74 – 7.68 (m, 2H), 7.68 – 7.64 (m, 2H), 7.64 – 7.57 (m, 3H), 7.57 – 7.39 (m, 9H), 7.35 – 7.30 (m, 1H), 7.29 – 7.26 (m, 2H), 7.16 (t, J = 7.4 Hz, 1H), 7.13 – 7.04 (m, 2H), 6.91 – 6.75 (m, 3H), 5.72 (d, J = 3.6 Hz, 1H), 5.42 – 5.33 (m, 2H), 5.30 – 5.25 (m, 1H), 5.23 (t, J = 3.0 Hz, 1H), 5.10 (d, J = 4.6 Hz, 1H), 5.02 (t, J = 9.9 Hz, 1H), 4.78 – 4.71 (m, 1H), 4.64 (dd, J = 12.2, 6.1 Hz, 1H), 4.58 – 4.52 (m, 1H), 4.42 – 4.34 (m, 1H), 4.23 – 3.95 (m, 9H), 3.77 – 3.67 (m, 2H), 3.53 – 3.46 (m, 1H), 3.41 – 3.34 (m, 1H), 2.30 – 2.22 (m, 1H), 2.15 – 2.09 (m, 1H), 1.64 – 1.56 (m, 1H), 0.80 (t, J = 7.0 Hz, 3H).

$^{13}\text{C}\{^1\text{H}\}$  NMR (151 MHz,  $\text{CDCl}_3$ )  $\delta$ : 167.1, 166.8, 166.8, 165.5, 164.8, 164.1, 162.5, 158.2-156.6 ( $5\times\text{COCF}_3$ ), 134.3, 134.1, 134.0, 133.9, 133.6, 130.2, 129.7, 129.7, 129.7, 129.4, 129.0, 128.8, 128.7, 128.7, 128.7, 128.6, 128.2, 128.0, 128.0, 127.3, 116.9-114.4 ( $5\times\text{CF}_3$ ), 107.3, 98.0, 95.8, 80.6, 77.2, 77.0, 76.8, 74.8, 74.0, 72.9, 70.9, 70.6, 69.0, 67.0, 64.6, 53.7, 49.3, 48.3, 41.9, 40.8, 38.2, 31.4, 29.4, 19.8, 14.3 ppm.

HRMS (ESI/Q-TOF):  $m/z$   $[\text{M}+\text{H}]^+$  Calcd for  $\text{C}_{79}\text{H}_{72}\text{N}_6\text{O}_{24}\text{F}_{15}$  1773.4358; Found 1773.4353.

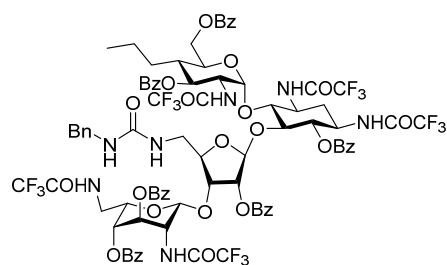

**4',5''-Dideoxy-4'-propyl-5''-(N-benzylureido)-6,3',6',2'',3''',4''''-hexa-O-benzoyl-1,3,2',2''',6'''-penta-N-trifluoroacetyl paromomycin (40).**

A stirred solution of 5''-deoxy-5''-amino paromomycin derivative **31** (720 mg, 0.41 mmol, 1.0 equiv) in anhydrous DCM (25 mL) was treated with benzyl isocyanate (130  $\mu\text{L}$ , 1.03 mmol, 2.5 equiv) at ambient temperature. The resulting yellowish solution was stirred at ambient temperature overnight. The reaction progress was monitored by UPLC-MS assay. The yellowish solution was diluted with water (50 mL) and back-extracted with DCM ( $3\times 30$  mL). Combined organic extracts were washed with brine (30 mL), dried over anhydrous  $\text{Na}_2\text{SO}_4$  and evaporated under reduced pressure. The crude yellow oil was purified by reversed-phase preparative HPLC (XBridge<sup>®</sup> Prep C18 OBD<sup>™</sup> column) using gradient elution from 60 % to 95 % MeCN in 0.1 % aqueous AcOH solution. Product-containing fractions were detected by TLC and ESI-MS. Combined fractions were concentrated under reduced pressure to give product **40** (350 mg, 45 % yield) as a white powder; analytical TLC on silica gel, 1:1 EtOAc/petroleum ether,  $R_f=0.59$ .  $[\alpha]_{\text{D}}^{23} +44.5$  ( $c$  0.31,  $\text{CHCl}_3$ ).

$^1\text{H}$  NMR (600 MHz,  $\text{CDCl}_3$ )  $\delta$ : 9.78 (s, 1H), 8.12 – 8.08 (m, 2H), 8.06 – 8.03 (m, 2H), 7.96 – 7.92 (m, 2H), 7.92 – 7.89 (m, 2H), 7.88 – 7.82 (m, 2H), 7.71 – 7.65 (m, 3H), 7.63 (t,  $J = 7.5$  Hz, 1H), 7.60 – 7.54 (m, 4H), 7.50 – 7.46 (m, 3H), 7.44 – 7.35 (m, 6H), 7.32 – 7.26 (m, 7H), 7.26 – 7.21 (m, 3H), 7.10 – 7.03 (m, 2H), 6.81 – 6.61 (m, 2H), 5.84 (d,  $J = 3.7$  Hz, 1H), 5.62 (dd,  $J = 8.5, 3.8$  Hz, 1H), 5.44 (t,  $J = 6.0$  Hz, 1H), 5.33 – 5.27 (m, 2H), 5.26 – 5.22 (m, 2H), 5.11 (d,  $J = 5.0$  Hz, 1H), 4.86 (t,  $J = 9.9$  Hz, 1H), 4.78 – 4.73 (m, 1H), 4.69 – 4.63 (m, 1H), 4.55 – 4.48 (m, 2H), 4.41 – 4.33 (m, 3H), 4.20 – 4.14 (m, 2H), 4.09 – 4.03 (m, 3H), 3.99 – 3.93 (m, 2H), 3.85 (t,  $J = 9.5$  Hz, 1H), 3.68 (dd,  $J = 13.9, 5.7$  Hz, 1H), 3.39 – 3.32 (m, 1H), 3.13 – 3.01 (m, 1H), 2.29 (dt,  $J = 13.6, 4.6$  Hz, 1H), 2.03 – 1.99 (m, 1H), 0.87 – 0.83 (m, 3H).

$^{13}\text{C}\{^1\text{H}\}$  NMR (151 MHz,  $\text{CDCl}_3$ )  $\delta$ : 167.6, 167.2, 166.7, 165.3, 164.9, 164.0, 159.1, 158.7-157.0 ( $5\times\text{COCF}_3$ ), 139.5, 134.5, 134.3, 134.1, 134.0, 133.6, 130.2, 129.9, 129.9, 129.8, 129.8, 129.6, 129.2, 128.9, 128.8,

128.8, 128.8, 128.7, 128.7, 128.3, 128.2, 128.2, 127.4, 127.3, 127.2, 117.1-114.4 (5×CF<sub>3</sub>), 107.2, 99.7, 95.1, 81.9, 81.4, 79.5, 77.4, 77.2, 76.9, 75.8, 74.4, 73.0, 70.9, 70.8, 68.8, 65.1, 53.6, 49.7, 48.9, 48.7, 44.3, 42.4, 42.1, 41.5, 31.7, 29.5, 29.2, 20.5, 19.6, 14.4 ppm.

**HRMS** (ESI/Q-TOF): *m/z* [M+H]<sup>+</sup> Calcd for C<sub>86</sub>H<sub>79</sub>N<sub>7</sub>O<sub>24</sub>F<sub>15</sub> 1878.4937; Found 1878.4929.

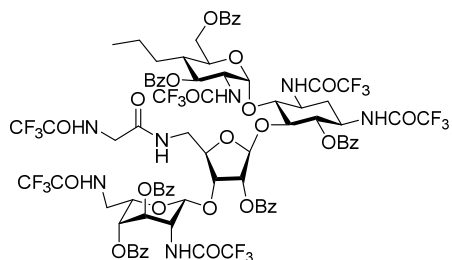

**4',5''-Dideoxy-4'-propyl-5''-(N-trifluoroacetyl)glycinamido)-6,3',6',2'',3''',4''''-hexa-O-benzoyl-1,3,2',2''',6''''-penta-N-trifluoroacetyl paromomycin (41).** A stirred solution of (2,2,2-

trifluoroacetyl)glycine (34 mg, 0.20 mmol, 1.4 equiv), HATU (82 mg, 0.22 mmol, 1.5 equiv) in anhydrous DMF (3 mL) at ambient temperature was treated with 4-methylmorpholine (40 μL, 0.36 mmol, 2.5 equiv). The resulting yellowish solution was stirred at ambient temperature for 1 h followed by addition of 5''-deoxy-5''-amino paromomycin **31** (250 mg, 0.14 mmol, 1.0 equiv) solution in anhydrous DMF (2 mL). The resulting yellowish solution was stirred at ambient temperature overnight. The reaction progress was monitored by UPLC-MS assay. The yellowish solution was diluted with saturated aqueous NaHCO<sub>3</sub> solution (50 mL) and back-extracted with DCM (3×30 mL). Combined organic extracts were washed with brine (30 mL), dried over anhydrous Na<sub>2</sub>SO<sub>4</sub> and evaporated under reduced pressure. The crude yellow oil was purified by reversed-phase preparative HPLC (XBridge® Prep C18 OBD™ column) using gradient elution from 60 % to 95 % MeCN in 0.1 % aqueous AcOH solution. Product-containing fractions were detected by TLC and ESI-MS. Combined fractions were concentrated under reduced pressure to give product **41** (145 mg, 53 % yield) as a white powder; analytical TLC on silica gel, 1:1 EtOAc/petroleum ether, *R<sub>f</sub>*=0.54. [α]<sub>D</sub><sup>23</sup> +49.9 (c 0.33, MeOH).

**<sup>1</sup>H NMR** (600 MHz, CD<sub>3</sub>OD) δ: 8.30 – 8.23 (m, 2H), 8.13 – 8.05 (m, 4H), 8.05 – 7.99 (m, 2H), 7.80 – 7.73 (m, 3H), 7.71 – 7.66 (m, 2H), 7.66 – 7.59 (m, 3H), 7.56 – 7.51 (m, 2H), 7.51 – 7.42 (m, 7H), 7.27 – 7.21 (m, 2H), 7.06 – 7.01 (m, 1H), 6.98 – 6.91 (m, 2H), 6.03 (d, *J* = 4.0 Hz, 1H), 5.48 (t, *J* = 10.7 Hz, 1H), 5.34 (s, 1H), 5.33 – 5.26 (m, 2H), 5.20 – 5.12 (m, 3H), 4.66 – 4.53 (m, 3H), 4.47 – 4.43 (m, 1H), 4.39 – 4.28 (m, 3H), 4.23 (dd, *J* = 8.5, 4.5 Hz, 1H), 4.16 – 4.03 (m, 4H), 3.98 (dd, *J* = 14.2, 2.8 Hz, 1H), 3.91 – 3.83 (m, 2H), 3.57 (d, *J* = 6.5 Hz, 2H), 3.19 (dd, *J* = 14.2, 7.6 Hz, 1H), 2.44 – 2.36 (m, 1H), 2.20 – 2.12 (m, 1H), 2.07 – 2.01 (m, 1H), 1.47 – 1.40 (m, 2H), 1.35 – 1.22 (m, 2H), 0.78 (t, *J* = 6.9 Hz, 3H) ppm, 7H exchangeable protons merge with H<sub>2</sub>O.

**$^{13}\text{C}\{^1\text{H}\}$  NMR** (151 MHz,  $\text{CD}_3\text{OD}$ )  $\delta$ : 170.4, 167.9, 167.6, 167.3, 166.5, 166.1, 165.6, 160.2-158.0 ( $6\times\text{COCF}_3$ ), 135.0, 134.9, 134.6, 134.6, 134.5, 134.3, 131.3, 131.1, 131.1, 131.0, 130.8, 130.7, 130.7, 130.5, 130.0, 129.9, 129.8, 129.6, 129.6, 129.6, 129.3, 129.3, 129.1, 118.9-115.6 ( $6\times\text{CF}_3$ ), 110.0, 98.9, 97.6, 85.9, 81.3, 78.8, 77.8, 76.9, 76.5, 73.9, 72.9, 71.4, 69.8, 67.8, 64.9, 54.5, 50.6, 50.2, 49.6, 49.4, 49.2, 49.0, 48.8, 48.6, 48.4, 43.6, 43.0, 42.6, 40.9, 32.3, 30.5, 20.8, 14.7 ppm.

**HRMS** (ESI/Q-TOF):  $m/z$   $[\text{M}+\text{Na}]^+$  Calcd for  $\text{C}_{82}\text{H}_{73}\text{N}_7\text{O}_{25}\text{F}_{18}\text{Na}$  1920.4266; Found 1920.4257.

#### **General Procedure D for global deprotection of trifluoroacetamides 36, 37, 39 and 41.**

An oven-dried 20 mL pressure vial was cooled under an argon atmosphere and charged with trifluoroacetamides **36**, **37**, **39**, or **41** (1.0 equiv). Anhydrous MeOH (4 mL/0.1 mmol of the starting material) was added and the resulting clear solution was treated under argon atmosphere with  $\text{Mg}(\text{OMe})_2$  (7-8 % solution in anhydrous methanol; 23.0-30.0 equiv). After stirring for 24 h at 65 °C temperature (the reaction progress was monitored by UPLC-MS assay), the resulting white slurry was concentrated to dryness under reduced pressure. Anhydrous  $\text{Et}_2\text{O}$  (10 mL) was added to the white residue and the resulting white suspension was sonicated for 2 min in an ultrasonic bath, whereupon the resulting white suspension was centrifuged for 10 min at 2150 rpm. The colorless clear supernatant was decanted and fresh anhydrous  $\text{Et}_2\text{O}$  (10 mL) was added to the white residue. The sonication/centrifugation sequence was repeated two more times. The resulting white precipitate was dried under reduced pressure. The residue was taken up in water (10 mL/0.1 mmol of the starting material), stirred and treated with  $\text{Ba}(\text{OH})_2$  (20.0 equiv) at ambient temperature. The resulting white slurry was stirred and heated to 80 °C temperature for 18 h and the reaction progress was monitored by UPLC-MS assay. The white reaction suspension was cooled to 0 °C (crushed ice bath) and dry ice was added portionwise until pH 7–8. The resulting mixture was centrifuged for 10 min at 2150 rpm. The clear supernatant was decanted and fresh MeOH (10 mL) was added to the white precipitate. The mixture was sonicated for 2 min in an ultrasonic bath. Fresh MeOH (10 mL) was added once again and the sonication/centrifugation sequence was repeated two more times. The combined supernatant solutions were concentrated under reduced pressure. The crude product was diluted with MeOH (15 mL), the resulting suspension was filtered, and the filter cake was washed with MeOH. The combined filtrates were concentrated under reduced pressure. The residue was purified by reversed-phase preparative HPLC (XBridge® BEH Prep OBD™ Amide column) using gradient elution from 95:5 A:B to 10:90 A:B (eluent A - 0.05 % solution of AcOH in MeCN;

eluent B - 0.05 % solution of AcOH in water). Product-containing fractions (identified by ninhydrin stain test and ESI-MS) were combined and concentrated. The residue was treated with glacial acetic acid (0.5 mL), followed by addition of MeCN (5 mL). The formed white solid was dried under reduced pressure.

#### **General Procedure E for global deprotection of trifluoroacetamides **38** and **40**.**

An oven-dried 20 mL pressure vial was cooled under an argon atmosphere and charged with trifluoroacetamides **38** or **40** (1.0 equiv). Anhydrous MeOH (4 mL/0.1 mmol of the starting material) was added and the resulting clear solution was treated under argon atmosphere with Mg(OMe)<sub>2</sub> (7-8 % solution in anhydrous methanol; 23.0-30.0 equiv). After stirring for 24 h at 65 °C temperature (the reaction progress was monitored by UPLC-MS assay), the resulting white slurry was concentrated to dryness under reduced pressure. Anhydrous Et<sub>2</sub>O (10 mL) was added to the white residue and the resulting white suspension was sonicated for 2 min in an ultrasonic bath, whereupon the resulting white suspension was centrifuged for 10 min at 2150 rpm. The colorless clear supernatant was decanted and fresh anhydrous Et<sub>2</sub>O (10 mL) was added to the white residue. The sonication/centrifugation sequence was repeated two more times. The resulting white precipitate was dried under reduced pressure. The residue was taken up in water (10 mL/0.1 mmol of the starting material), stirred and treated with Ba(OH)<sub>2</sub> (20.0 equiv) at ambient temperature. The resulting white slurry was stirred and heated to 80 °C temperature for 18 h and the reaction progress was monitored by UPLC-MS assay. The white reaction suspension was cooled to 0 °C (crushed ice bath) and dry ice was added portionwise until pH 7–8. The resulting mixture was centrifuged for 10 min at 2150 rpm. The clear supernatant was decanted and fresh MeOH (10 mL) was added to the white precipitate. The mixture was sonicated for 2 min in an ultrasonic bath. Fresh MeOH (10 mL) was added once again and the sonication/centrifugation sequence was repeated two more times. The combined supernatant solutions were concentrated under reduced pressure. The crude product was diluted with MeOH (15 mL), the resulting suspension was filtered, and the filter cake was washed with MeOH. The combined filtrates were concentrated under reduced pressure. The residue was diluted with AcOH (16 mL) and water (4 mL), and to the well-stirred solution was added 10 % Pd on carbon (1.0 equiv) at ambient temperature to a stirred solution. The reaction mixture was stirred under 5 atm of hydrogen at ambient temperature for 18 h, and progress of the reaction was monitored by UPLC-MS assay. The black suspension was filtered through the pad of *Celite*<sup>®</sup>, the filter plug was washed with 50% AcOH in water and the filtrate was evaporated under reduced pressure. The residue was purified by reversed-phase preparative HPLC (XBridge<sup>®</sup> BEH Prep OBD<sup>™</sup> Amide



column) using gradient elution from 95:5 A:B to 10:90 A:B (eluent A - 0.05 % solution of AcOH in MeCN; eluent B - 0.05 % solution of AcOH in water). Product-containing fractions (identified by ninhydrin stain test and ESI-MS) were combined and concentrated. The residue was treated with glacial acetic acid (0.5 mL), followed by addition of MeCN (5 mL). The formed white solid was dried under reduced pressure.

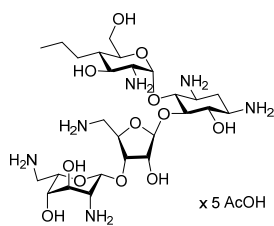

**5''-Amino-4',5''-dideoxy-4'-propyl paromomycin pentaacetate (8).** The title compound was obtained from paromomycin derivative **38** (550 mg, 0.29 mmol, 1.0 equiv), Mg(OMe)<sub>2</sub> (7-8 % solution in anhydrous methanol; 10.0 mL, 7.02 mmol, 24.0 equiv), barium hydroxide (1.0 g, 5.85 mmol, 20.0 equiv) and Pd/C (10 mol% on carbon; 247 mg, 0.23 mmol, 1 equiv) by following General Procedure E.

Purification by reversed-phase preparative HPLC, followed by treatment with glacial acetic acid afforded the hexaacetate salt of **8** as a white amorphous solid (75.0 mg, 32 % yield).  $[\alpha]_D^{23} +39.1$  (c 0.81, D<sub>2</sub>O).

**<sup>1</sup>H NMR** (600 MHz, D<sub>2</sub>O)  $\delta$ : 5.78 (1H, d, J=3.8 Hz) 5.47 (1H, s) 5.33 (1H, s) 4.56 (1H, t, J=5.9 Hz) 4.48 (1H, d, J=5.2 Hz) 4.35 (1H, t, J=5.2 Hz) 4.34-4.30 (1H, m) 4.26 (1H, t, J=3.1 Hz) 4.04-3.93 (3H, m) 3.93-3.84 (3H, m) 3.78-3.72 (2H, m) 3.64-3.60 (1H, m) 3.52-3.41 (4H, m) 3.41-3.27 (3H, m) 2.44 (1H, dt, J=12.1, 3.4 Hz) 1.97 (15H, s) 1.82 (1H, q, J=12.7 Hz) 1.73-1.67 (1H, m) 1.56-1.47 (2H, m) 1.41-1.27 (2H, m) 0.91 (3H, t, J=7.2 Hz) ppm, 24H exchangeable protons merge with H<sub>2</sub>O.

**<sup>13</sup>C{<sup>1</sup>H} NMR** (151 MHz, D<sub>2</sub>O)  $\delta$ : 108.8, 95.3, 95.1, 83.0, 77.4, 77.0, 76.8, 74.0, 73.0, 72.1, 70.2, 67.6, 67.4, 67.1, 61.1, 55.2, 50.8, 50.2, 50.0, 49.2, 42.1, 41.7, 40.4, 28.5, 27.9, 22.5, 18.6, 13.7 ppm.

**HRMS** (ESI/Q-TOF):  $m/z$  [M+H]<sup>+</sup> Calcd for C<sub>26</sub>H<sub>53</sub>N<sub>6</sub>O<sub>12</sub> 641.3721; Found 641.3732.

**Elemental analysis:** Anal. Calcd for C<sub>28</sub>H<sub>57</sub>N<sub>7</sub>O<sub>12</sub>•5AcOH•4H<sub>2</sub>O•4H<sub>2</sub>CO<sub>3</sub>: C, 38.10; H, 7.03; N, 6.66; Found C, 38.25; H, 6.80; N, 6.67.

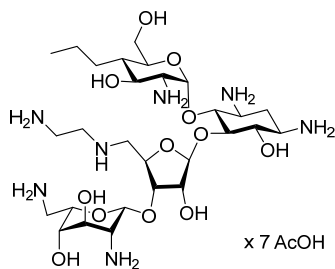

**5''-(2-Aminoethylamino)-4',5''-dideoxy-4'-propyl paromomycin heptaacetate (9).** The title compound was obtained from paromomycin derivative **36** (223 mg, 0.11 mmol, 1.0 equiv), Mg(OMe)<sub>2</sub> (7-8 % solution in anhydrous methanol; 3.7 mL, 2.6 mmol, 23.0 equiv) and barium hydroxide (386 mg, 2.25 mmol, 20.0 equiv) by following General Procedure D.

Purification by reversed-phase preparative HPLC, followed by treatment with glacial acetic acid afforded the heptaacetate salt of **9** as a white amorphous solid (25.0 mg, 20 % yield).  $[\alpha]_D^{23} +38.5$  (c 1.50, D<sub>2</sub>O).

**<sup>1</sup>H NMR** (600 MHz, D<sub>2</sub>O) δ: 5.71 (d, *J* = 3.9 Hz, 1H), 5.39 (d, *J* = 3.3 Hz, 1H), 5.32 (d, *J* = 1.8 Hz, 1H), 4.45 (t, *J* = 5.3 Hz, 1H), 4.38 (dd, *J* = 5.3, 3.3 Hz, 1H), 4.34 – 4.30 (m, 1H), 4.27 – 4.21 (m, 2H), 3.99 – 3.86 (m, 5H), 3.85 – 3.83 (m, 1H), 3.76 – 3.68 (m, 2H), 3.62 – 3.59 (m, 1H), 3.49 – 3.38 (m, 3H), 3.37 – 3.29 (m, 2H), 3.18 (t, *J* = 6.9 Hz, 2H), 3.10 (dd, *J* = 12.9, 3.8 Hz, 1H), 3.05 – 3.00 (m, 2H), 2.94 (dd, *J* = 12.9, 8.5 Hz, 1H), 2.43 (dt, *J* = 12.7, 4.2 Hz, 1H), 1.80 (q, *J* = 12.7 Hz, 1H), 1.71 – 1.64 (m, 1H), 1.55 – 1.45 (m, 2H), 1.41 – 1.26 (m, 2H), 0.90 (t, *J* = 7.2 Hz, 3H) ppm, 26H exchangeable protons merge with H<sub>2</sub>O.

**<sup>13</sup>C{<sup>1</sup>H} NMR** (151 MHz, D<sub>2</sub>O) δ: 109.3, 96.1, 95.4, 83.9, 79.7, 78.0, 77.4, 74.0, 73.2, 72.1, 70.3, 67.6, 67.3, 67.0, 61.2, 55.3, 50.9, 50.8, 49.7, 49.2, 45.5, 42.3, 40.4, 37.9, 28.7, 28.0, 18.6, 13.7 ppm.

**HRMS** (ESI/Q-TOF): *m/z* [M+H]<sup>+</sup> Calcd for C<sub>28</sub>H<sub>58</sub>N<sub>7</sub>O<sub>12</sub> 684,4143; Found 684,4145.

**Elemental analysis:** Anal. Calcd for C<sub>28</sub>H<sub>57</sub>N<sub>7</sub>O<sub>12</sub>•7AcOH•2H<sub>2</sub>O: C, 44,24; H, 7,87; N, 8,60; Found C, 44,24; H, 7,68; N, 8,36.

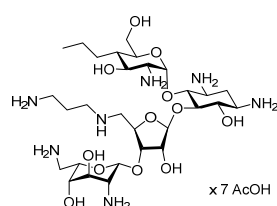

**5''-(3-Aminopropylamino)-4',5''-dideoxy-4'-propyl paromomycin heptaacetate**

**(10).** The title compound was obtained from paromomycin derivative **37** (231 mg, 0.12 mmol, 1.0 equiv), Mg(OMe)<sub>2</sub> (7-8 % solution in anhydrous methanol; 4.4 mL, 3.1 mmol, 27.0 equiv) and barium hydroxide (397 mg, 2.31 mmol, 20.0 equiv) by following General Procedure D. Purification by reversed-phase preparative HPLC was followed by treatment with glacial acetic acid to afford the heptaacetate salt of **10** as a white amorphous solid (28.9 mg, 22 % yield). [ $\alpha$ ]<sub>D</sub><sup>23</sup> +49.8 (c 1.52, D<sub>2</sub>O).

**<sup>1</sup>H NMR** (600 MHz, D<sub>2</sub>O) δ: 5.67 (d, *J* = 3.8 Hz, 1H), 5.44 (d, *J* = 2.6 Hz, 1H), 5.30 (d, *J* = 1.9 Hz, 1H), 4.51 (t, *J* = 5.6 Hz, 1H), 4.43 (dd, *J* = 5.1, 2.6 Hz, 1H), 4.35 – 4.30 (m, 2H), 4.24 (t, *J* = 3.1 Hz, 1H), 3.94 – 3.82 (m, 6H), 3.75 – 3.69 (m, 2H), 3.61 – 3.57 (m, 1H), 3.47 – 3.35 (m, 4H), 3.34 – 3.28 (m, 1H), 3.26 – 3.19 (m, 2H), 3.13 – 3.05 (m, 4H), 2.38 (dt, *J* = 12.7, 4.2 Hz, 1H), 2.12 – 2.01 (m, 2H), 1.74 (q, *J* = 12.7 Hz, 1H), 1.69 – 1.63 (m, 1H), 1.57 – 1.44 (m, 2H), 1.41 – 1.25 (m, 2H), 0.90 (t, *J* = 7.2 Hz, 3H) ppm, 26H exchangeable protons merge with H<sub>2</sub>O.

**<sup>13</sup>C{<sup>1</sup>H} NMR** (151 MHz, D<sub>2</sub>O) δ: 108.8, 96.2, 95.3, 83.2, 77.8, 77.4, 77.2, 73.8, 72.9, 72.2, 70.4, 67.7, 67.4, 67.3, 61.2, 55.5, 50.8, 50.4, 50.1, 49.3, 45.2, 42.3, 40.4, 36.8, 29.2, 27.9, 24.5, 18.4, 13.8 ppm.

**HRMS** (ESI/Q-TOF): *m/z* [M+H]<sup>+</sup> Calcd for C<sub>29</sub>H<sub>60</sub>N<sub>7</sub>O<sub>12</sub> 698,4300; Found 698,4333.

**Elemental analysis:** Anal. Calcd for C<sub>29</sub>H<sub>59</sub>N<sub>7</sub>O<sub>12</sub>•7AcOH•2H<sub>2</sub>O: C, 44,75; H, 7,95; N, 8,49; Found C, 44,79; H, 8,07; N, 8,40.

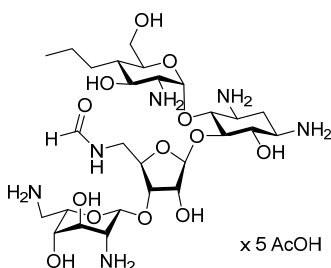

**4',5''-Dideoxy-5''-formamido-4'-propyl paromomycin pentaacetate (11).**

The title compound was obtained from paromomycin derivative **39** (330 mg, 0.19 mmol, 1.0 equiv), Mg(OMe)<sub>2</sub> (7-8 % solution in anhydrous methanol; 6.5 mL, 4.6 mmol, 24.0 equiv) and barium hydroxide (651 mg, 3.8 mmol, 20.0 equiv) by following General Procedure D. Purification by reversed-phase preparative HPLC was followed by treatment with glacial acetic acid to afford the pentaacetate salt of **11** as a white amorphous solid (45 mg, 27 % yield).  $[\alpha]_D^{23} +36.5$  (c 0.33, D<sub>2</sub>O).

**<sup>1</sup>H NMR** (600 MHz, D<sub>2</sub>O)  $\delta$ : 8.19 (1H, s) 5.69 (1H, d, J=3.9 Hz) 5.34 (1H, d, J=3.5 Hz) 5.31-5.29 (1H, m) 4.44 (1H, t, J=5.6 Hz) 4.36-4.31 (2H, m) 4.28-4.24 (2H, m) 3.95-3.84 (6H, m) 3.73-3.67 (3H, m) 3.63-3.60 (1H, m) 3.56 (1H, dd, J=14.6, 6.0 Hz) 3.49-3.39 (4H, m) 3.37-3.31 (1H, m) 2.44 (1H, dt, J=12.3, 3.9 Hz) 1.80 (1H, q, J=12.6 Hz) 1.72-1.66 (1H, m) 1.56-1.48 (2H, m) 1.41-1.29 (2H, m) 0.91 (3H, t, J=7.2 Hz) ppm, 23H exchangeable protons merge with H<sub>2</sub>O.

**<sup>13</sup>C{<sup>1</sup>H} NMR** (151 MHz, D<sub>2</sub>O)  $\delta$ : 164.9 (folded signal), 109.7, 96.2, 95.6, 84.1, 79.9, 79.4, 79.1, 76.8, 74.3, 73.0, 72.2, 70.3, 70.2, 67.6, 67.4, 61.2, 55.4, 50.8, 49.7, 49.1, 42.3, 40.5, 39.4, 28.8, 27.9, 22.6, 18.5, 13.7 ppm.

**HRMS** (ESI/Q-TOF):  $m/z$  [M+H]<sup>+</sup> Calcd for C<sub>27</sub>H<sub>53</sub>N<sub>6</sub>O<sub>13</sub> 669.3671; Found 669.3654.

**Elemental analysis:** Anal. Calcd for C<sub>27</sub>H<sub>52</sub>N<sub>6</sub>O<sub>13</sub>•6AcOH•4H<sub>2</sub>O: C, 42,54; H, 7,69; N, 7,63; Found C, 42,44; H, 7,27; N, 7,56.

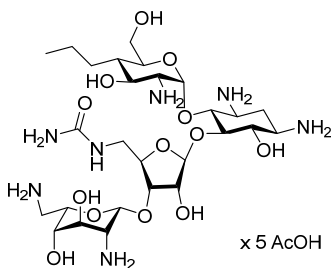

**4',5''-Dideoxy-4'-propyl-5''-ureido-paromomycin pentaacetate (12).**

The title compound was obtained from paromomycin derivative **40** (350 mg, 0.19 mmol, 1.0 equiv), Mg(OMe)<sub>2</sub> (7-8 % solution in anhydrous methanol; 6.3 mL, 4.4 mmol, 24 equiv), barium hydroxide (638 mg, 3.7 mmol, 20.0 equiv) and Pd/C (10 mol% on carbon; 193 mg, 0.18 mmol, 1 equiv) by following General Procedure E. Purification by reversed-phase preparative

HPLC was followed by treatment with glacial acetic acid to afford the pentaacetate salt of **12** as a white amorphous solid (55 mg, 31 % yield).  $[\alpha]_D^{23} +227.8$  (c 0.48, D<sub>2</sub>O).

<sup>1</sup>H NMR (600 MHz, D<sub>2</sub>O) δ: 5.67 (1H, d, J=4.0 Hz) 5.34 (1H, d, J=3.9 Hz) 5.31 (1H, d, J=1.8 Hz) 4.45 (1H, t, J=5.3 Hz) 4.36-4.31 (2H, m) 4.26-4.22 (2H, m) 3.97-3.89 (4H, m) 3.88 (1H, d, J=8.7 Hz) 3.85 (1H, t, J=1.8 Hz) 3.75-3.68 (2H, m) 3.63-3.61 (1H, m) 3.53 (1H, dd, J=14.6, 4.9 Hz) 3.50-3.44 (2H, m) 3.44-3.32 (4H, m) 2.45 (1H, dt, J=12.8, 4.3 Hz) 1.81 (1H, q, J=12.8 Hz) 1.73-1.66 (1H, m) 1.56-1.47 (2H, m) 1.42-1.26 (2H, m) 0.91 (3H, t, J=7.2 Hz) ppm, 24H exchangeable protons merge with H<sub>2</sub>O.

<sup>13</sup>C{<sup>1</sup>H} NMR (151 MHz, D<sub>2</sub>O) δ: 151.4, 109.7, 96.5, 95.7, 84.2, 80.6, 79.7, 77.1, 74.4, 72.8, 72.1, 67.6, 67.4, 67.2, 67.0, 61.2, 55.5, 50.8, 49.6, 49.2, 42.3, 41.5, 40.5, 28.7, 27.9, 27.7, 22.5, 18.5, 13.8 ppm.

HRMS (ESI/Q-TOF): *m/z* [M+H]<sup>+</sup> Calcd for C<sub>27</sub>H<sub>54</sub>N<sub>7</sub>O<sub>13</sub> 684.3780; Found 684.3764.

Elemental analysis: Anal. Calcd for C<sub>27</sub>H<sub>53</sub>N<sub>7</sub>O<sub>13</sub>•6AcOH•5H<sub>2</sub>O: C, 41.04; H, 7.73; N, 8.65; Found C, 41.26; H, 7.07; N, 8.44.

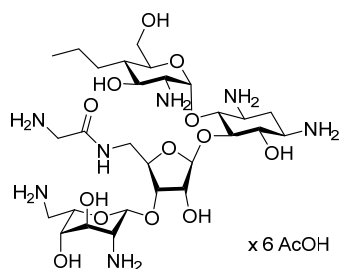

**4',5''-Dideoxy-5''-glycinamido-4'-propyl paromomycin hexacetate (13).**

The title compound was obtained from paromomycin derivative **41** (295 mg, 0.16 mmol, 1.0 equiv), Mg(OMe)<sub>2</sub> (7-8 % solution in anhydrous methanol; 5.2 mL, 3.8 mmol, 24.0 equiv) and barium hydroxide (532 mg, 3.11 mmol, 20.0 equiv) by following General Procedure D. Purification by reversed-phase preparative HPLC was followed by treatment with glacial acetic acid to afford the hexaacetate salt of **13** as a white amorphous solid (75 mg, 43 % yield).  $[\alpha]_D^{23} +42.6$  (c 0.50, D<sub>2</sub>O).

<sup>1</sup>H NMR (600 MHz, D<sub>2</sub>O) δ: 5.77 (0.40H, d, J=3.8 Hz) 5.67 (0.6H, d, J=3.8 Hz) 5.46 (0.40H, d, J=2.0 Hz) 5.36 (0.60H, d, J=3.8 Hz) 5.32 (1H, dd, J=5.8, 2.0 Hz) 4.56 (0.40H, dd, J=6.8, 5.1 Hz) 4.47 (0.40H, dd, J=5.0, 2.0 Hz) 4.39 (0.60H, t, J=5.6 Hz) 4.36-4.33 (1H, m) 4.33-4.27 (1H, m) 4.27-4.22 (1.60H, m) 3.97-3.94 (1H, m) 3.93-3.89 (3H, m) 3.88-3.84 (3H, m) 3.79-3.69 (3H, m) 3.63-3.60 (1H, m) 3.55-3.48 (1H, m) 3.48-3.39 (4H, m) 3.37-3.26 (2H, m) 2.42 (1H, ddt, J=12.4, 8.2, 4.2 Hz) 1.96 (20H, s) 1.77 (1H, q, J=12.4 Hz) 1.73-1.66 (1H, m) 1.57-1.46 (2H, m) 1.41-1.29 (2H, m) 0.91 (3H, t, J=7.1 Hz) ppm, 25H exchangeable protons merge with H<sub>2</sub>O.

$^{13}\text{C}\{^1\text{H}\}$  NMR (151 MHz,  $\text{D}_2\text{O}$ )  $\delta$ : 156.7, 109.4, 108.9, 96.5, 95.8, 95.6, 95.2, 84.1, 83.1, 80.4, 79.1, 77.4, 77.0, 74.1, 73.9, 73.1, 72.3, 70.2, 67.6, 67.5, 67.2, 61.2, 55.4, 55.3, 50.8, 49.9, 49.2, 42.2, 41.7, 41.5, 40.4, 29.0, 27.9, 22.7, 18.5, 13.7 ppm.

HRMS (ESI/Q-TOF):  $m/z$   $[\text{M}+\text{H}]^+$  Calcd for  $\text{C}_{28}\text{H}_{56}\text{N}_7\text{O}_{13}$  698.3936; Found found 698.3942.

Elemental analysis: Anal. Calcd for  $\text{C}_{28}\text{H}_{55}\text{N}_7\text{O}_{13}\cdot 7\text{AcOH}\cdot 3\text{H}_2\text{O}$ : C, 43.04; H, 7.65; N, 8.36; Found C, 43.16; H, 7.37; N, 8.17.

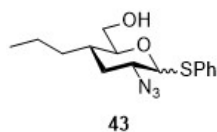

**Phenyl 2-azido-2,3,4-trideoxy-4-C-ethyl-1-thio- $\beta$ -D-glucopyranoside (43).** To a solution of **42** (218 mg, 1.10 mmol) in 1,2-dichloroethane (6.5 ml) were added trimethyl(phenylthio)silane (630  $\mu\text{l}$ , 3.31 mmol) and  $\text{ZnI}_2$  (1.06 g, 3.31 mmol) and the mixture was stirred for 45 h at room temperature. After diluting with 1,2-dichloroethane (11 ml), the mixture was passed through a Celite pad and the cake was washed with 1,2-dichloroethane (6.5 ml). The combined filtrate was washed with saturated  $\text{NaHCO}_3$  solution and saturated  $\text{NaCl}$  solution (1 $\times$ 20 ml, each), dried over  $\text{MgSO}_4$ , filtered, and concentrated under reduced pressure. The residue was taken in a solution of methanol/water (10:1, 6 ml) and added  $\text{K}_2\text{CO}_3$  (305 mg, 2.21 mmol). The mixture was stirred for 1 h at room temperature and then concentrated *in vacuo*. The residue was taken in chloroform (10 ml) and washed with water (1 $\times$ 10 ml). The aqueous phase was extracted with chloroform (2 $\times$ 5 ml). The organic phase was combined, washed with saturated  $\text{NaCl}$  solution (1 $\times$ 20 ml), dried over  $\text{MgSO}_4$ , filtered, and concentrated under reduced pressure. The residue was purified by Flash column chromatography on silica gel (hexane:ethyl acetate = 12:1 to 6:1) to afford **43** (295 mg, 87%) as an anomeric mixture ( $\alpha$ : $\beta$  = 2.8:1); analytical TLC on silica gel, 3:7 EtOAc/hexanes,  $R_f$ =0.60.

Analytical data for **43** ( $\alpha$  anomer):  $^1\text{H}$  NMR (500 MHz,  $\text{CDCl}_3$ )  $\delta$ : 7.58 – 7.48 (m, 2H), 7.37 – 7.24 (m, 3H), 5.55 (dd,  $J$  = 4.9, 1.3 Hz, 1H), 4.04 (ddd,  $J$  = 10.5, 5.8, 2.5 Hz, 1H), 3.84 (dt,  $J$  = 12.5, 4.6 Hz, 1H), 3.81 – 3.73 (m, 1H), 3.67 – 3.61 (m, 1H), 2.07 (dtd,  $J$  = 13.0, 4.3, 1.5 Hz, 1H), 1.82 (t,  $J$  = 6.2 Hz, 1H), 1.78 – 1.68 (m, 1H), 1.54 (q,  $J$  = 12.5 Hz, 1H), 1.50 – 1.15 (m, 4H), 0.94 (t,  $J$  = 7.1 Hz, 3H).

$^{13}\text{C}\{^1\text{H}\}$  NMR (125 MHz,  $\text{CDCl}_3$ )  $\delta$ : 133.6, 132.6, 129.1, 127.7, 88.6, 73.8, 62.8, 59.3, 35.2, 33.1, 29.8, 19.1, 14.2.

Analytical data for **43** ( $\beta$  anomer):  $^1\text{H}$  NMR (500 MHz,  $\text{CDCl}_3$ )  $\delta$ : 7.58 – 7.48 (m, 2H), 7.37 – 7.24 (m, 3H), 4.50 (d,  $J = 9.9$  Hz, 1H), 3.81 – 3.73 (m, 1H), 3.61 – 3.55 (m, 1H), 3.31 (ddd,  $J = 11.5, 9.9, 4.8$  Hz, 1H), 3.24 (ddd,  $J = 9.6, 6.6, 2.6$  Hz, 1H), 2.33 (dt,  $J = 13.0, 4.4$  Hz, 1H), 2.16 (t,  $J = 6.6$  Hz, 1H), 1.68 – 1.58 (m, 1H), 1.50 – 1.15 (m, 5H), 1.12 – 1.00 (m, 1H), 0.90 (t,  $J = 7.1$  Hz, 1H).

$^{13}\text{C}\{^1\text{H}\}$  NMR (125 MHz,  $\text{CDCl}_3$ )  $\delta$ : 132.7, 132.2, 129.0, 128.0, 88.2, 83.3, 63.1, 59.7, 35.6, 35.3, 32.7, 19.2, 14.2.

HRMS (ESI/Q-TOF):  $m/z$   $[\text{M}+\text{Na}]^+$  Calcd for  $\text{C}_{15}\text{H}_{21}\text{N}_3\text{O}_2\text{SNa}$   $[\text{M}+\text{Na}]^+$  330.1252, found 330.1252.

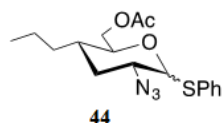

**Phenyl 6-O-acetyl-2-azido-2,3,4-trideoxy-4-C-ethyl-1-thio- $\beta$ -D-glucopyranoside**

**(44)**. To a solution of **43** (203 mg, 660  $\mu\text{mol}$ ) in pyridine (2.1 ml) was added acetic anhydride (187  $\mu\text{l}$ , 1.98 mmol) and the mixture was stirred for 8 h at room temperature. After completion, the reaction mixture was concentration *in vacuo*, co-evaporated with toluene, and purified by Flash column chromatography on silica gel (hexane:ethyl acetate = 7:1 to 4:1) to afford **44** (223 mg, 97%) as an anomeric mixture ( $\alpha:\beta = 2.7:1$ ); analytical TLC on silica gel, 1:4 EtOAc/hexane,  $R_f=0.85$ .

Analytical data for **44** ( $\alpha$  anomer):  $^1\text{H}$  NMR (500 MHz,  $\text{CDCl}_3$ )  $\delta$ : 7.57 – 7.51 (m, 2H), 7.35 – 7.23 (m, 3H), 5.58 (dd,  $J = 4.9, 1.4$  Hz, 1H), 4.31 – 4.17 (m, 3H), 3.90 (dt,  $J = 12.5, 4.6$  Hz, 1H), 2.13 – 2.06 (m, 1H), 2.04 (s, 3H), 1.78 – 1.70 (m, 1H), 1.55 (q,  $J = 12.5$  Hz, 1H), 1.51 – 1.18 (m, 4H), 0.93 (t,  $J = 6.9$  Hz, 3H).

$^{13}\text{C}\{^1\text{H}\}$  NMR (125 MHz,  $\text{CDCl}_3$ )  $\delta$ : 170.8, 133.8, 132.7, 132.1, 129.0, 127.5, 88.4, 71.3, 64.2, 59.0, 35.7, 33.2, 30.0, 20.8, 19.0, 14.1.

Analytical data for **44** ( $\beta$  anomer):  $^1\text{H}$  NMR (500 MHz,  $\text{CDCl}_3$ )  $\delta$ : 7.63 – 7.57 (m, 2H), 7.35 – 7.23 (m, 3H), 4.47 (d,  $J = 9.9$  Hz, 1H), 4.35 (dd,  $J = 11.9, 2.3$  Hz, 1H), 4.13 (dd,  $J = 12.0, 6.6$  Hz, 1H), 3.39 (ddd,  $J = 10.2, 6.6, 2.3$  Hz, 1H), 3.34 (ddd,  $J = 11.6, 9.9, 4.9$  Hz, 1H), 2.34 (dt,  $J = 13.1, 4.4$  Hz, 1H), 2.09 (s, 3H), 1.78 – 1.61 (m, 2H, H4), 1.48 – 1.37 (m, 2H), 1.32 – 1.20 (m, 1H), 1.17 – 1.07 (m, 1H), 0.90 (t,  $J = 7.0$  Hz, 3H).

$^{13}\text{C}\{^1\text{H}\}$  NMR (125 MHz,  $\text{CDCl}_3$ )  $\delta$ : 170.9, 133.8, 132.7, 132.6, 128.8, 127.8, 88.4, 80.5, 64.4, 59.4, 35.7, 35.7, 32.9, 20.9, 19.1, 14.1.

HRMS (ESI/Q-TOF):  $m/z$   $[\text{M}+\text{Na}]^+$  Calcd for  $\text{C}_{17}\text{H}_{23}\text{N}_3\text{O}_3\text{SNa}$  372.1358, found 372.1352.

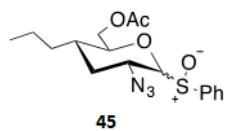

**Phenyl 6-O-acetyl-2-azido-2,3,4-trideoxy-4-C-ethyl-1-thio- $\beta$ -D-glucopyranosyl sulfonate (45).** To a solution of **44** (173 mg, 495  $\mu$ mol) in mixture of

acetonitrile/water (10:1, 4.4 ml) were added,  $\text{NaHCO}_3$  (208 mg, 2.47 mmol) and a solution of Selectfluor (190 mg, 594  $\mu$ mol) in acetonitrile/water (10:1, 4.4 ml). The reaction mixture was stirred at room temperature for 1 h. After completion, solvents were evaporated under reduced pressure, the residue was taken up in dichloromethane (120 ml) and washed with saturated  $\text{NaHCO}_3$  solution:water (1:9), brine solution (1 $\times$ 120 ml, each), dried over  $\text{MgSO}_4$ , filtered, and concentrated under reduced pressure to give **45** (177 mg, 98%) as an anomeric mixtures ( $\alpha$ : $\beta$  = 2.7:1) which are also a mixture of diastereomer on sulfur. The sulfur of  $\alpha$  anomer is most likely with configuration  $S_5$ . These compounds were used to the next reaction without purification; analytical TLC on silica gel, 1:4 EtOAc/hexane,  $R_f$ =0.20.

Analytical data for **45** ( $\alpha$  anomer with  $S_5$  diastereomer):  $^1\text{H NMR}$  (500 MHz,  $\text{CDCl}_3$ )  $\delta$ : 7.77 – 7.46 (m, 5H), 4.76 (ddd,  $J$  = 10.7, 5.3, 2.3 Hz, 1H), 4.30 (d,  $J$  = 5.9 Hz, 1H), 4.15 – 4.08 (m, 1H), 4.06 (dd,  $J$  = 12.3, 2.4 Hz, 1H), 4.02 (dd,  $J$  = 12.3, 5.3 Hz, 1H), 2.34 (q,  $J$  = 12.3 Hz, 1H), 2.22 (dt,  $J$  = 12.6, 4.4 Hz, 1H), 1.99 (s, 3H), 1.79 – 1.60 (m, 1H), 1.51 – 1.43 (m, 1H), 1.43 – 1.33 (m, 3H), 1.33 – 1.26 (m, 2H), 0.91 (t,  $J$  = 6.9 Hz, 3H).

$^{13}\text{C}\{^1\text{H}\}$  NMR (125 MHz,  $\text{CDCl}_3$ )  $\delta$ : 170.7, 141.3 130.9, 129.1, 125.5, 91.6, 77.1, 64.4, 58.8, 35.1, 33.1, 29.5, 20.8, 18.9, 14.1.

**HRMS** (ESI/Q-TOF):  $m/z$  [ $\text{M}+\text{Na}$ ] $^+$  Calcd for  $\text{C}_{17}\text{H}_{23}\text{N}_3\text{O}_4\text{SNa}$  388.1307, found 388.1311.

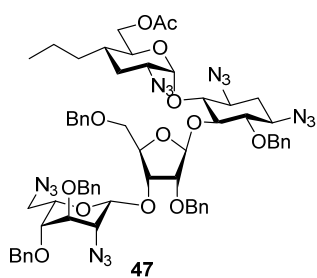

**1,3,2',3',4',2''',6'''-Heptadeoxy-4'-propyl-6'-acetyl-1,3,2',2''',6'''-pentaazido-6,2'',5'',3''',4''''-penta-O-benzyl paromomycin (47).** Donor **45** (100 mg, 0.27

mmol), acceptor **46** (248 mg, 0.25 mmol), and TTBP (203 mg, 0.82 mmol) were charged to a round-bottom flask, co-evaporated with toluene three times, and dried in *vacuo* overnight. The flask was purged with argon, mixed with activated 4 Å MS and the mixture was dissolved in dry dichloromethane (4 mL) and stirred at room temperature for 1 h. The reaction mixture was cooled to  $-70$   $^\circ\text{C}$ , treated with  $\text{Tf}_2\text{O}$  (48  $\mu\text{L}$ , 0.29 mmol) for 30 min, warmed slowly to  $-50$   $^\circ\text{C}$  and continued stirring for 3 h, at  $-50$   $^\circ\text{C}$  before the reaction was quenched with triethylamine (0.2 mL). The reaction mixture was diluted with

EtOAc (15 mL), filtered through Celite<sup>®</sup>, and the filtrate was washed with saturated aqueous solution of NaHCO<sub>3</sub> followed by brine. Solvents were evaporated under reduced pressure and the crude product was purified by column chromatography on silica gel (hexanes: ethyl acetate 20:1 to 4:1) to give **47** (147 mg, α:β, 12:1, 48%) as a white foam; analytical TLC on silica gel, 1:4 EtOAc/hexanes, *R<sub>f</sub>*=0.55;  $[\alpha]_D^{23} +37.5$  (c 1, CHCl<sub>3</sub>).

Analytical data for **47** (α anomer): <sup>1</sup>H NMR (600 MHz, CDCl<sub>3</sub>) δ: 7.64 – 6.91 (m, 25H), 6.09 (d, *J* = 3.5 Hz, 1H), 5.69 (d, *J* = 5.6 Hz, 1H), 5.01 (d, *J* = 10.7 Hz, 1H), 4.90 (d, *J* = 1.9 Hz, 1H), 4.74 (d, *J* = 10.7 Hz, 1H), 4.64 (dd, *J* = 21.6, 11.9 Hz, 2H), 4.56 (d, *J* = 11.8 Hz, 1H), 4.53 – 4.43 (m, 3H), 4.39 – 4.26 (m, 5H), 4.21 – 4.15 (m, 1H), 4.01 (t, *J* = 5.2 Hz, 1H), 3.99 – 3.94 (m, 2H), 3.87 (dd, *J* = 10.3, 2.3 Hz, 1H), 3.80 (dq, *J* = 4.9, 2.9, 2.0 Hz, 2H), 3.75 (dd, *J* = 9.7, 8.8 Hz, 1H), 3.67 (dd, *J* = 13.0, 8.5 Hz, 1H), 3.63 – 3.58 (m, 1H), 3.52 – 3.41 (m, 2H), 3.40 – 3.36 (m, 1H), 3.32 (t, *J* = 9.3 Hz, 1H), 3.18 – 3.14 (m, 1H), 2.94 (dd, *J* = 12.9, 4.0 Hz, 1H), 2.87 (ddd, *J* = 12.6, 4.6, 3.5 Hz, 1H), 2.27 (dt, *J* = 13.2, 4.6 Hz, 1H), 2.11 (s, 3H), 1.92 (dt, *J* = 12.4, 4.3 Hz, 1H), 1.83 (q, *J* = 12.3 Hz, 1H), 1.59 (qd, *J* = 14.7, 14.1, 5.2 Hz, 1H), 1.51 – 1.35 (m, 3H), 1.33 – 1.16 (m, 2H), 0.93 (t, *J* = 7.1 Hz, 3H).

<sup>13</sup>C{<sup>1</sup>H} NMR (151 MHz, CDCl<sub>3</sub>) δ: 171.0, 138.5, 138.0, 137.7, 137.1, 137.0, 128.7, 128.7, 128.5, 128.5, 128.5, 128.4, 128.4, 128.4, 128.4, 128.3, 128.3, 128.2, 128.1, 127.9, 127.9, 127.9, 127.8, 127.7, 127.7, 127.5, 127.5, 127.4, 106.0, 98.6, 95.4, 84.4, 82.4, 82.0, 81.9, 75.6, 75.0, 74.8, 74.3, 73.3, 73.2, 72.9, 72.4, 71.8, 71.6, 70.9, 70.4, 64.7, 60.6, 60.5, 57.3, 57.2, 51.1, 35.4, 33.3, 32.8, 27.4, 21.0, 19.0, 14.2.

HRMS (ESI/Q-TOF): *m/z* [M+Na]<sup>+</sup> Calcd for C<sub>63</sub>H<sub>73</sub>N<sub>15</sub>O<sub>13</sub>Na 1270.5404, found 1270.5409.

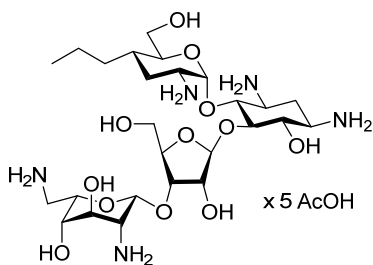

**3',4'-Dideoxy-4'-propyl paromomycin pentaacetate (14).** A solution of

compound **47** (90 mg, 72.1 μmol) in dioxane: 10% aq. acetic acid in deionized water (1:1, 3 mL) was treated with Pd(OH)<sub>2</sub>/C (150 mg) at room temperature under 48 atm of hydrogen for 24 h. After completion as indicated by LRMS, the reaction mixture was filtered through Celite<sup>®</sup>,

filtrate was concentrated to dryness. The crude reaction mixture was taken up in 2.5 mL saturated aqueous barium hydroxide solution and heated to 65 °C for 3 hr. After completion as indicated by LRMS, barium hydroxide was quenched by addition of dry ice (pH = 7), the white precipitate was filtered off and filtrate was concentrated to dryness. The crude product was taken up in 10% aqueous acetic acid and



loaded on a CM Sephadex C-25 column, eluted with water followed by a gradient of 0.1% - 1.0% ammonium hydroxide in deionized water. The fractions containing the product were combined and lyophilized with glacial acetic acid to afford **14** (6.6 mg, 41%) as pentaacetate salt in the form of off white solid.  $[\alpha]_D^{23} +50.8$  (*c* 0.26, H<sub>2</sub>O).

**<sup>1</sup>H NMR** (600 MHz, D<sub>2</sub>O)  $\delta$ : 5.38 (d, *J* = 3.7 Hz, 1H), 5.17 (d, *J* = 3.0 Hz, 1H), 5.12 (d, *J* = 1.8 Hz, 1H), 4.32 (t, *J* = 5.8 Hz, 1H), 4.15 (dd, *J* = 5.1, 3.1 Hz, 1H), 4.13 (t, *J* = 4.7 Hz, 1H), 4.05 (t, *J* = 3.1 Hz, 1H), 4.03 – 3.99 (m, 1H), 3.80 (t, *J* = 9.6 Hz, 1H), 3.75 – 3.65 (m, 3H), 3.64 (dt, *J* = 2.8, 1.3 Hz, 1H), 3.58 (dd, *J* = 12.3, 5.0 Hz, 1H), 3.55 – 3.49 (m, 2H), 3.46 (dd, *J* = 12.1, 6.8 Hz, 1H), 3.42 – 3.40 (m, 1H), 3.39 – 3.32 (m, 1H), 3.25 (dd, *J* = 13.7, 6.6 Hz, 1H), 3.21 – 3.14 (m, 2H), 2.30 (dt, *J* = 12.6, 4.3 Hz, 1H), 1.93 – 1.86 (m, 1H) 1.79 (s, 15H), 1.66 (q, *J* = 12.7 Hz, 1H), 1.54 (q, *J* = 11.2, 10.4 Hz, 1H), 1.42 (q, *J* = 12.3 Hz, 1H), 1.24 – 1.19 (m, 2H), 1.09 – 1.04 (m, 1H), 0.99 (q, *J* = 9.6 Hz, 1H), 0.68 (t, *J* = 6.9 Hz, 3H).

**<sup>13</sup>C{<sup>1</sup>H} NMR** (151 MHz, D<sub>2</sub>O)  $\delta$ : 179.3, 109.9, 95.4, 95.3, 84.0, 81.3, 78.0, 75.2, 73.2, 72.1, 70.1, 67.5, 67.2, 61.1, 60.2, 50.7, 49.6, 49.2, 49.0, 40.3, 33.8, 32.0, 28.1, 26.3, 22.0, 18.3, 13.2.

**HRMS** (ESI/Q-TOF): *m/z* [M+H]<sup>+</sup> Calcd for C<sub>26</sub>H<sub>52</sub>N<sub>5</sub>O<sub>12</sub> 626.3612, found 626.3618.

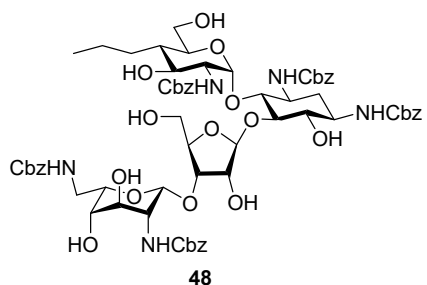

**1,3,2',2''',6'''-Penta-N-benzyloxycarbonyl paromomycin (48).** A

solution of Propylamycin pentaacetate **1** (500 mg, 0.53 mmol) and *N*-(benzyloxycarbonyloxy)succinimide (1.16 g, 4.68 mmol) in DMF (2 mL) was cooled to 0 °C in an ice bath, added DIPEA (1.63 mL, 9.35 mmol) and stirred at 0 °C for 3 h. After completion, the reaction mixture was quenched by addition of 0.5 mL butylamine, diluted

with ethyl acetate (50 mL) and washed sequentially with 0.5 N aq. NaOH solution (10 mL), 1 N HCl solution (10 mL) followed by saturated aqueous NaHCO<sub>3</sub> solution. The aqueous layer was re-extracted in ethyl acetate and the combined organic layer was washed with brine, dried on Na<sub>2</sub>SO<sub>4</sub>, evaporated, and purified by column chromatography on silica gel (1:3 hexane: ethyl acetate to 20:1 ethyl acetate: methanol) to obtain compound **48** as a white foam (596 mg, 86%); analytical TLC on silica gel, 3:17 Methanol/ethyl acetate, *R<sub>f</sub>*=0.70;  $[\alpha]_D^{23} +29.4$  (*c* 1, MeOH).

**HRMS** (ESI/Q-TOF): *m/z* [M+H]<sup>+</sup> Calcd for C<sub>66</sub>H<sub>81</sub>N<sub>5</sub>O<sub>23</sub>Na 1334.5214; Found 1334.5215.

**6',5''-Bis-*O*-(2,4,6-triisopropylbenzenesulfonyl)-1,3,2',2''', 6'''-penta-*N*-benzyloxycarbonyl paromomycin (49).** A solution of compound **48** (530 mg, 0.40 mmol), in pyridine (4 mL) was treated with 2,4,6-triisopropylbenzenesulfonyl chloride (367 mg, 1.21 mmol) at room temperature for 18 h. After complete consumption of starting material, Ac<sub>2</sub>O (315 μL, 3.33 mmol) was added to the reaction mixture and continued stirring at room temperature for another 5 h. The reaction mixture was diluted with ethyl acetate (100 mL), washed with 1 N HCl solution (2x10 mL), saturated aqueous NaHCO<sub>3</sub> and brine solution (1 x15 mL, each), dried over Na<sub>2</sub>SO<sub>4</sub>, filtered, concentrated under reduced pressure and purified by column chromatography on silica gel (hexanes: ethyl acetate 3:2 to 1:3) to obtain acetylated intermediate (525 mg, 63%) as off white foam; analytical TLC on silica gel, 1:1 EtOAc/Hexane, *R<sub>f</sub>*=0.55; [α]<sub>D</sub><sup>23</sup> +19.7 (c 1, CHCl<sub>3</sub>).

**HRMS (ESI/Q-TOF):** *m/z* [M+Na]<sup>+</sup> Calcd for C<sub>106</sub>H<sub>135</sub>N<sub>5</sub>O<sub>32</sub>S<sub>2</sub>Na 2076.8429, found 2076.8469.

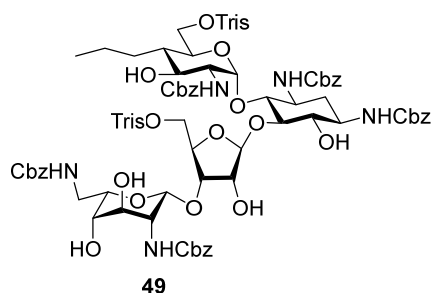

The acetylated ditrisyl intermediate obtained in previous step (190 mg, 92.4 μmol) was treated with 0.2 M solution of NaOMe in methanol (5 mL) at room temperature for 8 h. After complete deacetylation, the reaction mixture was neutralized with amberlyst® 15, filtered and purified by column chromatography on silica gel (methanol: dichloromethane 0:1 to 1:4) to obtain compound **49** in 45% yield (136 mg) over 3 steps; analytical TLC on silica gel, 1:19 Methanol/EtOAc, *R<sub>f</sub>*=0.75; [α]<sub>D</sub><sup>23</sup> = +30.2 (c 1, CHCl<sub>3</sub>).

**HRMS (ESI/Q-TOF):** *m/z* [M+Na]<sup>+</sup> Calcd for C<sub>96</sub>H<sub>125</sub>N<sub>5</sub>O<sub>27</sub>S<sub>2</sub>Na 1866.7896, found 1866.7882.

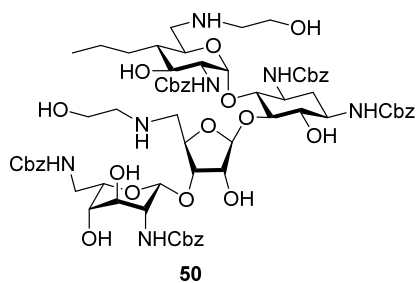

**6',5''-Dideoxy-bis-*N*-(2-hydroxyethyl)-1,3,2',2''', 6'''-penta-*N*-benzyloxycarbonyl paromomycin (50).** A solution of compound **49** (70 mg, 37.9 μmol) in 8 mL of ethanolamine was stirred at room temperature for 12 h. After complete conversion as indicated by LRMS, the reaction mixture was cooled diluted with dichloromethane (25 mL) and washed with brine (2x 4 mL). The aqueous layer was extracted in dichloromethane (4x10 mL), and the combined organic layer was dried over Na<sub>2</sub>SO<sub>4</sub>, concentrated under reduced pressure and purified by column chromatography on silica gel (methanol: dichloromethane 1:25 to 1:5) to afford compound **49** (19 mg, 40%); analytical TLC on silica gel, 3:17 Methanol/CHCl<sub>3</sub>, *R<sub>f</sub>*=0.8; [α]<sub>D</sub><sup>23</sup> +24.1 (c 0.9, MeOH)

**HRMS** (ESI/Q-TOF):  $m/z$   $[M+H]^+$  Calcd for  $C_{70}H_{92}N_7O_{23}$  1398.6245, found 1398.6238.

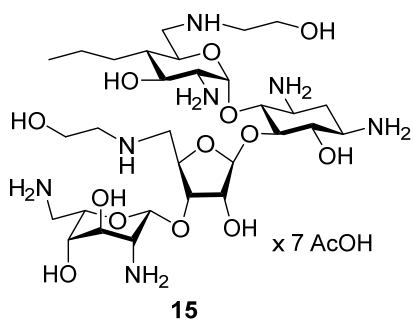

**6',5''-Dideoxy-bis-*N*-(2-hydroxyethyl) paromomycin (15).** A solution of compound **50** (18 mg, 12.9  $\mu$ mol) in dioxane: deionized water (1:1, 1.5 mL) was treated with Pd/C (30 mg) at room temperature under 1 atm of hydrogen (balloon) for 18 h. After completion, as indicated by LRMS, the reaction mixture was filtered through Celite<sup>®</sup>, concentrated to dryness and purified by passing through a CM Sephadex C-25 column, loading in 10% aqueous

acetic acid and eluting with deionized water followed by a gradient of 0.1% - 1.0% ammonium hydroxide in deionized water. The fractions containing the product were combined and lyophilized with glacial acetic acid to afford **15** (6.6 mg, 44%) as heptaacetate salt in the form of a white solid.  $[\alpha]_D^{23} +26.7$  ( $c$  0.44,  $H_2O$ ).

**<sup>1</sup>H NMR** (600 MHz,  $D_2O$ )  $\delta$ : 5.79 (d,  $J$  = 3.8 Hz, 1H), 5.34 (d,  $J$  = 2.2 Hz, 1H), 5.14 (d,  $J$  = 1.8 Hz, 1H), 4.36 (t,  $J$  = 5.8 Hz, 1H), 4.27 (dd,  $J$  = 5.2, 2.3 Hz, 1H), 4.21 (ddd,  $J$  = 9.6, 6.6, 3.1 Hz, 1H), 4.16 (d,  $J$  = 5.4 Hz, 1H), 4.07 (t,  $J$  = 3.1 Hz, 1H), 3.97 (t,  $J$  = 10.5 Hz, 1H), 3.89 (t,  $J$  = 9.4 Hz, 1H), 3.83 (td,  $J$  = 9.8, 9.2, 4.0 Hz, 2H), 3.71 (q,  $J$  = 6.1, 5.3 Hz, 4H), 3.67 (d,  $J$  = 3.2 Hz, 1H), 3.66 – 3.56 (m, 1H), 3.43 (d,  $J$  = 3.0 Hz, 1H), 3.38 (dd,  $J$  = 13.1, 3.0 Hz, 1H), 3.32 (dd,  $J$  = 13.1, 2.6 Hz, 1H), 3.29 – 3.12 (m, 6H), 3.09 (dt,  $J$  = 10.3, 4.6 Hz, 4H), 2.24 – 2.19 (m, 1H), 1.61 (q,  $J$  = 12.5 Hz, 1H), 1.47 (td,  $J$  = 10.4, 5.0 Hz, 1H), 1.34 (td,  $J$  = 11.1, 10.7, 5.5 Hz, 2H), 1.26 – 1.05 (m, 2H), 0.73 (t,  $J$  = 7.2 Hz, 3H).

**<sup>13</sup>C{<sup>1</sup>H} NMR** (151 MHz,  $D_2O$ )  $\delta$ : 106.9, 94.0, 93.2, 82.1, 75.9, 75.6, 71.7, 70.6, 68.8, 67.7, 66.2, 66.0, 64.8, 60.0, 56.1, 55.2, 54.9, 53.5, 49.4, 48.9, 48.3, 48.2, 48.0, 47.5, 42.6, 39.8, 39.0, 26.5, 21.4, 17.2, 12.3.

**HRMS** (ESI/Q-TOF):  $m/z$   $[M+Na]^+$  Calcd for  $C_{30}H_{61}N_7O_{13}Na$  750.4203, found 750.4225.

**Table S1.** Bacterial strains used in this study

| No                                                                                | Bacterial species              | Aminoglycoside Resistance Genes | Source                         | Reference  |
|-----------------------------------------------------------------------------------|--------------------------------|---------------------------------|--------------------------------|------------|
| AG001                                                                             | <i>Escherichia coli</i>        | None                            | Clinical isolate, IMM          | [4]        |
| AG003                                                                             | <i>Escherichia coli</i>        | <i>aac(3)-II</i>                | Clinical isolate, IMM          | [4]        |
| AG038                                                                             | <i>Staphylococcus aureus</i>   | None                            | Clinical isolate, IMM          | [4]        |
| AG163                                                                             | <i>Escherichia coli</i>        | <i>aph(3')-I</i>                | Clinical isolate, IMM          | [5]        |
| AG166                                                                             | <i>Escherichia coli</i>        | <i>aph(3')-IIa</i>              | Clinical isolate, IMM          | [6]        |
| AG173                                                                             | <i>Escherichia coli</i>        | <i>aac(3)-IV</i>                | Clinical isolate, IMM          | [6]        |
| AG175                                                                             | <i>Escherichia coli</i>        | <i>aac(6')-I</i>                | Clinical isolate, IMM          | [7]        |
| AG215                                                                             | <i>Klebsiella pneumoniae</i>   | None                            | Clinical isolate, IMM          | [8]        |
| AG220                                                                             | <i>Pseudomonas aeruginosa</i>  | <i>aph(3')-IIb</i>              | ATCC 27853                     |            |
| AG225                                                                             | <i>Acinetobacter baumannii</i> | None                            | Clinical isolate, IMM          | [4]        |
| AG290                                                                             | <i>Enterobacter cloacae</i>    | None                            | Clinical isolate, IMM          | [4]        |
| EC026                                                                             | <i>Escherichia coli</i>        | None                            | Laboratory strain DH5 $\alpha$ | [5]        |
| EC102                                                                             | <i>Escherichia coli</i>        | <i>armA</i>                     | Engineered strain, IMM         | [5]        |
| EC103                                                                             | <i>Escherichia coli</i>        | <i>rmtB</i>                     | Engineered strain, IMM         | [5]        |
| EC118                                                                             | <i>Escherichia coli</i>        | <i>aac(3)-IV</i>                | Engineered strain, IMM         | [5]        |
| EC125                                                                             | <i>Escherichia coli</i>        | <i>aph(3')-IIb</i>              | Engineered strain, IMM         | [5]        |
| EC141                                                                             | <i>Escherichia coli</i>        | <i>aph(3')-VI</i>               | Engineered strain, IMM         | [5]        |
| EC189                                                                             | <i>Escherichia coli</i>        | <i>aph(3')-Ia</i>               | Engineered strain, IMM         | This study |
| EC191                                                                             | <i>Escherichia coli</i>        | <i>aph(3')-IIa</i>              | Engineered strain, IMM         | This study |
| <b>Strains used as source of hybrid ribosomes for in-vitro translation assays</b> |                                |                                 |                                |            |
| SZ380                                                                             | <i>Mycobacterium smegmatis</i> | None                            | Engineered strain, IMM         | [9]        |
| SZ480                                                                             | <i>M. smegmatis</i> Cyt14      | None                            | Engineered strain, IMM         | [9]        |
| SZ485                                                                             | <i>M. smegmatis</i> Mit13      | None                            | Engineered strain, IMM         | [10]       |
| SZ496                                                                             | <i>M. smegmatis</i> Mit A1555G | None                            | Engineered strain, IMM         | [10]       |

IMM, Institute of Medical Microbiology, University of Zurich

## Cell-free translation inhibition graphs

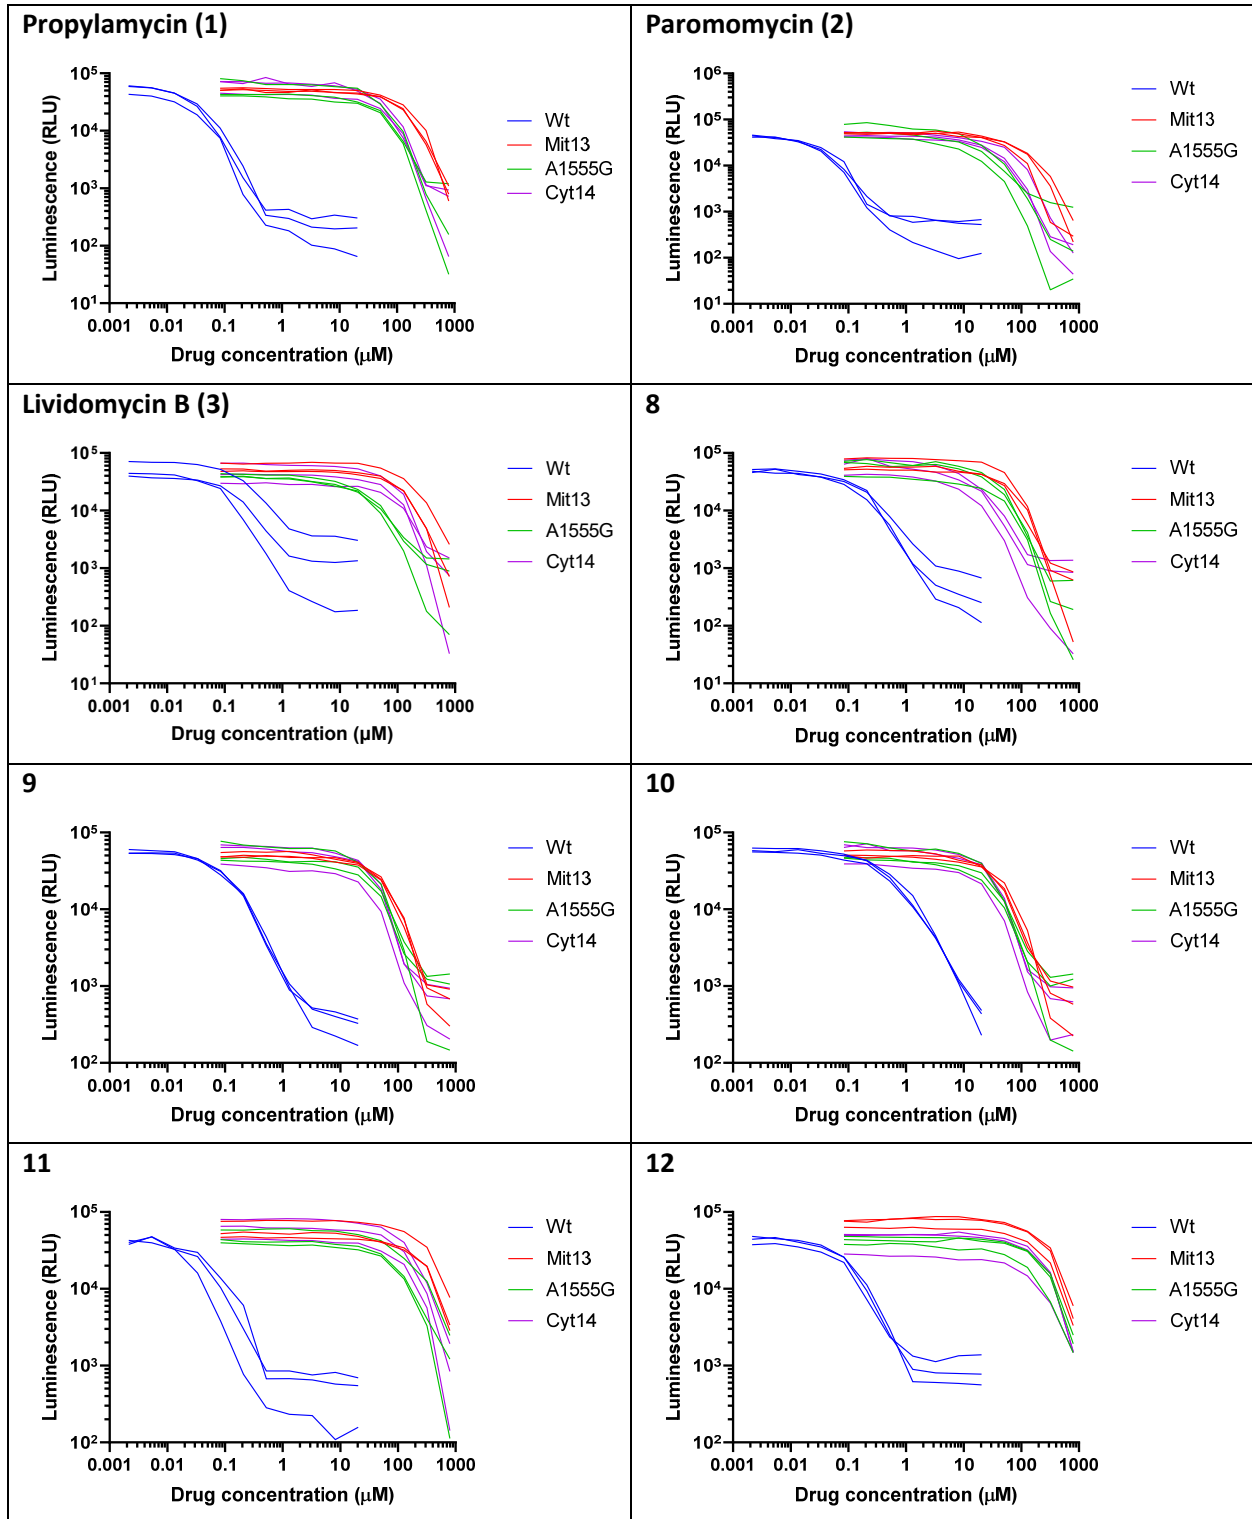

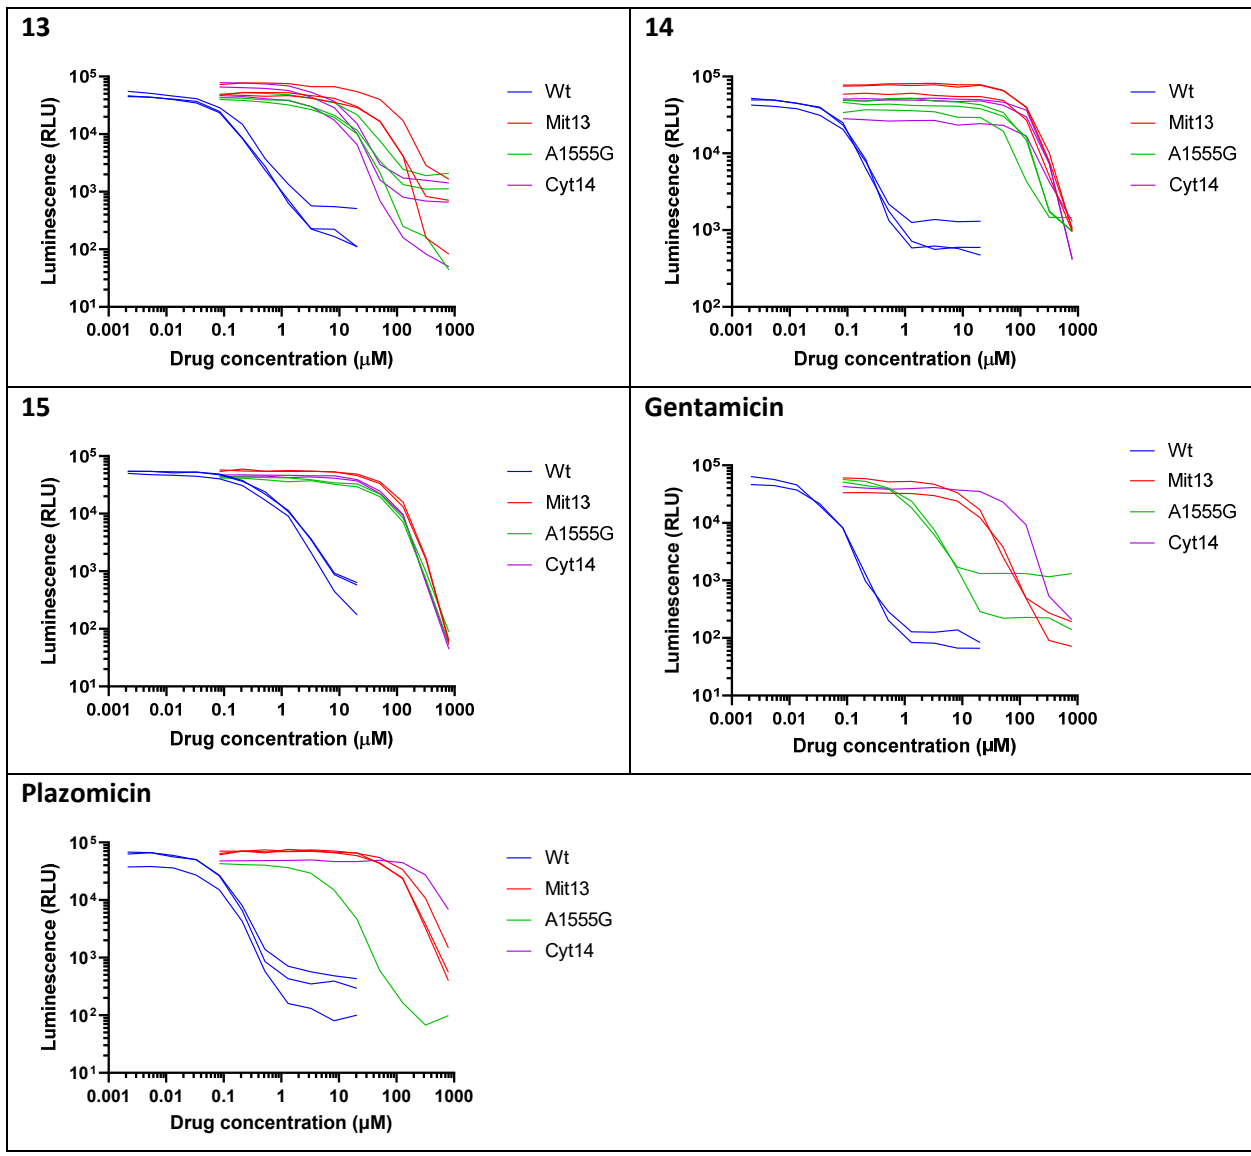

## References

- [1] Bobkov, G. V.; Mikhailov, S. N.; Van Aerschot, A.; Herdewijn, P. Phosphoramidite building blocks for efficient incorporation of 2'-*O*-aminoethoxy(and propoxy)methyl nucleosides into oligonucleotides. *Tetrahedron*. **2008**, *64*, 6238–6251.
- [2] Durrwachter, J. R.; Wong, C. H. Fructose 1,6-diphosphate aldolase-catalyzed stereoselective synthesis of *C*-alkyl and *N*-containing sugars: thermodynamically controlled C-C bond formations. *J. Org. Chem.* **1988**, *53*, 4175–4181.
- [3] Wei, M.; Li, Z.; Li, T.; Wu, B.; Liu, Y.; Qu, J.; Li, X.; Li, L.; Cai, L.; Wang, P. G. Transforming Flask Reaction into Cell-Based Synthesis: Production of Polyhydroxylated Molecules via Engineered *Escherichia coli*. *ACS Catal.* **2015**, *5*, 4060–4065.
- [4] Sati, G. C., Shcherbakov, D., Hobbie, S., Vasella, A., Böttger, E. C., and Crich, D. N6', N6''' and O4'-Modifications to Neomycin Affect Ribosomal Selectivity without Compromising Antibacterial Activity. *ACS Infect. Dis.* **2017**, *3*, 368-377.
- [5] Sonousi, A.; Quirke, J.C.K.; Waduge, P.; Janusic, T.; Gysin, M.; Haldimann, K.; Xu, S.; Hobbie, S.N.; Sha, S.H.; Schacht, J.; Chow, C.S.; Vasella, A.; Böttger, E.C.; Crich, D. An Advanced Apralog with Increased in vitro and in vivo Activity toward Gram-negative Pathogens and Reduced ex vivo Cochleotoxicity. *Chem. Med. Chem.* **2021**, *16*, 335-339
- [6] Quirke, J.C.K.; Rajasekaran, P.; Sarpe, V.A.; Sonousi, A.; Osinnii, I.; Gysin, M.; Haldimann, K.; Fang, Q. J.; Shcherbakov, D.; Hobbie, S.N.; Sha, S.H.; Schacht, J.; Vasella, A.; Böttger, E.C.; Crich, D. Apralogs: Apramycin 5-*O*-Glycosides and Ethers with Improved Antibacterial Activity and Ribosomal Selectivity and Reduced Susceptibility to the Aminoacyltransferase (3)-IV Resistance Determinant. *J. Am. Chem. Soc.* **2020**, *142*, 530-544
- [7] Sonousi, A.; Sarpe, V.A.; Brilkova, M.; Schacht, J.; Vasella, A.; Böttger, E.C.; Crich, D. Effects of the 1-*N*-(4-Amino-2*S*-hydroxybutyryl) and 6'-*N*-(2-Hydroxyethyl) Substituents on Ribosomal Selectivity, Cochleotoxicity and Antibacterial Activity in the Sisomicin Class of Aminoglycoside Antibiotics. *ACS Infect. Dis.* **2018**, *4*, 1114-1120.
- [8] Mandhapaty, A. R.; Yang, G.; Kato, T.; Shcherbakov, D.; Hobbie, S. N.; Vasella, A.; Böttger, E. C.; Crich, D. Structure-Based Design and Synthesis of Apramycin-Paromomycin Analogues. Importance of the Configuration at the 6'-Position and Differences between the 6'-Amino and Hydroxy Series. *J. Am. Chem. Soc.* **2017**, *139*, 14611-14619
- [9] Hobbie, S.N.; Akshay, S.; Kalapala, S.; Bruell, C., Shcherbakov, D.; Böttger, EC. Genetic analysis of interactions with eukaryotic rRNA identify the mitoribosome as target in aminoglycoside ototoxicity. *Proc. Natl. Acad. Sci. USA.* **2008**, *105*, 20888-20893
- [10] Hobbie, S.N.; Kalapala, S.; Akshay, S.; Bruell, C., Schmidt, S.; Dabow, S.; Vasella, A.; Sander, P.; Böttger, E.C. Engineering the rRNA decoding site of eukaryotic cytosolic ribosomes in bacteria. *Nucleic Acids Res.* **2007**, *35*, 6086-6093

5''-O-tert-Butyldimethylsilyl-4',6'-O-benzylidene-1,3,2',6'''-penta-N-trifluoroacetyl paromomycin (17)

[<sup>1</sup>H-NMR, 400 MHz, CD<sub>3</sub>CN]

OSPT2-RZE-5.10.fid

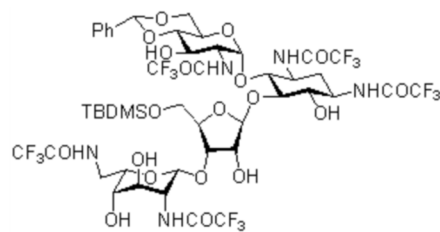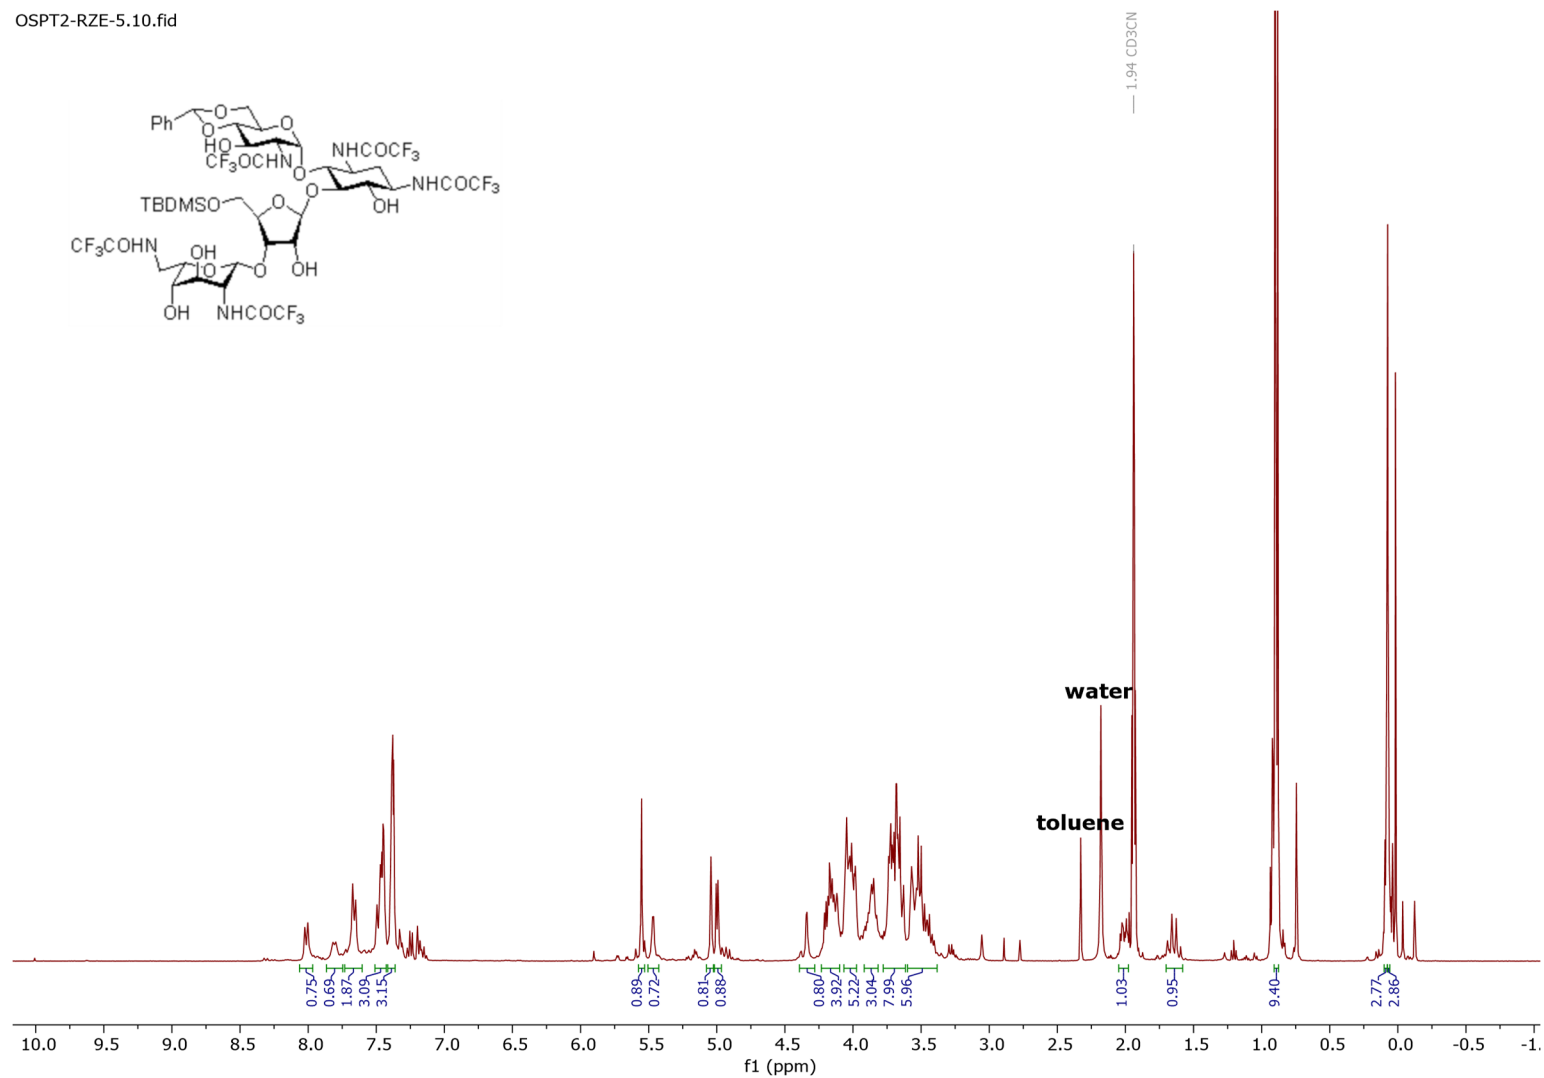



**5''-O-tert-Butyldimethylsilyl-4',6'-O-benzylidene-1,3,2',2''',6'''-penta-N-trifluoroacetyl paromomycin (17)**

[<sup>13</sup>C-NMR, 100.6 MHz, CD<sub>3</sub>CN]

OSPT2-RZE-5.11.fid

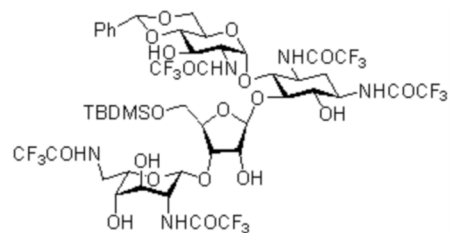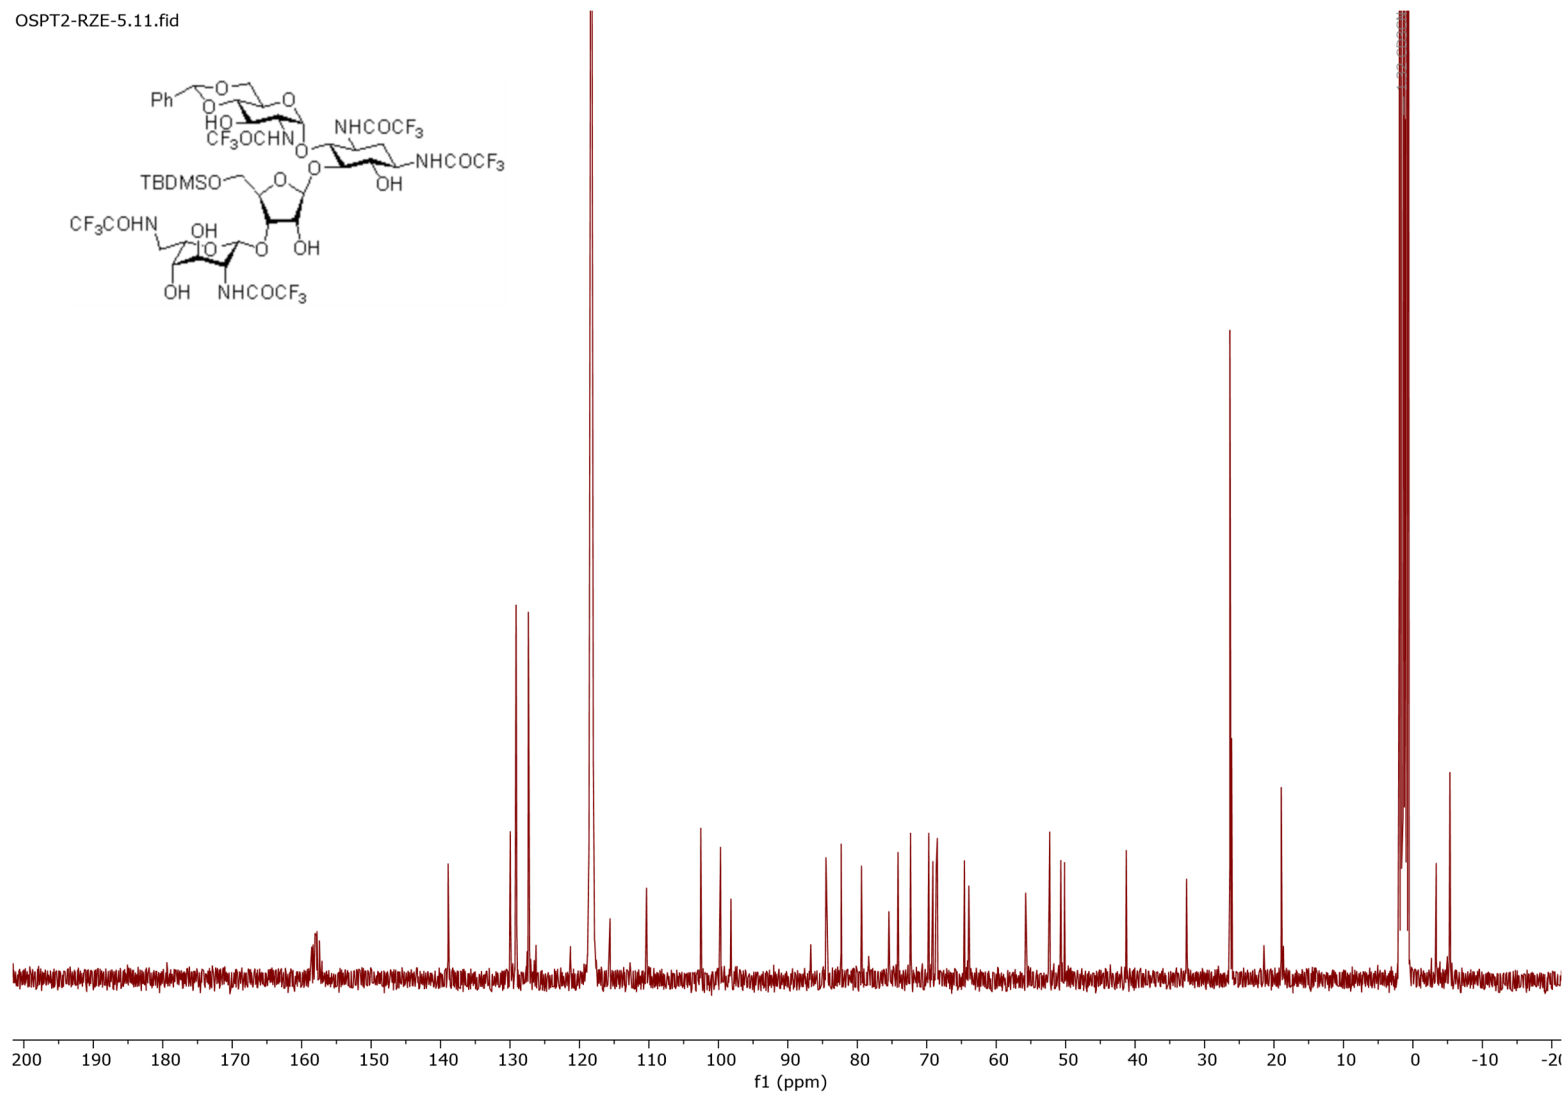

## 5''-O-tert-Butyldimethylsilyl-4',6'-O-benzylidene-1,3,2',2''',6'''-penta-N-trifluoroacetyl paromomycin (17)

Latvijas Organiskās sintēzes institūts  
Fizikāli organiskās ķīmijas laboratorija

MS: Waters Synapt G2-Si Capillary, kV: 0.7 LC: Acquity UPLC H-Class Column: Acquity UPLC BEH C18  
ESI+ Cone, V: 40 2.1x50mm, 1.7µm

### Sample:

HRMS\_2019\_08\_406 1000 Zogota RZE-6

MS\_POS\_2300\_RES\_7min ACN\_Form\_5-98\_040\_4min 1:C,4 1.000000 MS\_Tune Col#43

### Elemental Composition Report:

Tolerance = 3.0 PPM / DBE: min = -1.5, max = 50.0

Element prediction: Off

Number of isotope peaks used for i-FIT = 3

Monoisotopic Mass, Even Electron Ions

526 formula(e) evaluated with 2 results within limits (all results (up to 1000) for each mass)

Elements Used:

C: 0-50 H: 1-110 N: 1-10 O: 0-20 F: 15-15 Na: 1-1 Si: 1-1

| Mass      | RA     | Calc. Mass | mDa  | PPM  | DBE  | i-FIT | Norm  | Conf(%) | Formula                                                                             |
|-----------|--------|------------|------|------|------|-------|-------|---------|-------------------------------------------------------------------------------------|
| 1320.3129 | 100.00 | 1320.3153  | -2.4 | -1.8 | 13.5 | 521.8 | 0.079 | 92.45   | C <sub>46</sub> H <sub>58</sub> N <sub>5</sub> O <sub>19</sub> F <sub>15</sub> NaSi |
|           |        | 1320.3167  | -3.8 | -2.9 | 18.5 | 524.3 | 2.583 | 7.55    | C <sub>47</sub> H <sub>54</sub> N <sub>9</sub> O <sub>15</sub> F <sub>15</sub> NaSi |

### 1000 Zogota RZE-6

HRMS\_2019\_08\_406 821 (2.304) Cm (819:829-(790:798+851:858))

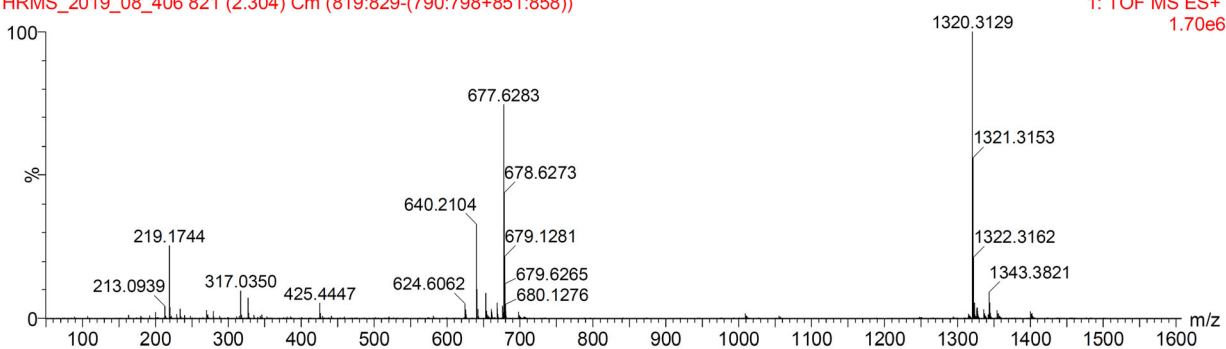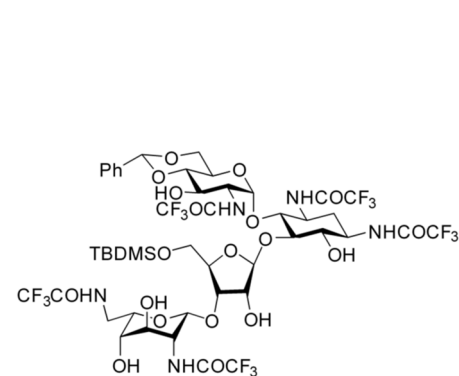

**6,3',2'',3''',4''''-Penta-O-benzoyl-5''-O-tert-butylidimethylsilyl-4',6'-O-benzylidene-1,3,2',2''',6''''-penta-N-trifluoroacetyl paromomycin (18)**

[<sup>1</sup>H-NMR, 600 MHz, CD<sub>3</sub>OD]

OSPT2-RZE-7.1.fid

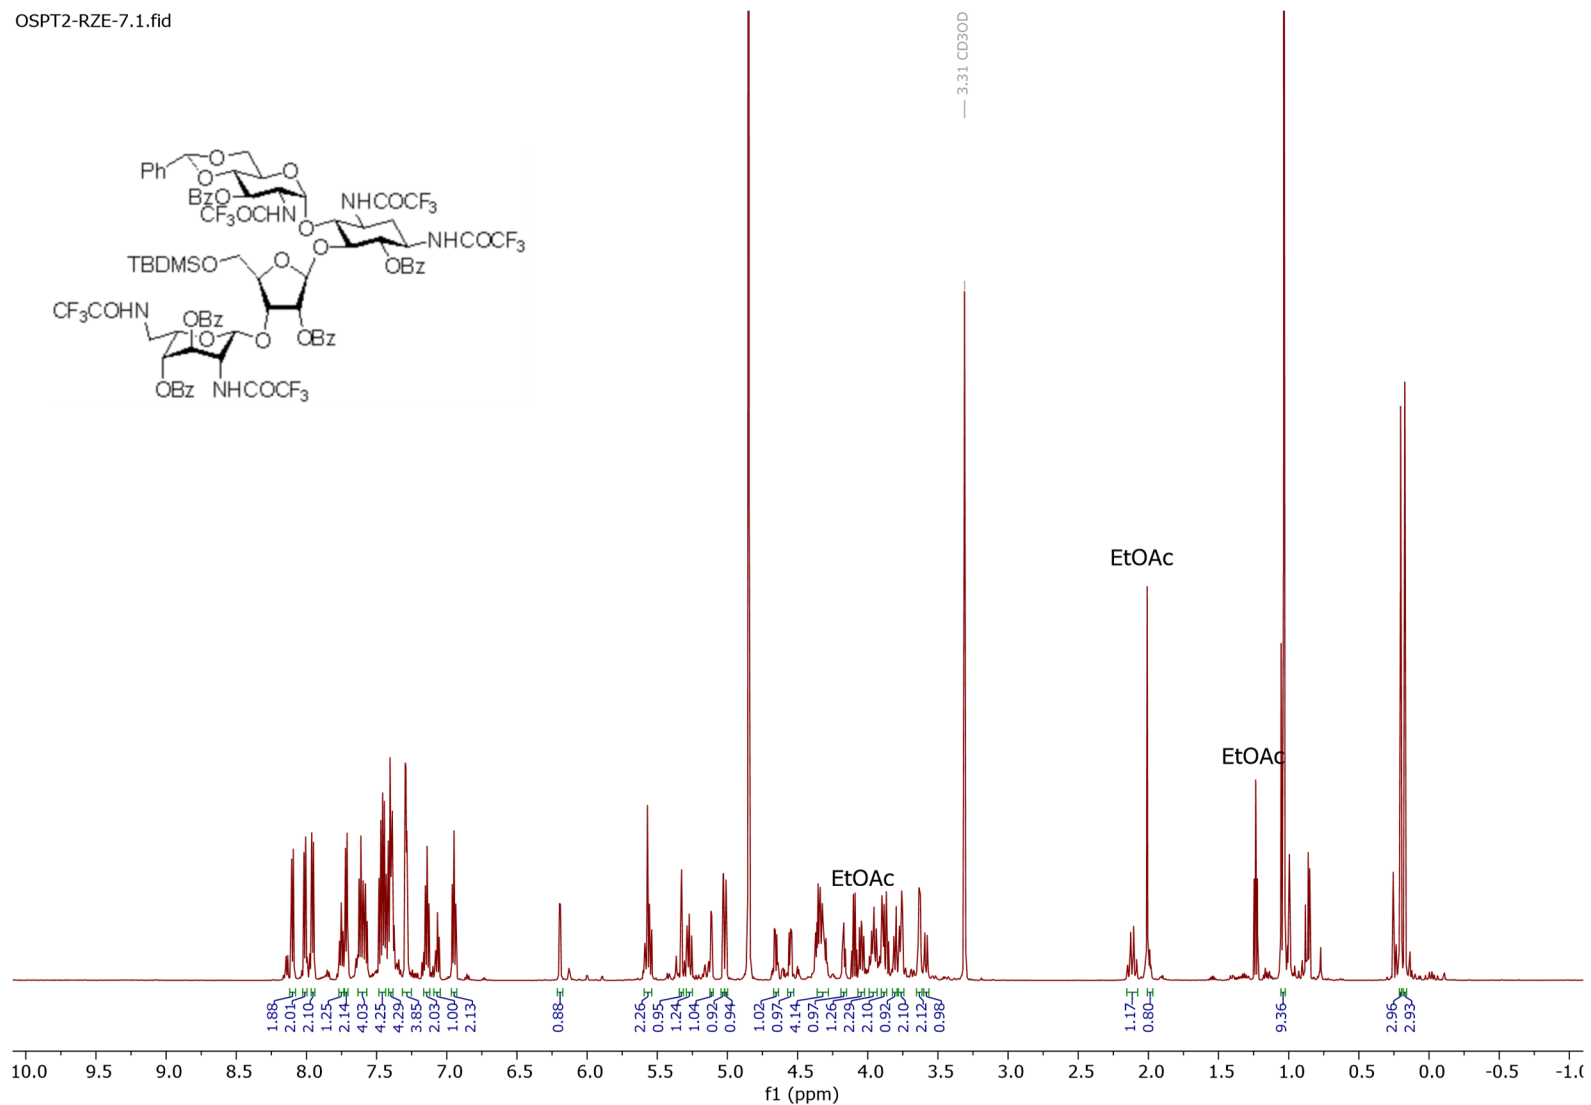

**6,3',2'',3''',4''''-Penta-O-benzoyl-5''-O-tert-butylidimethylsilyl-4',6'-O-benzylidene-1,3,2',2''',6''''-penta-N-trifluoroacetyl paromomycin (18)**

[<sup>13</sup>C-NMR, 150.9 MHz, CD<sub>3</sub>OD]

OSPT2-RZE-7.3.fid  
Fdec

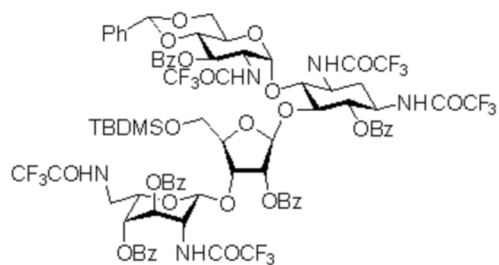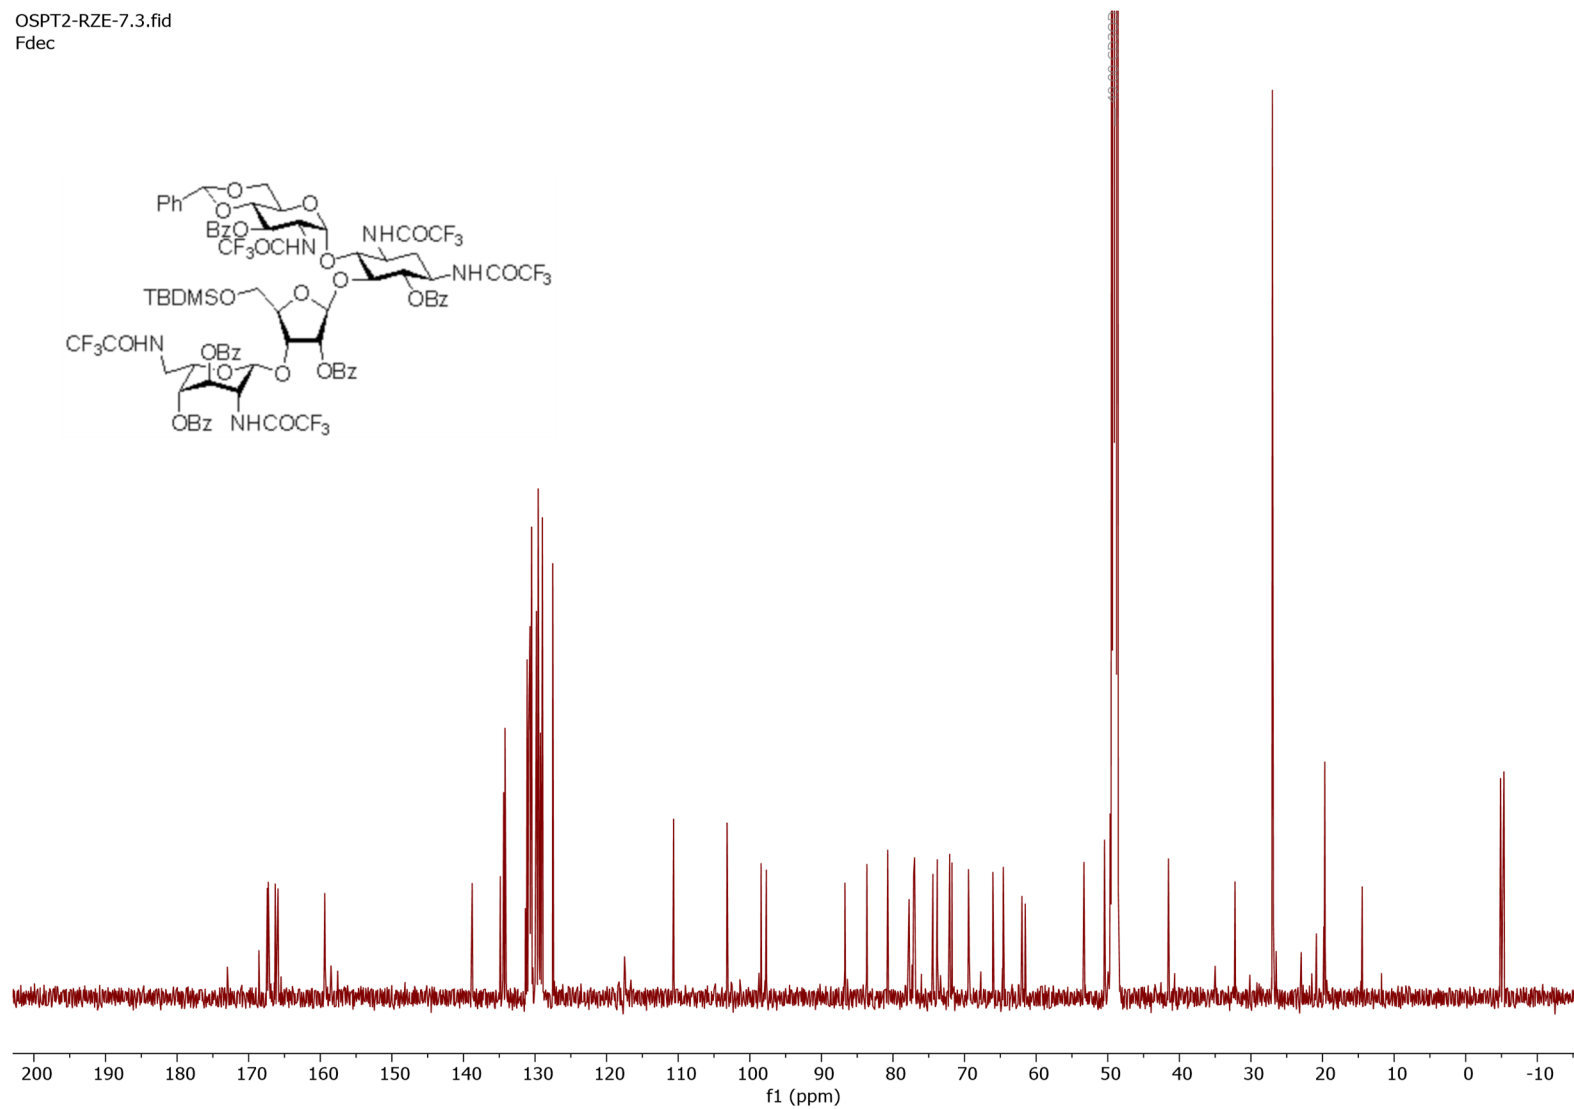

**6,3',2'',3''',4''-Penta-O-benzoyl-5''-O-tert-butyldimethylsilyl-4',6'-O-benzylidene-1,3,2',2''',6''-penta-N-trifluoroacetyl paromomycin (18)**

Latvijas Organiskās sintēzes institūts  
Fizikāli organiskās ķīmijas laboratorija

**MS: Waters Synapt G2-Si** Capillary, kV: 0.7      **LC: Acquity UPLC H-Class** Column: Acquity UPLC BEH C18  
**ESI+** Cone, V: 40      2.1x50mm, 1.7µm

**Sample:**

HRMS\_2019\_08\_431 1001 Zogota RZE-7

MS\_POS\_500-2000\_RES\_7min ACN\_Form\_5-98\_040\_7min 1:C,5 10.000000 MS\_Tune Col#43

**Elemental Composition Report:**

Tolerance = 5.0 PPM / DBE: min = -1.5, max = 50.0

Element prediction: Off

Number of isotope peaks used for i-FIT = 3

Monoisotopic Mass, Even Electron Ions

349 formula(e) evaluated with 1 results within limits (all results (up to 1000) for each mass)

Elements Used:

C: 0-81 H: 1-110 N: 1-10 O: 0-25 F: 15-15 Na: 1-1 Si: 1-1

| Mass      | RA     | Calc. Mass | mDa  | PPM  | DBE  | i-FIT | Norm | Conf(%) | Formula                  |
|-----------|--------|------------|------|------|------|-------|------|---------|--------------------------|
| 1840.4443 | 100.00 | 1840.4464  | -2.1 | -1.1 | 38.5 | 439.4 | n/a  | n/a     | C81 H78 N5 O24 F15 Na Si |

**1001 Zogota RZE-7**

HRMS\_2019\_08\_431 1659 (4.638) Cm (1658:1667-(1622:1630+1707:1716))

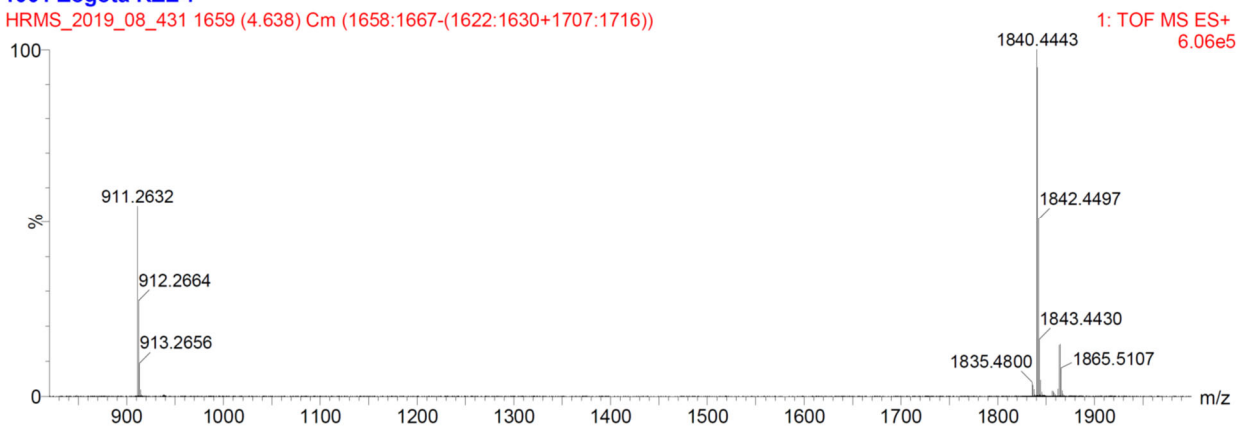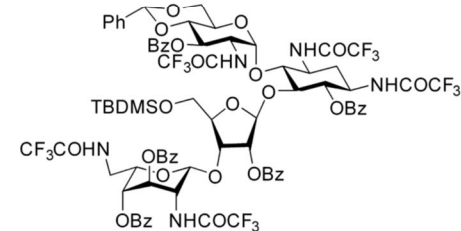

**6,3',2'',3''',4'''-Penta-O-benzoyl-4',6'-O-benzylidene-1,3,2',2'',6'''-penta-N-trifluoroacetyl paromomycin (19)**

[<sup>1</sup>H-NMR, 600 MHz, CD<sub>3</sub>OD]

OSPT2-RZE-37-prep.1.fid

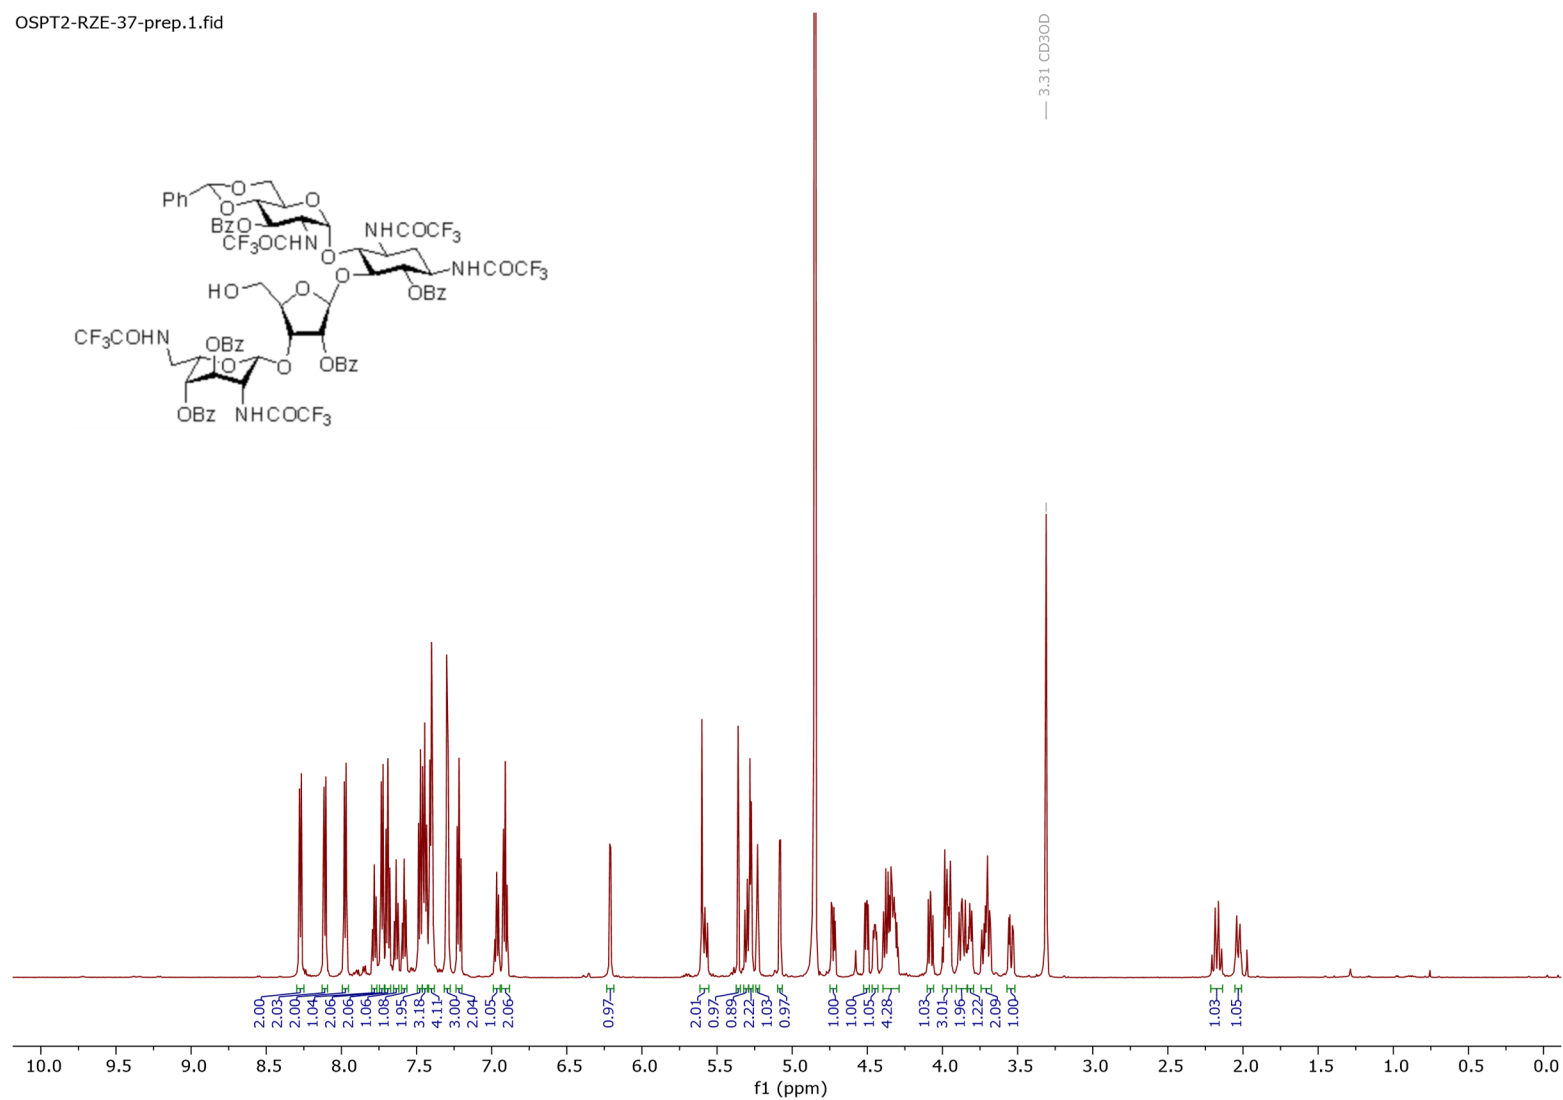

**6,3',2'',3''',4''''-Penta-O-benzoyl-4',6'-O-benzylidene-1,3,2',2'',6'''-penta-N-trifluoroacetyl paromomycin (19)**

[<sup>13</sup>C-NMR, 150.9 MHz, CD<sub>3</sub>OD]

OSPT2-RZE-37-prep.4.fid

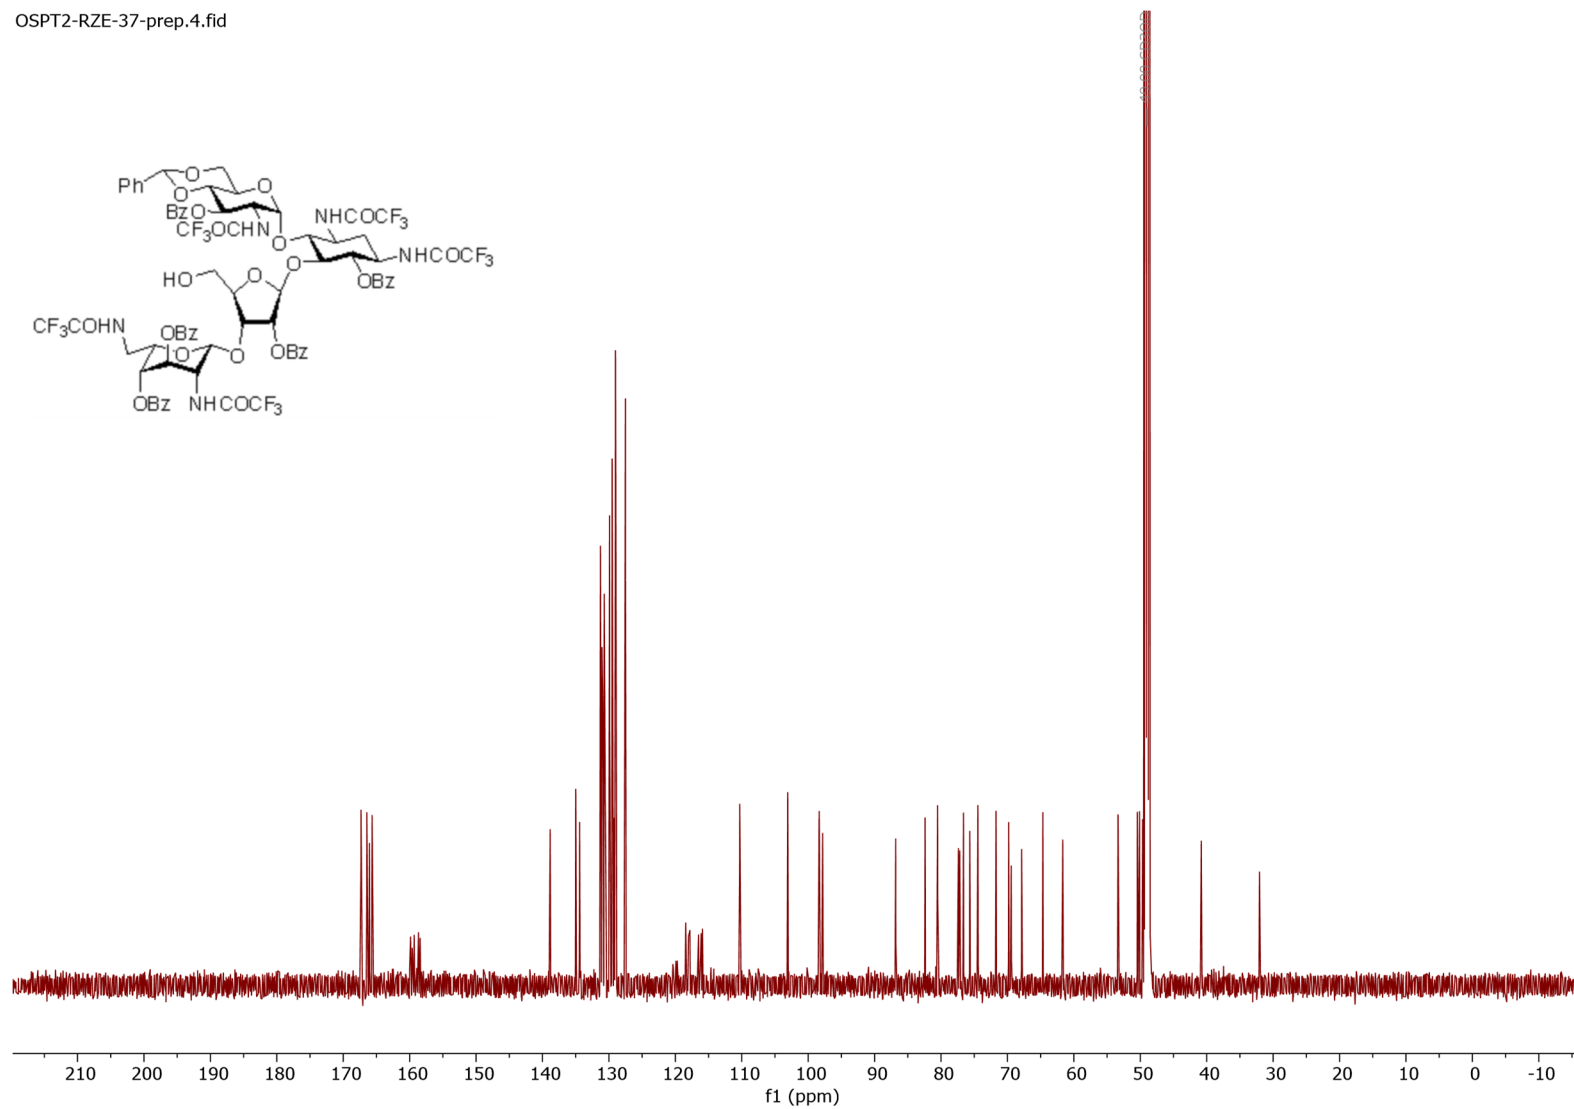

**6,3',2'',3''',4''''-Penta-O-benzoyl-4',6'-O-benzylidene-1,3,2',2''',6''''-penta-N-trifluoroacetyl paromomycin (19)**

Latvijas Organiskās sintēzes institūts  
Fizikāli organiskās ķīmijas laboratorija

**MS: Waters Synapt G2-Si** Capillary, kV: 0.7      **LC: Acquity UPLC H-Class** Column: Acquity UPLC BEH C18  
**ESI+** Cone, V: 40      2.1x50mm, 1.7µm

**Sample:**

HRMS\_2019\_08\_433 1002 Zogota RZE-9

MS\_POS\_500-2000\_RES\_7min ACN\_Form\_5-98\_040\_7min 1:C,6 10.000000 MS\_Tune Col#43

**Elemental Composition Report:**

Tolerance = 5.0 PPM / DBE: min = -1.5, max = 50.0

Element prediction: Off

Number of isotope peaks used for i-FIT = 3

Monoisotopic Mass, Even Electron Ions

402 formula(e) evaluated with 1 results within limits (all results (up to 1000) for each mass)

Elements Used:

C: 0-75 H: 1-110 N: 1-10 O: 0-25 F: 15-15 Na: 1-1

| Mass      | RA     | Calc. Mass | mDa  | PPM  | DBE  | i-FIT | Norm | Conf(%) | Formula               |
|-----------|--------|------------|------|------|------|-------|------|---------|-----------------------|
| 1726.3567 | 100.00 | 1726.3599  | -3.2 | -1.9 | 38.5 | 420.6 | n/a  | n/a     | C75 H64 N5 O24 F15 Na |

**1002 Zogota RZE-9**

HRMS\_2019\_08\_433 1510 (4.224) Cm (1509:1517-(1480:1489+1550:1556))

1: TOF MS ES+  
3.33e6

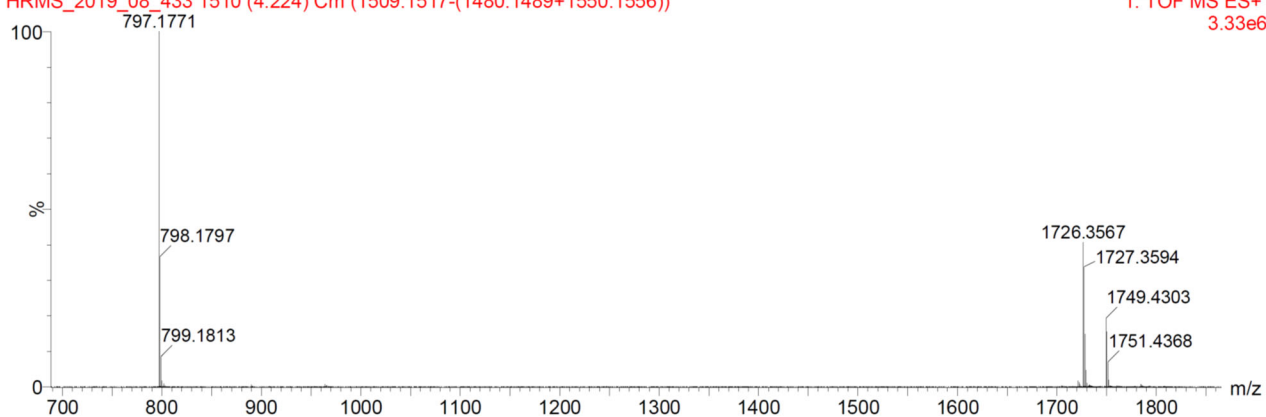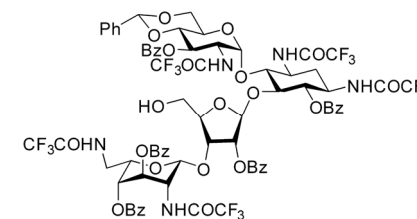



5''-Deoxy-5''-azido-6,3',2'',3''',4'''-penta-O-benzoyl-4',6'-O-benzylidene-1,3,2',2''',6'''-penta-N-trifluoroacetyl paromomycin (20)

[<sup>1</sup>H-NMR, 600 MHz, CD<sub>3</sub>OD]

OSPT2-RZE-38-prep.1.fid

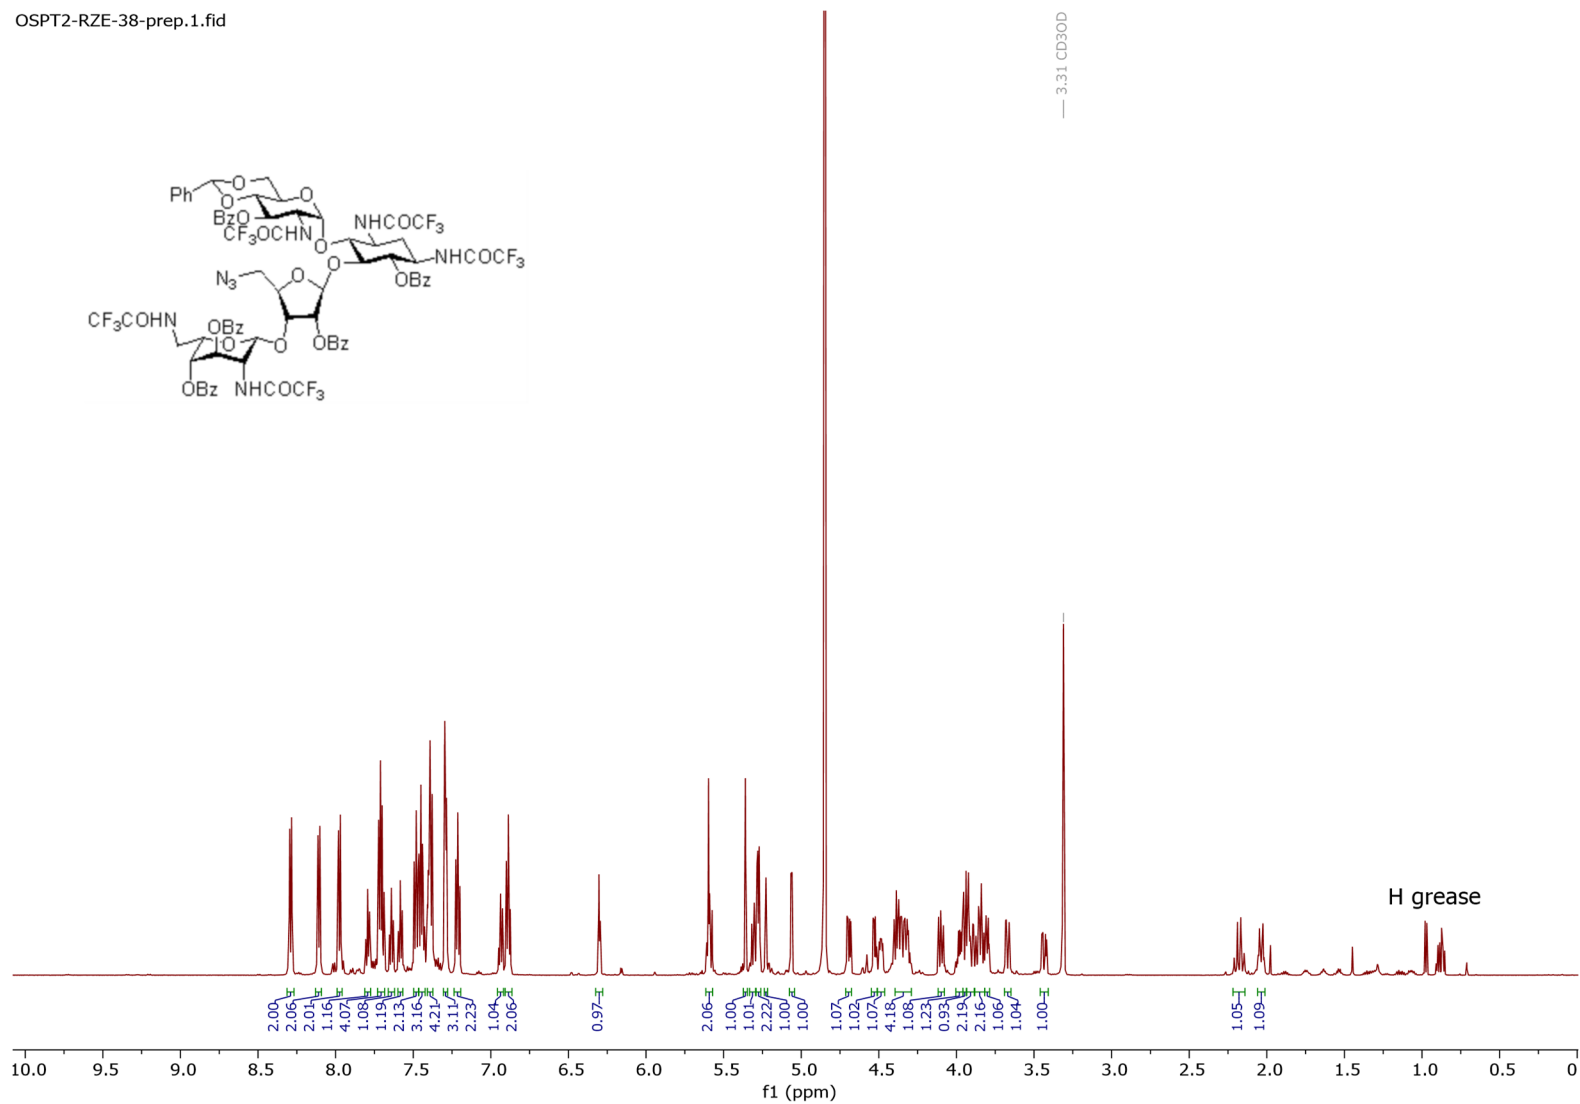

**5''-Deoxy-5''-azido-6,3',2'',3''',4'''-penta-O-benzoyl-4',6'-O-benzylidene-1,3,2',2''',6'''-penta-N-trifluoroacetyl paromomycin (20)**

[<sup>13</sup>C-NMR, 150.9 MHz, CD<sub>3</sub>OD]

OSPT2-RZE-38-prep.4.fid

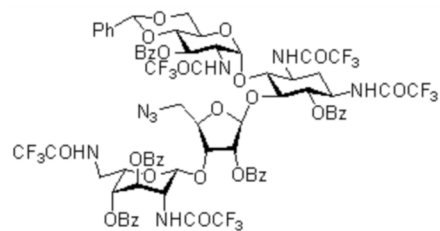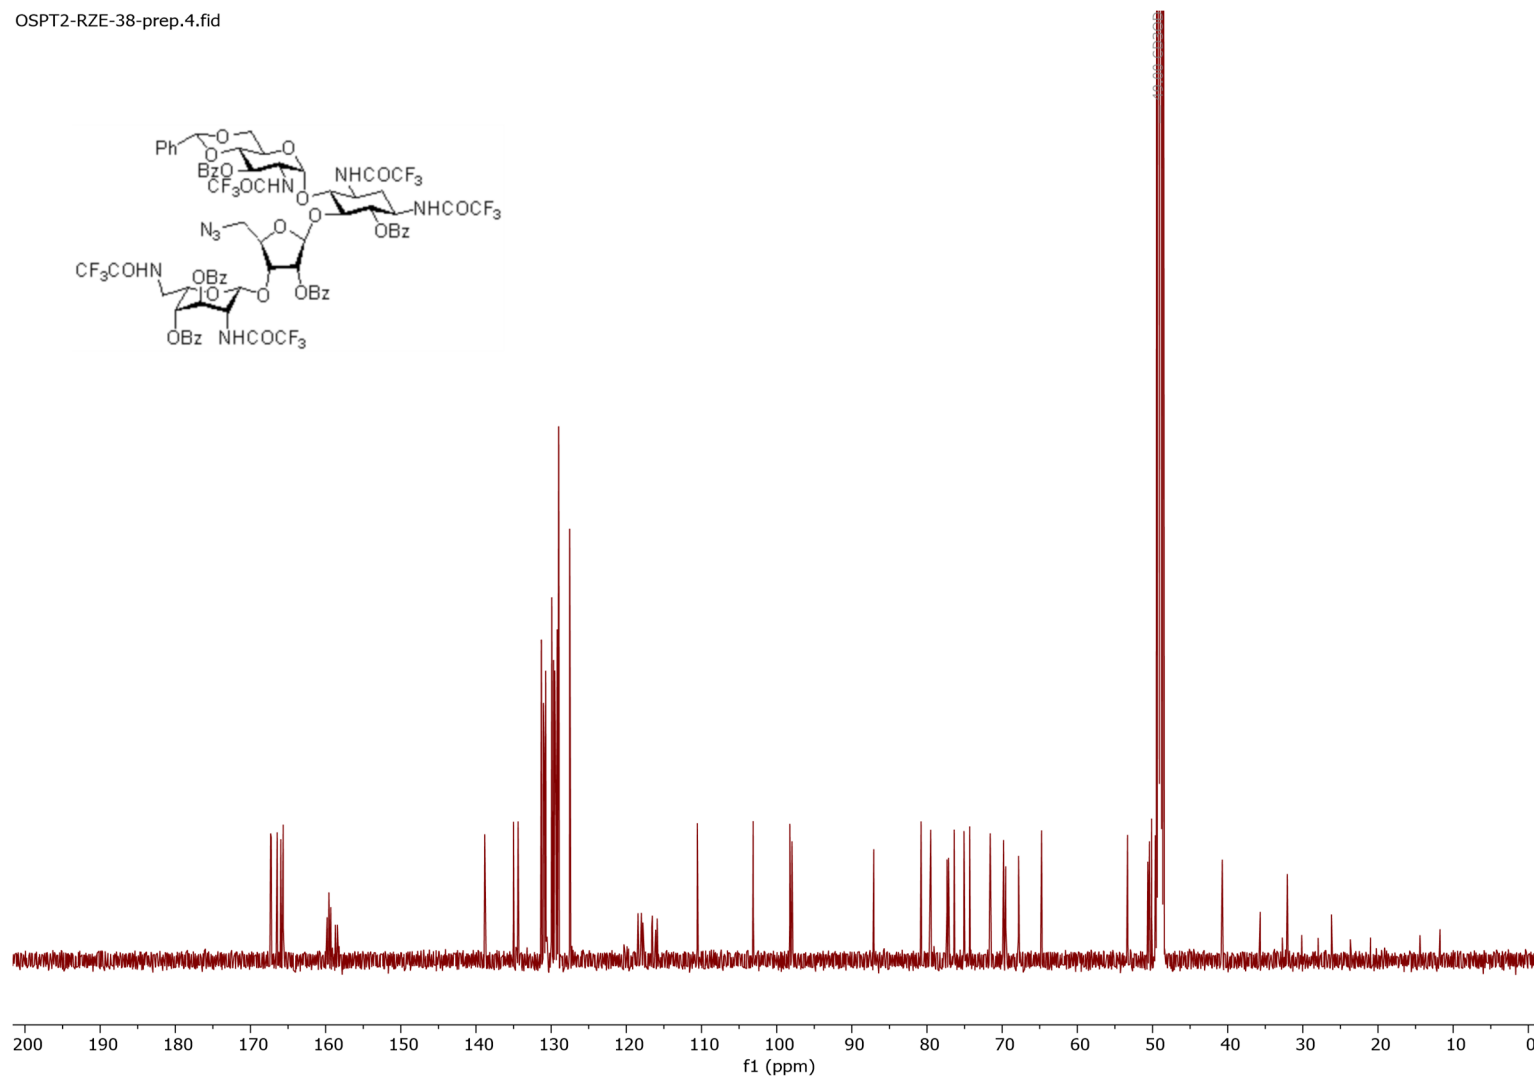

**5''-Deoxy-5''-azido-6,3',2'',3''',4''''-penta-O-benzoyl-4',6'-O-benzylidene-1,3,2',2''',6''''-penta-N-trifluoroacetyl paromomycin (20)**

Latvijas Organiskās sintēzes institūts  
Fizikāli organiskās ķīmijas laboratorija

**MS: Waters Synapt G2-Si** Capillary, kV: 0.7      **LC: Acquity UPLC H-Class** Column: Acquity UPLC BEH C18  
**ESI+** Cone, V: 40      2.1x50mm, 1.7µm

**Sample:**

HRMS\_2019\_08\_435 1003 Zogota RZE-38

MS\_POS\_500-2000\_RES\_7min ACN\_Form\_5-98\_040\_7min 1:C,7 10.000000 MS\_Tune Col#43

**Elemental Composition Report:**

Tolerance = 5.0 PPM / DBE: min = -1.5, max = 50.0

Element prediction: Off

Number of isotope peaks used for i-FIT = 3

Monoisotopic Mass, Even Electron Ions

252 formula(e) evaluated with 1 results within limits (all results (up to 1000) for each mass)

Elements Used:

C: 0-75 H: 1-110 N: 1-10 O: 0-23 F: 15-15 Na: 1-1

| Mass      | RA     | Calc. Mass | mDa  | PPM  | DBE  | i-FIT | Norm | Conf(%) | Formula               |
|-----------|--------|------------|------|------|------|-------|------|---------|-----------------------|
| 1751.3624 | 100.00 | 1751.3664  | -4.0 | -2.3 | 40.5 | 463.4 | n/a  | n/a     | C75 H63 N8 O23 F15 Na |

**1003 Zogota RZE-38**

HRMS\_2019\_08\_435 1549 (4.330) Cm (1545:1552-(1517:1521+1583:1588))

1: TOF MS ES+  
1.20e6

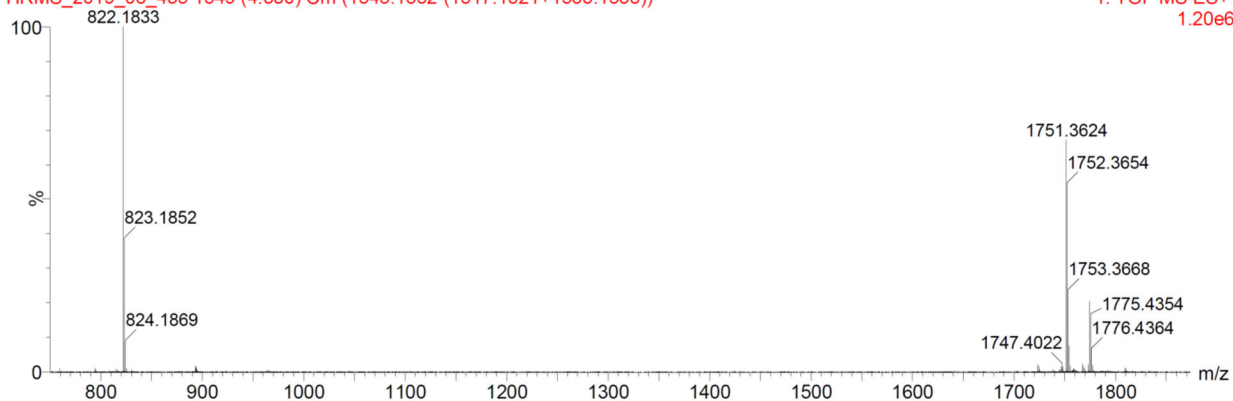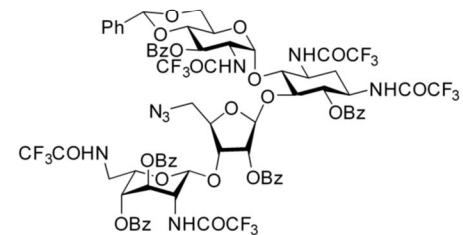

5''-Deoxy-5''-amino-6,3',2'',3''',4'''-penta-O-benzoyl-4',6'-O-benzylidene-1,3,2',2''',6'''-penta-N-trifluoroacetyl paromomycin (21)

[<sup>1</sup>H-NMR, 600 MHz, CD<sub>3</sub>OD]

OSPT2-RZE-21.1.fid

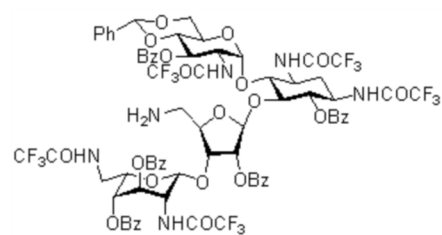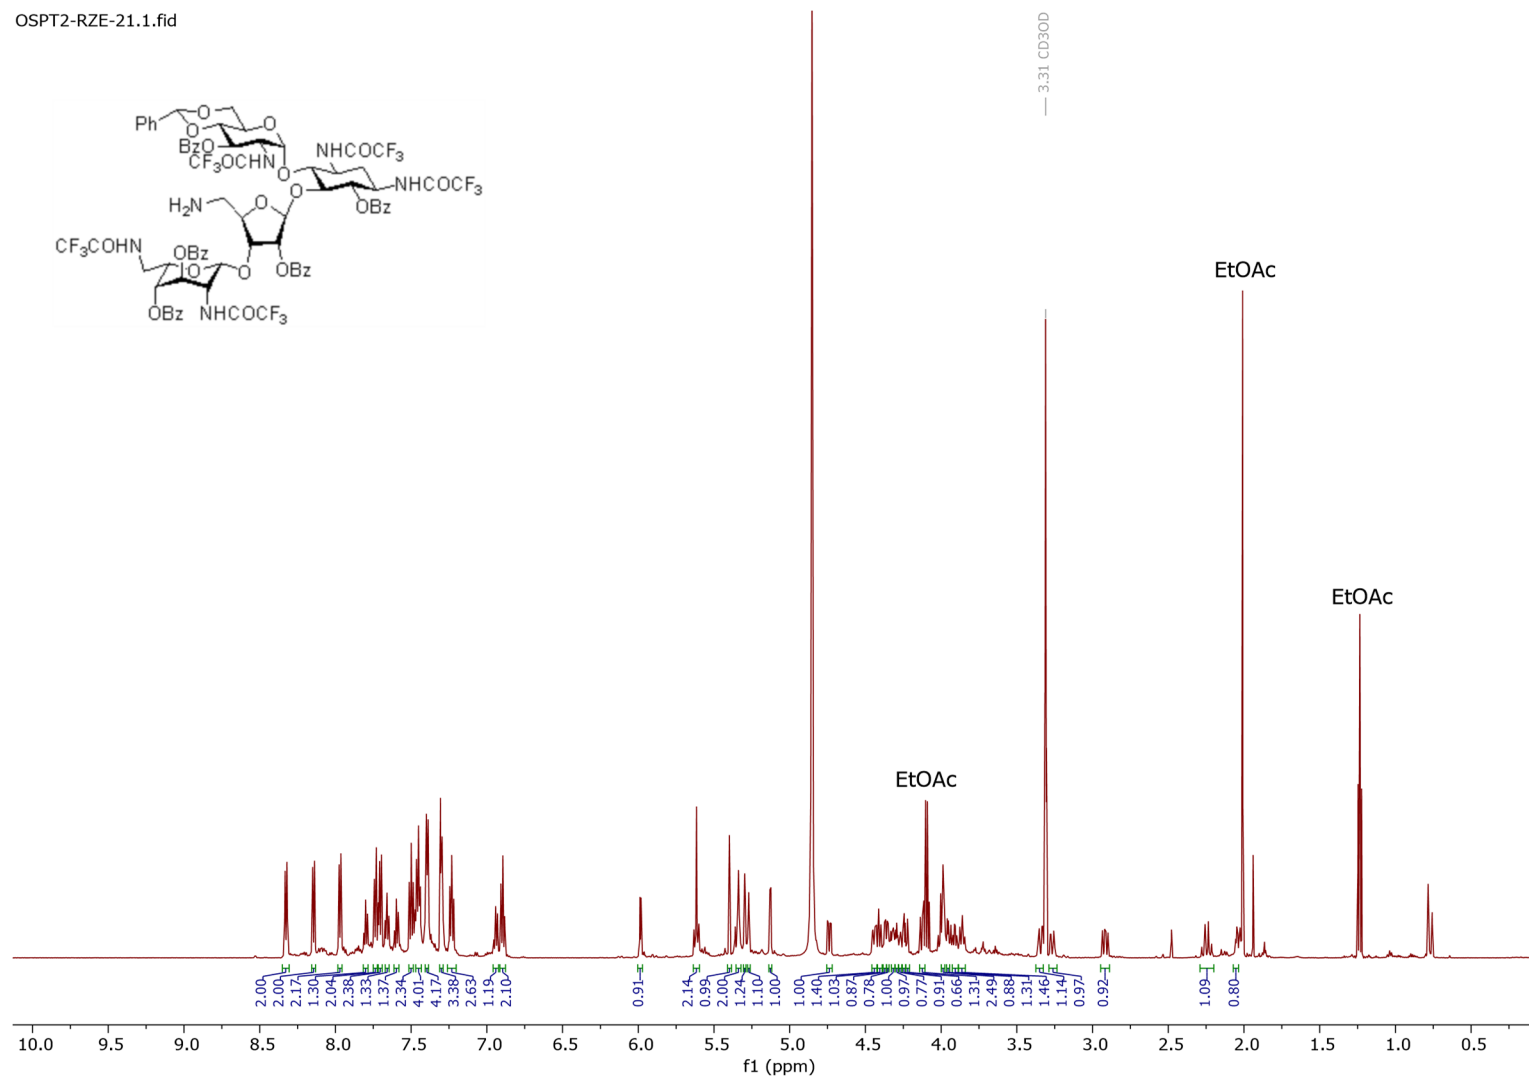

**5''-Deoxy-5''-amino-6,3',2'',3''',4'''-penta-O-benzoyl-4',6'-O-benzylidene-1,3,2',2''',6'''-penta-N-trifluoroacetyl paromomycin (21)**

[<sup>13</sup>C-NMR, 150.9 MHz, CD<sub>3</sub>OD]

OSPT2-RZE-21.10.fid  
summa 5+6

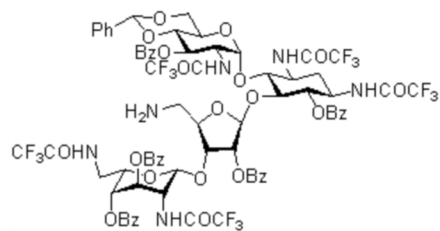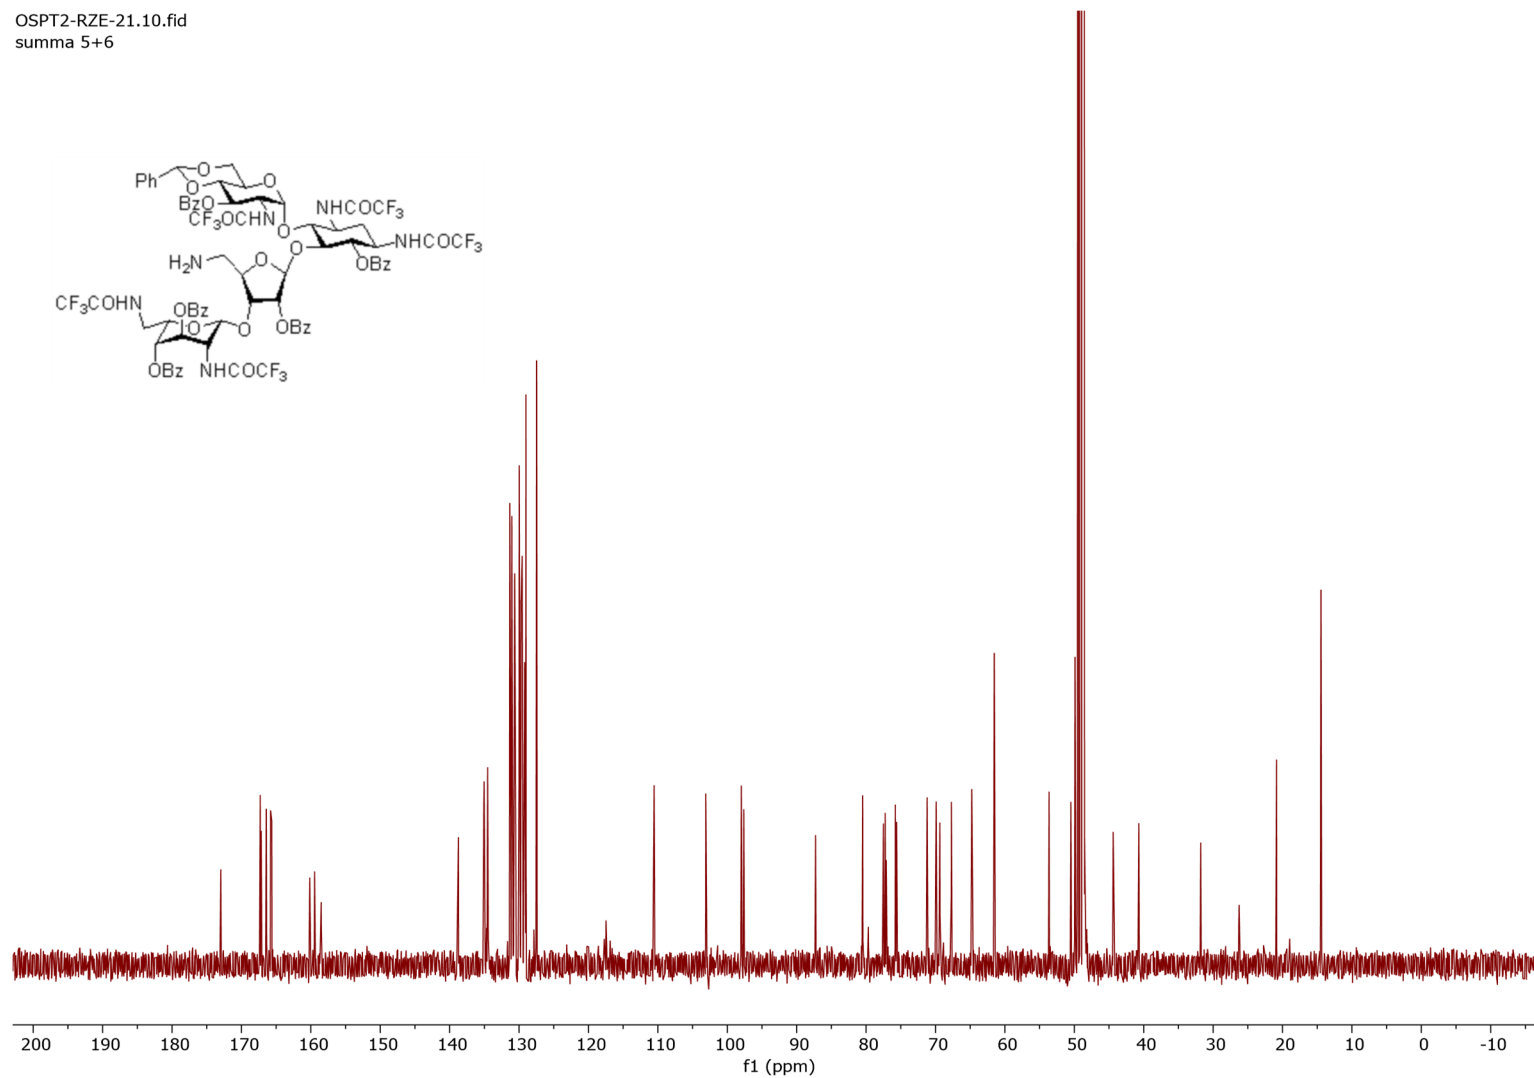

**5''-Deoxy-5''-amino-6,3',2'',3''',4''''-penta-O-benzoyl-4',6'-O-benzylidene-1,3,2',2''',6''''-penta-N-trifluoroacetyl paromomycin (21)**

Latvijas Organiskās sintēzes institūts  
Fizikāli organiskās ķīmijas laboratorija

**MS: Waters Synapt G2-Si** Capillary, kV: 0.7      **LC: Acquity UPLC H-Class** Column: Acquity UPLC BEH C18  
**ESI+** Cone, V: 40      2.1x50mm, 1.7µm

**Sample:**

HRMS\_2019\_08\_437 1004 Zogota RZE-16  
MS\_POS\_500-2000\_RES\_7min ACN\_Form\_5-98\_040\_7min 1:C,8 10.000000 MS\_Tune Col#43

**Elemental Composition Report:**

Tolerance = 5.0 PPM / DBE: min = -1.5, max = 50.0  
Element prediction: Off  
Number of isotope peaks used for i-FIT = 3

Monoisotopic Mass, Even Electron Ions  
293 formula(e) evaluated with 1 results within limits (all results (up to 1000) for each mass)  
Elements Used:  
C: 0-75 H: 1-110 N: 1-10 O: 0-23 F: 15-15

| Mass      | RA     | Calc. Mass | mDa | PPM | DBE  | i-FIT | Norm | Conf(%) | Formula            |
|-----------|--------|------------|-----|-----|------|-------|------|---------|--------------------|
| 1703.3945 | 100.00 | 1703.3940  | 0.5 | 0.3 | 38.5 | 672.3 | n/a  | n/a     | C75 H66 N6 O23 F15 |

**1004 Zogota RZE-16**

HRMS\_2019\_08\_437 1210 (3.392) Cm (1209:1224)

1: TOF MS ES+  
9.93e6

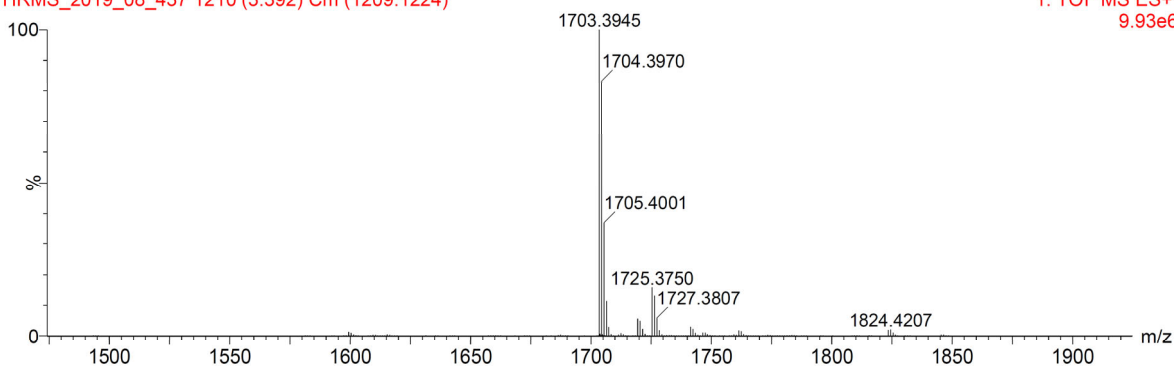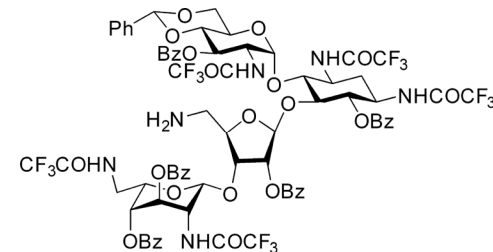

5''-Deoxy-5''-(*O*-benzylcarbamoyl)-6,3',2'',3''',4''''-penta-*O*-benzoyl-4',6'-*O*-benzylidene-1,3,2',2''',6''''-penta-*N*-trifluoroacetyl paromomycin (22)

[<sup>1</sup>H-NMR, 600 MHz, CDCl<sub>3</sub>]

OSPT2-RZE-31-prep2.1.fid

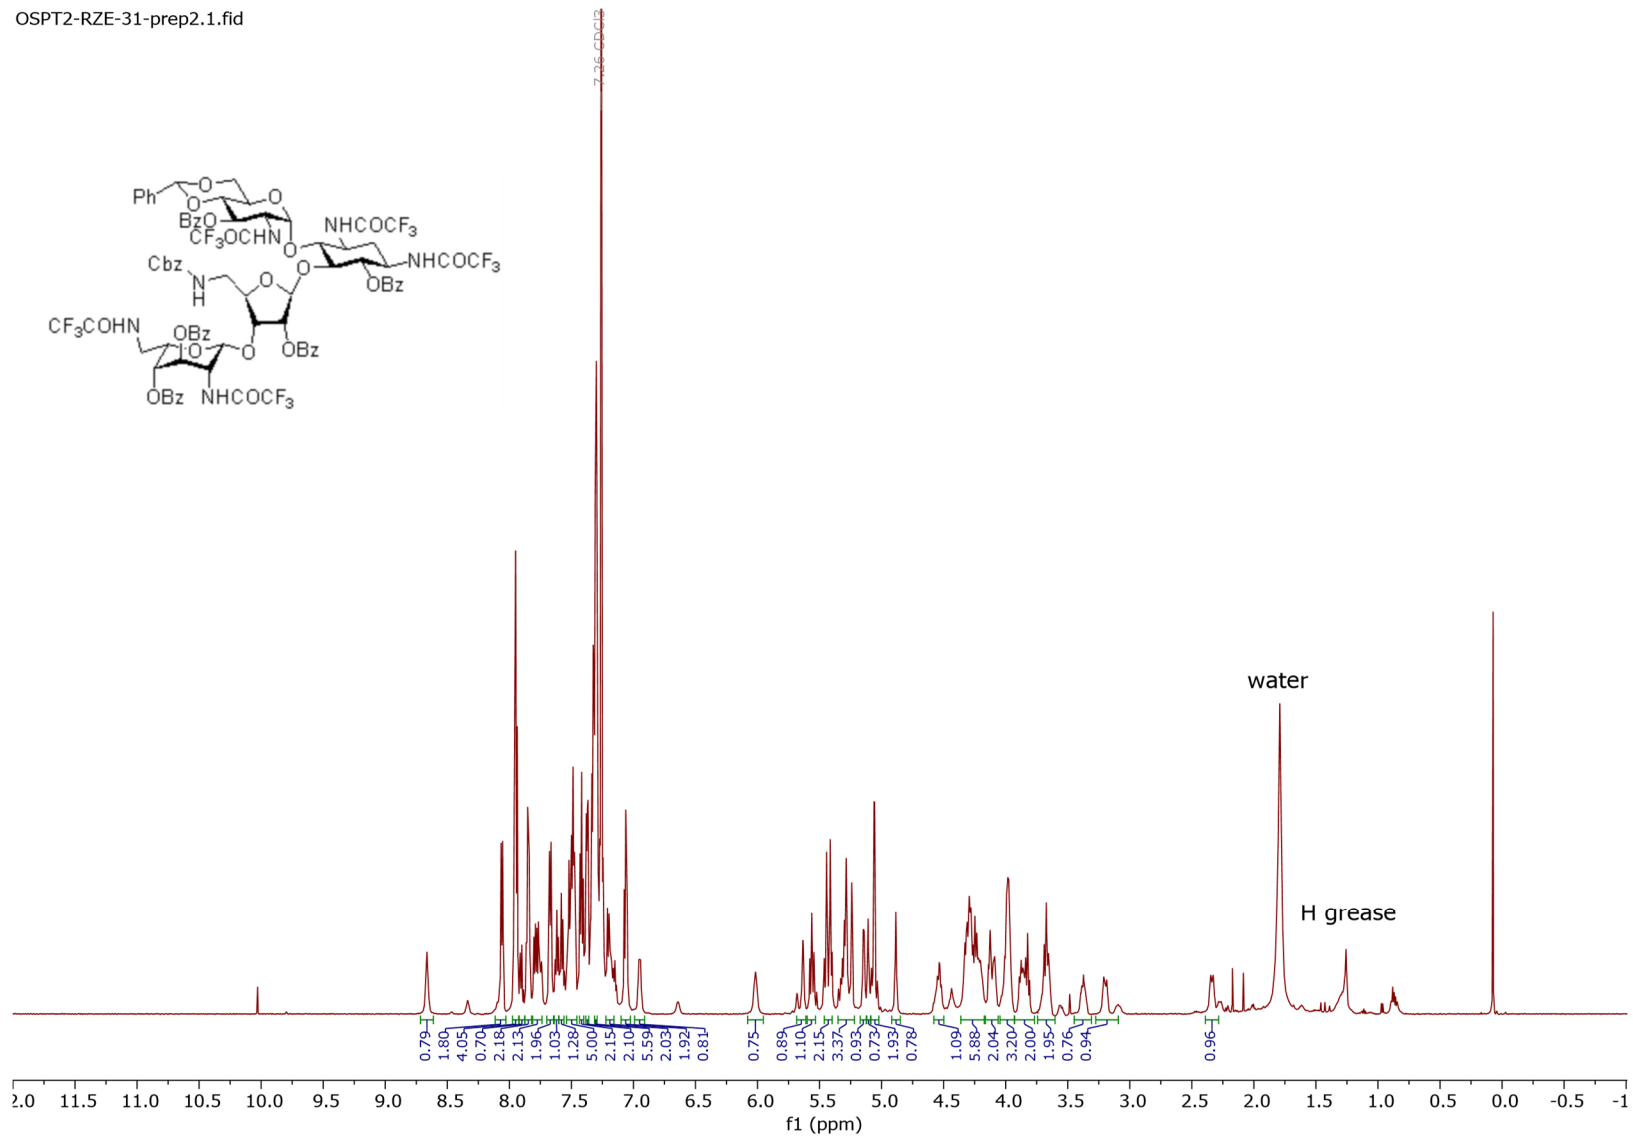

**5''-Deoxy-5''-(*O*-benzylcarbamoyl)-6,3',2'',3''',4'''-penta-*O*-benzoyl-4',6'-*O*-benzylidene-1,3,2',2''',6'''-penta-*N*-trifluoroacetyl paromomycin (22)**

[<sup>13</sup>C-NMR, 150.9 MHz, CDCl<sub>3</sub>]

OSPT2-RZE-31-prep2.4.fid

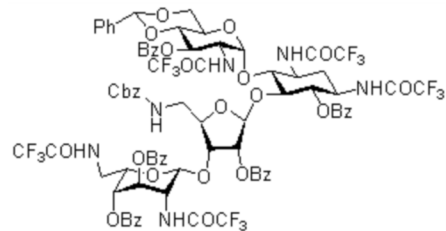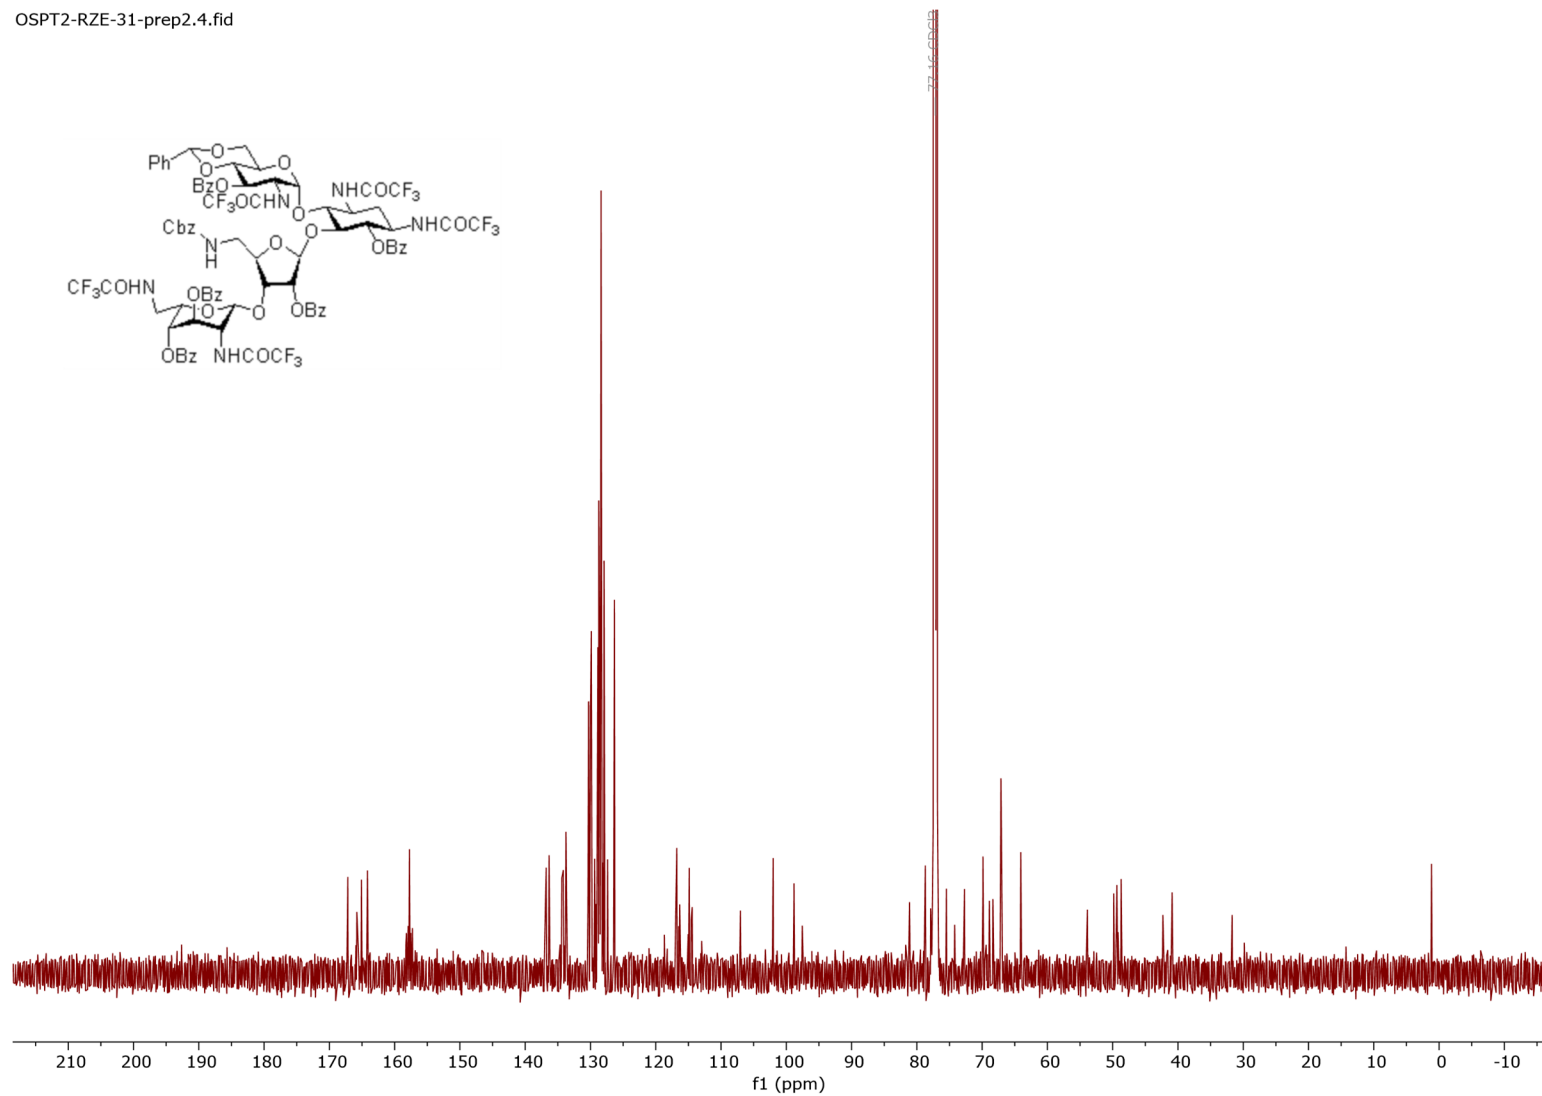



**5''-Deoxy-5''-(*O*-benzylcarbamoyl)-6,3',2'',3''',4''-penta-*O*-benzoyl-4',6'-*O*-benzylidene-1,3,2',2''',6''-penta-*N*-trifluoroacetyl paromomycin (22)**

Latvijas Organiskās sintēzes institūts  
Fizikāli organiskās ķīmijas laboratorija

**MS: Waters Synapt G2-Si** Capillary, kV: 0.7      **LC: Acquity UPLC H-Class** Column: Acquity UPLC BEH C18  
**ESI+** Cone, V: 40      2.1x50mm, 1.7µm

**Sample:**

HRMS\_2019\_08\_439 1005 Zogota RZE-31

MS\_POS\_500-2000\_RES\_7min ACN\_Form\_5-98\_040\_7min 1:D,1 10.000000 MS\_Tune Col#43

**Elemental Composition Report:**

Tolerance = 5.0 PPM / DBE: min = -1.5, max = 50.0

Element prediction: Off

Number of isotope peaks used for i-FIT = 3

Monoisotopic Mass, Even Electron Ions

290 formula(e) evaluated with 1 results within limits (all results (up to 1000) for each mass)

Elements Used:

C: 0-83 H: 1-110 N: 1-10 O: 0-25 F: 15-15 Na: 1-1

| Mass      | RA     | Calc. Mass | mDa  | PPM  | DBE  | i-FIT | Norm | Conf(%) | Formula               |
|-----------|--------|------------|------|------|------|-------|------|---------|-----------------------|
| 1859.4125 | 100.00 | 1859.4127  | -0.2 | -0.1 | 43.5 | 485.1 | n/a  | n/a     | C83 H71 N6 O25 F15 Na |

**1005 Zogota RZE-31**

HRMS\_2019\_08\_439 1584 (4.431) Cm (1580:1591-(1558:1565+1622:1629))

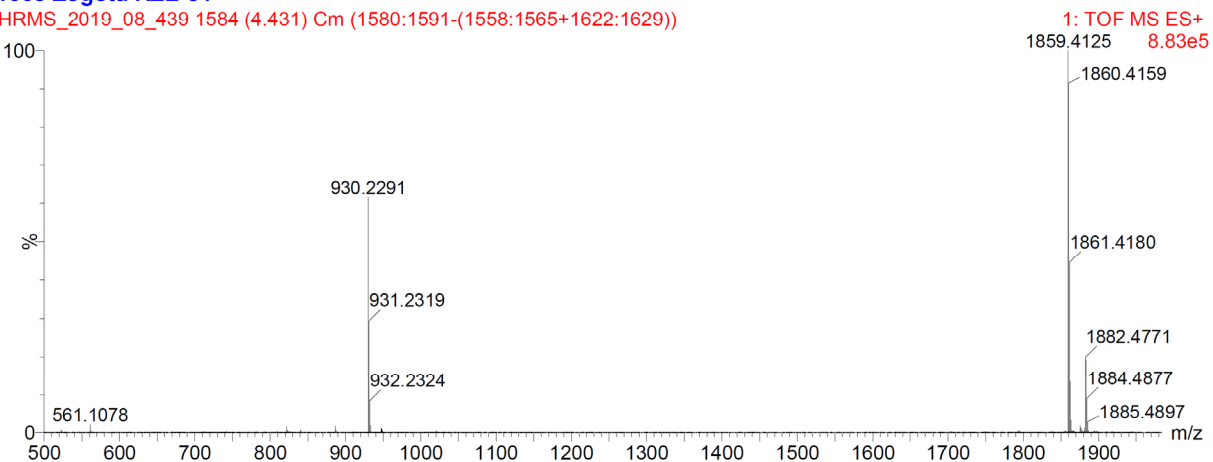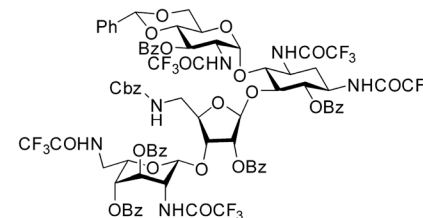

5''-Deoxy-5''-(*O*-benzylcarbamoyl)-6,3',2'',3''',4'''-penta-*O*-benzoyl-1,3,2',2''',6'''-penta-*N*-trifluoroacetyl paromomycin (23)

[<sup>1</sup>H-NMR, 600 MHz, CD<sub>3</sub>OD]

OSPT2-RZE-42-prep.1.fid

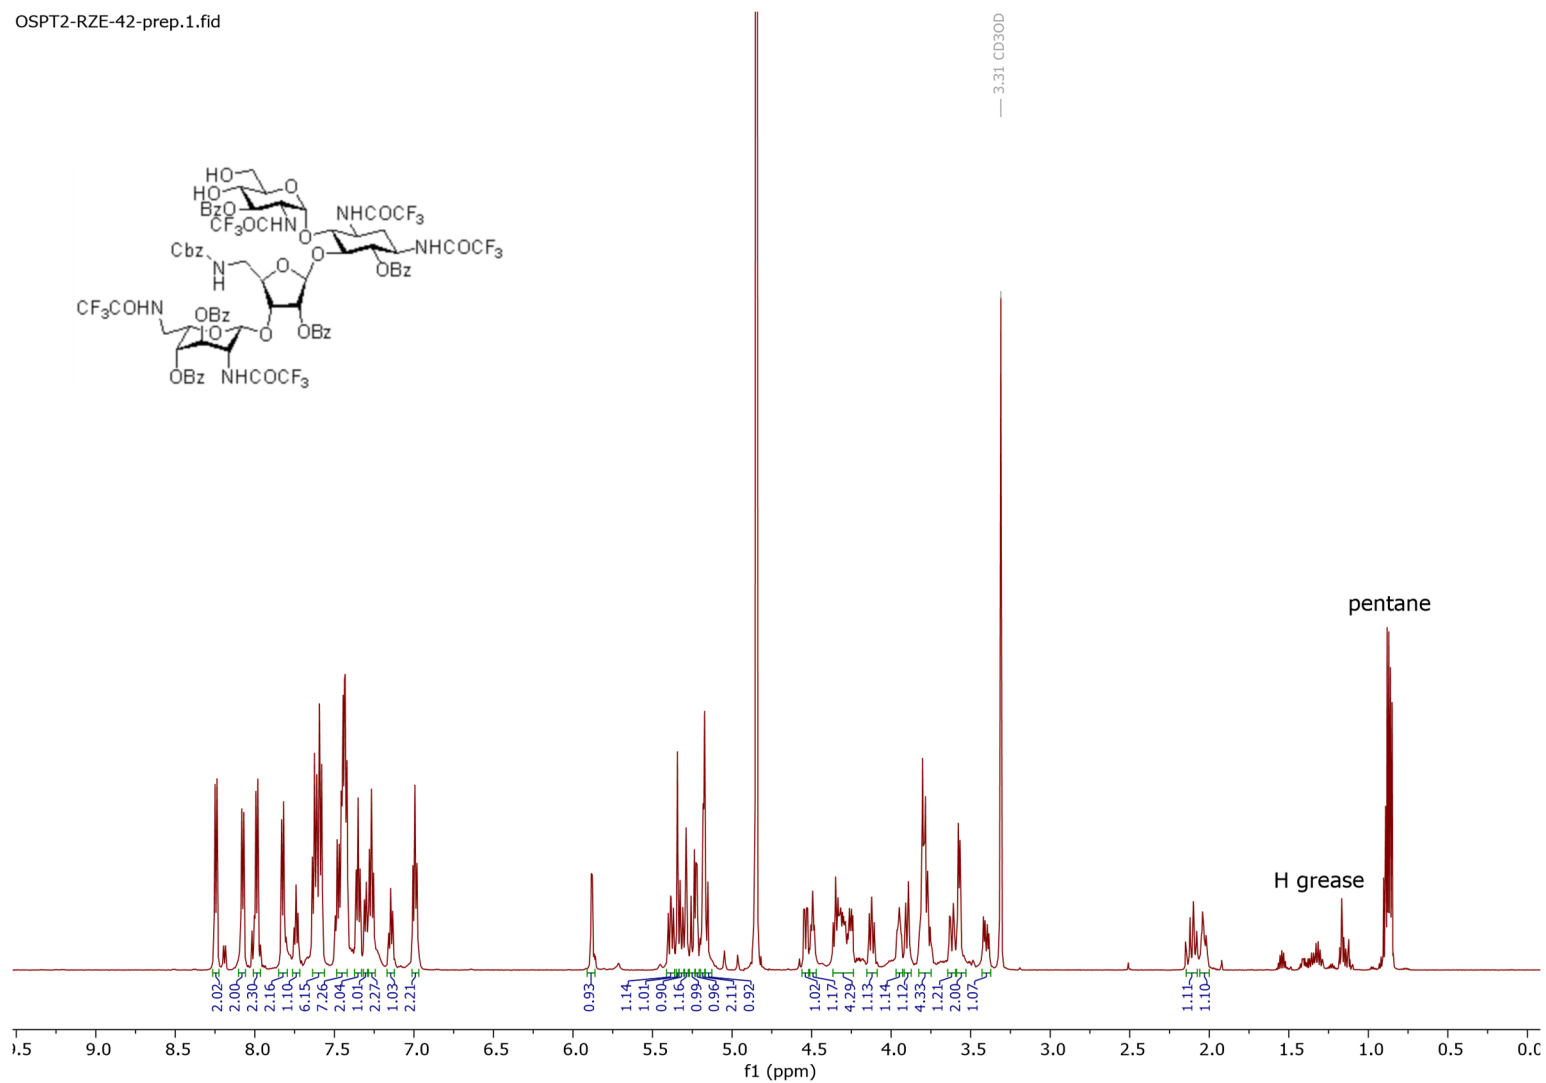

**5''-Deoxy-5''-(*O*-benzylcarbamoyl)-6,3',2'',3''',4'''-penta-*O*-benzoyl-1,3,2',2''',6'''-penta-*N*-trifluoroacetyl paromomycin (23)**

[<sup>13</sup>C-NMR, 150.9 MHz, CD<sub>3</sub>OD]

OSPT2-RZE-42-prep.4.fid

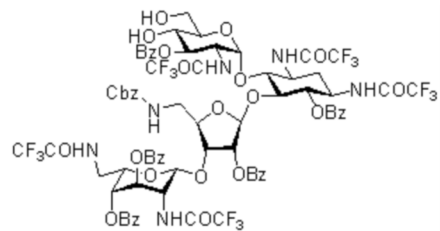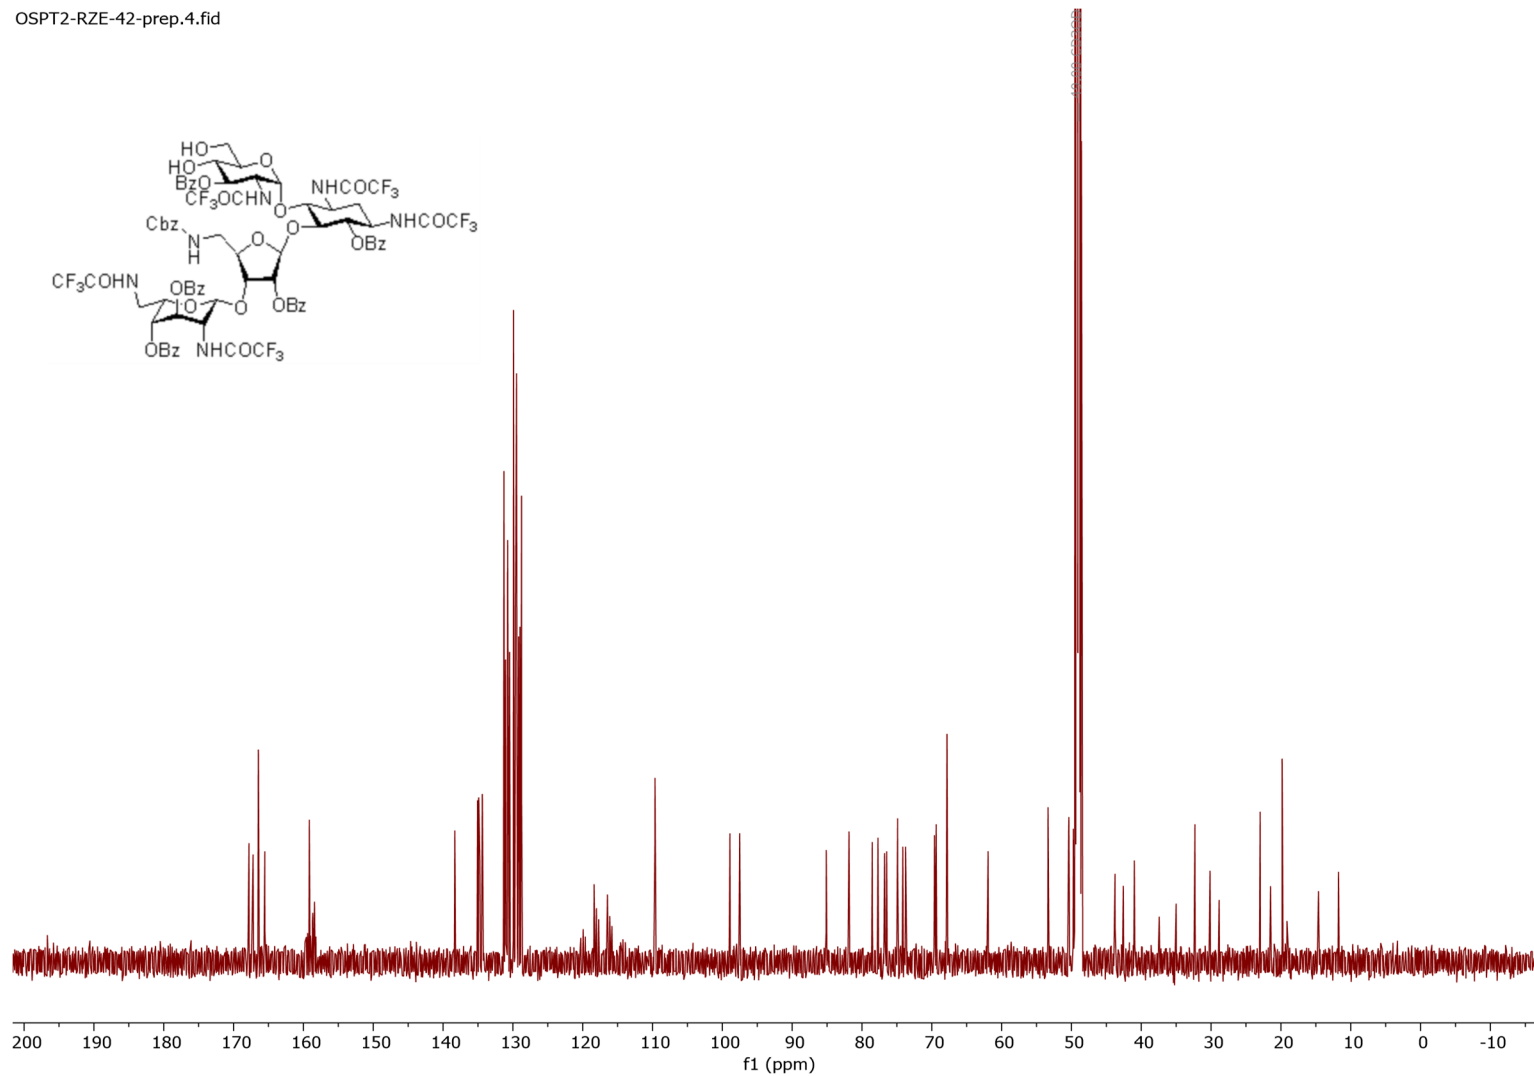

## 5''-Deoxy-5''-(*O*-benzylcarbamoyl)-6,3',2'',3''',4'''-penta-*O*-benzoyl-1,3,2',2''',6'''-penta-*N*-trifluoroacetyl paromomycin (23)

Latvijas Organiskās sintēzes institūts  
Fizikāli organiskās ķīmijas laboratorija

**MS: Waters Synapt G2-Si** Capillary, kV: 0.7      **LC: Acquity UPLC H-Class** Column: Acquity UPLC BEH C18  
**ESI+** Cone, V: 40      2.1x50mm, 1.7µm

### Sample:

HRMS\_2019\_08\_441 1006 Zogota RZE-42

MS\_POS\_500-2000\_RES\_7min ACN\_Form\_5-98\_040\_7min 1:D,2 10.000000 MS\_Tune Col#43

### Elemental Composition Report:

Tolerance = 5.0 PPM / DBE: min = -1.5, max = 50.0

Element prediction: Off

Number of isotope peaks used for i-FIT = 3

Monoisotopic Mass, Even Electron Ions

307 formula(e) evaluated with 2 results within limits (all results (up to 1000) for each mass)

Elements Used:

C: 0-76 H: 1-110 N: 1-10 O: 0-25 F: 15-15 Na: 1-1

| Mass      | RA     | Calc. Mass | mDa  | PPM  | DBE  | i-FIT | Norm  | Conf(%) | Formula               |
|-----------|--------|------------|------|------|------|-------|-------|---------|-----------------------|
| 1771.3860 | 100.00 | 1771.3814  | 4.6  | 2.6  | 38.5 | 533.3 | 0.427 | 65.26   | C76 H67 N6 O25 F15 Na |
|           |        | 1771.3926  | -6.6 | -3.7 | 38.5 | 533.9 | 1.057 | 34.74   | C75 H67 N8 O24 F15 Na |

### 1006 Zogota RZE-42

HRMS\_2019\_08\_441 1489 (4.166) Cm (1488:1502-(1458:1472+1549:1558))

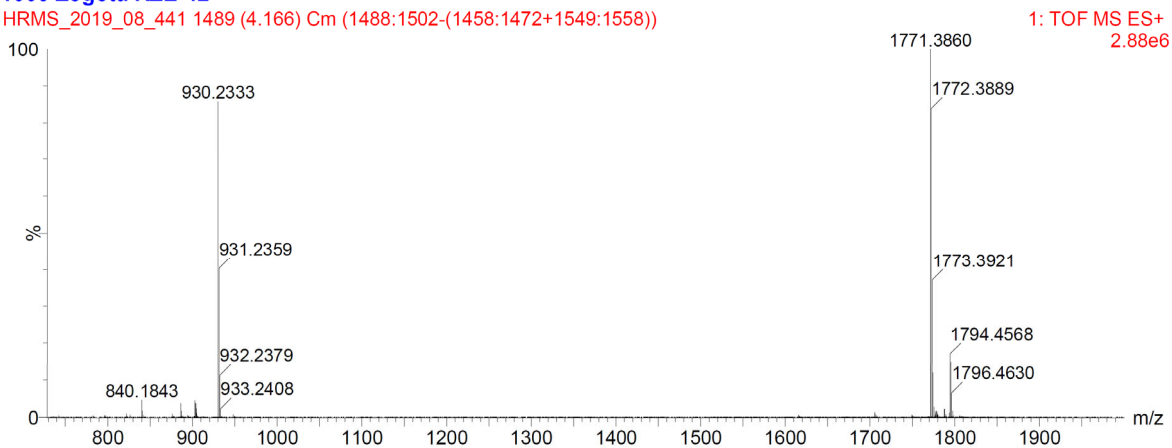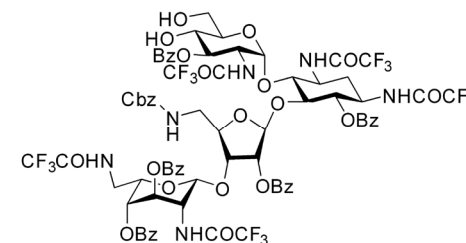

5''-Deoxy-5''-(*O*-benzylcarbamoyl)-6,3',6',2'',3''',4'''-hexa-*O*-benzoyl-1,3,2',2''',6'''-penta-*N*-trifluoroacetyl paromomycin (24)

[<sup>1</sup>H-NMR, 600 MHz, CD<sub>3</sub>OD]

OSPT2-RZE-43-prep.1.fid

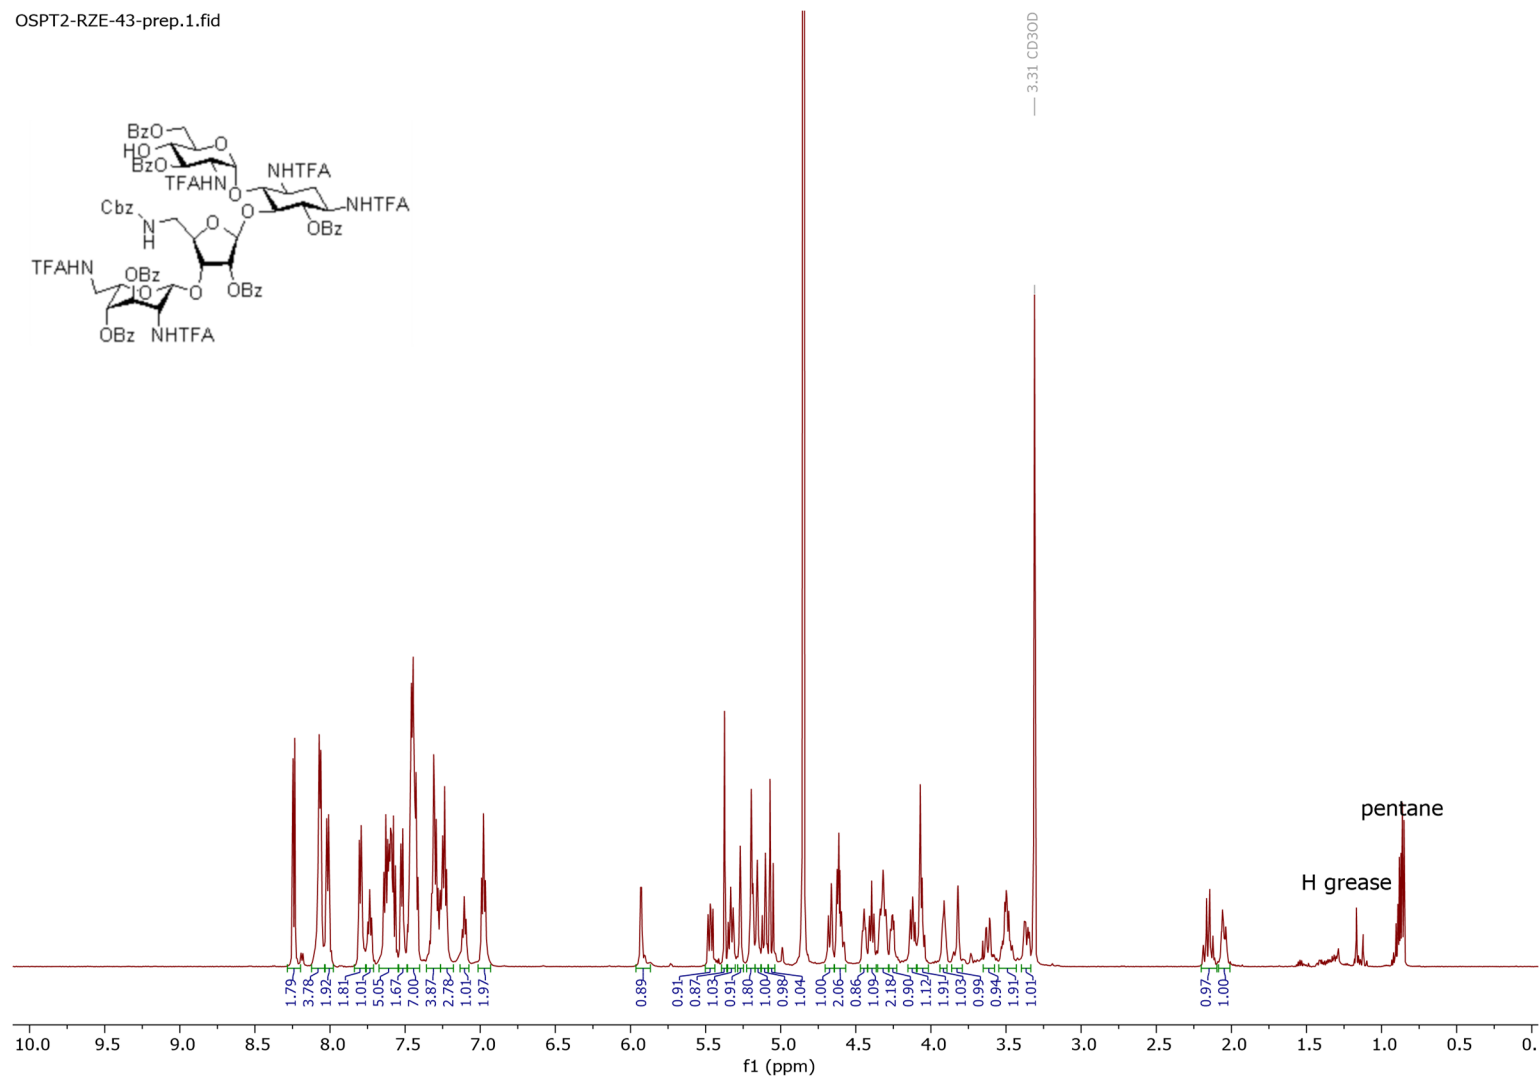

**5''-Deoxy-5''-(*O*-benzylcarbamoyl)-6,3',6',2'',3''',4'''-hexa-*O*-benzoyl-1,3,2',2''',6'''-penta-*N*-trifluoroacetyl paromomycin (24)**

[<sup>13</sup>C-NMR, 150.9 MHz, CD<sub>3</sub>OD]

OSPT2-RZE-43-prep.4.fid

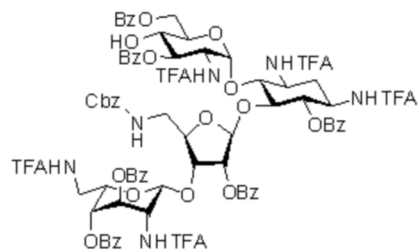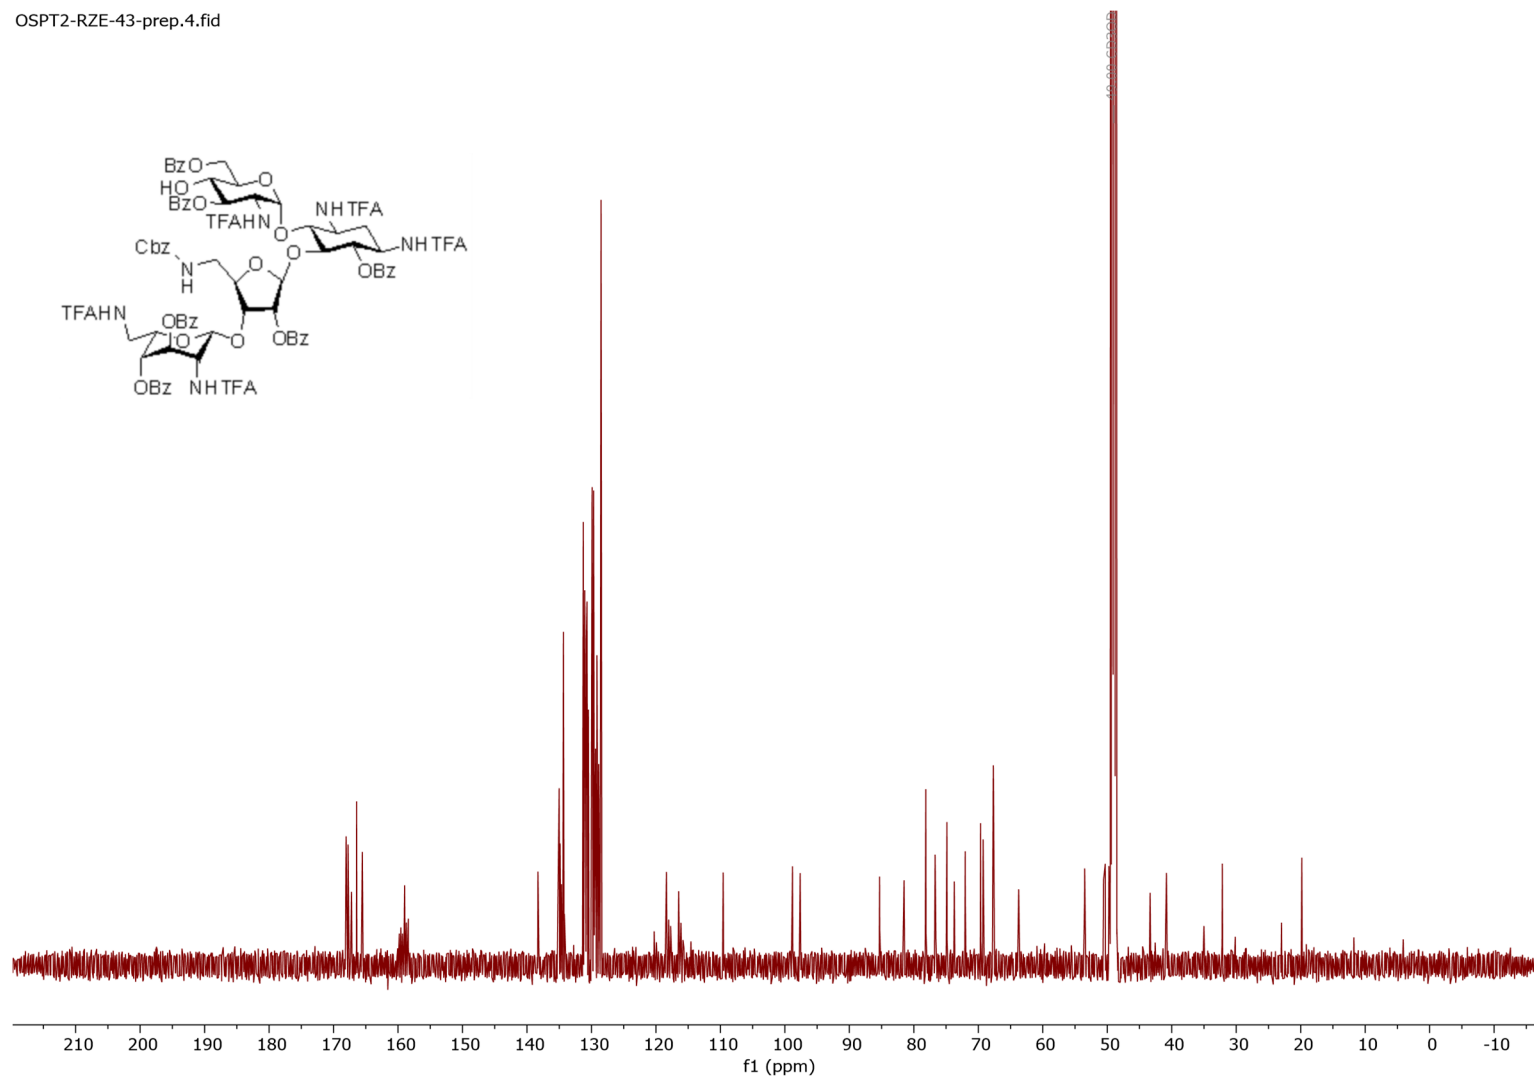

5''-Deoxy-5''-(*O*-benzylcarbamoyl)-6,3',6',2'',3''',4'''-hexa-*O*-benzoyl-1,3,2',2''',6'''-penta-*N*-trifluoroacetyl paromomycin (24)

[<sup>1</sup>H, <sup>13</sup>C HSQC, 600 MHz, 150.9 MHz, CD<sub>3</sub>OD]

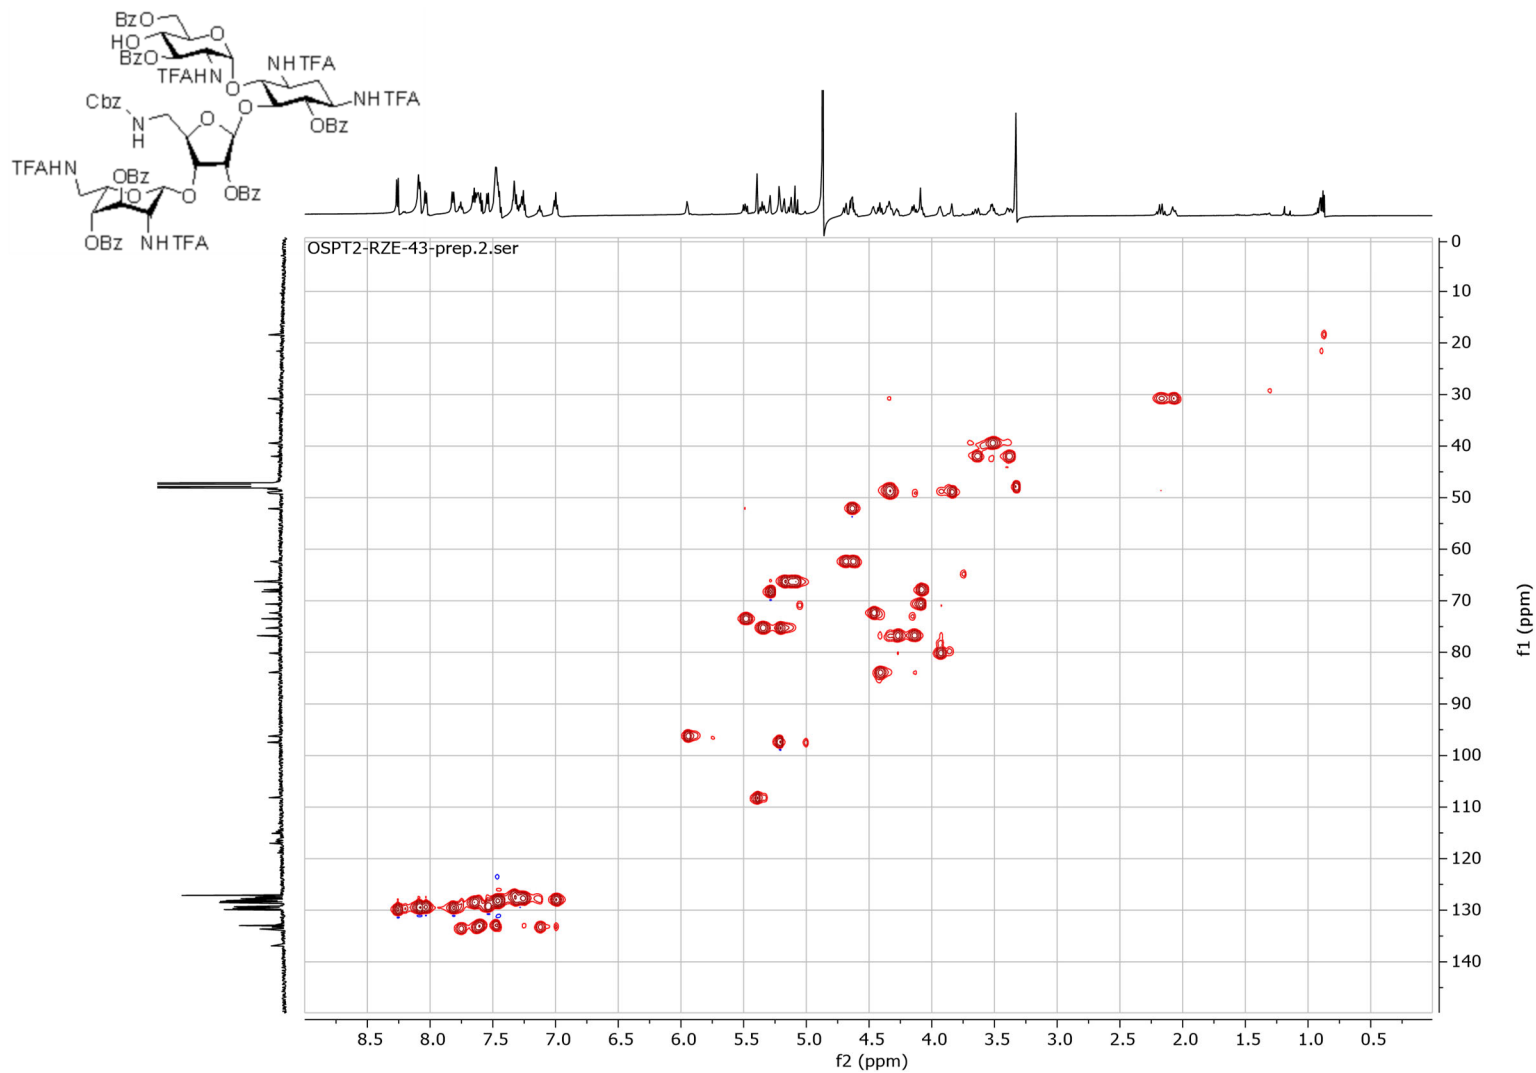

5''-Deoxy-5''-(*O*-benzylcarbamoyl)-6,3',6',2'',3''',4'''-hexa-*O*-benzoyl-1,3,2',2''',6'''-penta-*N*-trifluoroacetyl paromomycin (24)

[<sup>1</sup>H, <sup>13</sup>C HMBC, 600 MHz, 150.9 MHz, CD<sub>3</sub>OD]

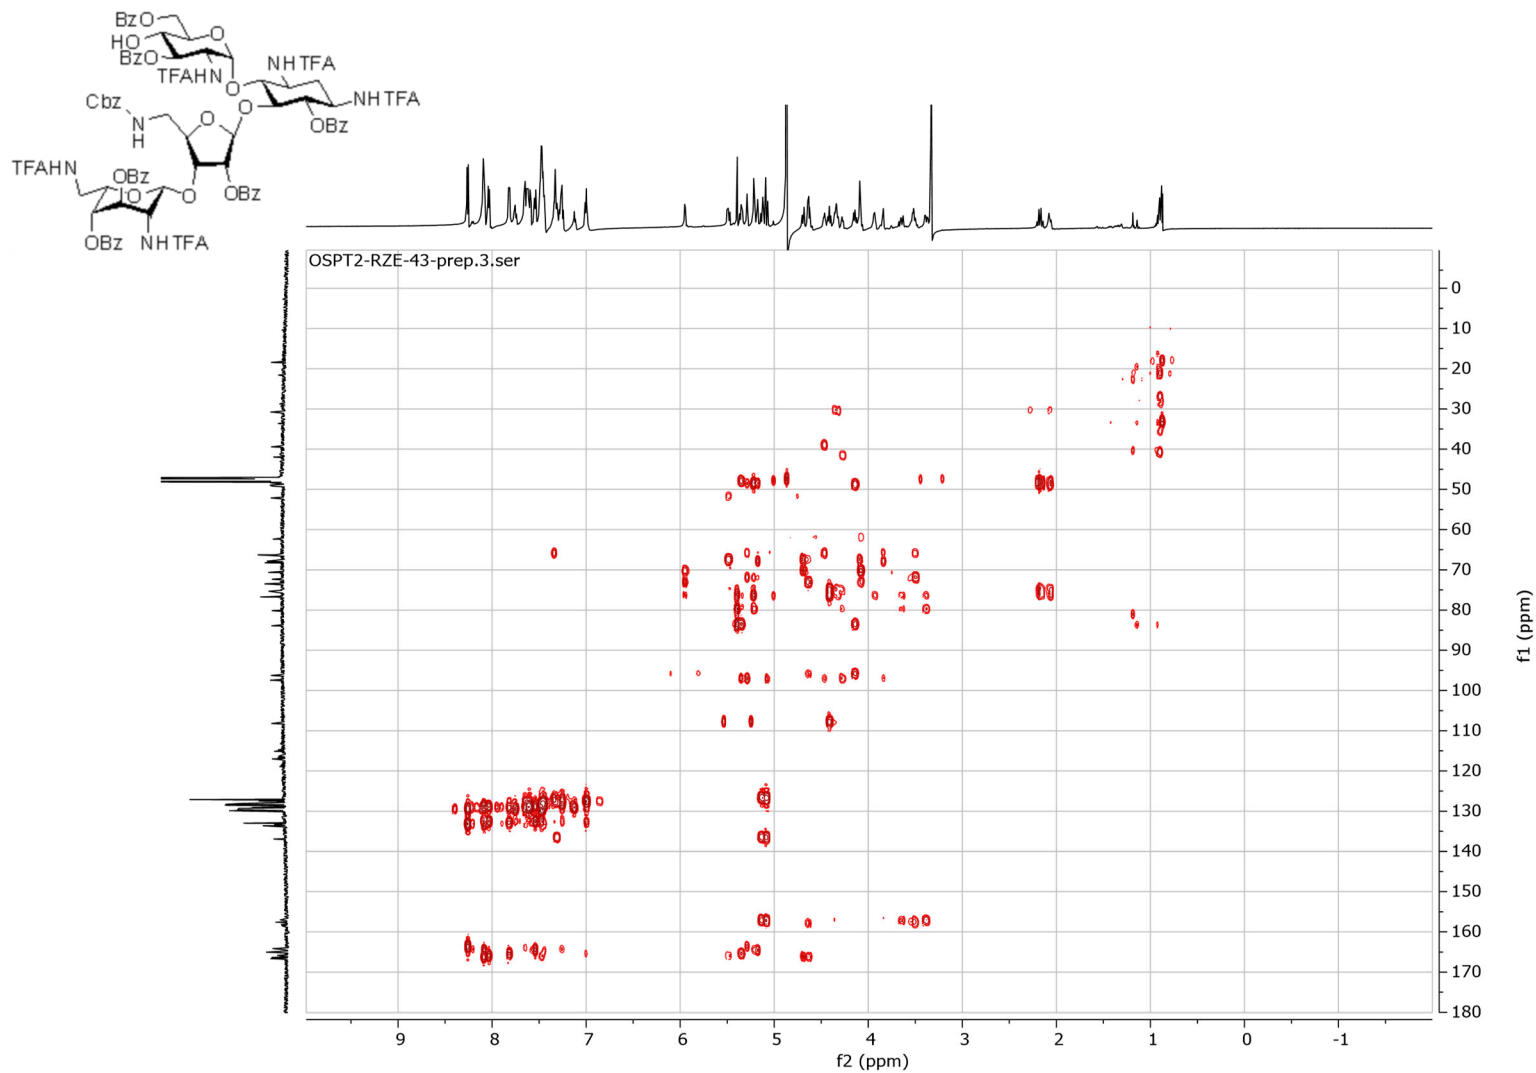



5''-Deoxy-5''-(*O*-benzylcarbamoyl)-6,3',6',2'',3''',4'''-hexa-*O*-benzoyl-1,3,2',2''',6'''-penta-*N*-trifluoroacetyl paromomycin (24)

[<sup>1</sup>H, <sup>1</sup>H ROESY, 600 MHz, CD<sub>3</sub>OD]

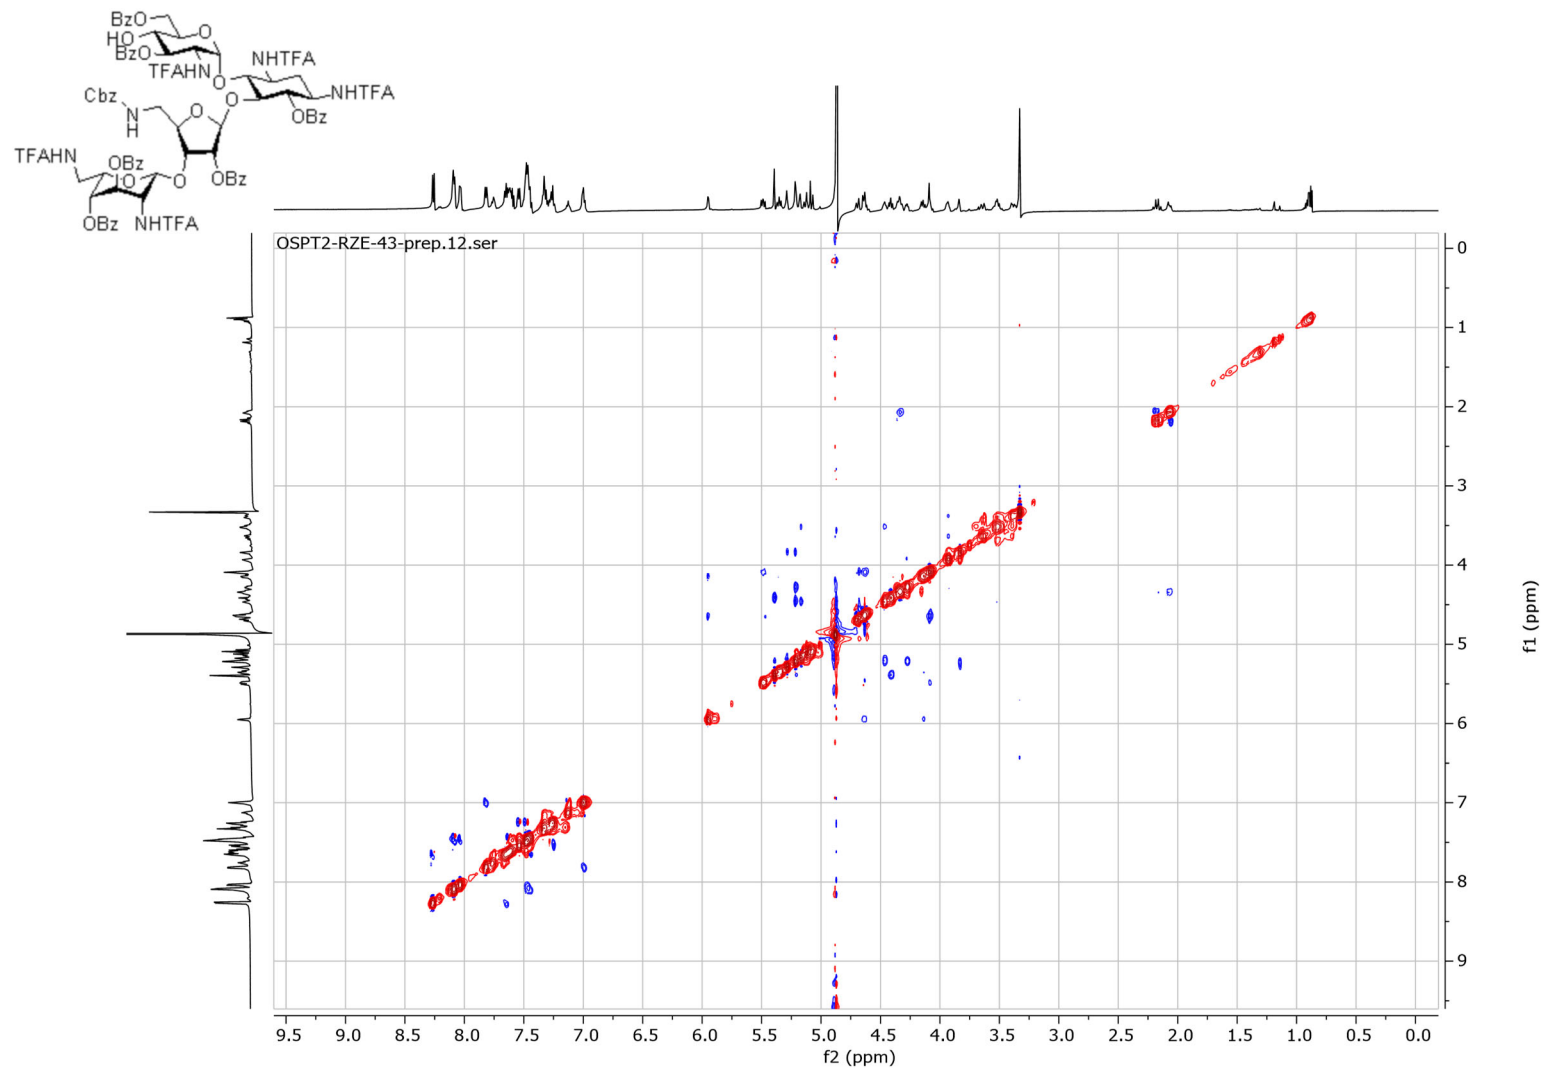

5''-Deoxy-5''-(*O*-benzylcarbamoyl)-6,3',6',2'',3''',4'''-hexa-*O*-benzoyl-1,3,2',2''',6'''-penta-*N*-trifluoroacetyl paromomycin (24)

[<sup>1</sup>H, <sup>1</sup>H COSY, 600 MHz, CD<sub>3</sub>OD]

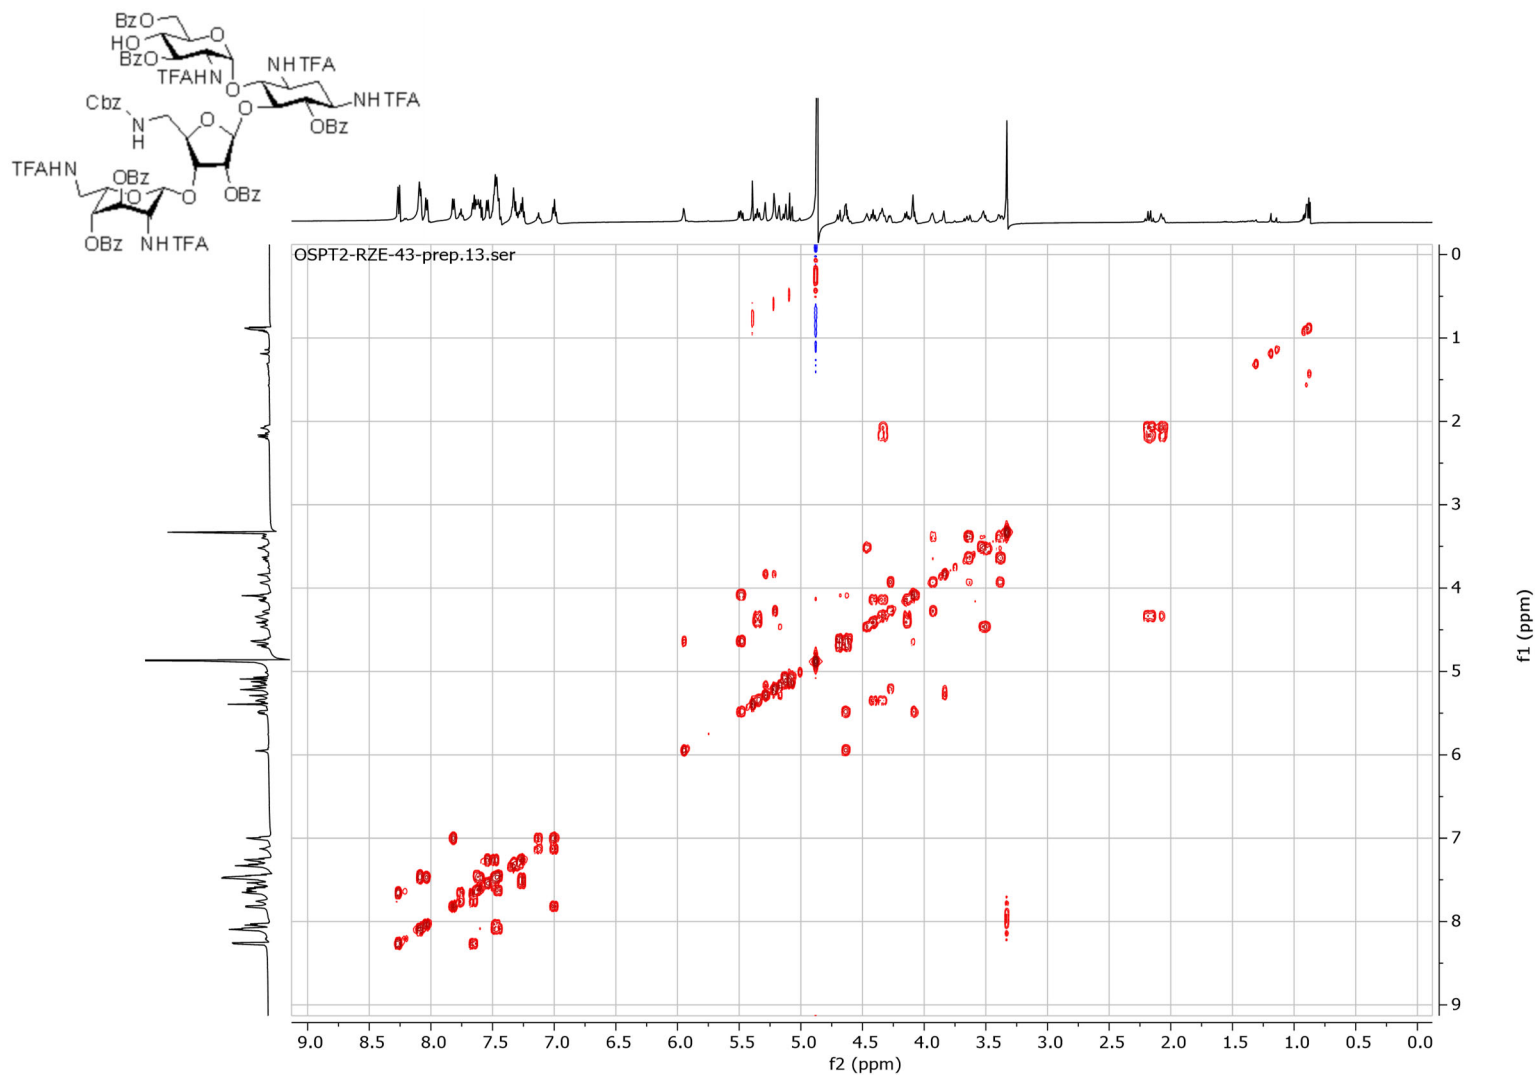

5''-Deoxy-5''-(*O*-benzylcarbamoyl)-6,3',6',2''',3''',4'''-hexa-*O*-benzoyl-1,3,2',2''',6'''-penta-*N*-trifluoroacetyl paromomycin (24)

[<sup>1</sup>H, <sup>1</sup>H DQF-COSY, 600 MHz, CD<sub>3</sub>OD]

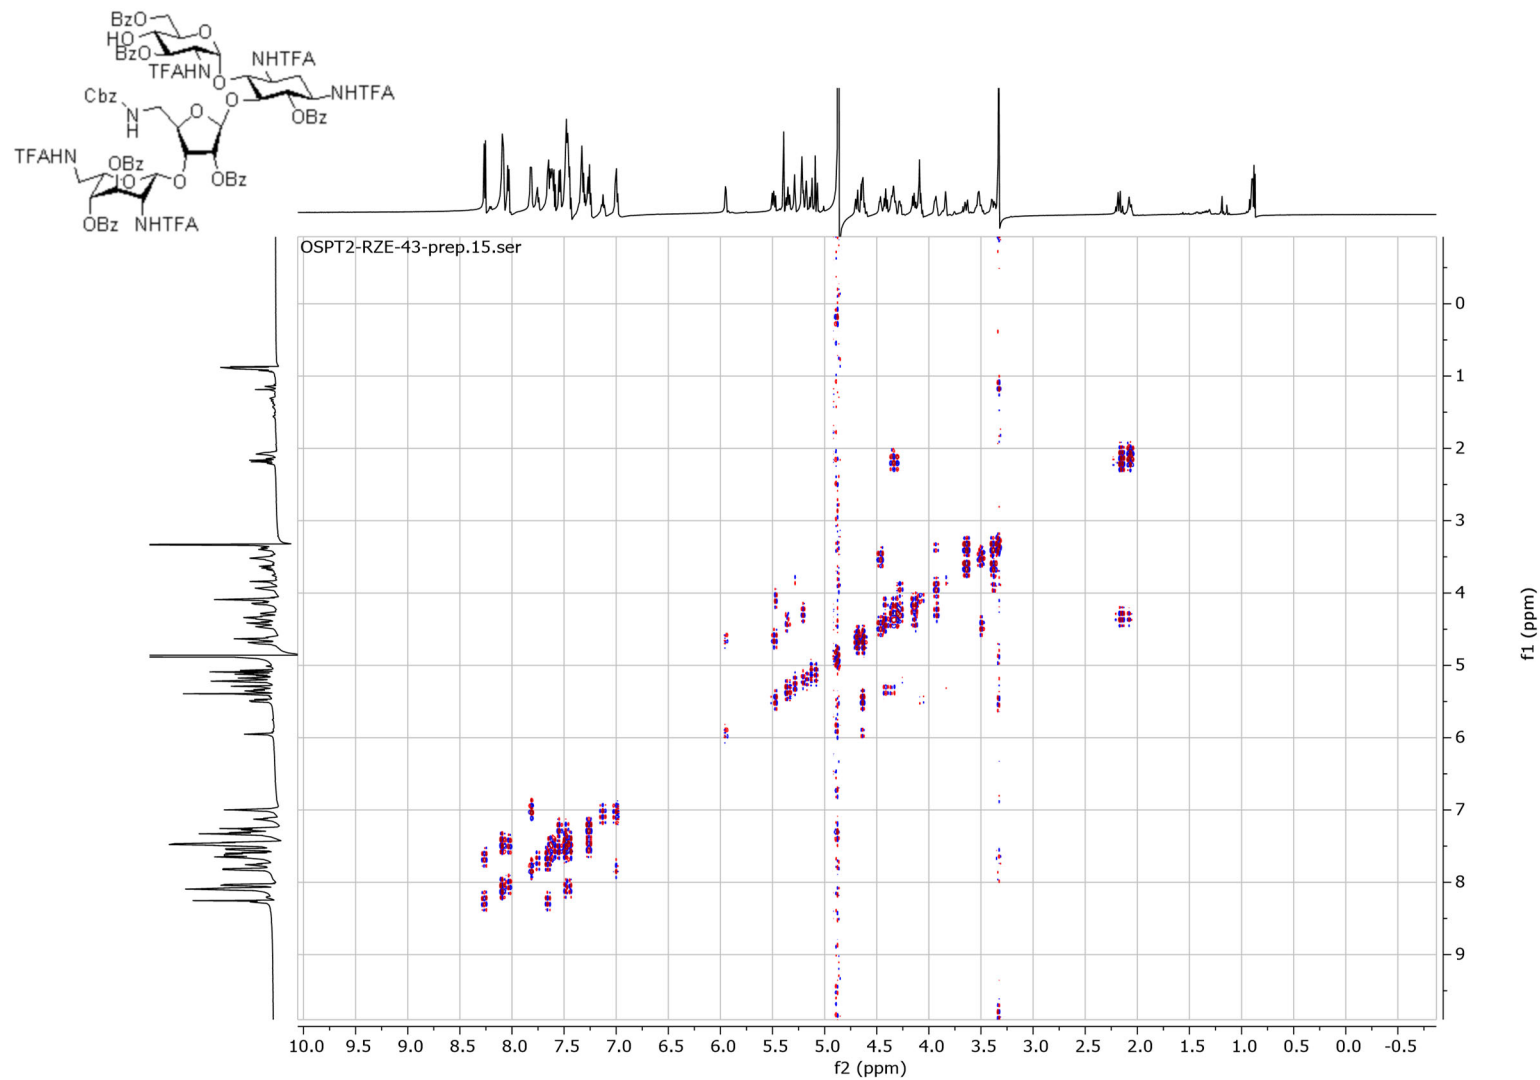

**5''-Deoxy-5''-(*O*-benzylcarbamoyl)-6,3',6',2'',3''',4''-hexa-*O*-benzoyl-1,3,2',2''',6''-penta-*N*-trifluoroacetyl paromomycin (24)**

Latvijas Organiskās sintēzes institūts  
Fizikāli organiskās ķīmijas laboratorija

|                                |                    |                                 |                              |
|--------------------------------|--------------------|---------------------------------|------------------------------|
| <b>MS: Waters Synapt G2-Si</b> | Capillary, kV: 0.7 | <b>LC: Acquity UPLC H-Class</b> | Column: Acquity UPLC BEH C18 |
| <b>ESI+</b>                    | Cone, V: 40        |                                 | 2.1x50mm, 1.7µm              |

**Sample:**

HRMS\_2019\_08\_443 1007 Zogota RZE-43

MS\_POS\_500-2000\_RES\_7min ACN\_Form\_5-98\_040\_7min 1:D,3 10.000000 MS\_Tune Col#43

**Elemental Composition Report:**

Tolerance = 5.0 PPM / DBE: min = -1.5, max = 50.0

Element prediction: Off

Number of isotope peaks used for i-FIT = 3

Monoisotopic Mass, Even Electron Ions

300 formula(e) evaluated with 1 results within limits (all results (up to 1000) for each mass)

Elements Used:

C: 0-83 H: 1-110 N: 1-10 O: 0-26 F: 15-15 Na: 1-1

| Mass      | RA     | Calc. Mass | mDa | PPM | DBE  | i-FIT | Norm | Conf(%) | Formula               |
|-----------|--------|------------|-----|-----|------|-------|------|---------|-----------------------|
| 1875.4088 | 100.00 | 1875.4076  | 1.2 | 0.6 | 43.5 | 525.9 | n/a  | n/a     | C83 H71 N6 O26 F15 Na |

**1007 Zogota RZE-43**

HRMS\_2019\_08\_443 1546 (4.322) Cm (1544:1564-(1504:1521+1595:1615))

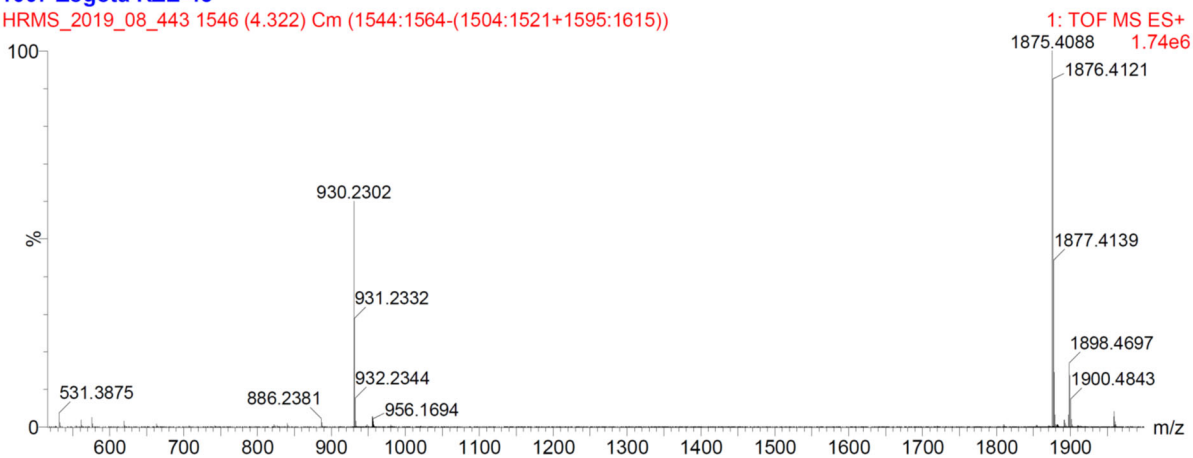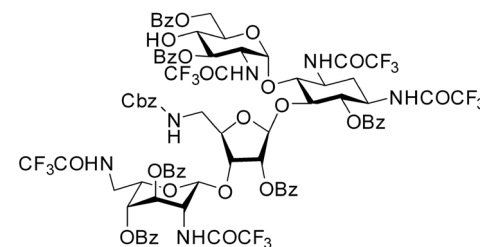

**4',5''-Dideoxy-5''-(*O*-benzylcarbamoyl)-6,3',6',2'',3''',4''''-hexa-*O*-benzoyl-4'-iodo-1,3,2',2''',6''''-penta-*N*-trifluoroacetyl 4'-*epi*-paromomycin (25)**

[<sup>1</sup>H-NMR, 600 MHz, CD<sub>3</sub>OD]

OSPT2-RZE-44-prep.1.fid

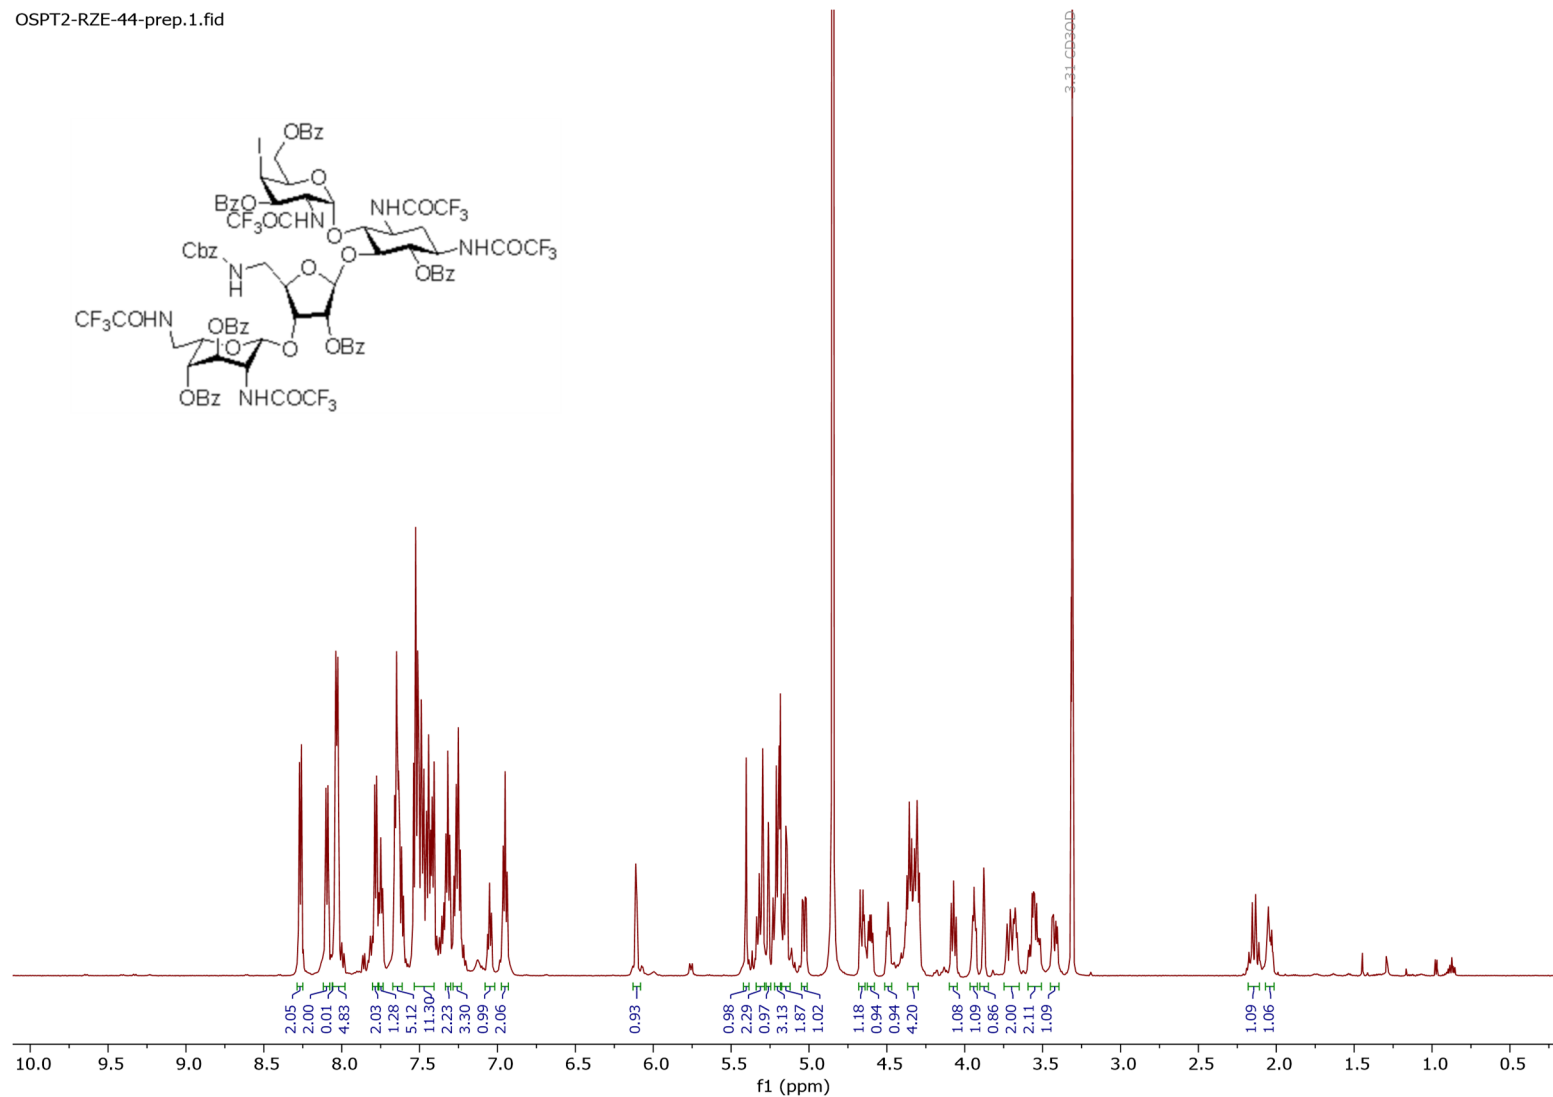

**4',5''-Dideoxy-5''-(*O*-benzylcarbamoyl)-6,3',6',2'',3''',4'''-hexa-*O*-benzoyl-4'-iodo-1,3,2',2''',6'''-penta-*N*-trifluoroacetyl 4'-*epi*-paromomycin (25)**

[<sup>13</sup>C-NMR, 150.9 MHz, CD<sub>3</sub>OD]

OSPT2-RZE-44-prep.4.fid

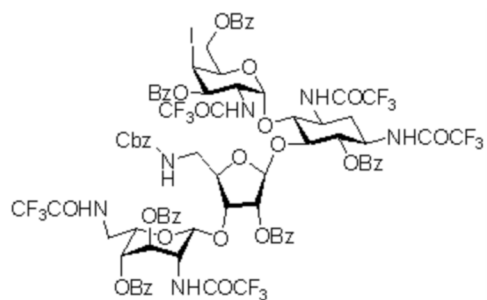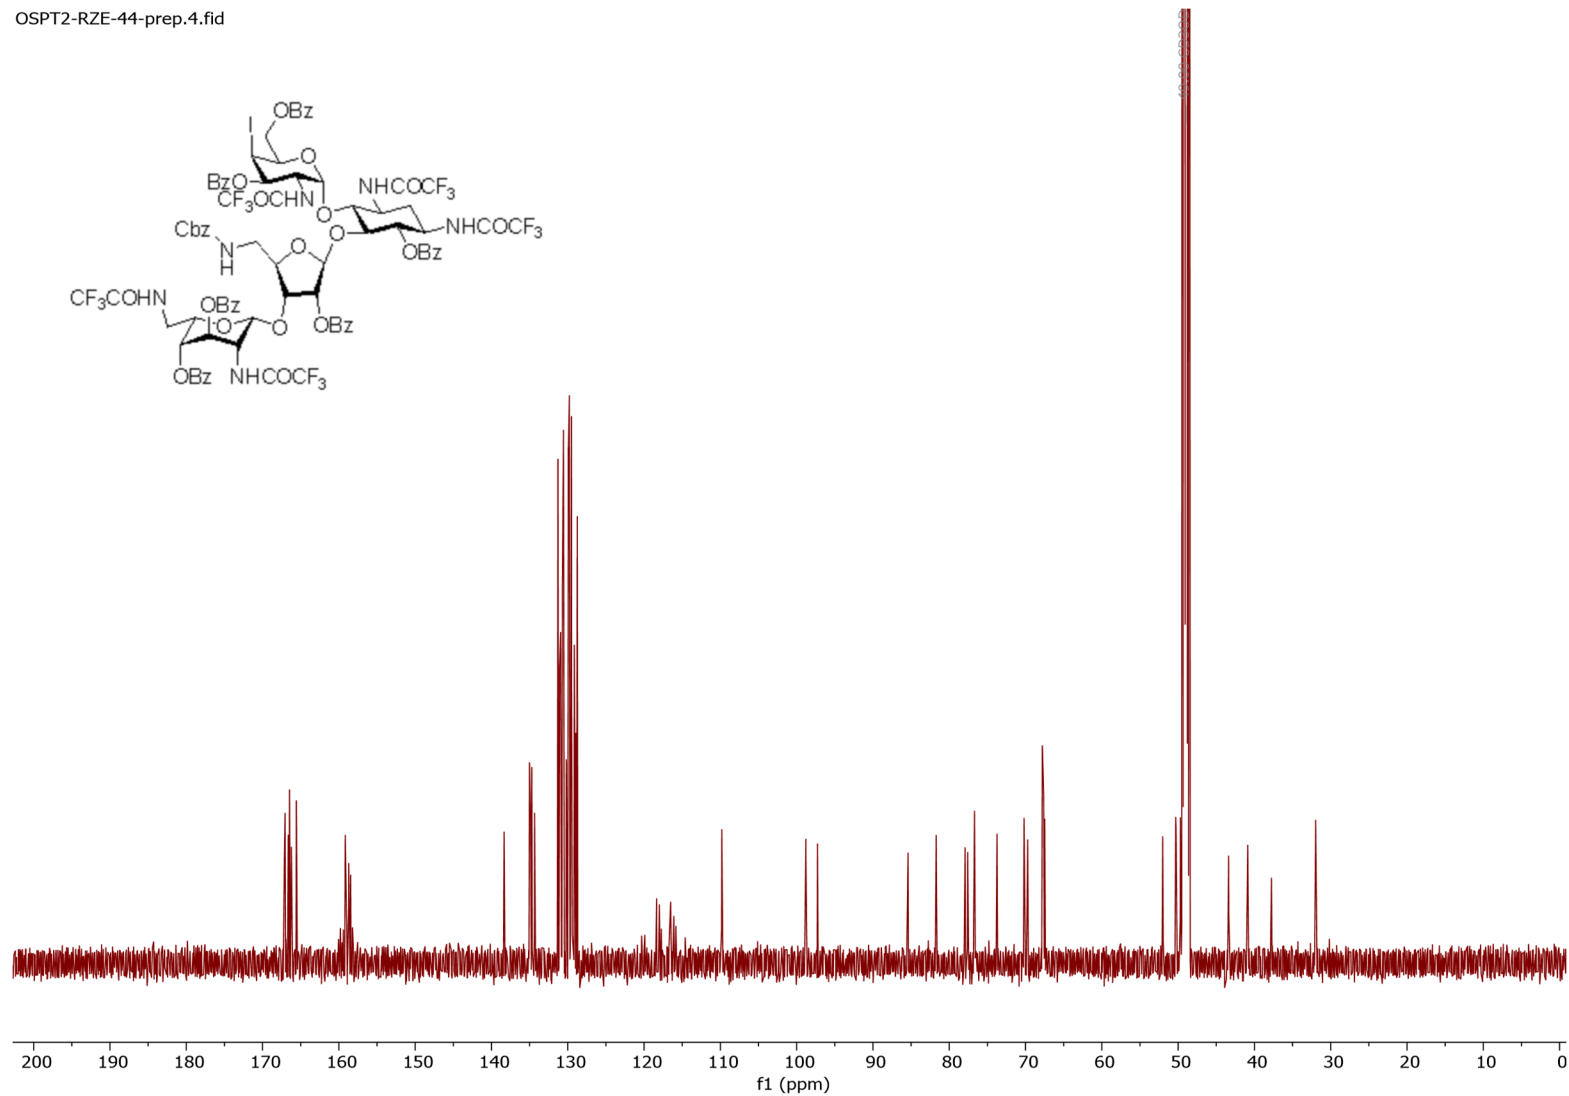

**4',5''-Dideoxy-5''-(*O*-benzylcarbamoyl)-6,3',6',2'',3''',4'''-hexa-*O*-benzoyl-4'-iodo-1,3,2',2''',6'''-penta-*N*-trifluoroacetyl 4'-*epi*-paromomycin (25)**

[<sup>1</sup>H, <sup>13</sup>C HSQC, 600 MHz, 150.9 MHz, CD<sub>3</sub>OD]

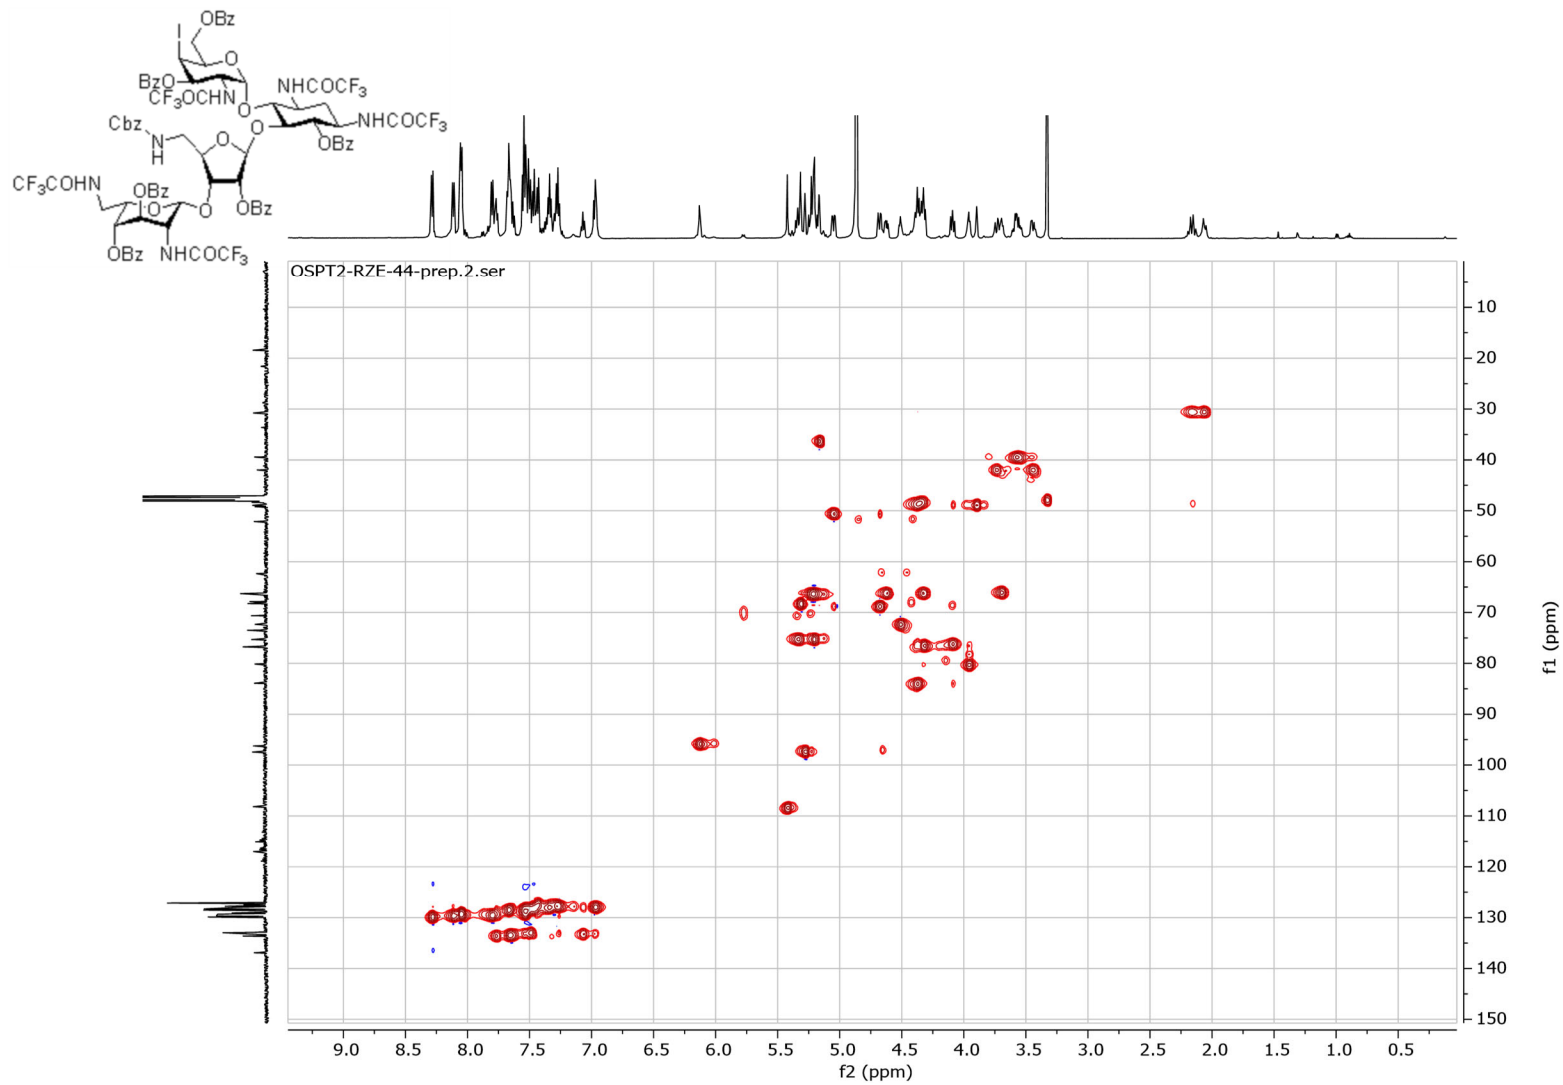

**4',5''-Dideoxy-5''-(*O*-benzylcarbamoyl)-6,3',6',2'',3''',4'''-hexa-*O*-benzoyl-4'-iodo-1,3,2',2''',6'''-penta-*N*-trifluoroacetyl 4'-*epi*-paromomycin (25)**

[<sup>1</sup>H, <sup>13</sup>C HMBC, 600 MHz, 150.9 MHz, CD<sub>3</sub>OD]

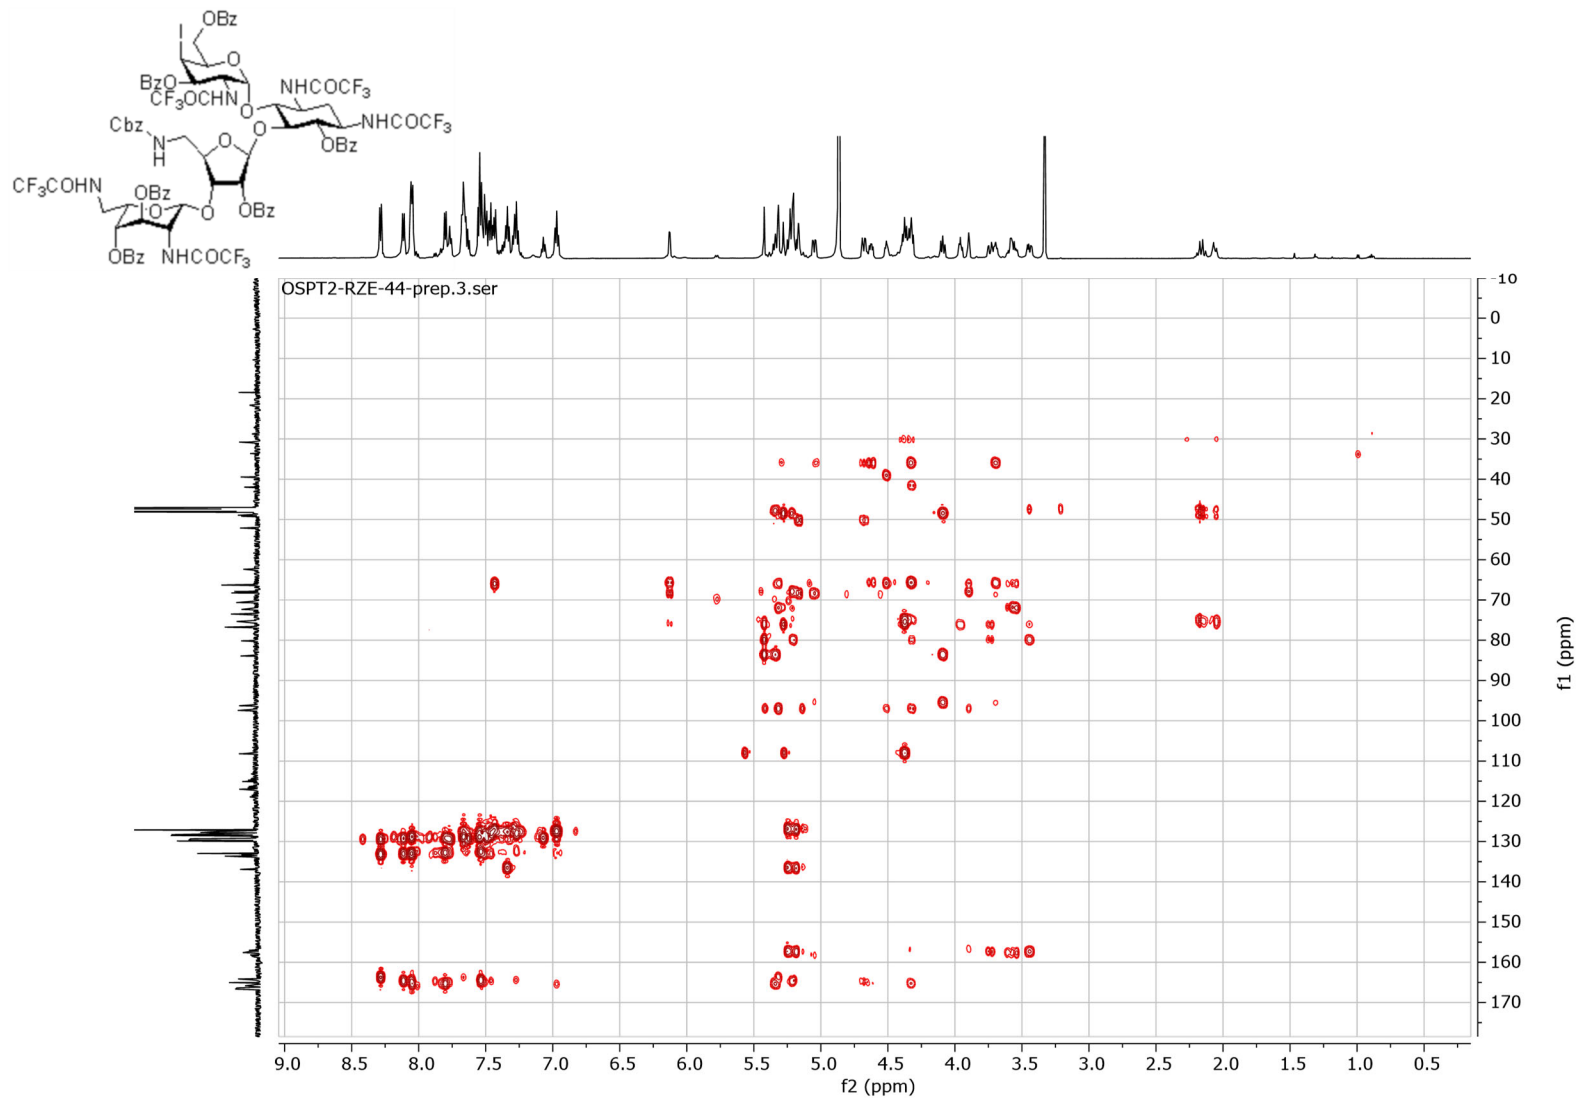



**4',5''-Dideoxy-5''-(*O*-benzylcarbamoyl)-6,3',6',2'',3''',4''''-hexa-*O*-benzoyl-4'-iodo-1,3,2',2''',6''''-penta-*N*-trifluoroacetyl 4'-*epi*-paromomycin (25)**

[<sup>1</sup>H, <sup>1</sup>H ROESY, 600 MHz, CD<sub>3</sub>OD]

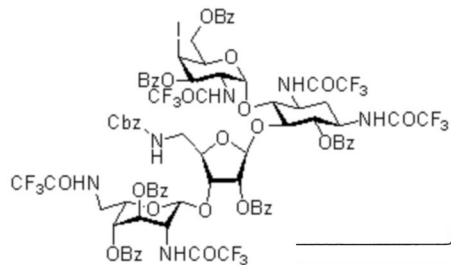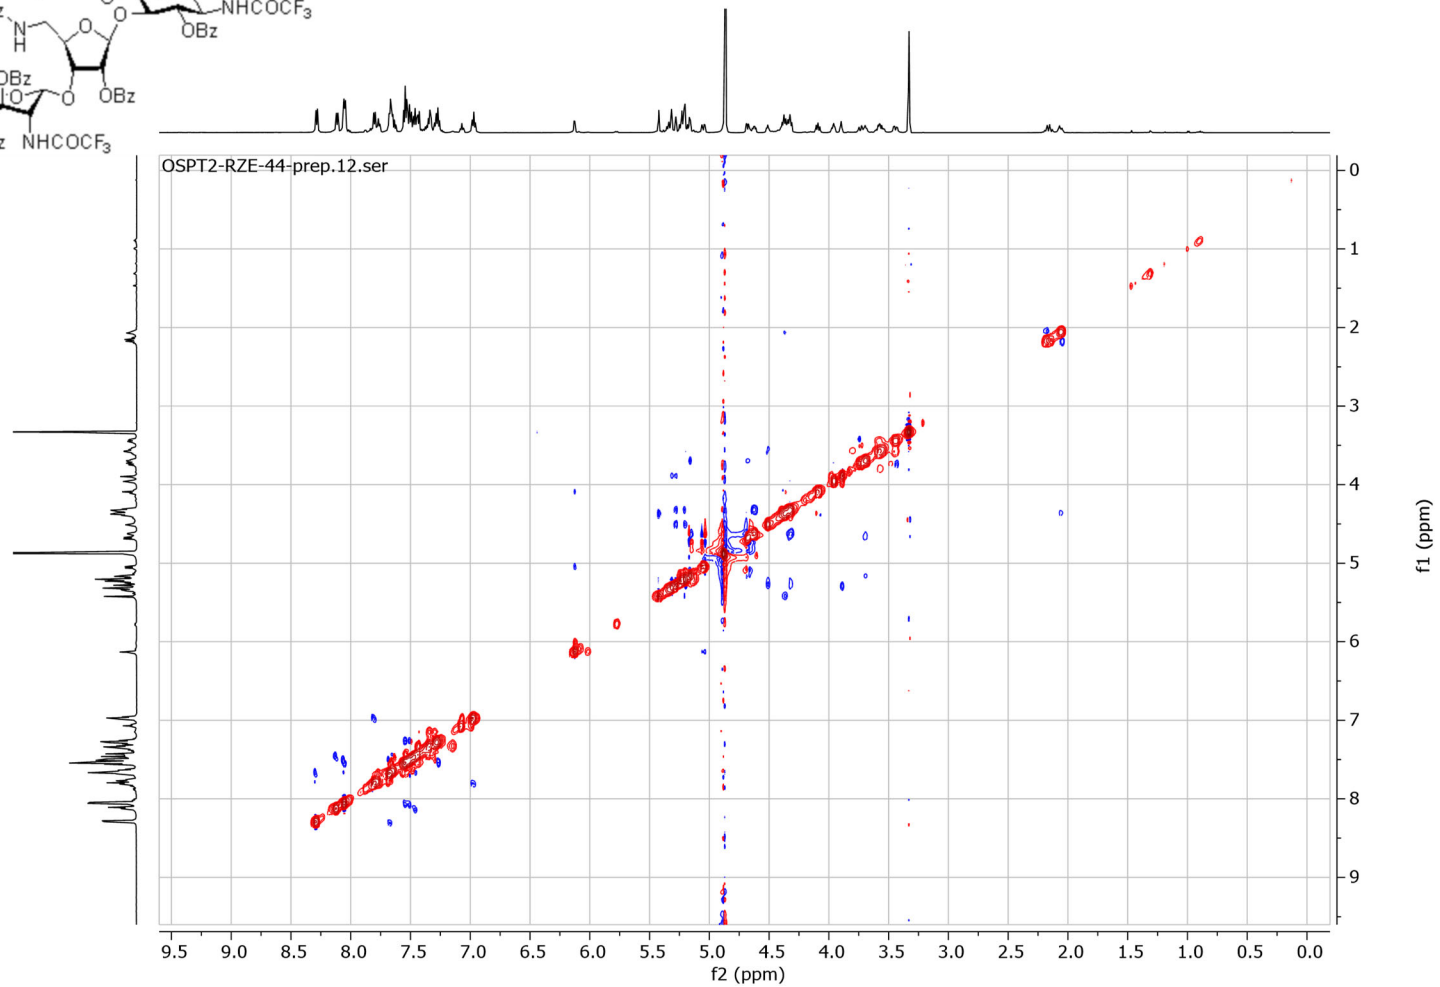

**4',5''-Dideoxy-5''-(*O*-benzylcarbamoyl)-6,3',6',2'',3''',4'''-hexa-*O*-benzoyl-4'-iodo-1,3,2',2''',6'''-penta-*N*-trifluoroacetyl 4'-*epi*-paromomycin (25)**

[<sup>1</sup>H, <sup>1</sup>H COSY, 600 MHz, CD<sub>3</sub>OD]

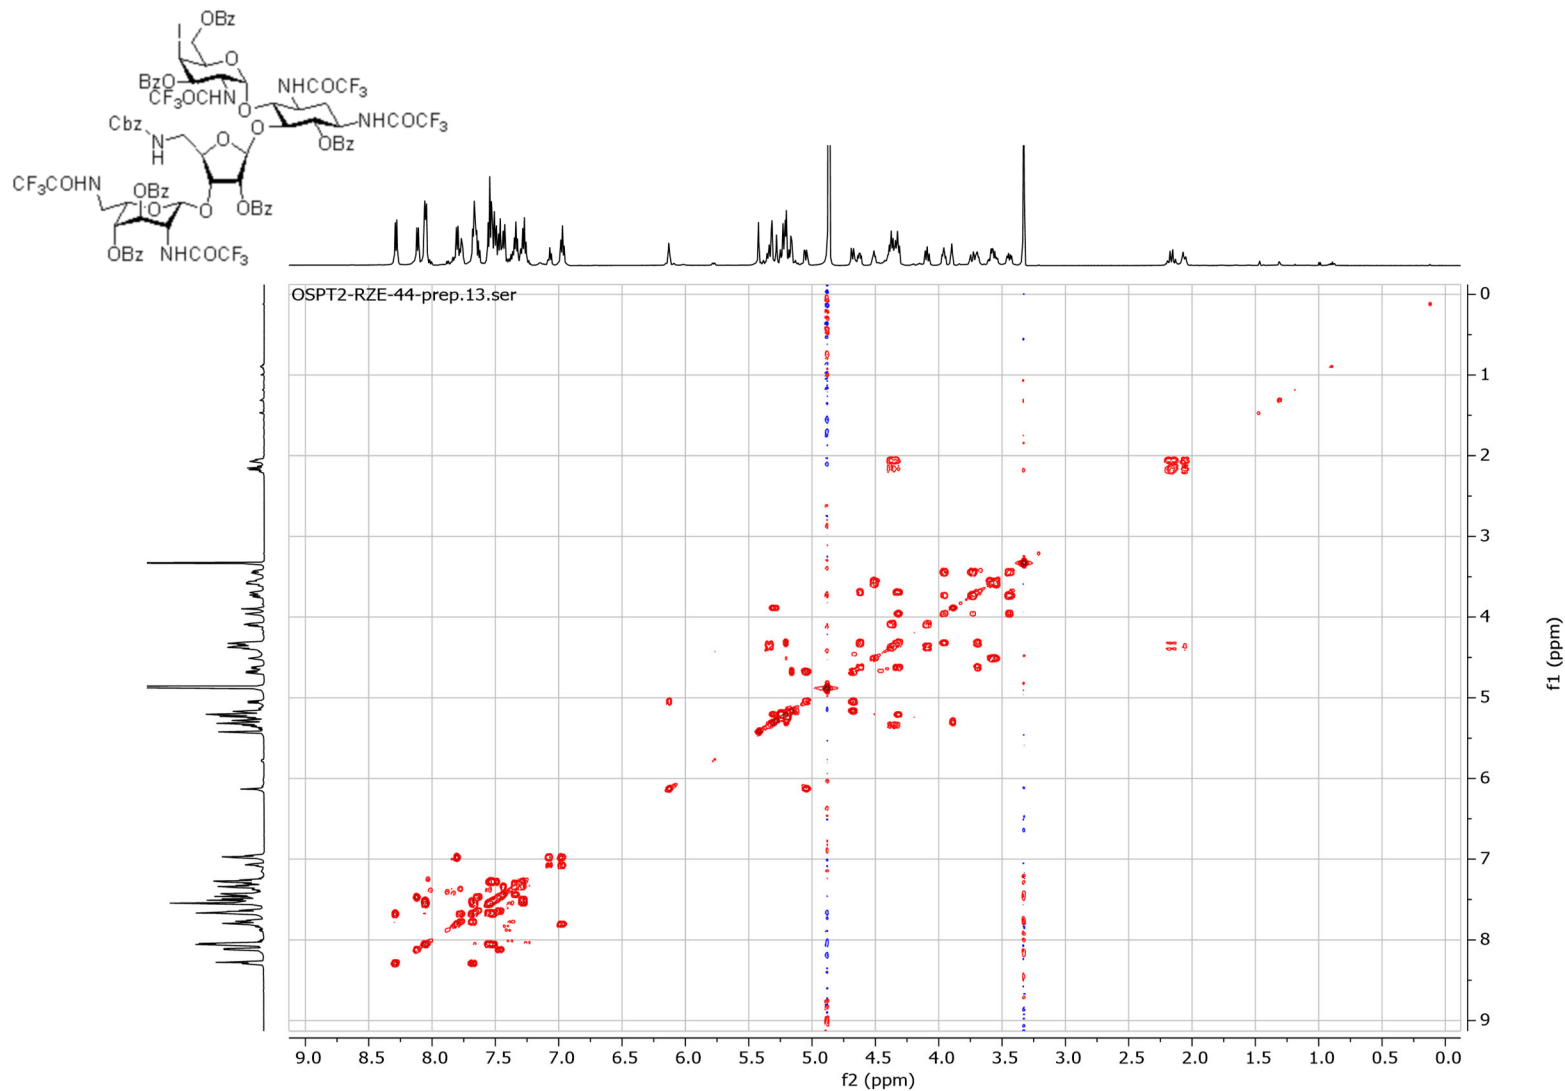

**4',5''-Dideoxy-5''-(*O*-benzylcarbamoyl)-6,3',6',2'',3''',4'''-hexa-*O*-benzoyl-4'-iodo-1,3,2''',6'''-penta-*N*-trifluoroacetyl 4'-*epi*-paromomycin (25)**

[<sup>1</sup>H, <sup>1</sup>H DQF-COSY, 600 MHz, CD<sub>3</sub>OD]

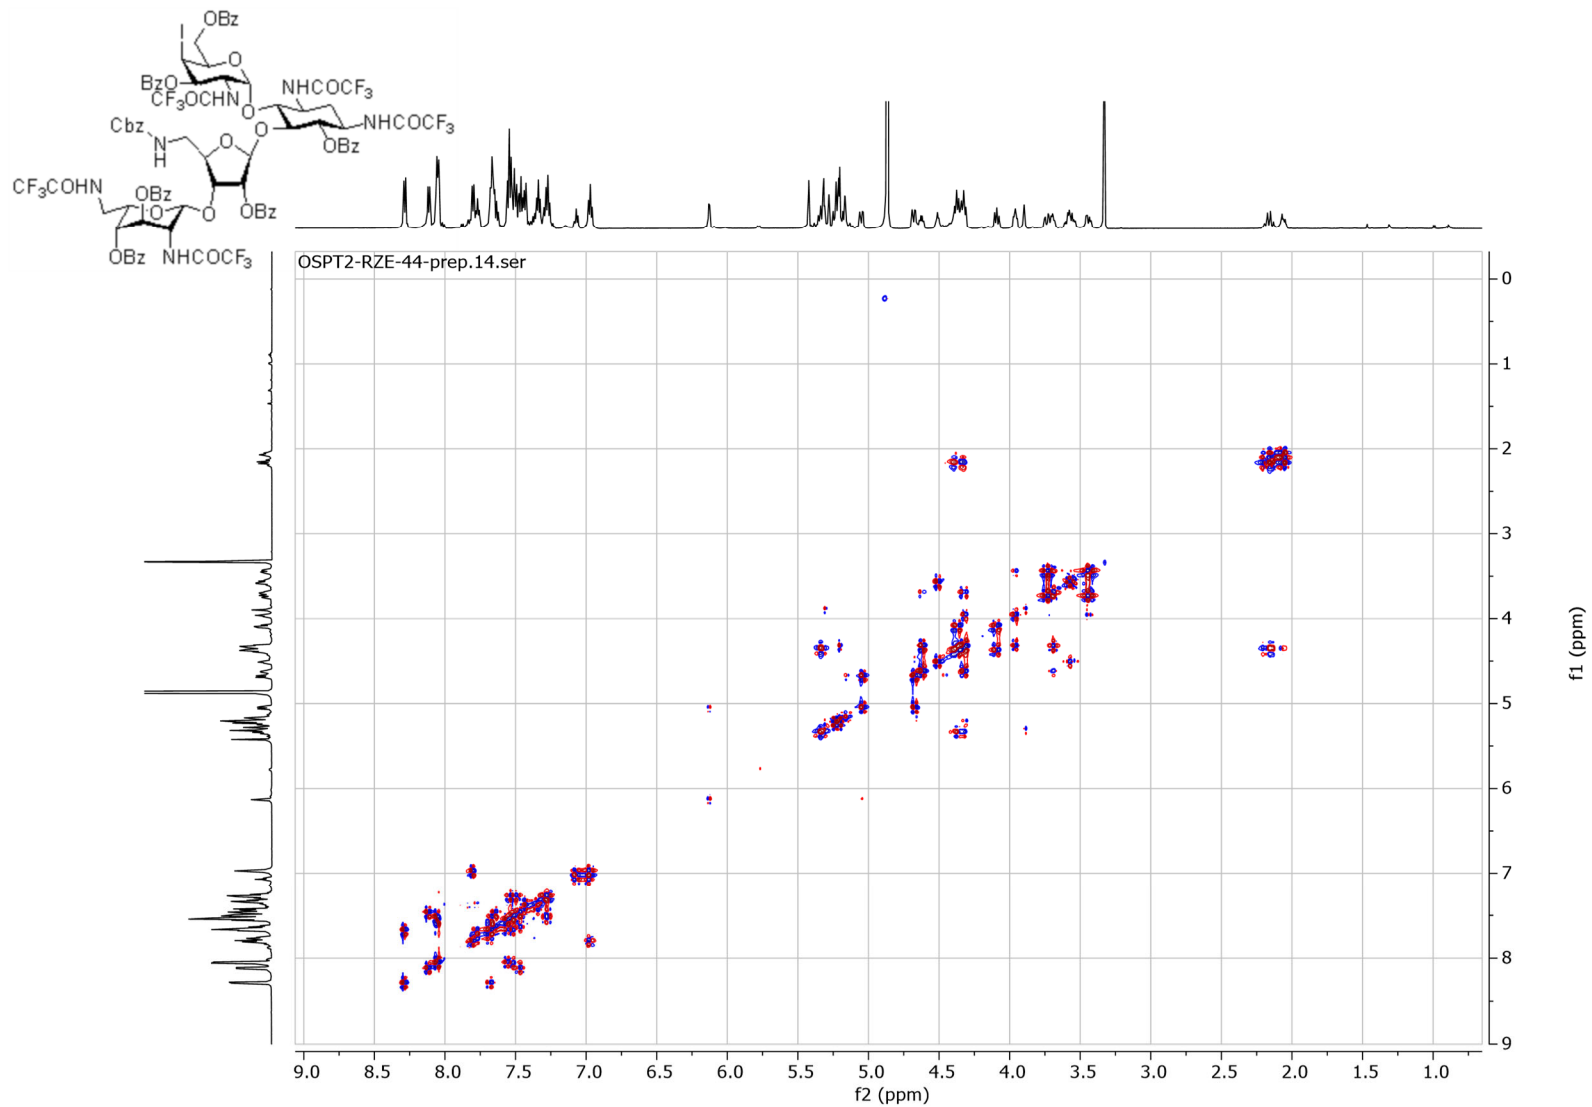



4'-Allyl-4',5''-dideoxy-5''-(*O*-benzylcarbamoyl)-6,3',6',2'',3''',4''''-hexa-*O*-benzoyl-1,3,2',2''',6''''-penta-*N*-trifluoroacetyl paromomycin (26)

[<sup>1</sup>H-NMR, 400 MHz, CD<sub>3</sub>OD]

OSPT2-DIMI-1134.10.fid

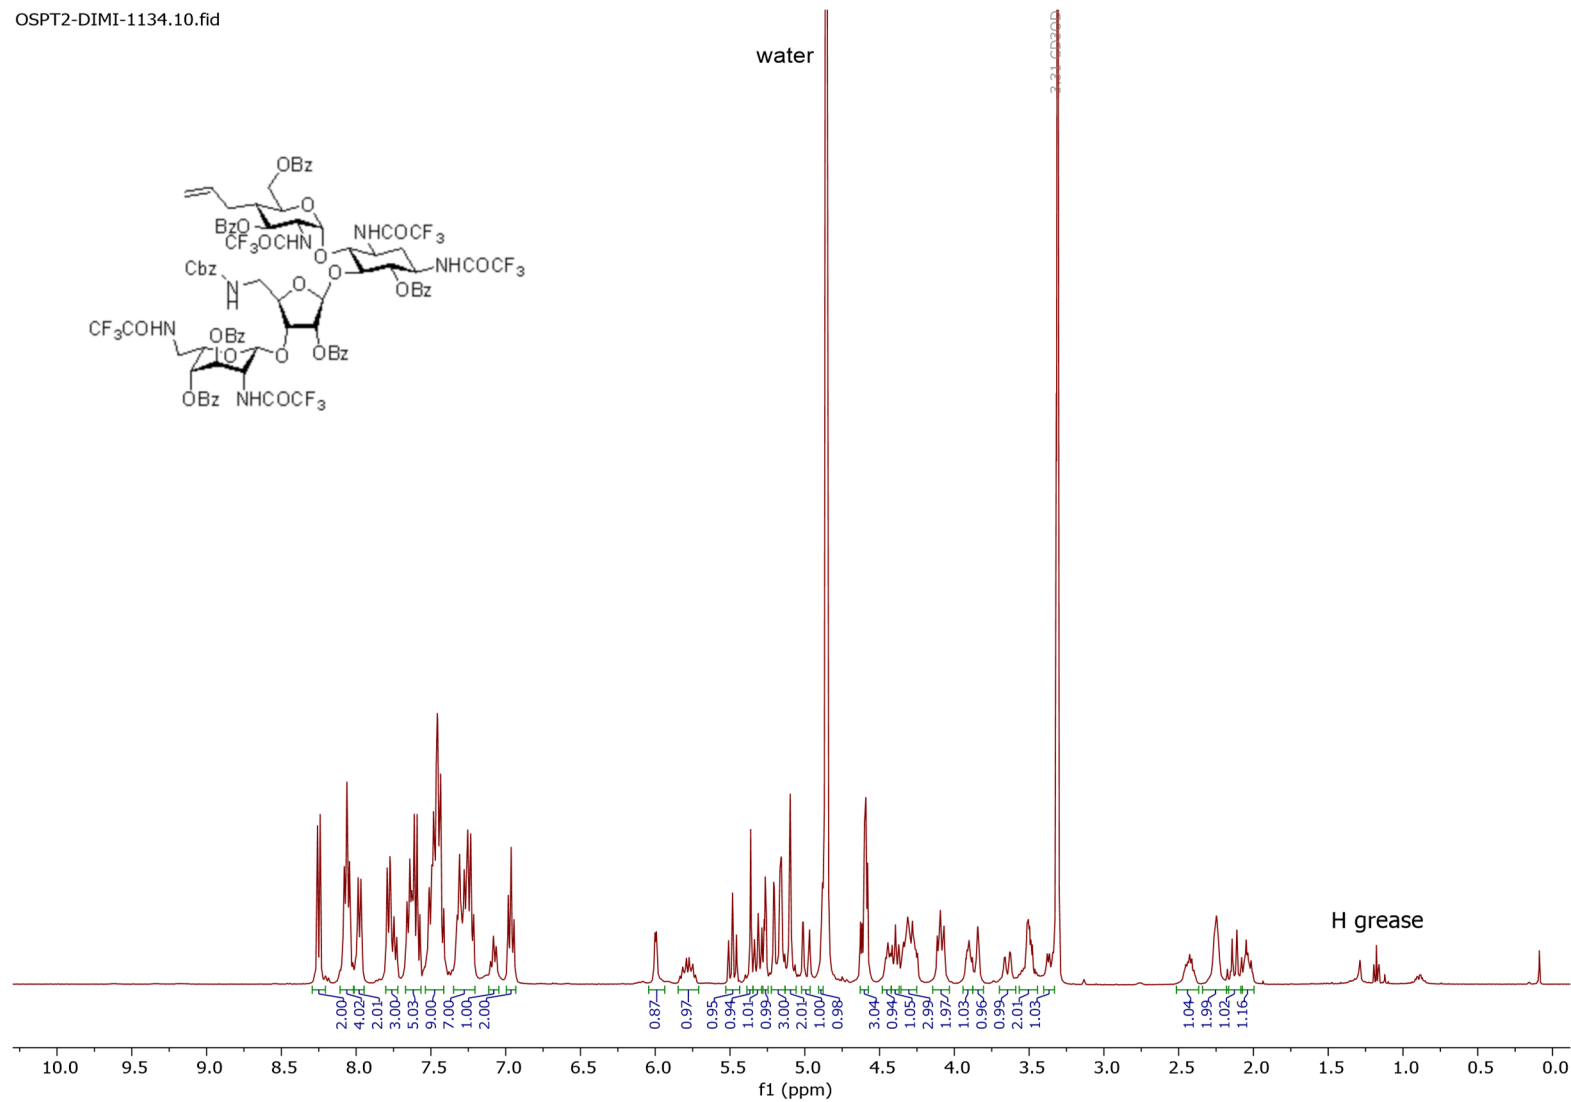

**4'-Allyl-4',5''-dideoxy-5''-(O-benzylcarbamoyl)-6,3',6',2'',3''',4''''-hexa-O-benzoyl-1,3,2',2''',6''''-penta-N-trifluoroacetyl paromomycin (26)**

[<sup>13</sup>C-NMR, 100.6 MHz, CD<sub>3</sub>OD]

OSPT2-DIMI-1134.11.fid

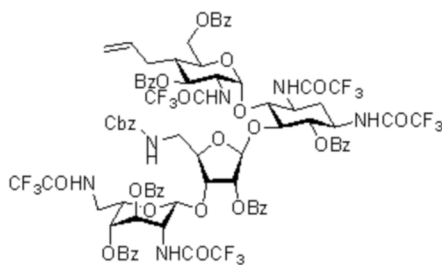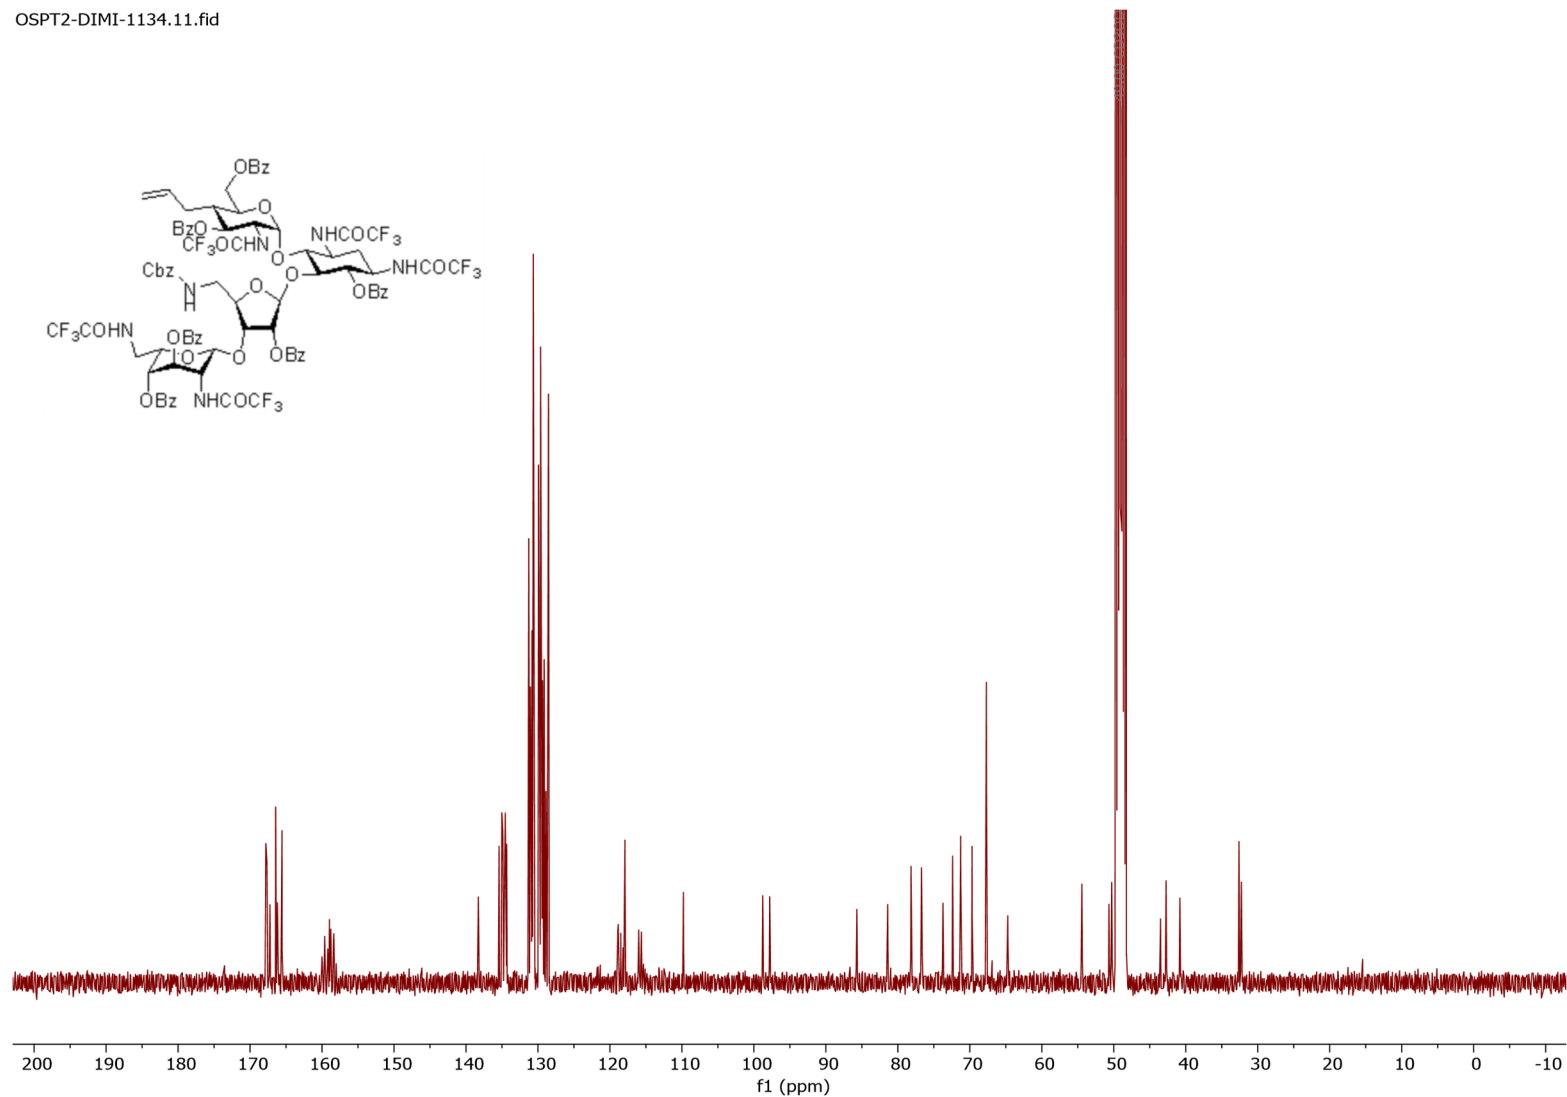

**4'-Allyl-4',5''-dideoxy-5''-(*O*-benzylcarbamoyl)-6,3',6',2'',3''',4''''-hexa-*O*-benzoyl-1,3,2',2''',6''''-penta-*N*-trifluoroacetyl paromomycin (26)**

[<sup>1</sup>H, <sup>13</sup>C HSQC, 400 MHz, 100.6 MHz, CD<sub>3</sub>OD]

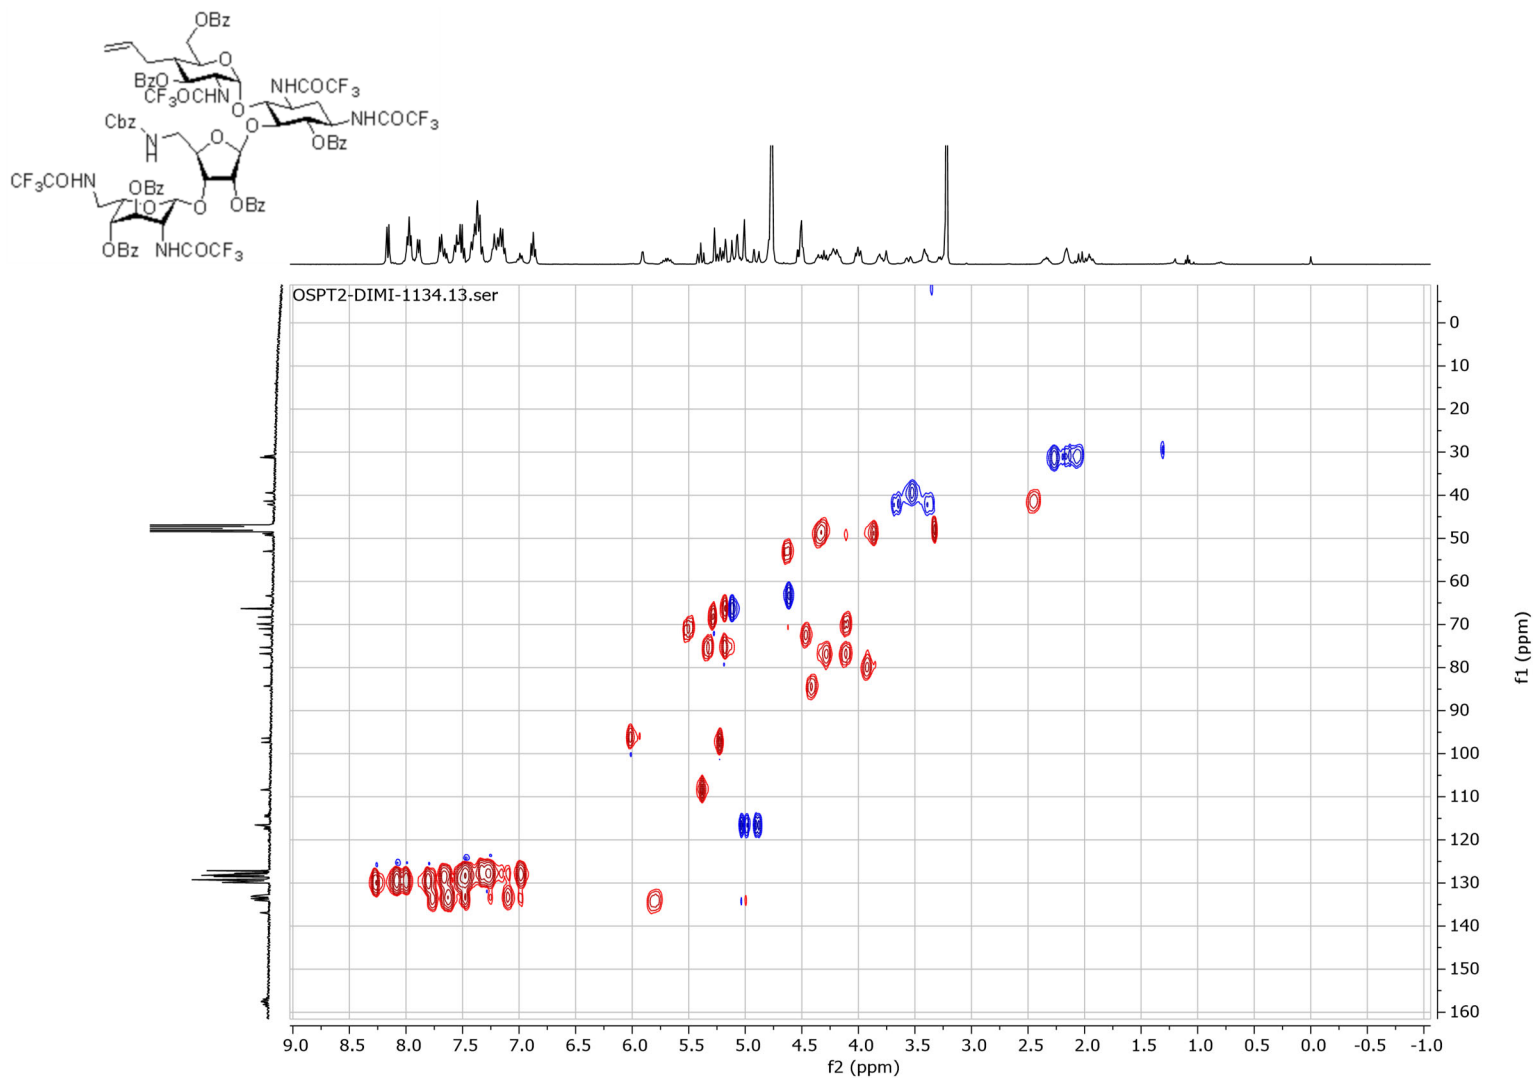

**4'-Allyl-4',5''-dideoxy-5''-(O-benzylcarbamoyl)-6,3',6',2'',3''',4''''-hexa-O-benzoyl-1,3,2',2''',6''''-penta-N-trifluoroacetyl paromomycin (26)**

[<sup>1</sup>H, <sup>13</sup>C HMBC, 400 MHz, 100.6 MHz, CD<sub>3</sub>OD]

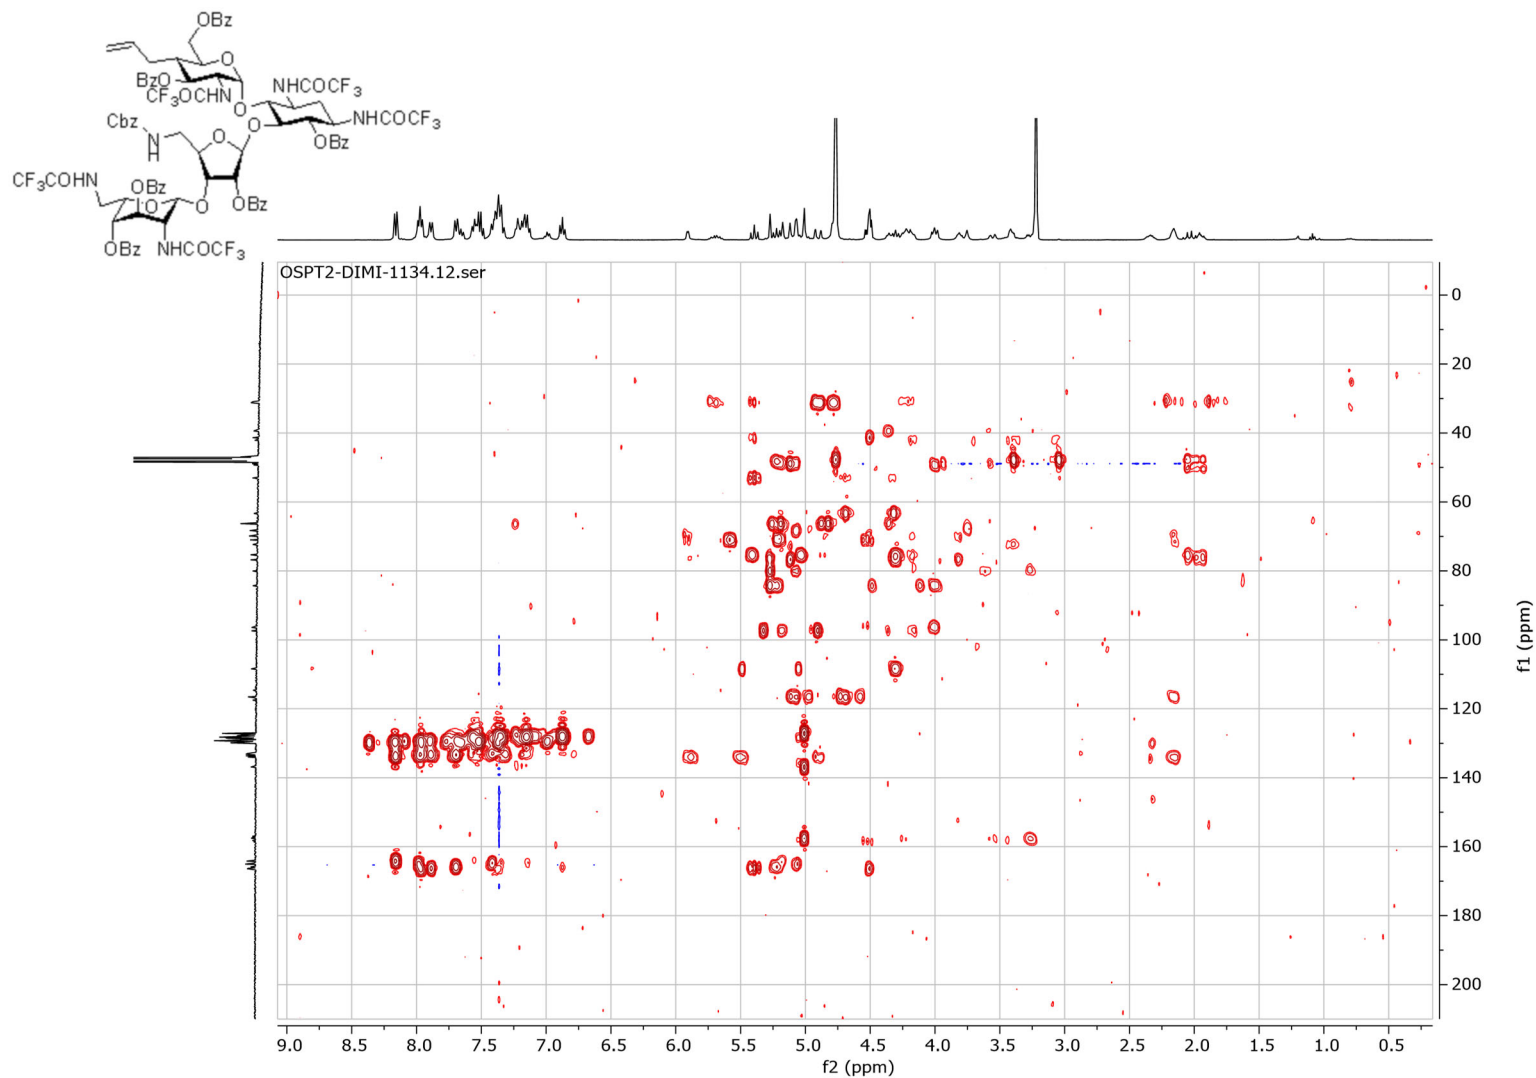



**4'-Allyl-4',5''-dideoxy-5''-(O-benzylcarbamoyl)-6,3',6',2'',3''',4''''-hexa-O-benzoyl-1,3,2',2''',6''''-penta-N-trifluoroacetyl paromomycin (26)**

Latvijas Organiskās sintēzes institūts  
Fizikāli organiskās ķīmijas laboratorija

**MS: Waters Synapt G2-Si** Capillary, kV: 0.7 **LC: Acquity UPLC H-Class** Column: Acquity UPLC BEH C18  
**ESI+** Cone, V: 40 2.1x50mm, 1.7µm

**Sample:**

HRMS\_2019\_08\_447 1009 Zogota RZE-47

MS\_POS\_500-2000\_RES\_7min ACN\_Form\_5-98\_040\_7min 1:D,5 10.000000 MS\_Tune Col#43

Elemental Composition Report:

Tolerance = 5.0 PPM / DBE: min = -1.5, max = 50.0

Element prediction: Off

Number of isotope peaks used for i-FIT = 3

Monoisotopic Mass, Even Electron Ions

279 formula(e) evaluated with 1 results within limits (all results (up to 1000) for each mass)

Elements Used:

C: 0-86 H: 1-110 N: 1-10 O: 0-25 F: 15-15 Na: 1-1

| Mass      | RA     | Calc. Mass | mDa  | PPM  | DBE  | i-FIT | Norm | Conf(%) | Formula               |
|-----------|--------|------------|------|------|------|-------|------|---------|-----------------------|
| 1899.4436 | 100.00 | 1899.4440  | -0.4 | -0.2 | 44.5 | 484.0 | n/a  | n/a     | C86 H75 N6 O25 F15 Na |

**1009 Zogota RZE-47**

HRMS\_2019\_08\_447 1628 (4.552) Cm (1628:1650-(1581:1600+1695:1713))

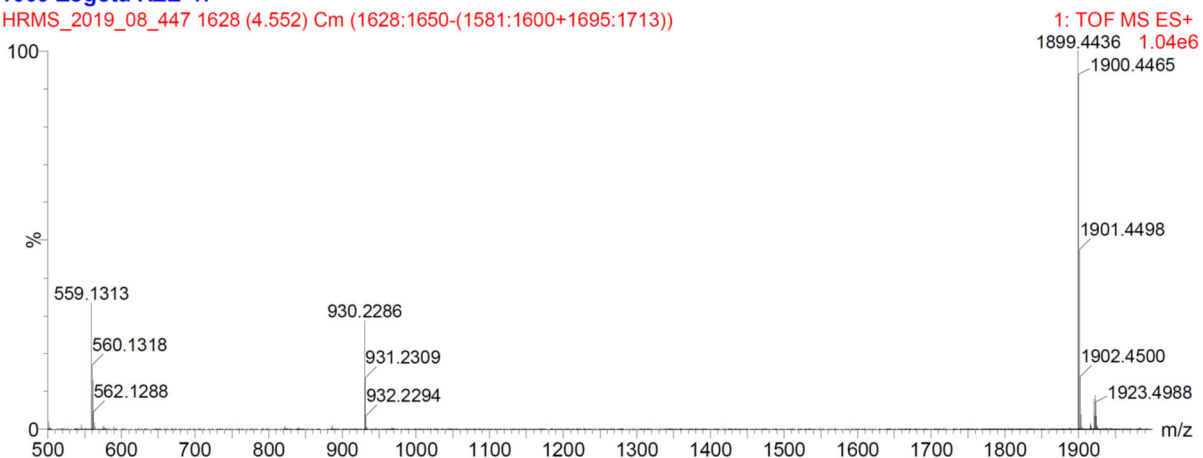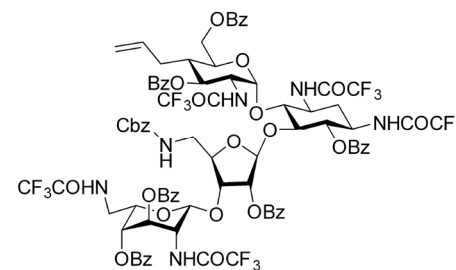

**4',5''-Dideoxy-5''-(O-benzylcarbamoyl)-6,3',6',2'',3''',4''''-hexa-O-benzoyl-1,3,2',2''',6''''-penta-N-trifluoroacetyl paromomycin-4'-ene (27)**

[<sup>1</sup>H-NMR, 400 MHz, CD<sub>3</sub>OD]

OSPT2-RZE-115.10.fid

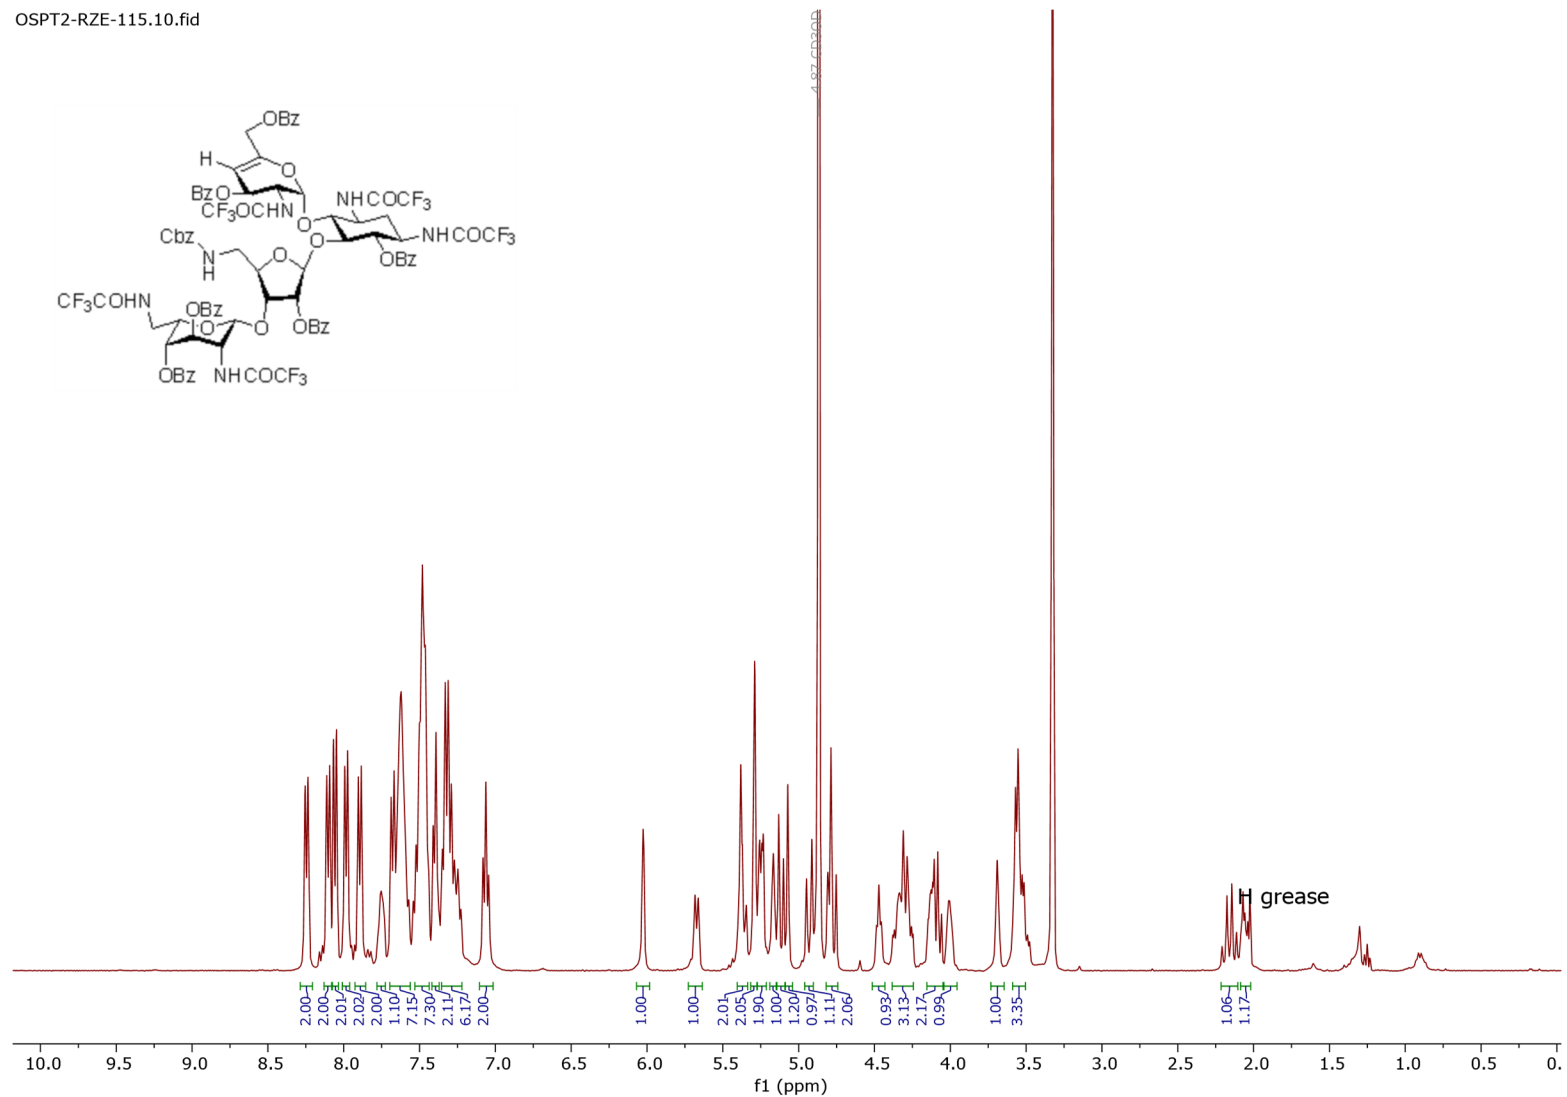

**4',5''-Dideoxy-5''-(O-benzylcarbamoyl)-6,3',6',2'',3''',4'''-hexa-O-benzoyl-1,3,2',2''',6'''-penta-N-trifluoroacetyl paromomycin-4'-ene (27)**

[<sup>13</sup>C-NMR, 100.6 MHz, CD<sub>3</sub>OD]

OSPT2-RZE-115.22.fid

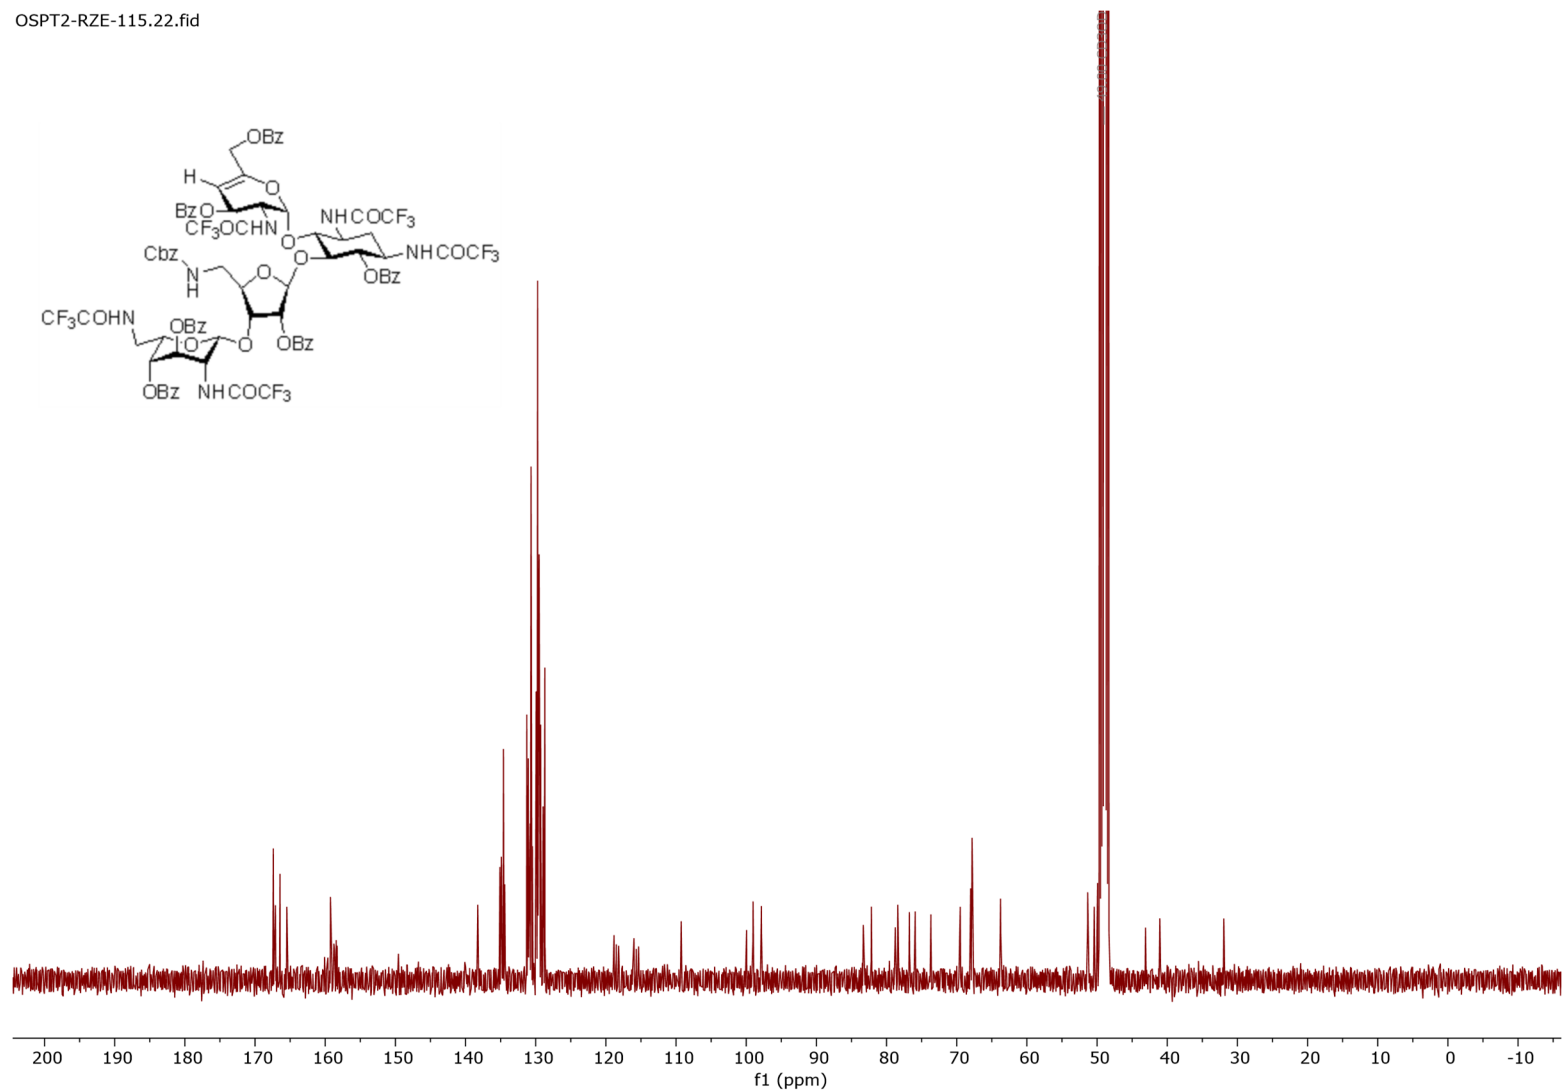

**4',5''-Dideoxy-5''-(O-benzylcarbamoyl)-6,3',6',2'',3''',4''-hexa-O-benzoyl-1,3,2',2''',6''-penta-N-trifluoroacetyl paromomycin-4'-ene (27)**

[<sup>1</sup>H, <sup>13</sup>C HSQC, 400 MHz, 100.6 MHz, CD<sub>3</sub>OD]

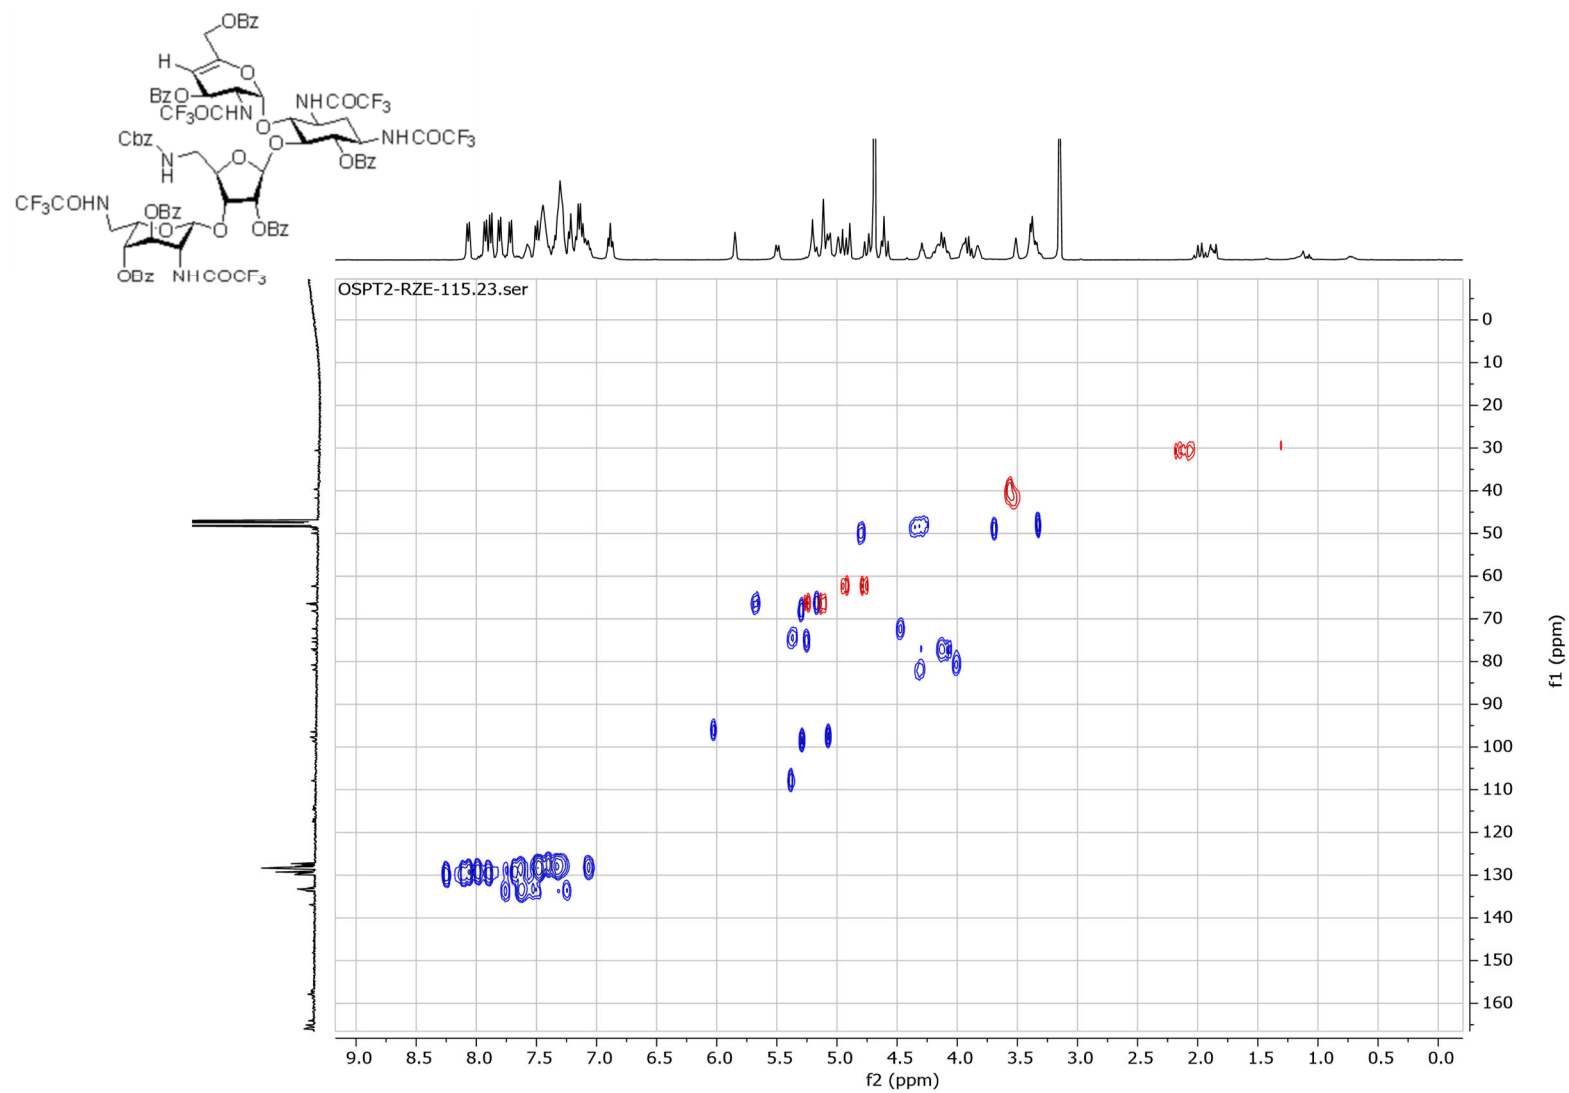

**4',5''-Dideoxy-5''-(O-benzylcarbamoyl)-6,3',6',2'',3''',4''''-hexa-O-benzoyl-1,3,2',2''',6''''-penta-N-trifluoroacetyl paromomycin-4'-ene (27)**

[<sup>1</sup>H, <sup>1</sup>H COSY, 400 MHz, CD<sub>3</sub>OD]

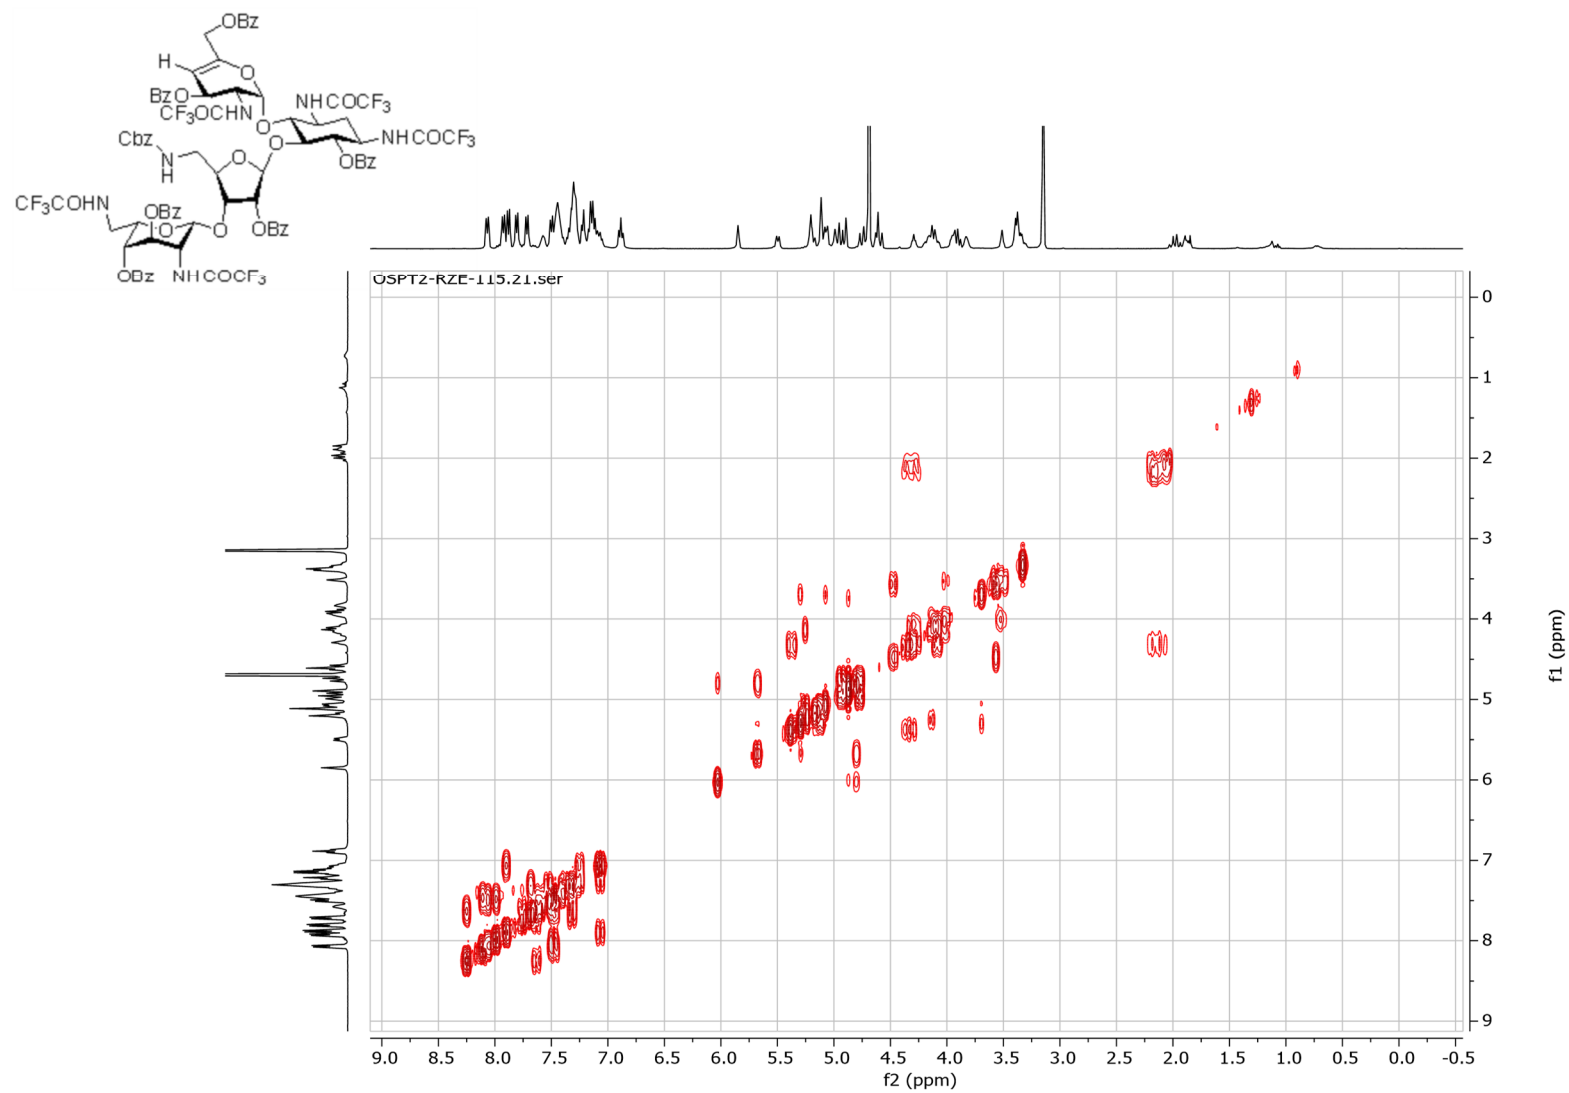

**4',5''-Dideoxy-5''-(O-benzylcarbamoyl)-6,3',6',2'',3''',4''''-hexa-O-benzoyl-1,3,2',2''',6''''-penta-N-trifluoroacetyl paromomycin-4'-ene (27)**

Latvijas Organiskās sintēzes institūts  
Fizikāli organiskās ķīmijas laboratorija

**MS: Waters Synapt G2-Si** Capillary, kV: 0.7      **LC: Acquity UPLC H-Class** Column: Acquity UPLC BEH C18  
**ESI+** Cone, V: 40      2.1x50mm, 1.7µm

**Sample:**

HRMS\_2020\_05\_212 2374 Zogota RZE-115

MS\_POS\_2300\_RES\_7min ACN\_Form\_5-98\_040\_7min 1:D,8 5.000000 MS\_Tune Col#66

**Elemental Composition Report:**

Single Mass Analysis

Tolerance = 5.0 PPM / DBE: min = -1.5, max = 50.0

Element prediction: Off

Number of isotope peaks used for i-FIT = 5

Monoisotopic Mass, Even Electron Ions

1127 formula(e) evaluated with 4 results within limits (up to 5 closest results for each mass)

Elements Used:

C: 0-100 H: 0-100 N: 0-10 O: 0-25 F: 15-15 Na: 1-1

| Mass      | Calc. Mass | mDa  | PPM  | DBE  | i-FIT | Norm  | Conf(%) | Formula                |
|-----------|------------|------|------|------|-------|-------|---------|------------------------|
| 1857.4004 | 1857.4011  | -0.7 | -0.4 | 48.5 | 947.8 | 2.200 | 11.08   | C88 H69 N4 O23 F15 Na  |
|           | 1857.3984  | 2.0  | 1.1  | 49.5 | 946.6 | 1.000 | 36.80   | C84 H65 N10 O21 F15 Na |
|           | 1857.3971  | 3.3  | 1.8  | 44.5 | 946.9 | 1.290 | 27.52   | C83 H69 N6 O25 F15 Na  |
|           | 1857.4083  | -7.9 | -4.3 | 44.5 | 947.0 | 1.403 | 24.59   | C82 H69 N8 O24 F15 Na  |

**2374 Zogota RZE-115**

HRMS\_2020\_05\_212 1638 (4.580) Cm (1634:1652-(1681:1694+1603:1616))

1: TOF MS ES+  
1.73e6

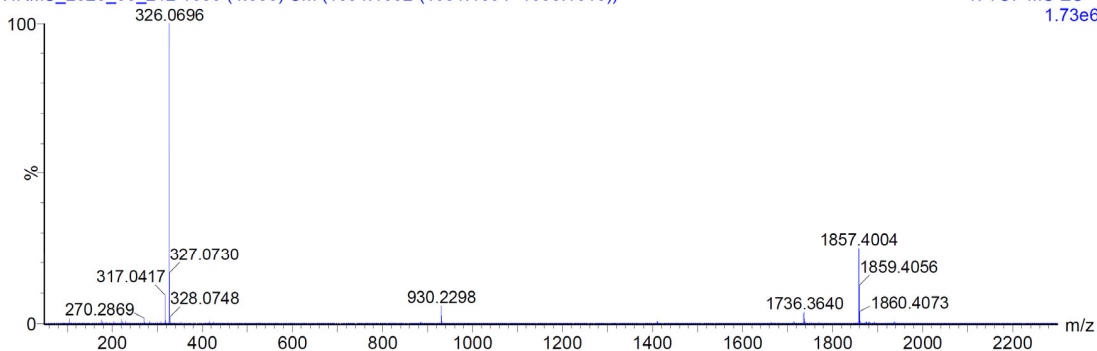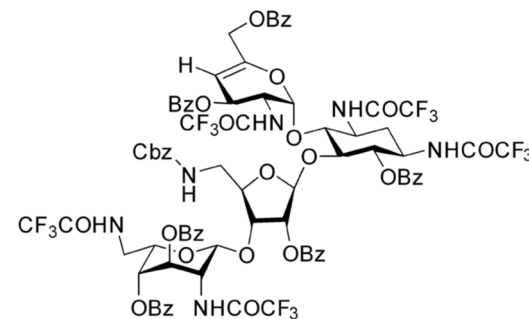

5''-Deoxy-5''-(*O*-benzylcarbamoyl)-6,3',6',2'',3''',4'''-hexa-*O*-benzoyl-1,3,2',2''',6'''-penta-*N*-trifluoroacetyl 4'-*epi*-paromomycin (28)

[<sup>1</sup>H-NMR, 600 MHz, CD<sub>3</sub>OD]

OSPT2-RZE-107.1.fid

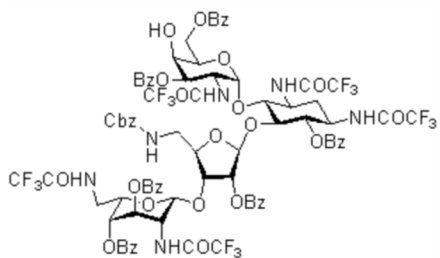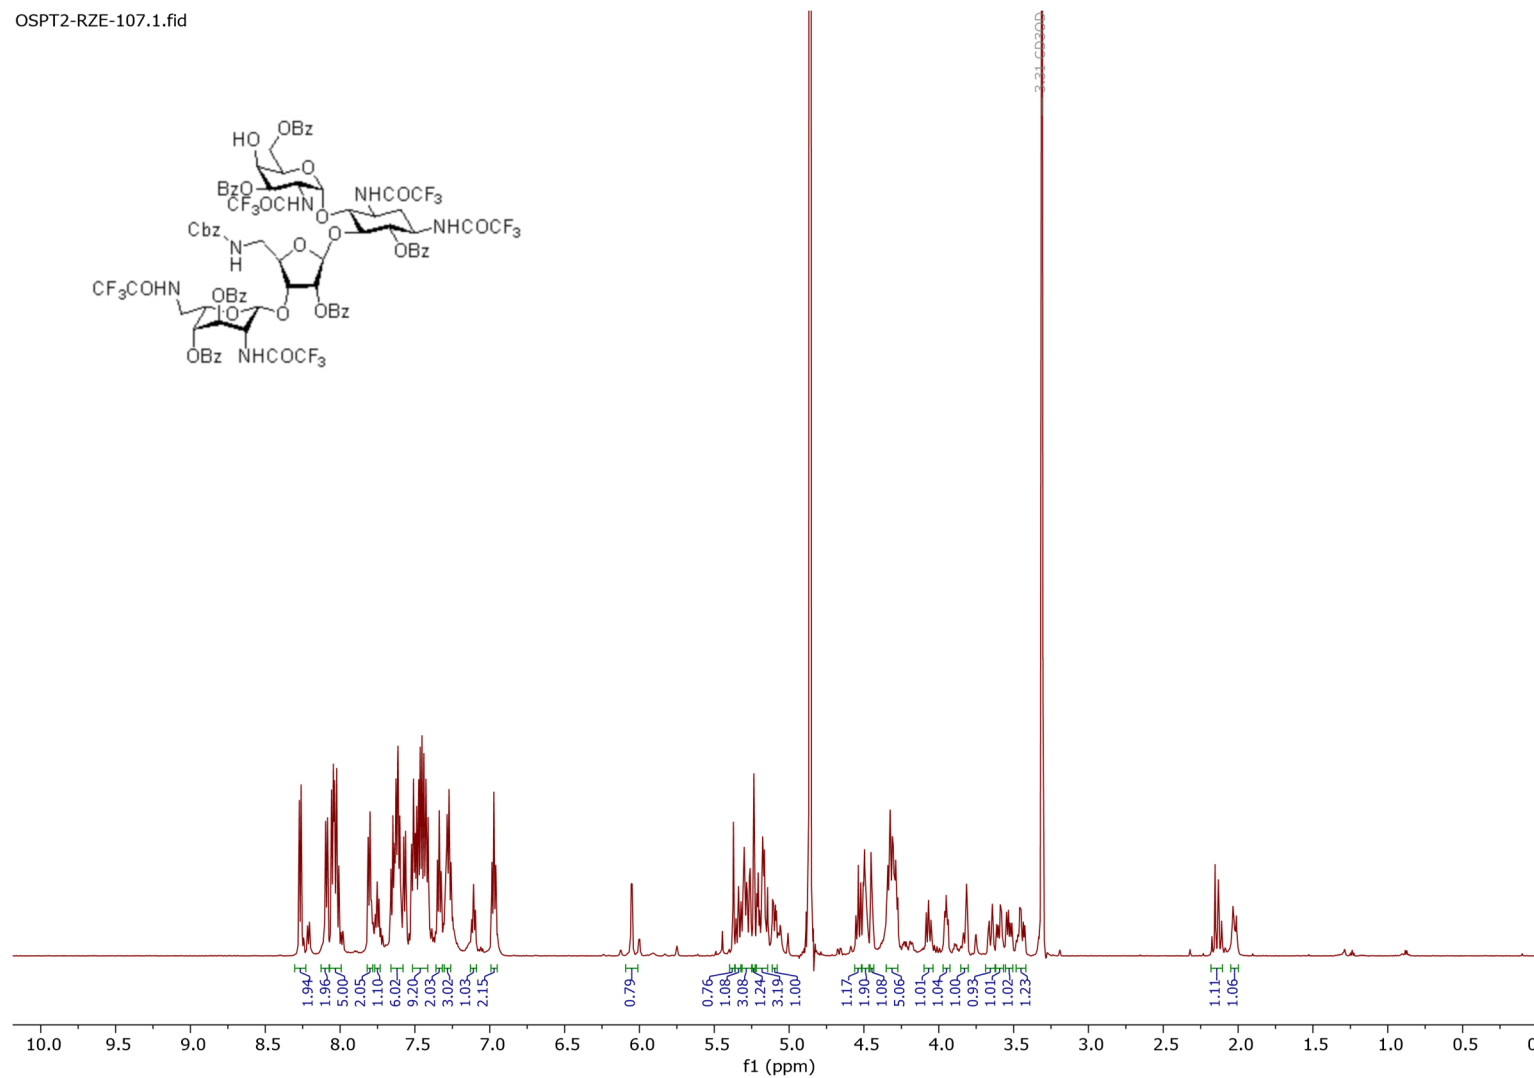

**5''-Deoxy-5''-(*O*-benzylcarbamoyl)-6,3',6',2'',3''',4'''-hexa-*O*-benzoyl-1,3,2',2''',6'''-penta-*N*-trifluoroacetyl 4'-*epi*-paromomycin (28)**

[<sup>13</sup>C-NMR, 150.9 MHz, CD<sub>3</sub>OD]

OSPT2-RZE-107.4.fid

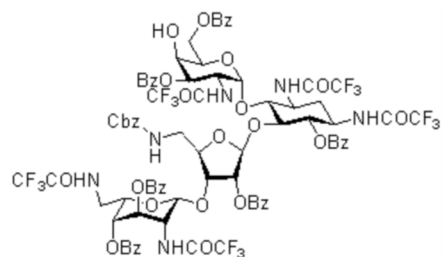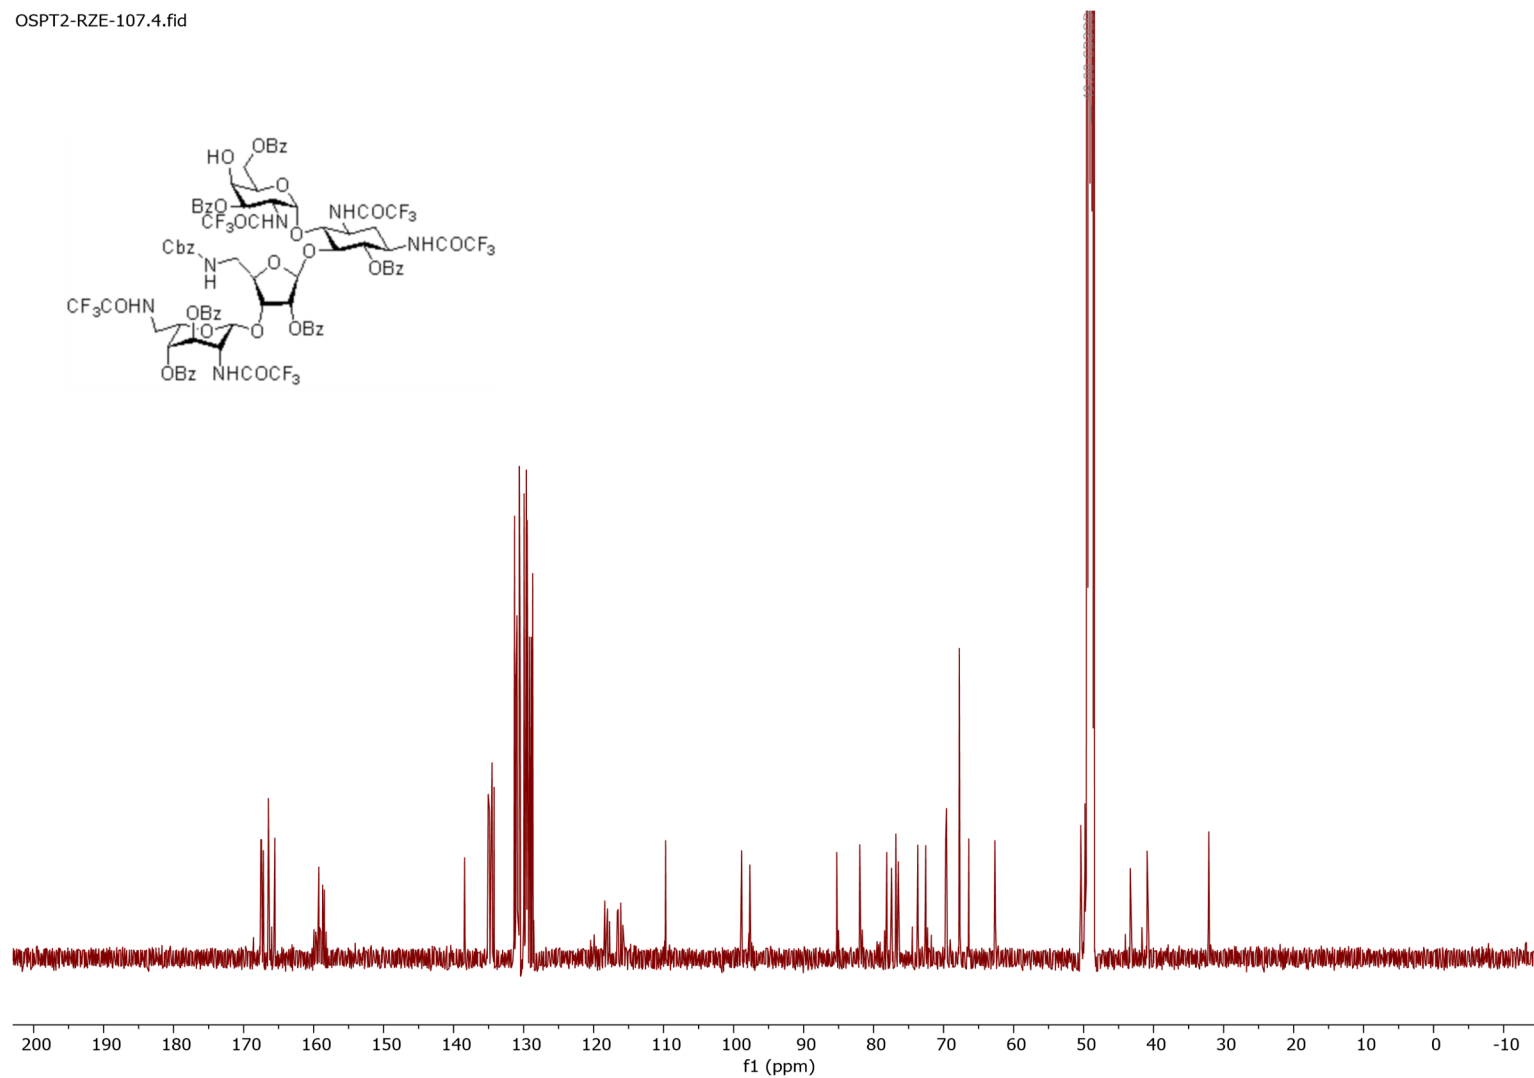



5''-Deoxy-5''-(*O*-benzylcarbamoyl)-6,3',6',2'',3''',4'''-hexa-*O*-benzoyl-1,3,2',2''',6'''-penta-*N*-trifluoroacetyl 4'-*epi*-paromomycin (28)

[<sup>1</sup>H, <sup>13</sup>C HSQC, 600 MHz, 150.9 MHz, CD<sub>3</sub>OD]

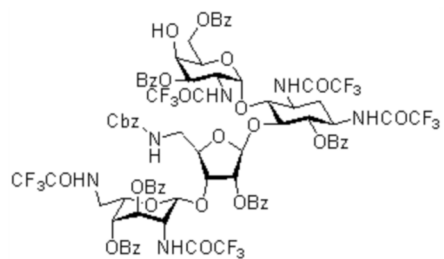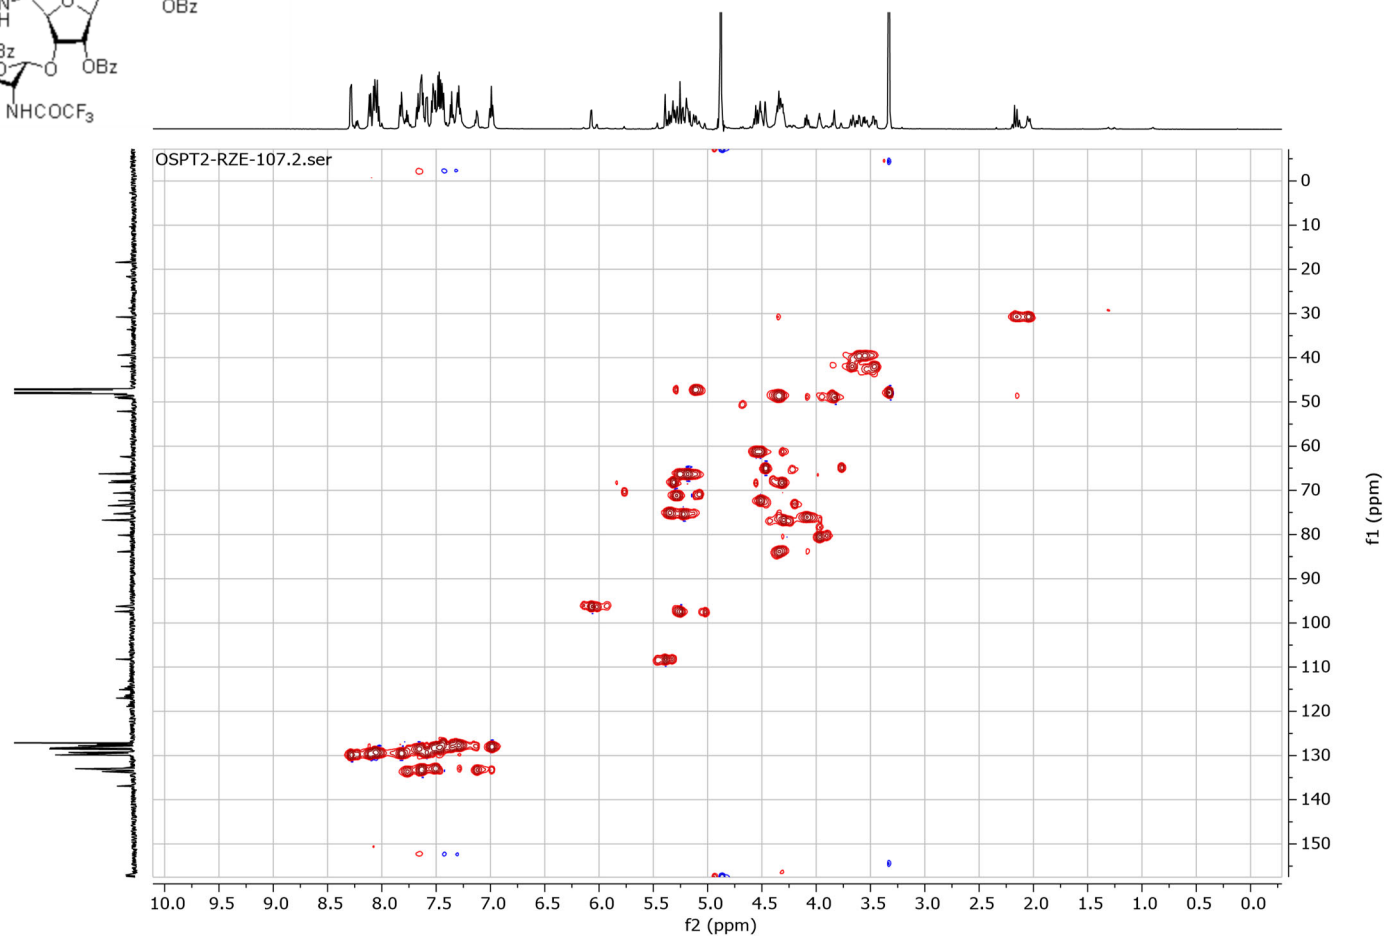

5''-Deoxy-5''-(*O*-benzylcarbamoyl)-6,3',6',2'',3''',4'''-hexa-*O*-benzoyl-1,3,2',2''',6'''-penta-*N*-trifluoroacetyl 4'-*epi*-paromomycin (28)

[<sup>1</sup>H, <sup>13</sup>C HMBC, 600 MHz, 150.9 MHz, CD<sub>3</sub>OD]

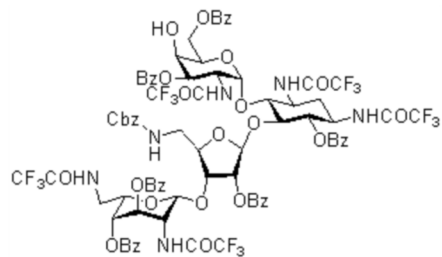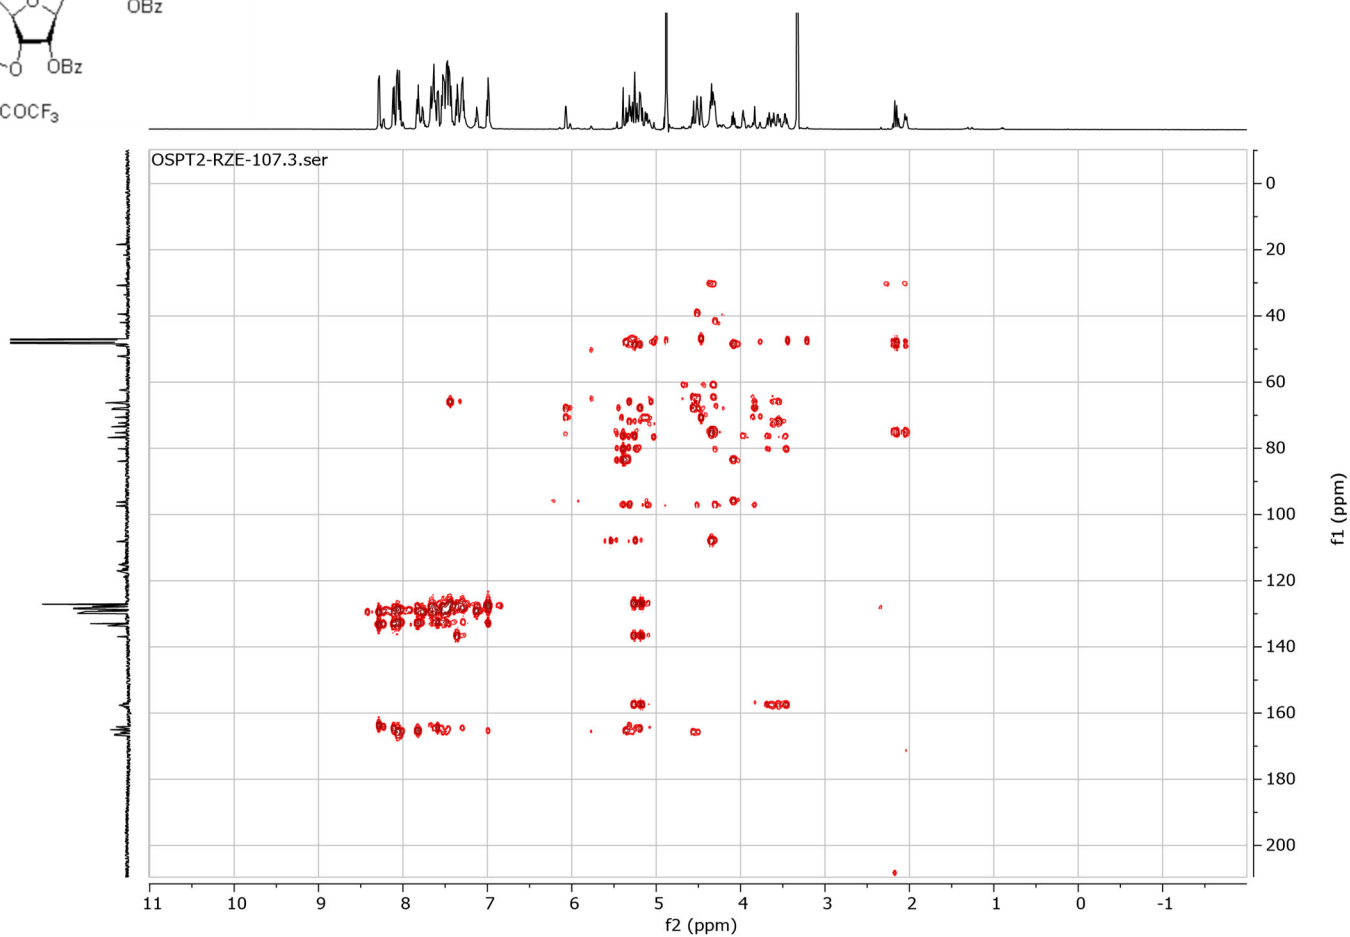

5''-Deoxy-5''-(*O*-benzylcarbamoyl)-6,3',6',2'',3''',4''-hexa-*O*-benzoyl-1,3,2',2''',6''-penta-*N*-trifluoroacetyl 4'-*epi*-paromomycin (28)

[<sup>1</sup>H, <sup>1</sup>H ROESY, 600 MHz, CD<sub>3</sub>OD]

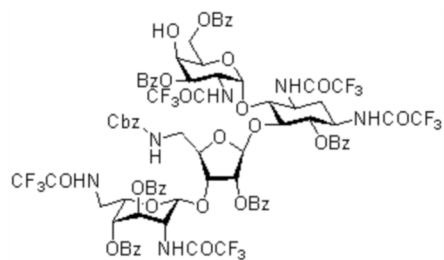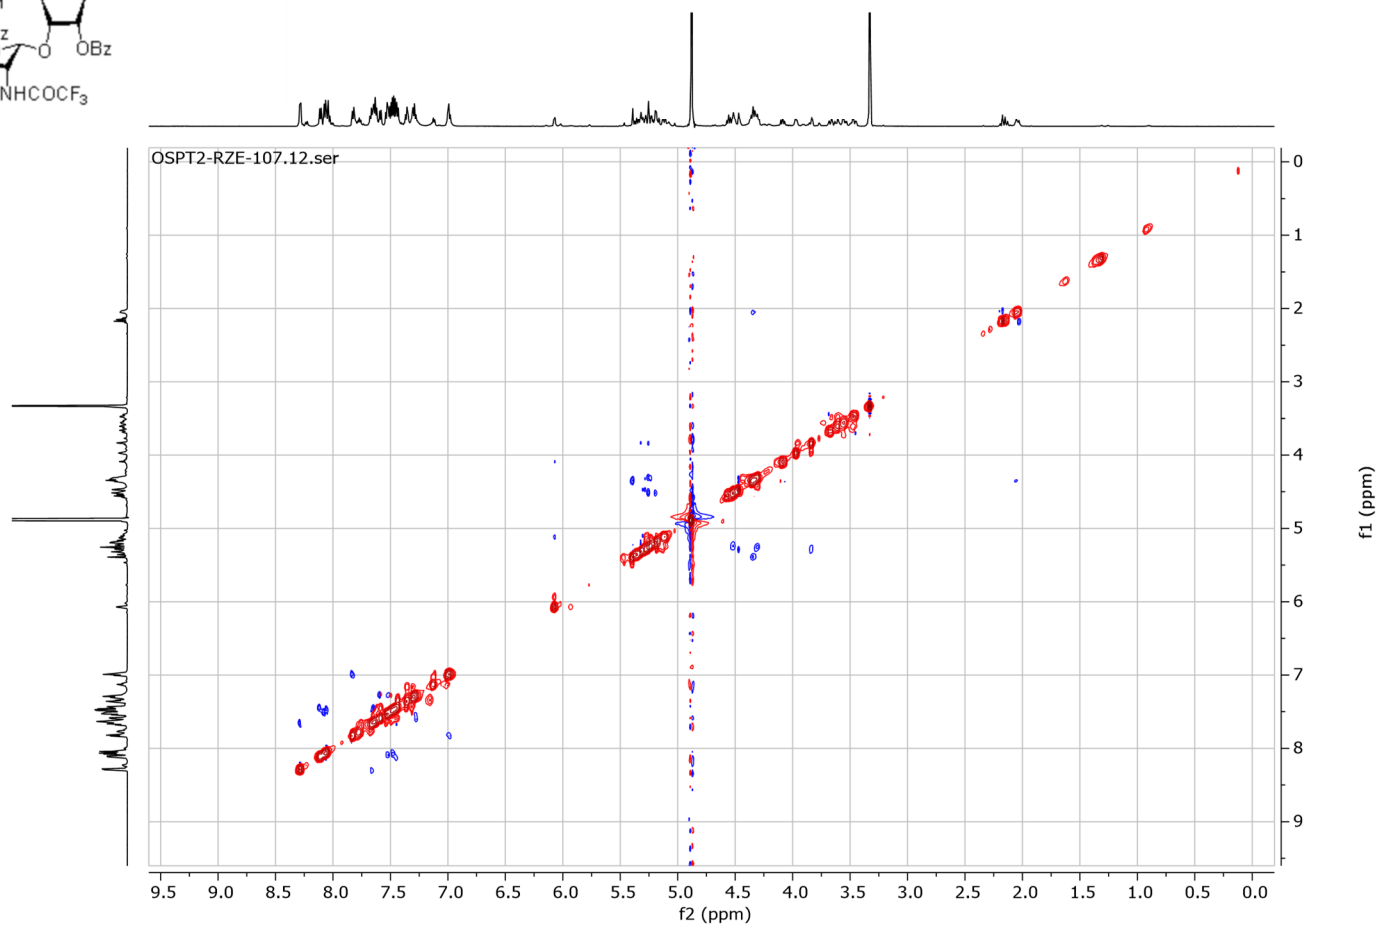

5''-Deoxy-5''-(*O*-benzylcarbamoyl)-6,3',6',2'',3''',4'''-hexa-*O*-benzoyl-1,3,2',2''',6'''-penta-*N*-trifluoroacetyl 4'-*epi*-paromomycin (28)

[<sup>1</sup>H, <sup>1</sup>H COSY, 600 MHz, CD<sub>3</sub>OD]

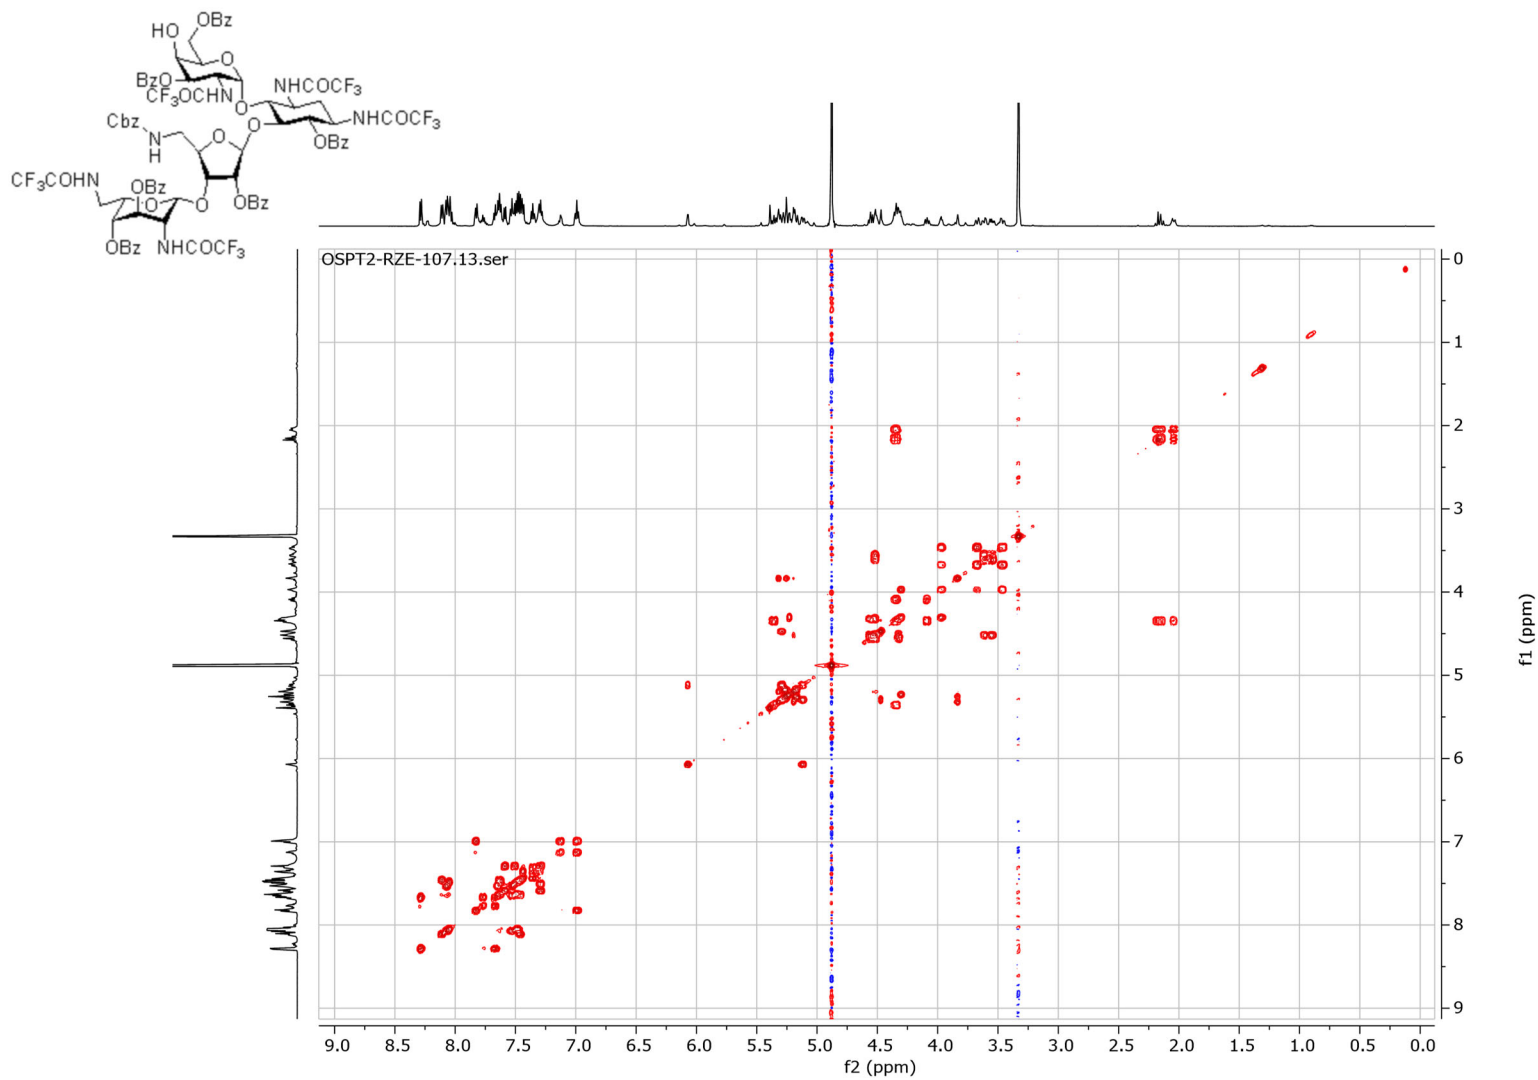

5''-Deoxy-5''-(*O*-benzylcarbamoyl)-6,3',6',2'',3''',4'''-hexa-*O*-benzoyl-1,3,2',2''',6'''-penta-*N*-trifluoroacetyl 4'-*epi*-paromomycin (28)

[<sup>1</sup>H, <sup>1</sup>H DQF-COSY, 600 MHz, CD<sub>3</sub>OD]

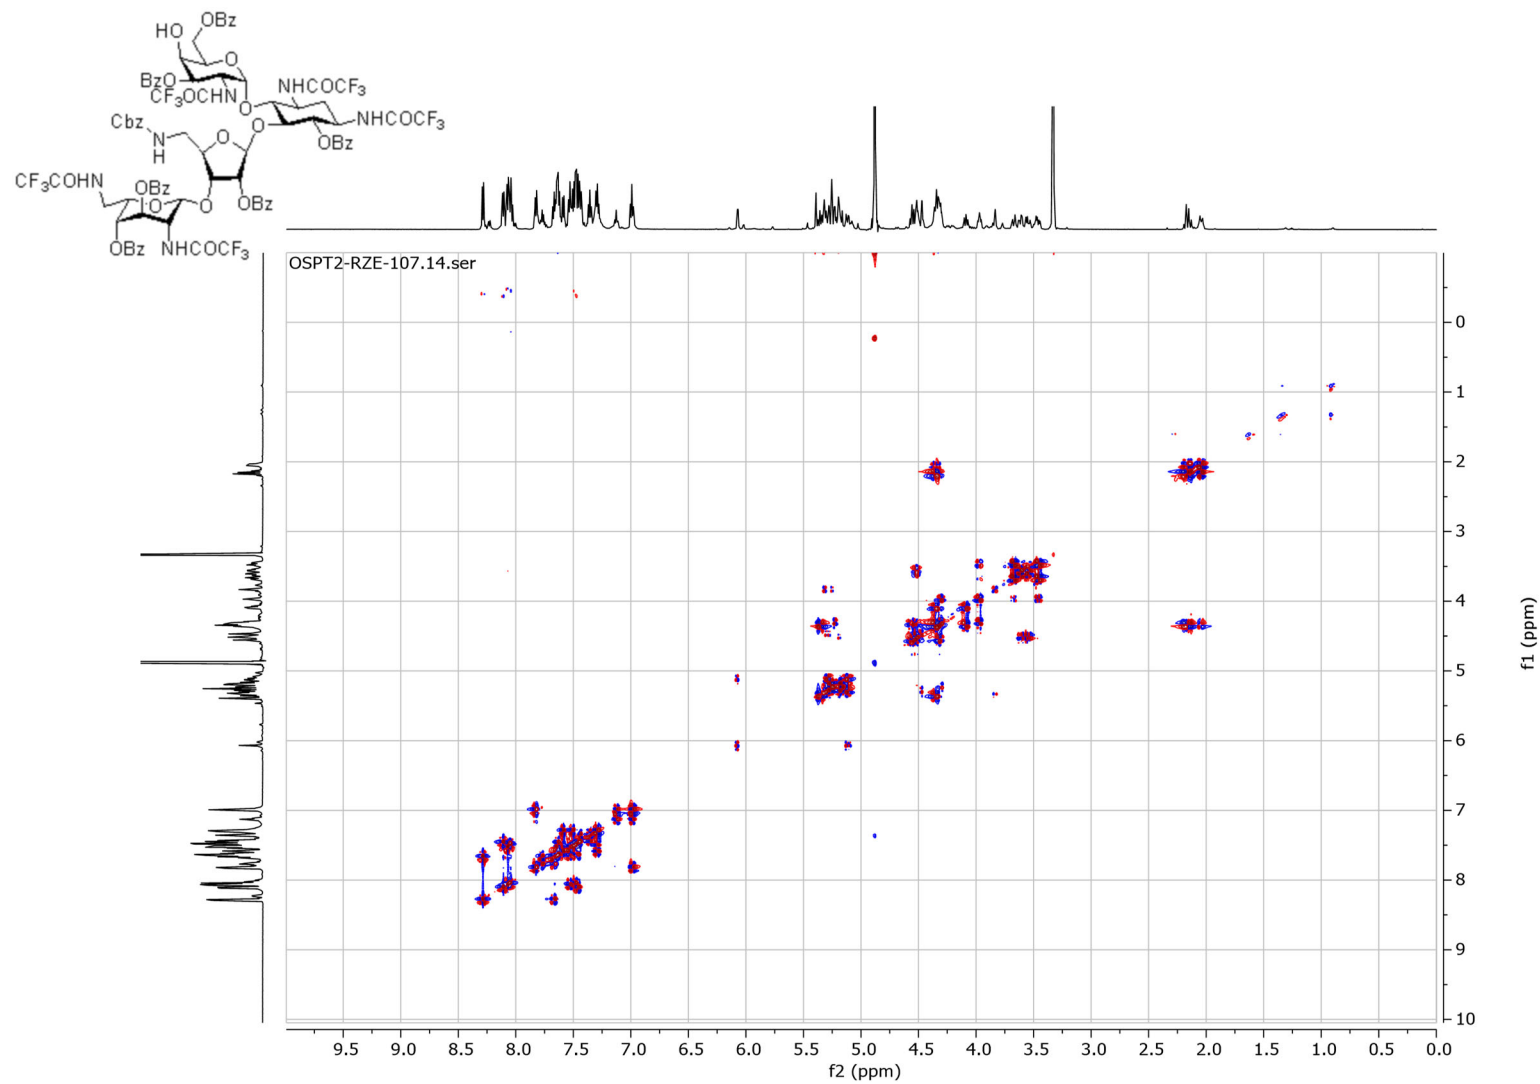

**5''-Deoxy-5''-(*O*-benzylcarbamoyl)-6,3',6',2'',3''',4''-hexa-*O*-benzoyl-1,3,2',2''',6''-penta-*N*-trifluoroacetyl 4'-*epi*-paromomycin (28)**

Latvijas Organiskās sintēzes institūts  
Fizikāli organiskās ķīmijas laboratorija

**MS: Waters Synapt G2-Si** Capillary, kV: 0.7      **LC: Acquity UPLC H-Class** Column: Acquity UPLC BEH C18  
**ESI+** Cone, V: 40      2.1x50mm, 1.7μm

**Sample:**

HRMS\_2020\_04\_322 2182 Zogota RZE-107  
MS\_POS\_500-2300\_RES\_7min ACN\_Form\_5-98\_040\_7min 2:A,1 1.000000 MS\_Tune Col#66

**Elemental Composition Report:**

Single Mass Analysis

Tolerance = 5.0 PPM / DBE: min = -1.5, max = 50.0

Element prediction: Off

Number of isotope peaks used for i-FIT = 5

Monoisotopic Mass, Even Electron Ions

1508 formula(e) evaluated with 10 results within limits (up to 5 closest results for each mass)

Elements Used:

C: 0-100 H: 0-100 N: 0-10 O: 0-30 Na: 1-1 F: 15-15

| Mass      | Calc. Mass | mDa  | PPM  | DBE  | i-FIT | Norm  | Conf(%) | Formula                |
|-----------|------------|------|------|------|-------|-------|---------|------------------------|
| 1875.4097 | 1875.4103  | -0.6 | -0.3 | 42.5 | 771.1 | 2.217 | 10.90   | C87 H75 O28 Na F15     |
|           | 1875.4090  | 0.7  | 0.4  | 48.5 | 770.1 | 1.261 | 28.35   | C84 H67 N10 O22 Na F15 |
|           | 1875.4116  | -1.9 | -1.0 | 47.5 | 771.2 | 2.265 | 10.38   | C88 H71 N4 O24 Na F15  |
|           | 1875.4076  | 2.1  | 1.1  | 43.5 | 770.2 | 1.343 | 26.10   | C83 H71 N6 O26 Na F15  |
|           | 1875.4063  | 3.4  | 1.8  | 38.5 | 770.3 | 1.416 | 24.27   | C82 H75 N2 O30 Na F15  |

**2182 Zogota RZE-107**

HRMS\_2020\_04\_322 1616 (4.520) Cm (1609:1621-(1583:1600+1655:1667))

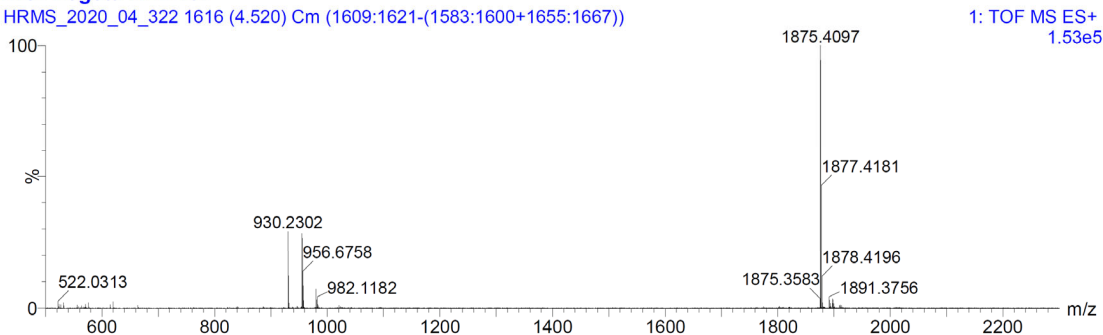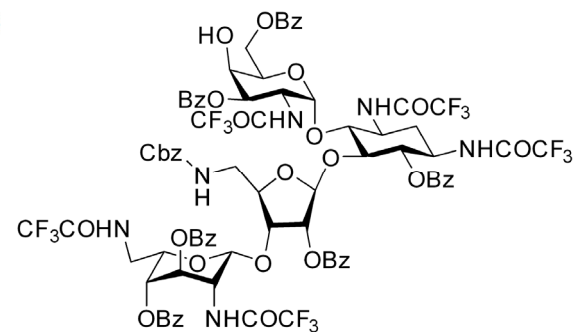

**4',5''-Dideoxy-5''-(*O*-benzylcarbamoyl)-6,3',6',2'',3''',4'''-hexa-*O*-benzoyl-4'-iodo-1,3,2',2''',6'''-penta-*N*-trifluoroacetyl paromomycin (29)**

[<sup>1</sup>H-NMR, 600 MHz, CD<sub>3</sub>OD]

OSPT2-RZE-108.1.fid

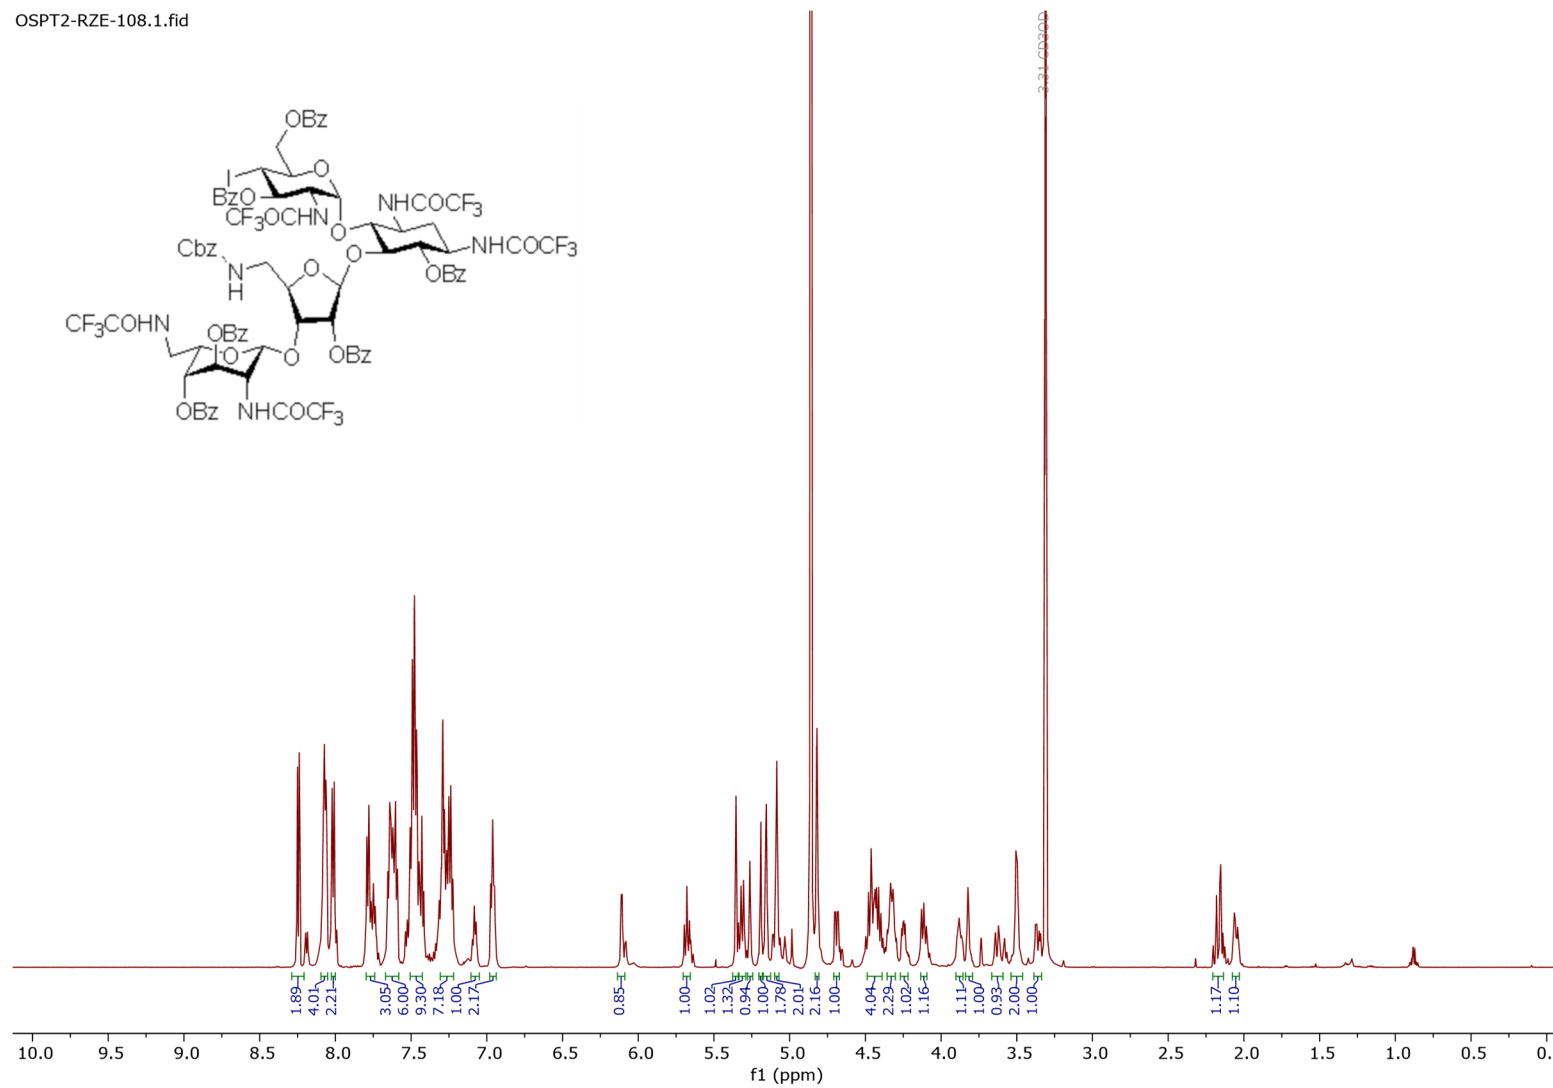

**4',5''-Dideoxy-5''-(*O*-benzylcarbamoyl)-6,3',6',2'',3''',4'''-hexa-*O*-benzoyl-4'-iodo-1,3,2',2''',6'''-penta-*N*-trifluoroacetyl paromomycin (29)**

[<sup>13</sup>C-NMR, 150.9 MHz, CD<sub>3</sub>OD]

OSPT2-RZE-108.4.fid

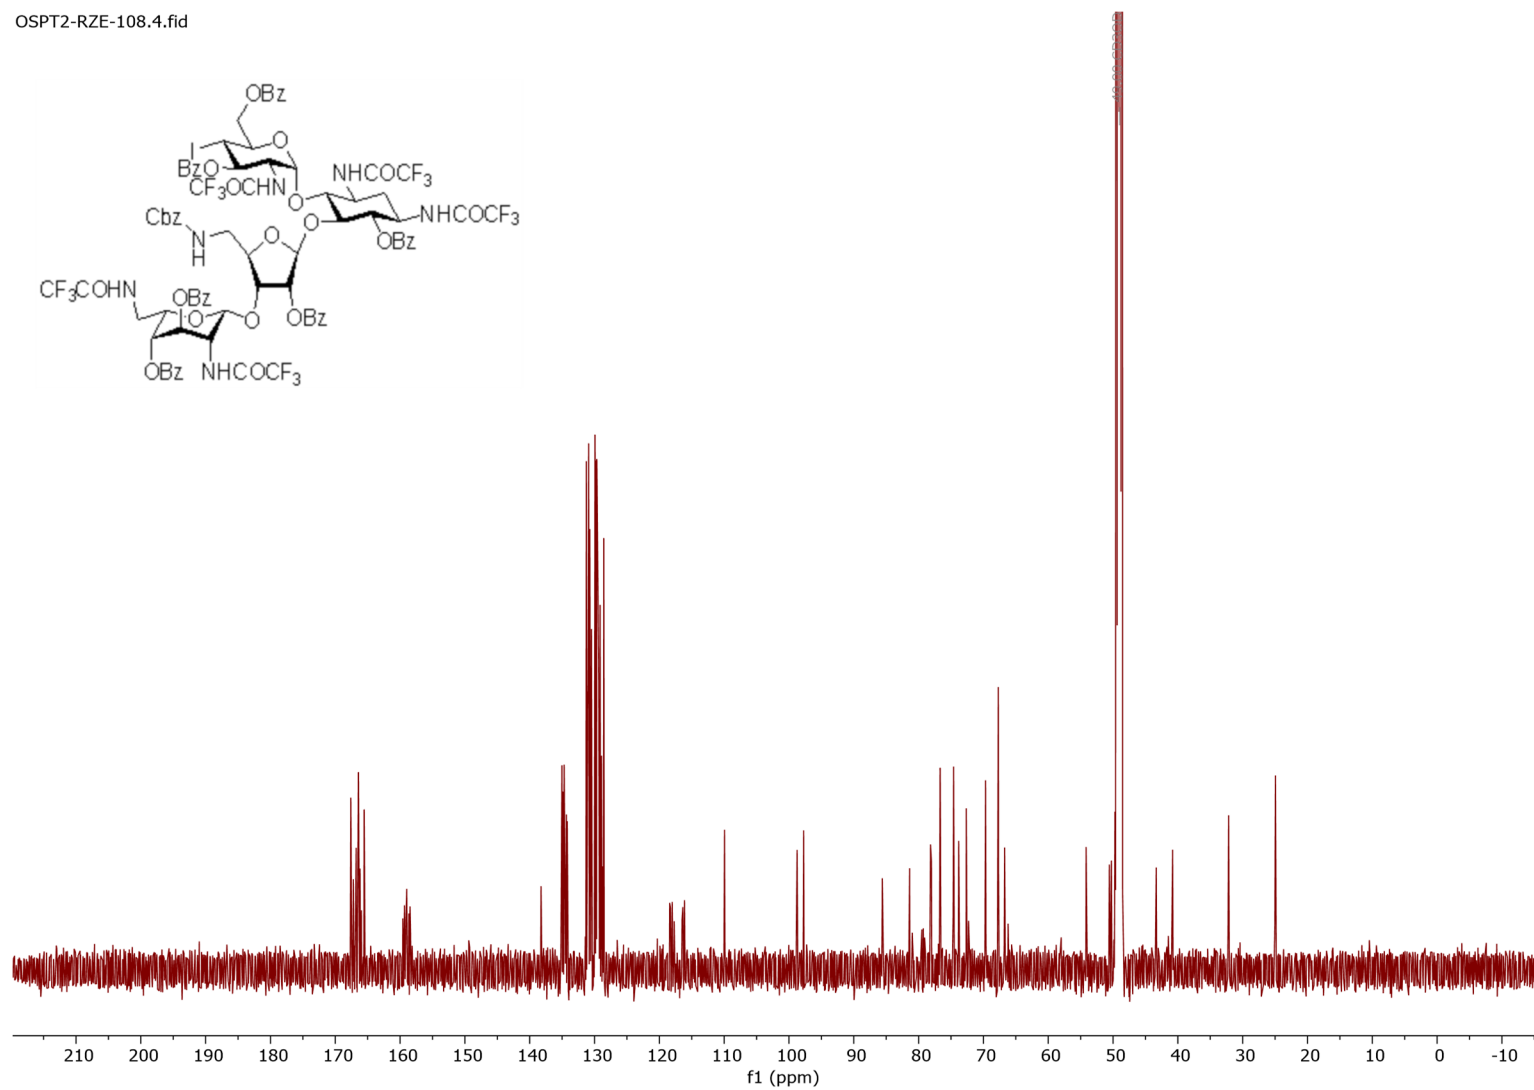





**4',5''-Dideoxy-5''-(*O*-benzylcarbamoyl)-6,3',6',2'',3''',4'''-hexa-*O*-benzoyl-4'-iodo-1,3,2',2''',6'''-penta-*N*-trifluoroacetyl paromomycin (29)**

[<sup>1</sup>H, <sup>13</sup>C HMBC, 600 MHz, 150.9 MHz, CD<sub>3</sub>OD]

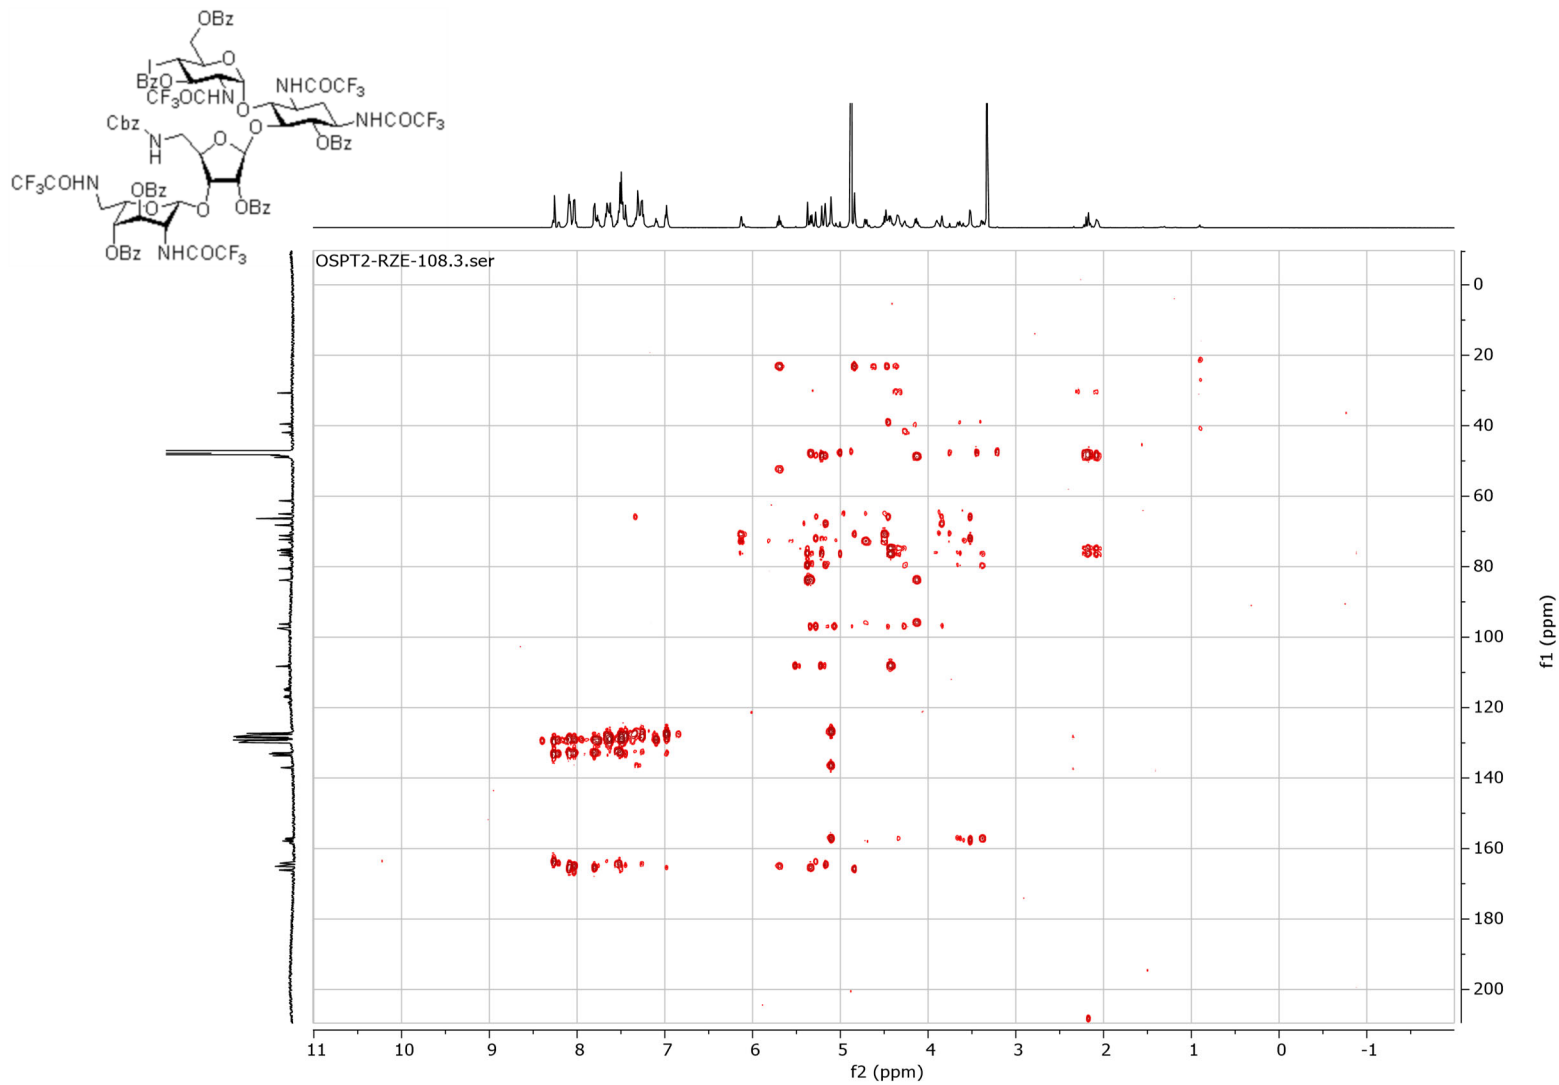

**4',5''-Dideoxy-5''-(*O*-benzylcarbamoyl)-6,3',6',2'',3''',4'''-hexa-*O*-benzoyl-4'-iodo-1,3,2''',6'''-penta-*N*-trifluoroacetyl paromomycin (29)**

[<sup>1</sup>H, <sup>1</sup>H ROESY, 600 MHz, CD<sub>3</sub>OD]

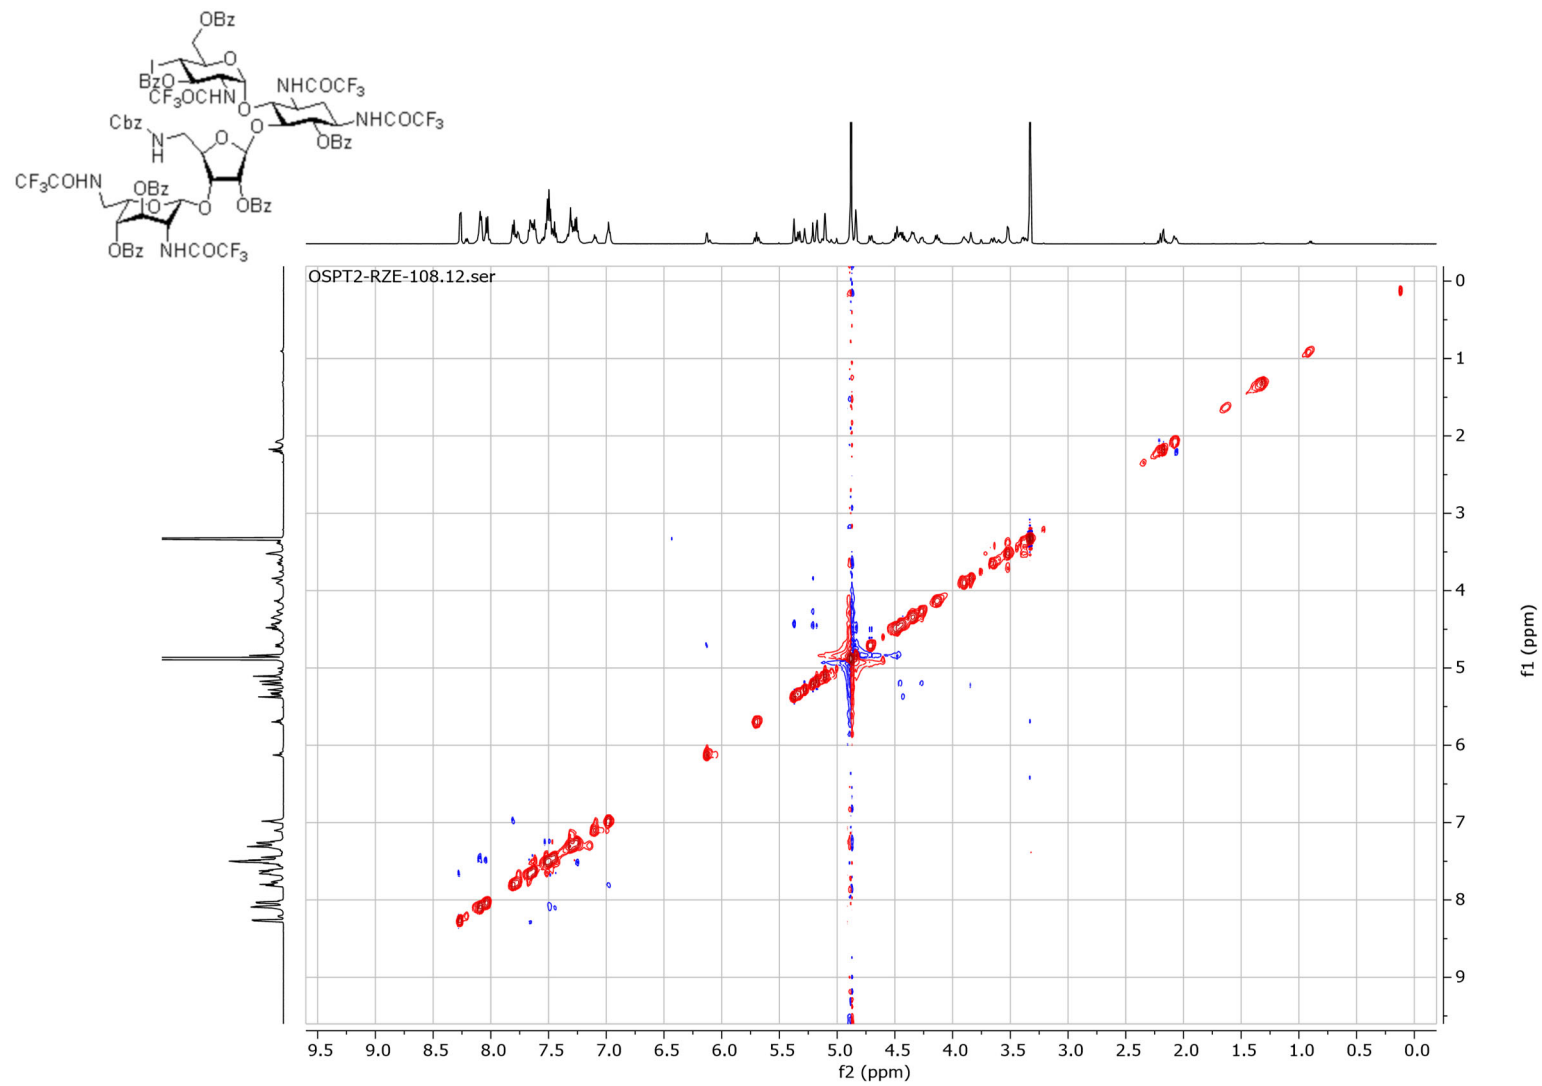

**4',5''-Dideoxy-5''-(*O*-benzylcarbamoyl)-6,3',6',2'',3''',4'''-hexa-*O*-benzoyl-4'-iodo-1,3,2',2''',6'''-penta-*N*-trifluoroacetyl paromomycin (29)**

[<sup>1</sup>H, <sup>1</sup>H COSY, 600 MHz, CD<sub>3</sub>OD]

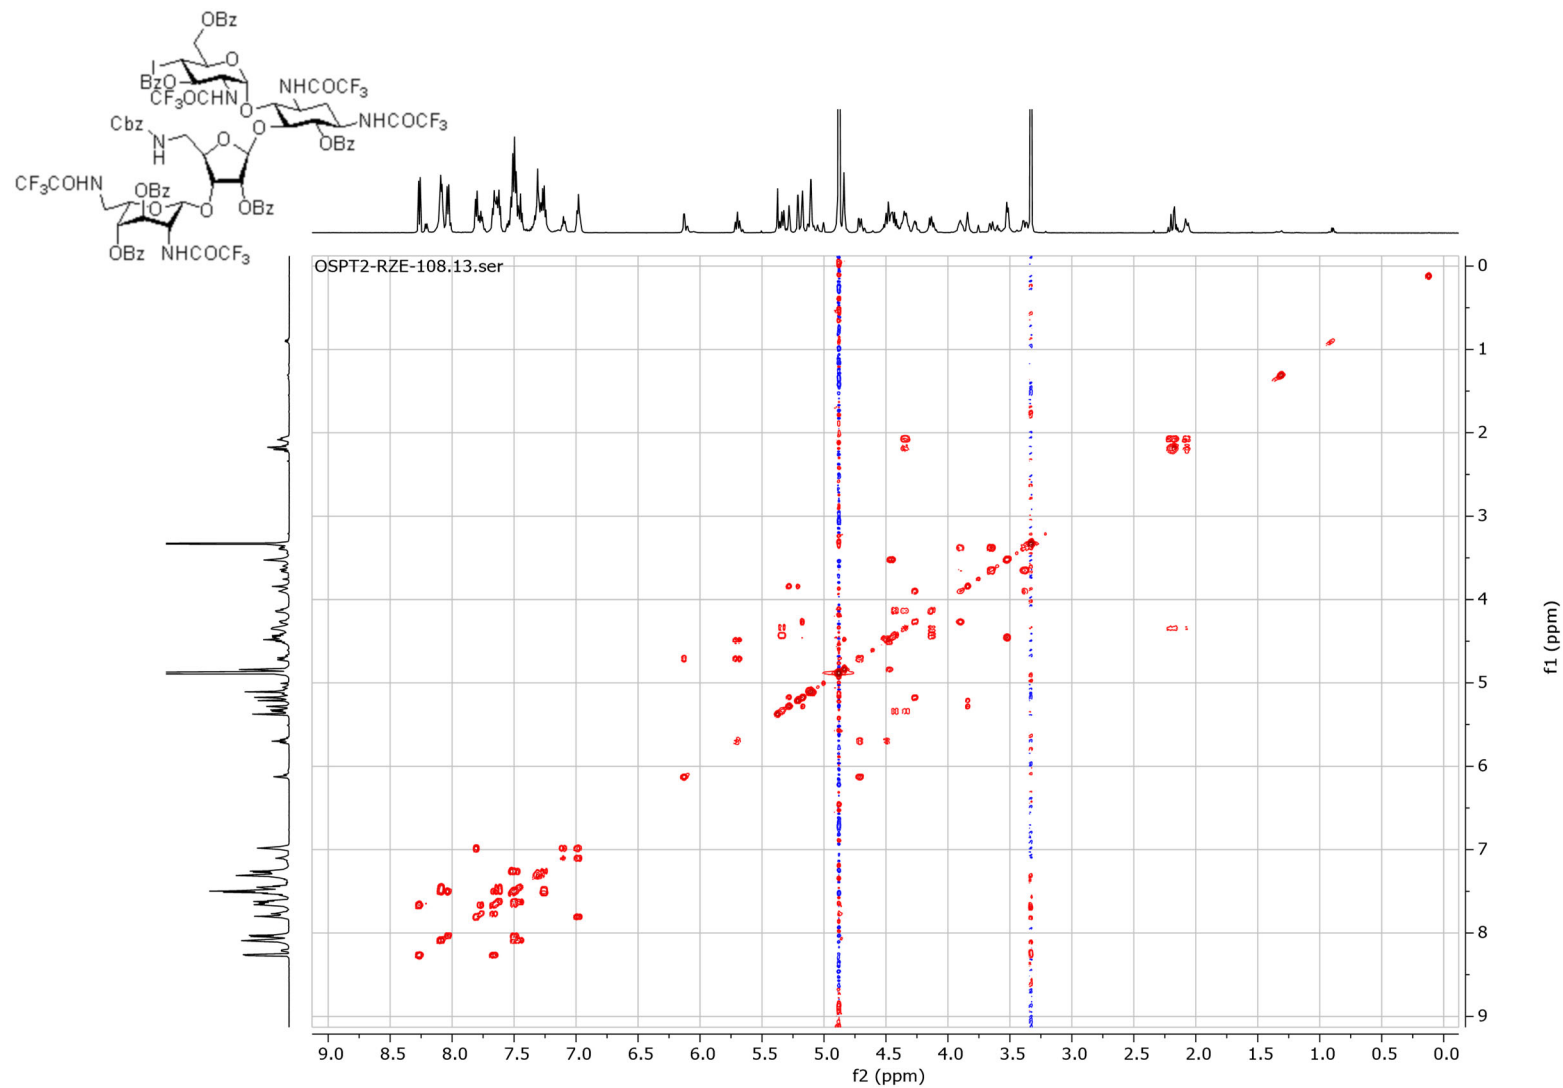

**4',5''-Dideoxy-5''-(*O*-benzylcarbamoyl)-6,3',6',2'',3''',4'''-hexa-*O*-benzoyl-4'-iodo-1,3,2',2''',6'''-penta-*N*-trifluoroacetyl paromomycin (29)**

[<sup>1</sup>H, <sup>1</sup>H DQF-COSY, 600 MHz, CD<sub>3</sub>OD]

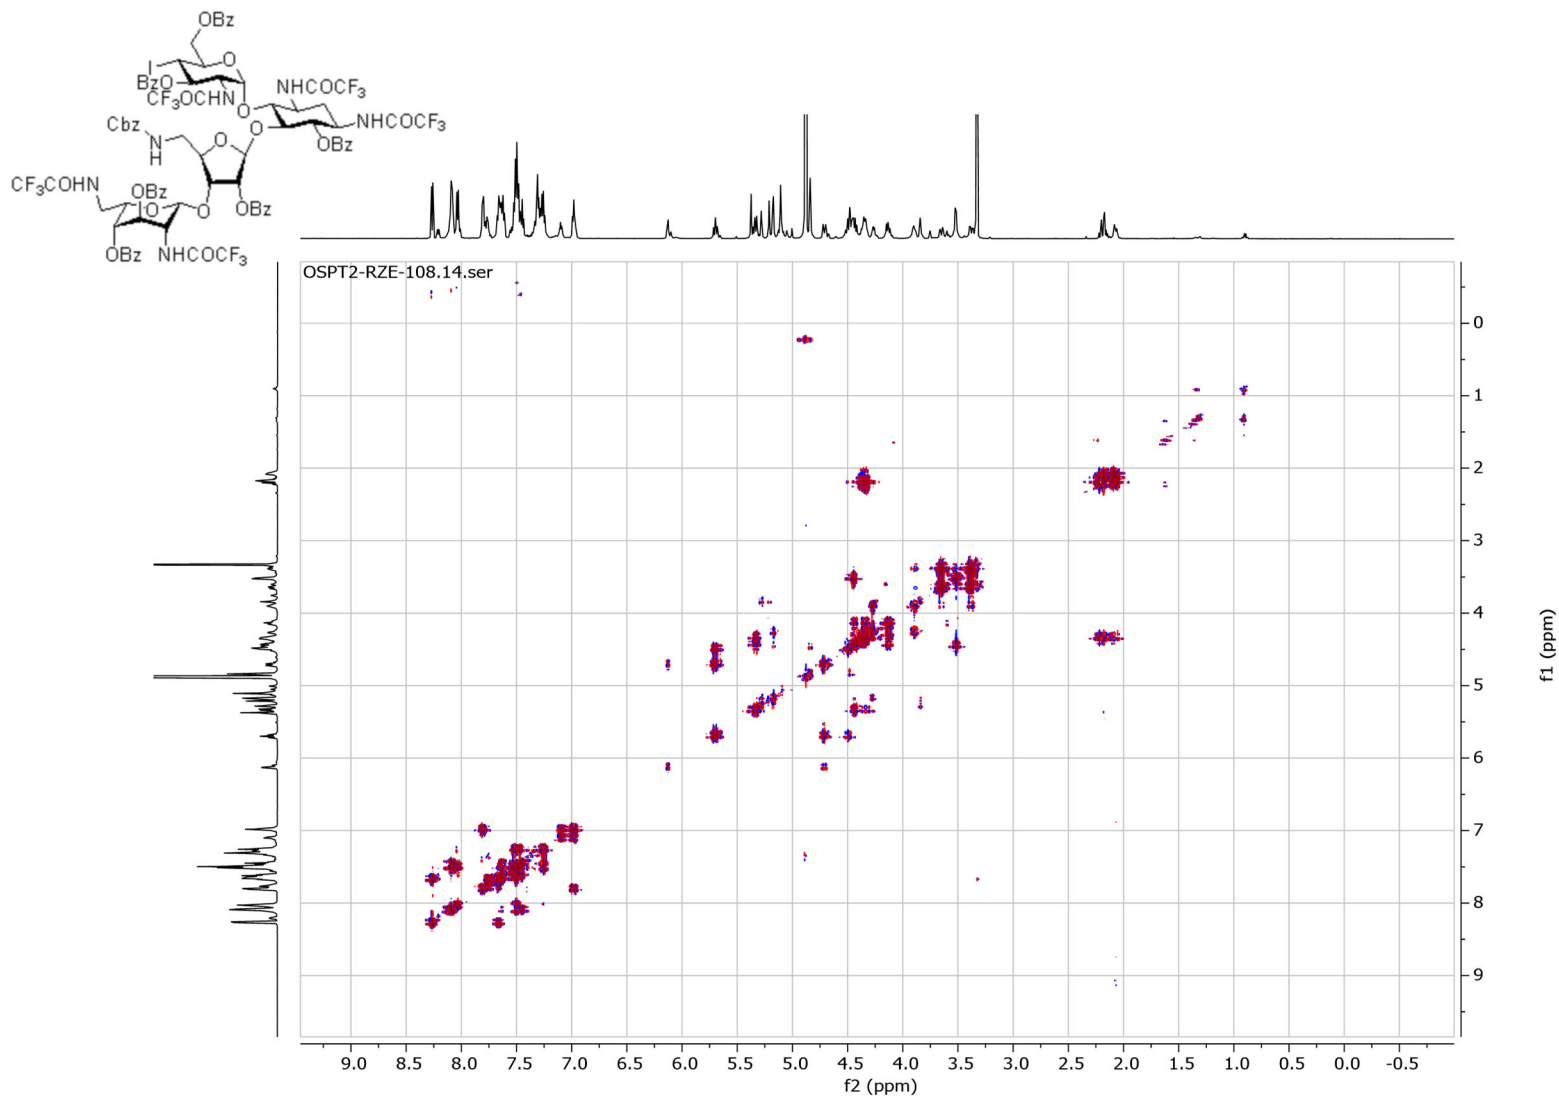

**4',5''-Dideoxy-5''-(*O*-benzylcarbamoyl)-6,3',6',2'',3''',4''''-hexa-*O*-benzoyl-4'-iodo-1,3,2',2''',6''''-penta-*N*-trifluoroacetyl paromomycin (29)**

Latvijas Organiskās sintēzes institūts  
Fizikāli organiskās ķīmijas laboratorija

**MS: Waters Synapt G2-Si** Capillary, kV: 0.7      **LC: Acquity UPLC H-Class** Column: Acquity UPLC BEH C18  
**ESI+** Cone, V: 40      2.1x50mm, 1.7µm

**Sample:**

HRMS\_2020\_04\_324 2183 Zogota RZE-108  
MS\_POS\_500-2300\_RES\_7min ACN\_Form\_5-98\_040\_7min 2:A,2 1.000000 MS\_Tune Col#66

**Elemental Composition Report:**

Single Mass Analysis  
Tolerance = 5.0 PPM / DBE: min = -1.5, max = 50.0  
Element prediction: Off  
Number of isotope peaks used for i-FIT = 5

Monoisotopic Mass, Even Electron Ions  
1619 formula(e) evaluated with 11 results within limits (up to 5 closest results for each mass)  
Elements Used:  
C: 0-100 H: 0-100 N: 0-10 O: 0-30 F: 15-15 Na: 1-1 I: 1-1

| Mass      | Calc. Mass | mDa  | PPM  | DBE  | i-FIT | Norm  | Conf(%) | Formula                  |
|-----------|------------|------|------|------|-------|-------|---------|--------------------------|
| 1985.3099 | 1985.3093  | 0.6  | 0.3  | 43.5 | 992.7 | 1.145 | 31.84   | C83 H70 N6 O25 F15 Na I  |
|           | 1985.3107  | -0.8 | -0.4 | 48.5 | 992.8 | 1.231 | 29.19   | C84 H66 N10 O21 F15 Na I |
|           | 1985.3080  | 1.9  | 1.0  | 38.5 | 992.8 | 1.161 | 31.33   | C82 H74 N2 O29 F15 Na I  |
|           | 1985.3120  | -2.1 | -1.1 | 42.5 | 994.7 | 3.093 | 4.54    | C87 H74 O27 F15 Na I     |
|           | 1985.3134  | -3.5 | -1.8 | 47.5 | 995.1 | 3.472 | 3.11    | C88 H70 N4 O23 F15 Na I  |

**2183 Zogota RZE-108**

HRMS\_2020\_04\_324 1734 (4.848) Cm (1731:1753-(1686:1709+1801:1826))

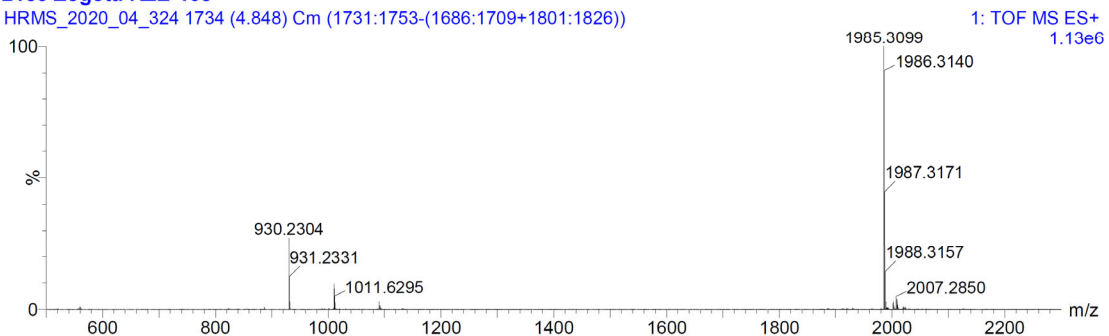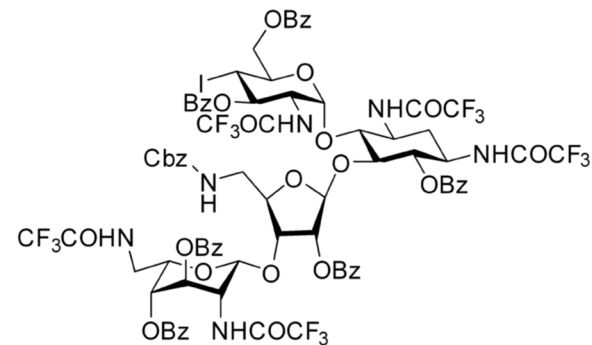

**4',5''-Dideoxy-5''-(*O*-benzylcarbamoyl)-6,3',6',2'',3''',4'''-hexa-*O*-benzoyl-1,3,2',2''',6'''-penta-*N*-trifluoroacetyl paromomycin (30-H)**

[<sup>1</sup>H-NMR, 400 MHz, CD<sub>3</sub>CN]

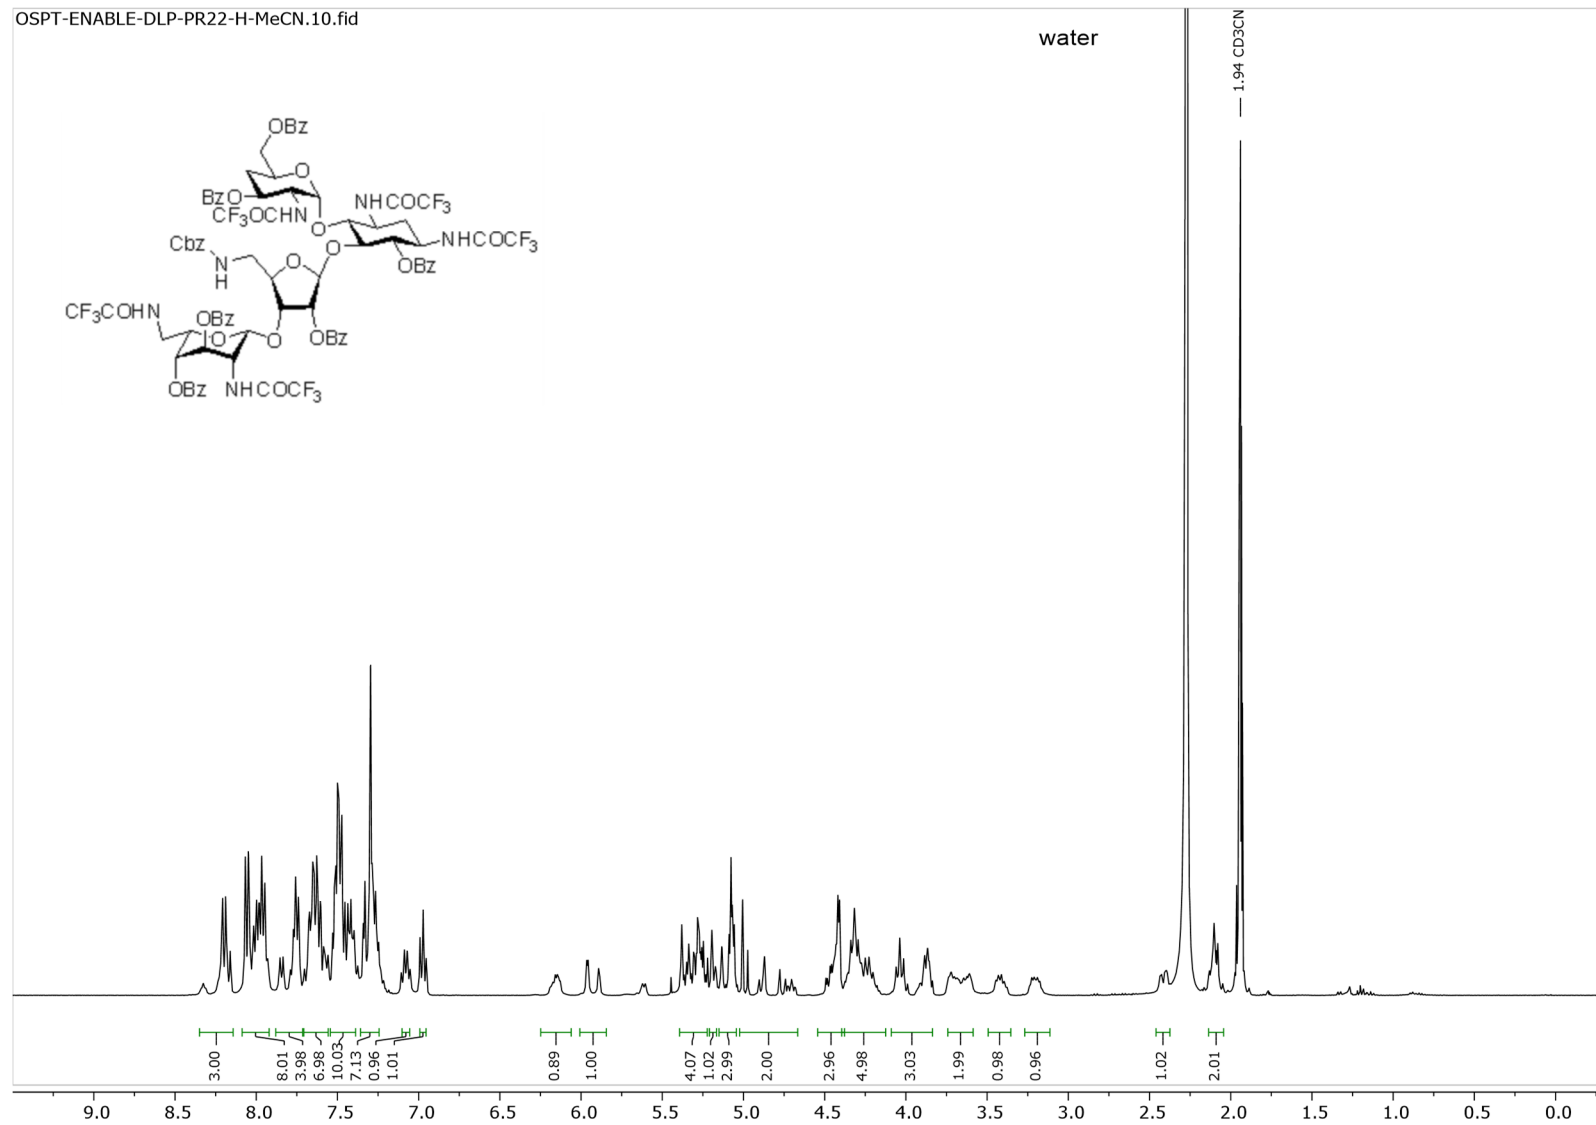

**4',5''-Dideoxy-5''-(*O*-benzylcarbamoyl)-6,3',6',2'',3''',4'''-hexa-*O*-benzoyl-1,3,2',2''',6'''-penta-*N*-trifluoroacetyl paromomycin (30-H)**

[<sup>13</sup>C-NMR, 100.6 MHz, CD<sub>3</sub>CN]

OSPT-ENABLE-DLP-PR22-H-MeCN.11.fid

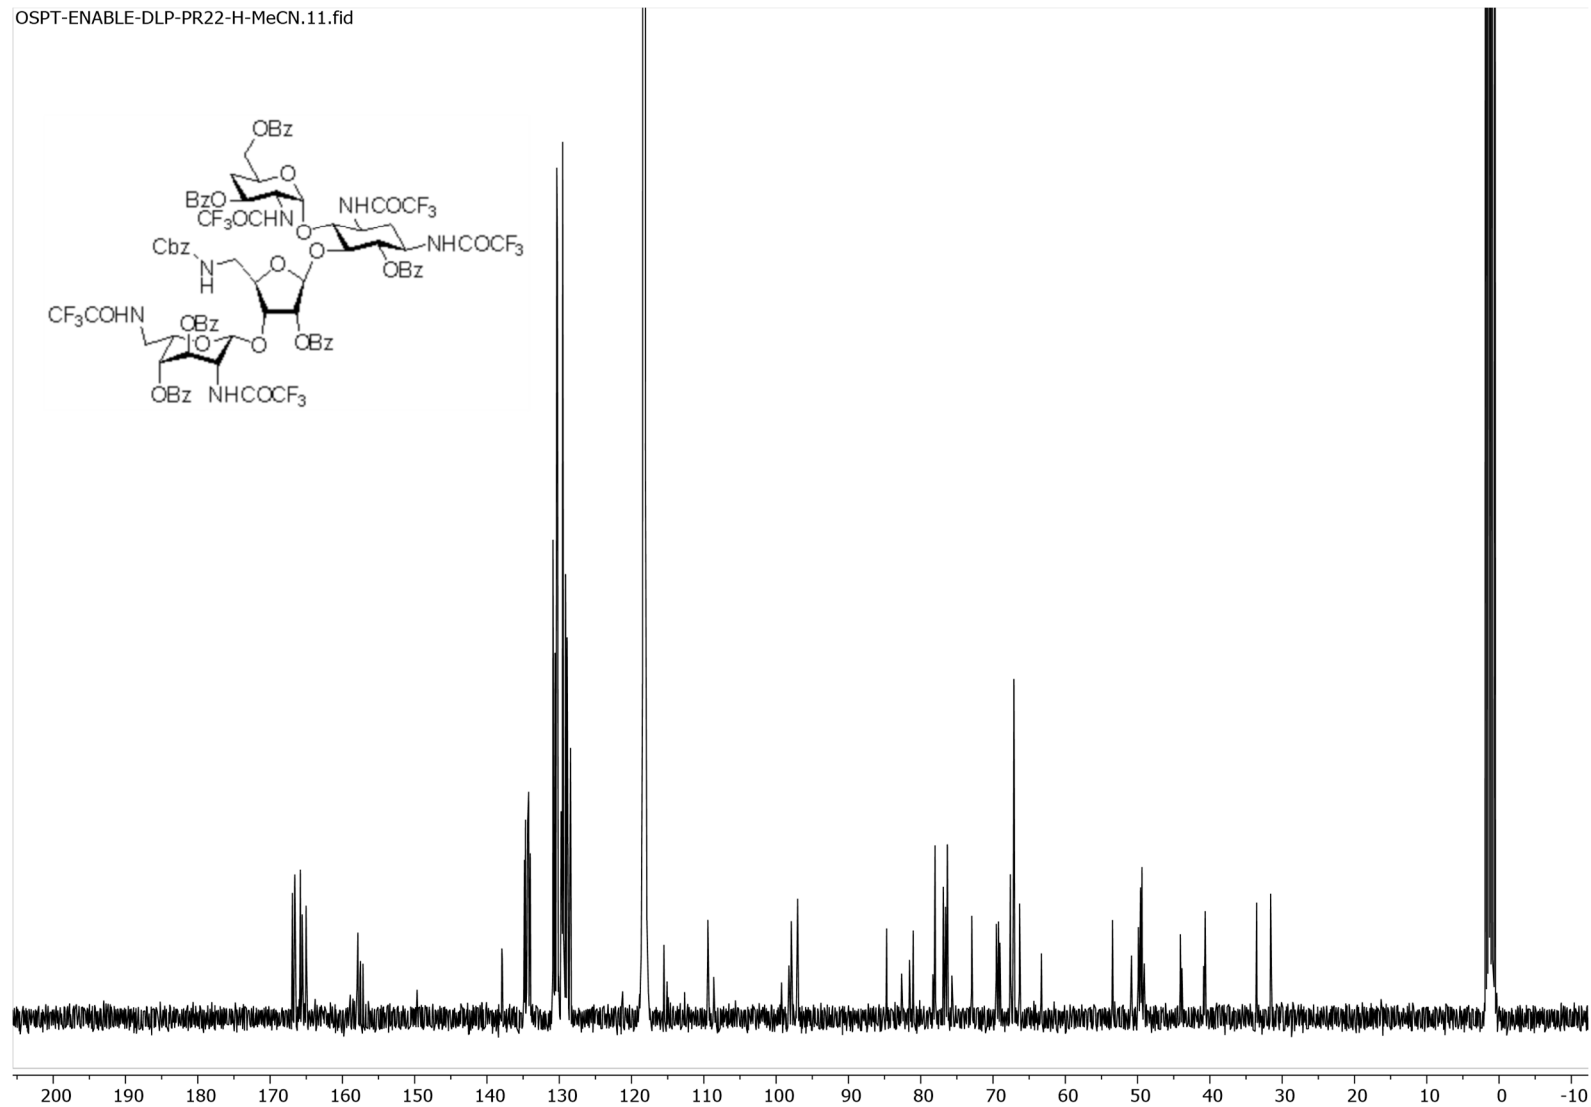



**4',5''-Dideoxy-5''-(*O*-benzylcarbamoyl)-6,3',6',2'',3''',4'''-hexa-*O*-benzoyl-1,3,2',2''',6'''-penta-*N*-trifluoroacetyl paromomycin (30-H)**

[<sup>1</sup>H, <sup>13</sup>C HSQC, 400 MHz, 100.6 MHz, CD<sub>3</sub>CN]

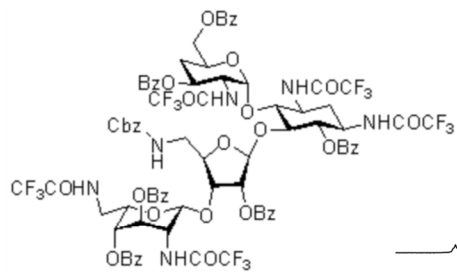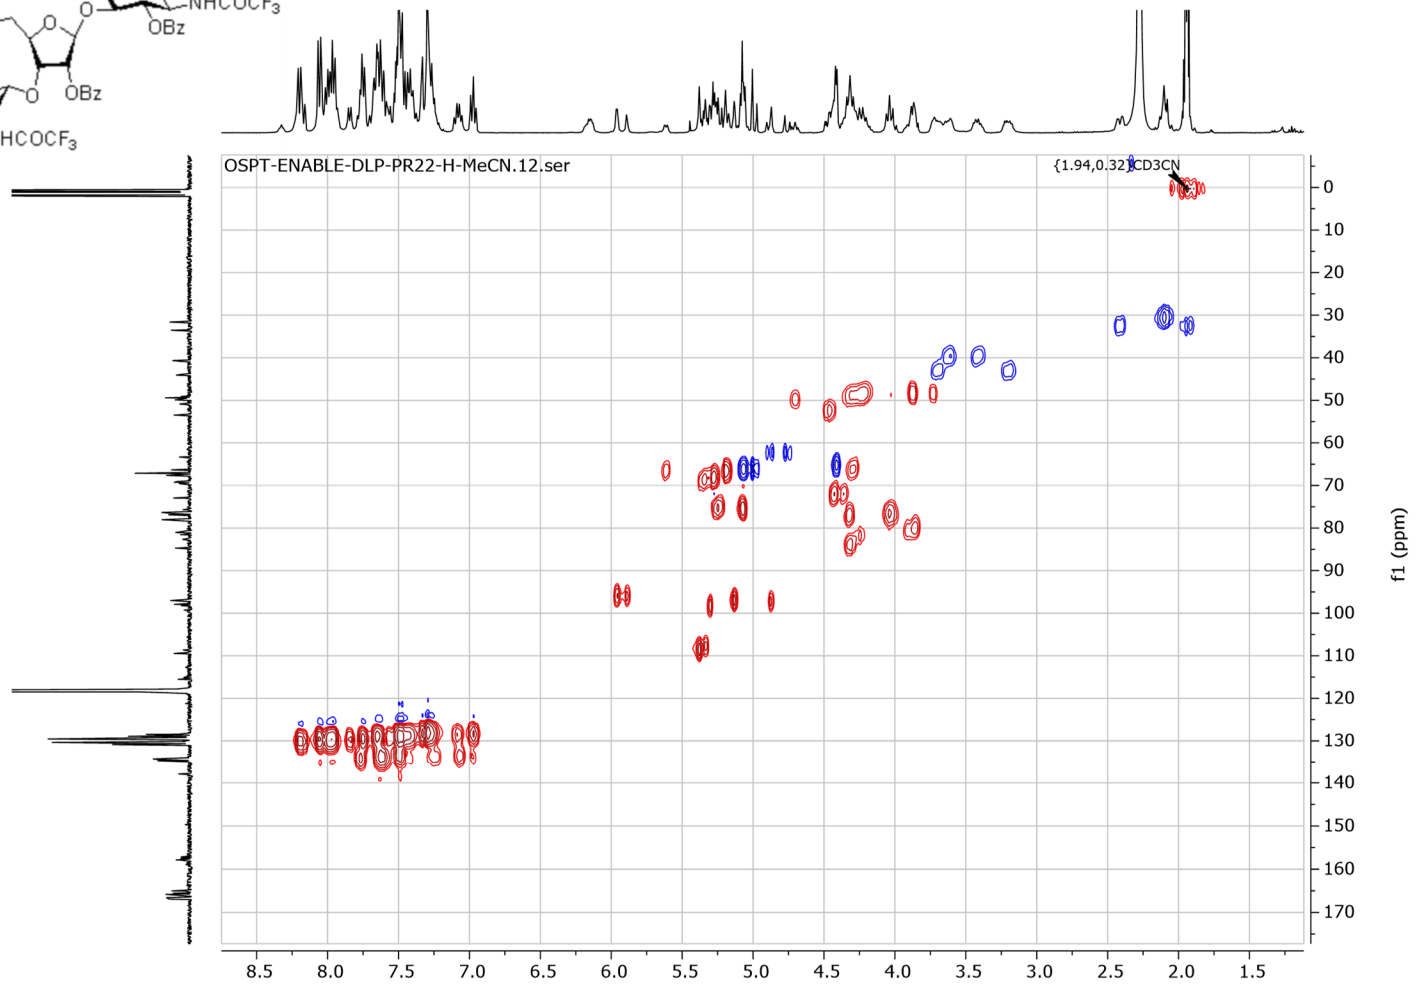

**4',5''-Dideoxy-5''-(*O*-benzylcarbamoyl)-6,3',6',2'',3''',4'''-hexa-*O*-benzoyl-1,3,2',2''',6'''-penta-*N*-trifluoroacetyl paromomycin (30-H)**

[<sup>1</sup>H, <sup>13</sup>C HMBC, 400 MHz, 100.6 MHz, CD<sub>3</sub>CN]

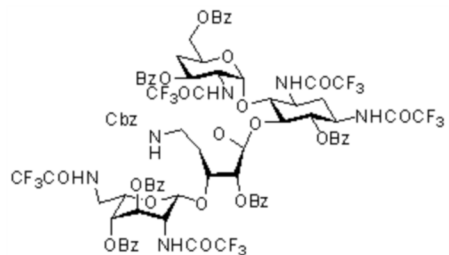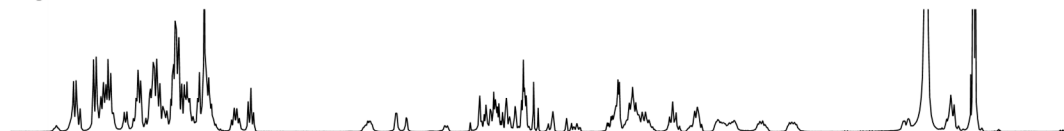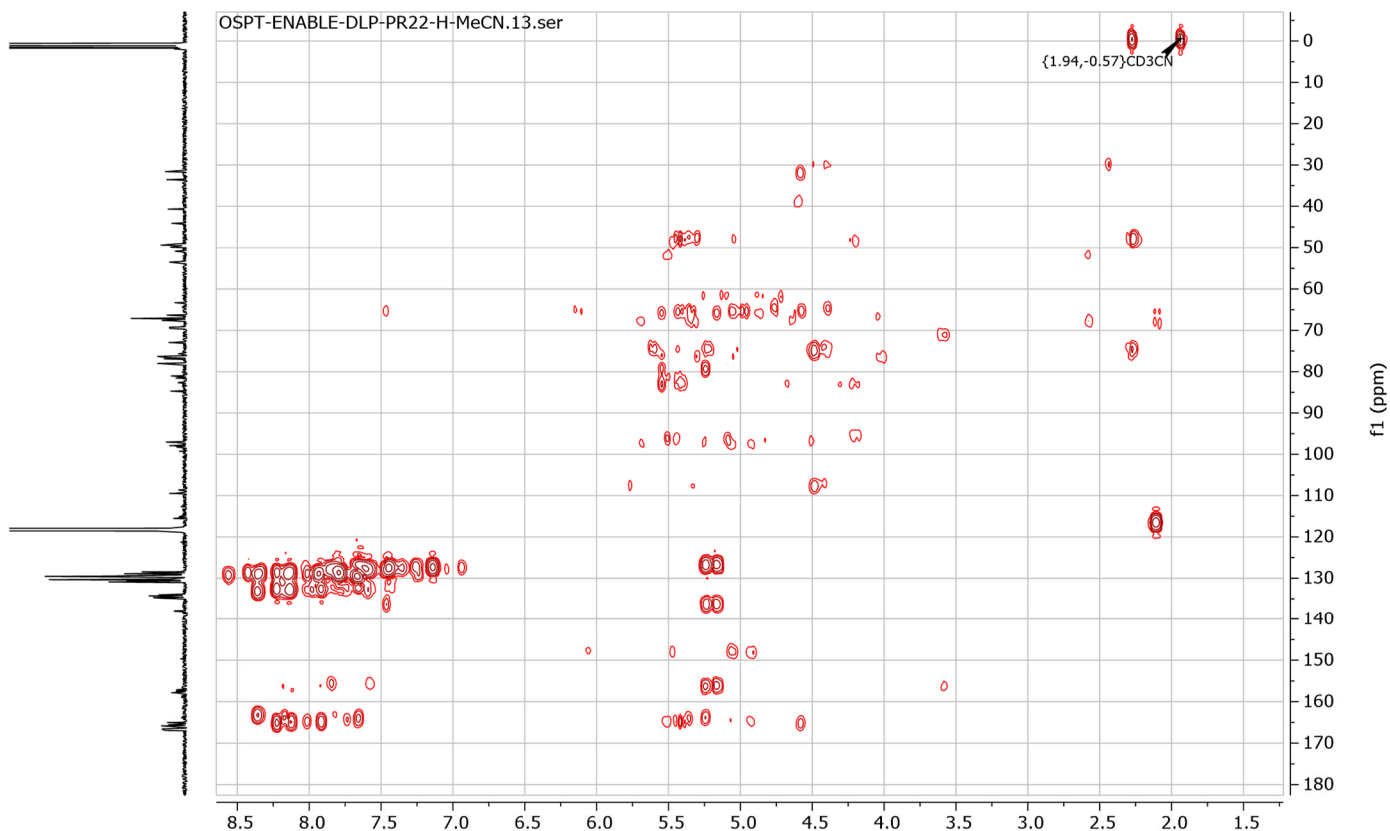

## 4',5''-Dideoxy-5''-(*O*-benzylcarbamoyl)-6,3',6',2'',3''',4'''-hexa-*O*-benzoyl-1,3,2',2''',6'''-penta-*N*-trifluoroacetyl paromomycin (30-H)

Latvijas Organiskās sintēzes institūts  
Fizikāli organiskās ķīmijas laboratorija

**MS: Waters Synapt G2-Si** Capillary, kV: 0.7      **LC: Acquity UPLC H-Class** Column: Acquity UPLC BEH C18  
**ESI+** Cone, V: 40      2.1x50mm, 1.7µm

### Sample:

HRMS\_2021\_03\_367 484 Lubriks DLP-PR22-H  
MS\_POS\_500-2000\_RES\_7min ACN\_Form\_5-98\_040\_7min 1:C,7 1.000000 MS\_Tune Col#66

### Elemental Composition Report:

Tolerance = 5.0 PPM / DBE: min = -1.5, max = 50.0

Element prediction: Off

Number of isotope peaks used for i-FIT = 5

Monoisotopic Mass, Even Electron Ions

3951 formula(e) evaluated with 15 results within limits (up to 5 closest results for each mass)

Elements Used:

C: 0-100 H: 0-100 N: 0-25 O: 0-25 Na: 1-1 F: 15-15

| Mass      | RA     | Calc. Mass | mDa  | PPM  | DBE  | i-FIT | Norm  | Conf(%) | Formula                |
|-----------|--------|------------|------|------|------|-------|-------|---------|------------------------|
| 1859.4147 | 100.00 | 1859.4145  | 0.2  | 0.1  | 41.5 | 852.6 | 0.258 | 77.26   | C69 H63 N22 O22 Na F15 |
|           |        | 1859.4140  | 0.7  | 0.4  | 48.5 | 857.2 | 4.817 | 0.81    | C84 H67 N10 O21 Na F15 |
|           |        | 1859.4167  | -2.0 | -1.1 | 47.5 | 857.3 | 4.952 | 0.71    | C88 H71 N4 O23 Na F15  |
|           |        | 1859.4127  | 2.0  | 1.1  | 43.5 | 857.1 | 4.743 | 0.87    | C83 H71 N6 O25 Na F15  |
|           |        | 1859.4172  | -2.5 | -1.3 | 40.5 | 854.0 | 1.592 | 20.35   | C73 H67 N16 O24 Na F15 |

### 484 Lubriks DLP-PR22-H

HRMS\_2021\_03\_367 1618 (4.525) Cm (1618:1627-1572:1592)

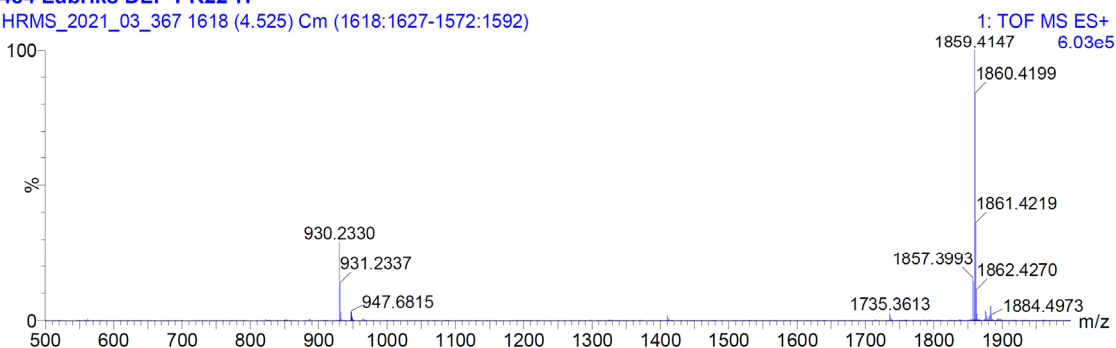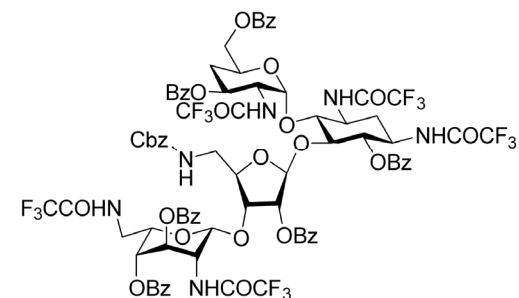

**4',5''-Dideoxy-4'-propyl-5''-amino-6,3',6',2'',3''',4''-hexa-O-benzoyl-1,3,2',2''',6''-penta-N-trifluoroacetyl paromomycin (31)**

[<sup>1</sup>H-NMR, 400 MHz, CD<sub>3</sub>OD]

OSPT2-DIMI-1168.10.fid

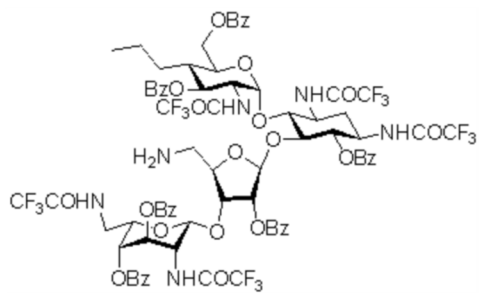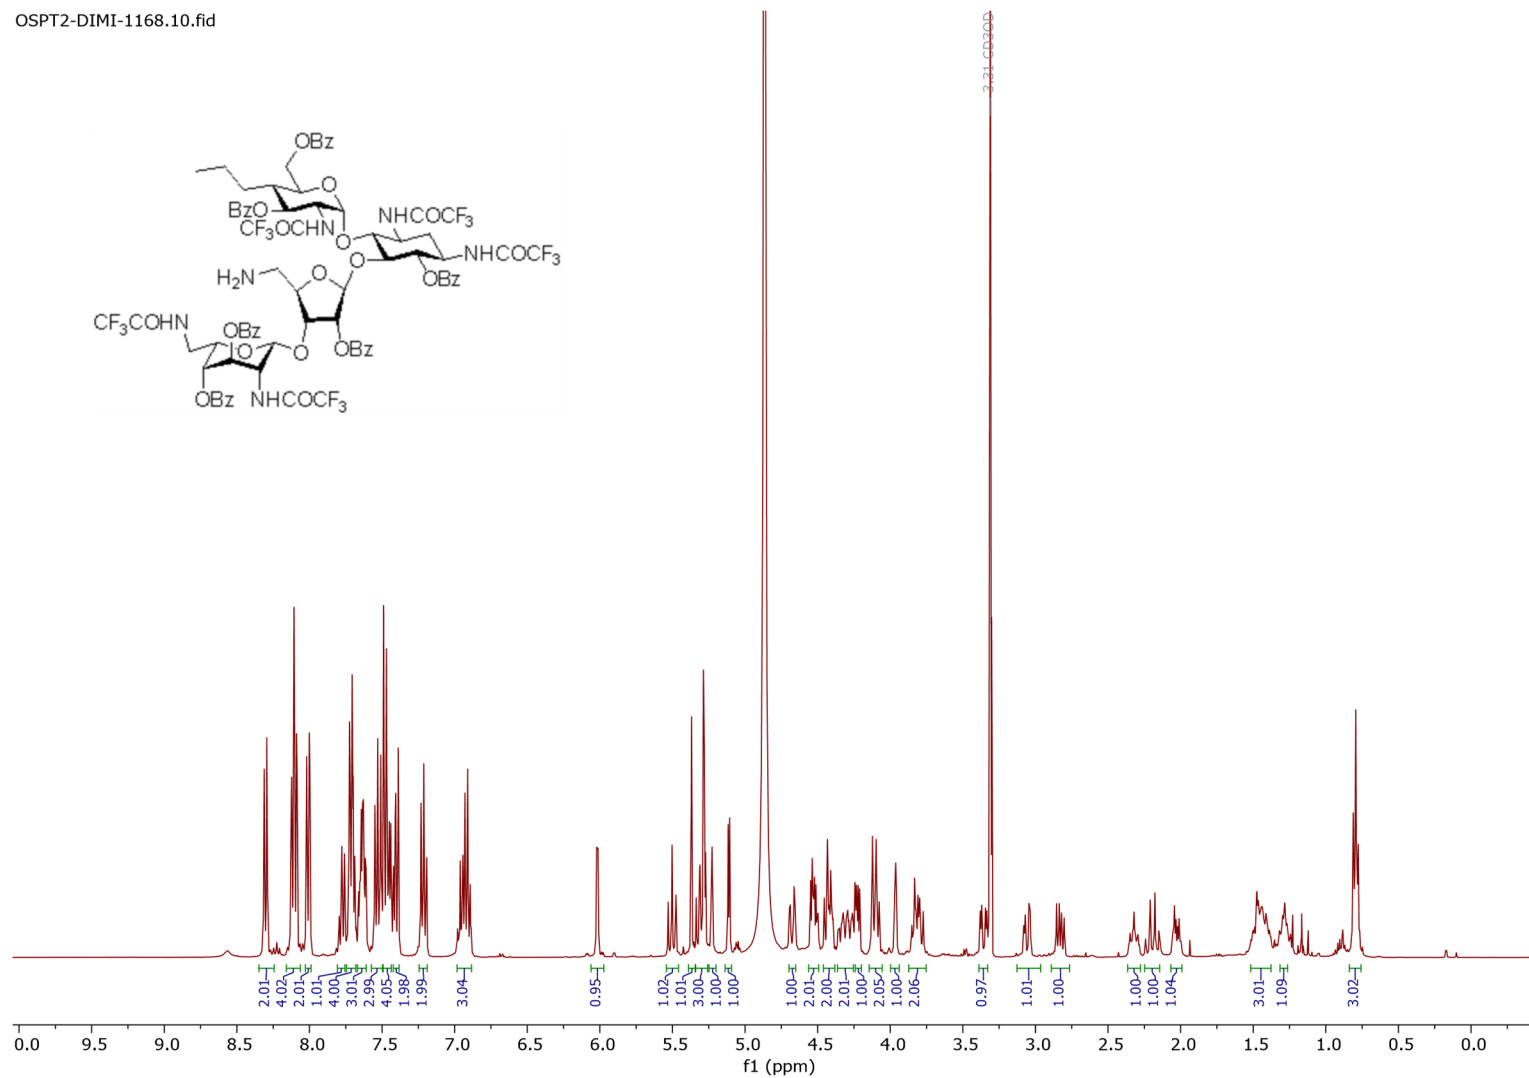

**4',5''-Dideoxy-4'-propyl-5''-amino-6,3',6',2'',3''',4'''-hexa-O-benzoyl-1,3,2',2''',6'''-penta-N-trifluoroacetyl paromomycin (31)**

[<sup>13</sup>C-NMR, 100.6 MHz, CD<sub>3</sub>OD]

OSPT2-DIMI-1168.11.fid

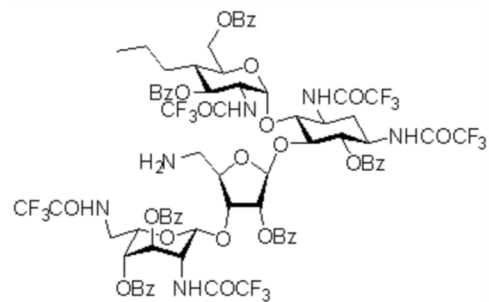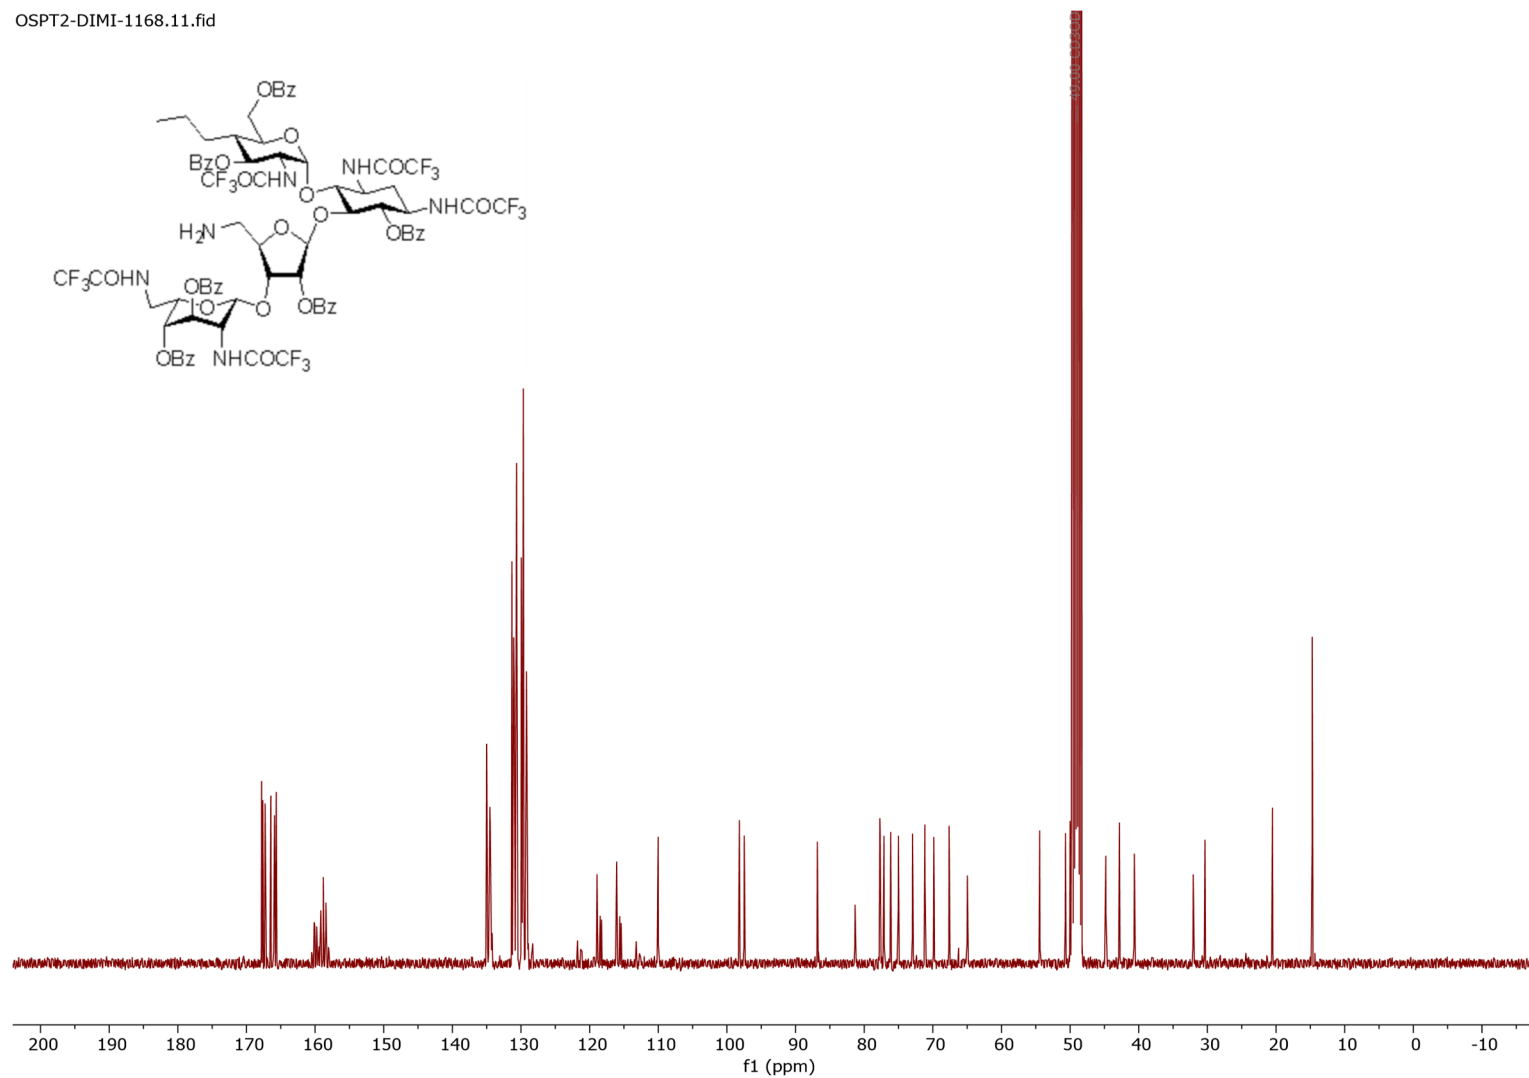

**4',5''-Dideoxy-4'-propyl-5''-amino-6,3',6',2'',3''',4''''-hexa-O-benzoyl-1,3,2',2''',6''-penta-N-trifluoroacetyl paromomycin (31)**

Latvijas Organiskās sintēzes institūts  
Fizikāli organiskās ķīmijas laboratorija

MS: Waters Synapt G2-Si Capillary, kV: 0.7 LC: Acquity UPLC H-Class Column: Acquity UPLC BEH C18  
ESI+ Cone, V: 40 2.1x50mm, 1.7µm

**Sample:**

HRMS\_2019\_08\_449 1010 Zogota RZE-48  
MS\_POS\_500-2000\_RES\_7min ACN\_Form\_5-98\_040\_7min 1:D,6 10.000000 MS\_Tune Col#43

**Elemental Composition Report:**

Tolerance = 5.0 PPM / DBE: min = -1.5, max = 50.0  
Element prediction: Off  
Number of isotope peaks used for i-FIT = 3

Monoisotopic Mass, Even Electron Ions  
276 formula(e) evaluated with 2 results within limits (all results (up to 1000) for each mass)  
Elements Used:  
C: 0-78 H: 1-110 N: 1-10 O: 0-23 F: 15-15

| Mass      | RA     | Calc. Mass | mDa  | PPM  | DBE  | i-FIT | Norm  | Conf(%) | Formula            |
|-----------|--------|------------|------|------|------|-------|-------|---------|--------------------|
| 1745.4438 | 100.00 | 1745.4409  | 2.9  | 1.7  | 38.5 | 271.4 | 0.132 | 87.59   | C78 H72 N6 O23 F15 |
|           |        | 1745.4522  | -8.4 | -4.8 | 38.5 | 273.4 | 2.087 | 12.41   | C77 H72 N8 O22 F15 |

**1010 Zogota RZE-48**

HRMS\_2019\_08\_449 1240 (3.474)

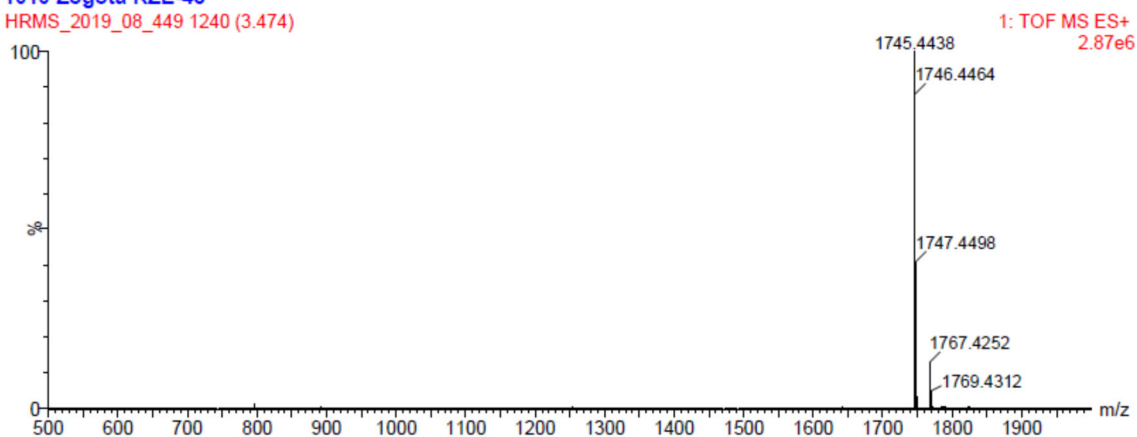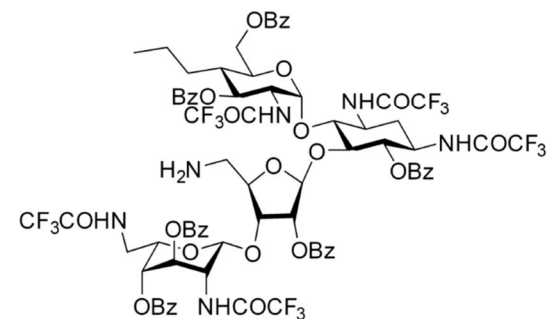

**2,2,2-Trifluoro-N-(2-hydroxyethyl)acetamide (S1)**

[<sup>1</sup>H-NMR, 300 MHz, CDCl<sub>3</sub>]

OSPT-DIMI-1149.10.fid

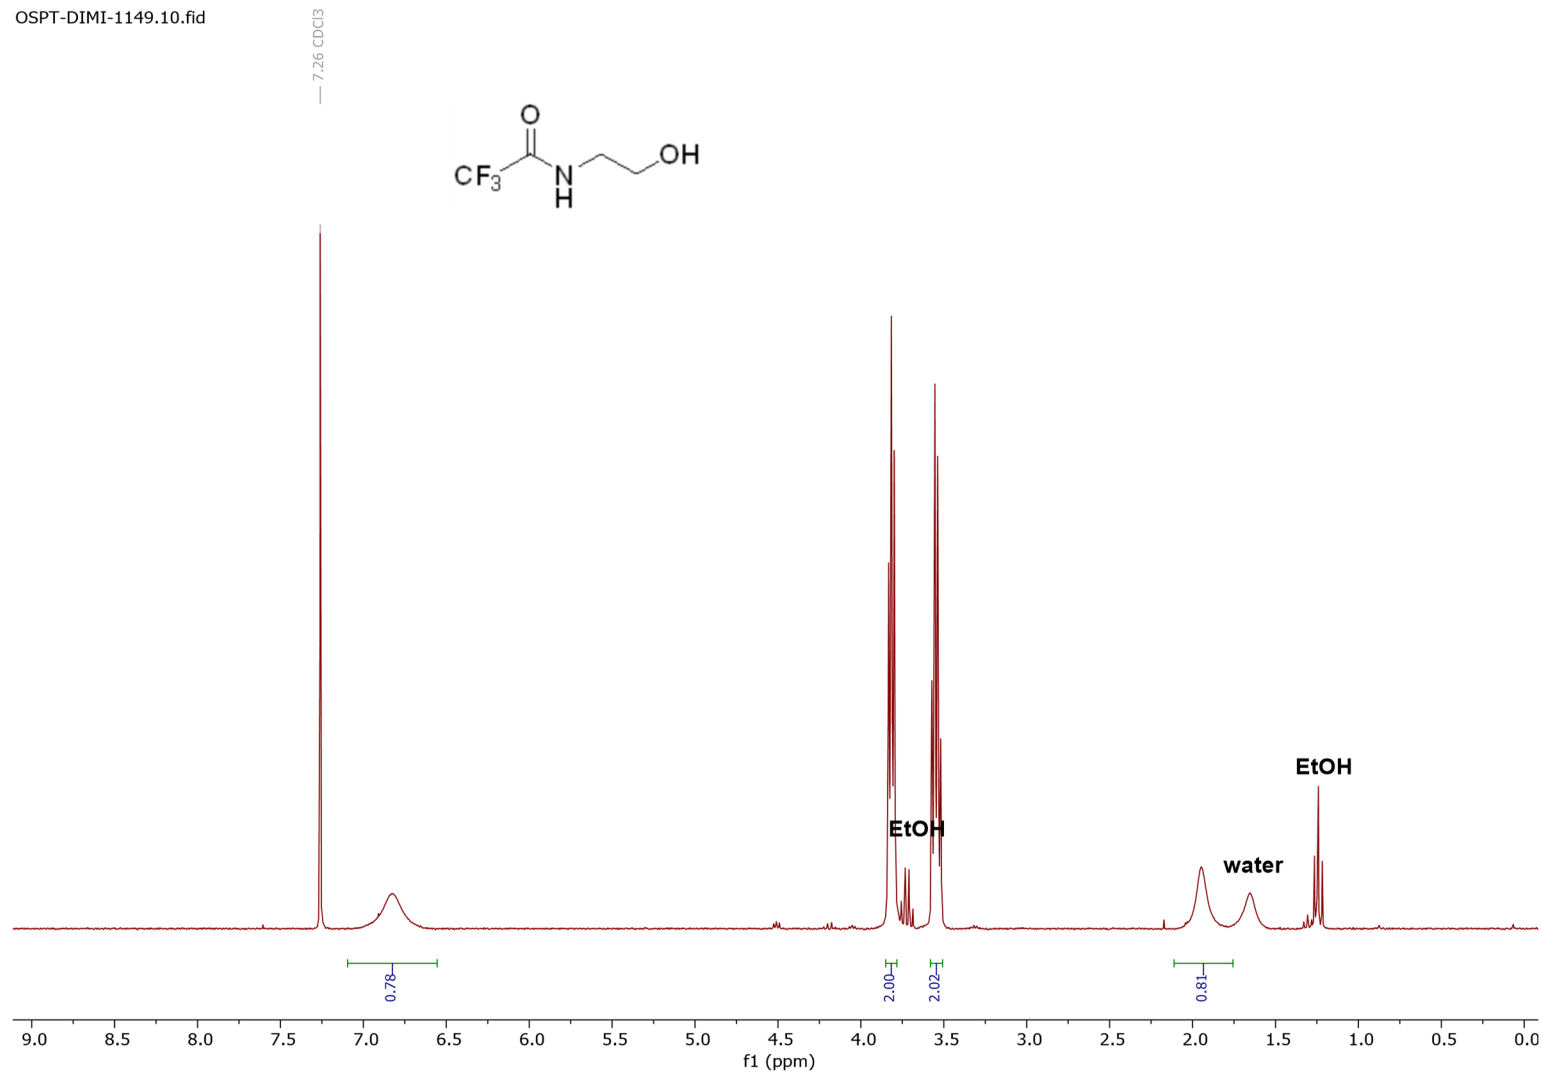

**2,2,2-Trifluoro-*N*-(2-oxoethyl)acetamide (32)**

[<sup>1</sup>H-NMR, 400 MHz, CDCl<sub>3</sub>]

OSPT2-DIMI-1150pr.10.fid

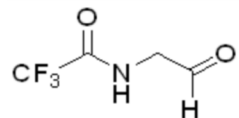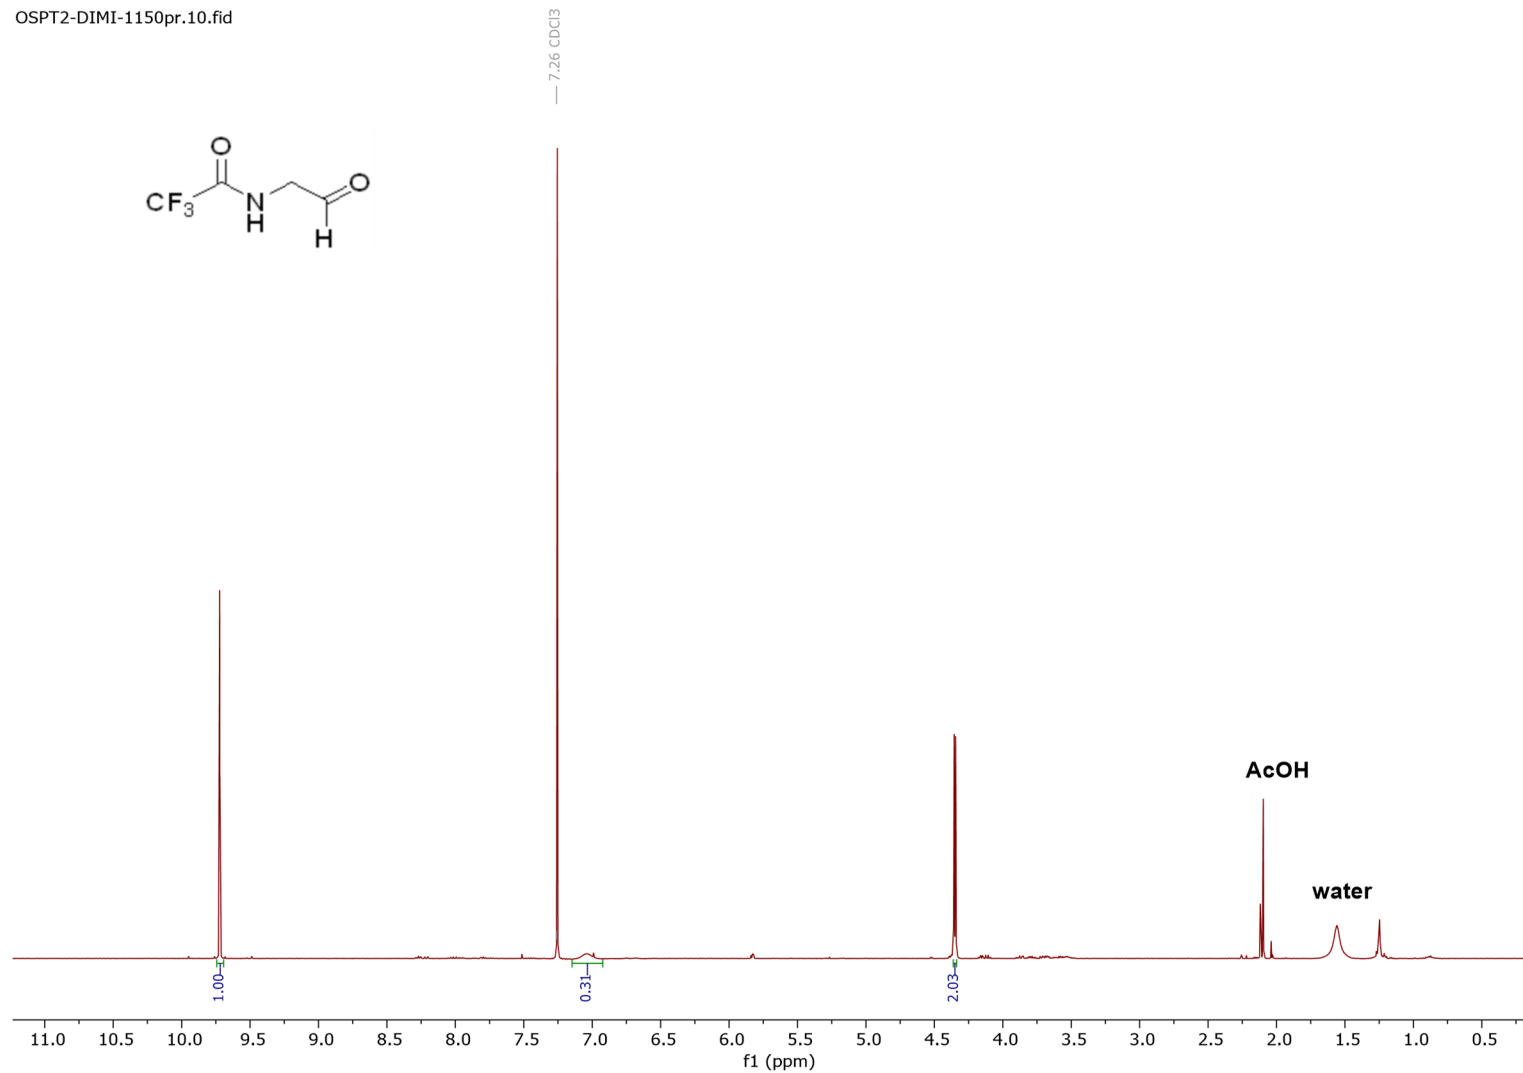



**2,2,2-Trifluoro-N-(3-oxopropyl)acetamide (33)**

[<sup>1</sup>H-NMR, 400 MHz, CDCl<sub>3</sub>]

OSPT2-DIMI-1184.10.fid

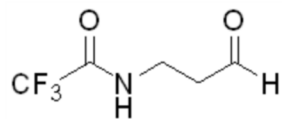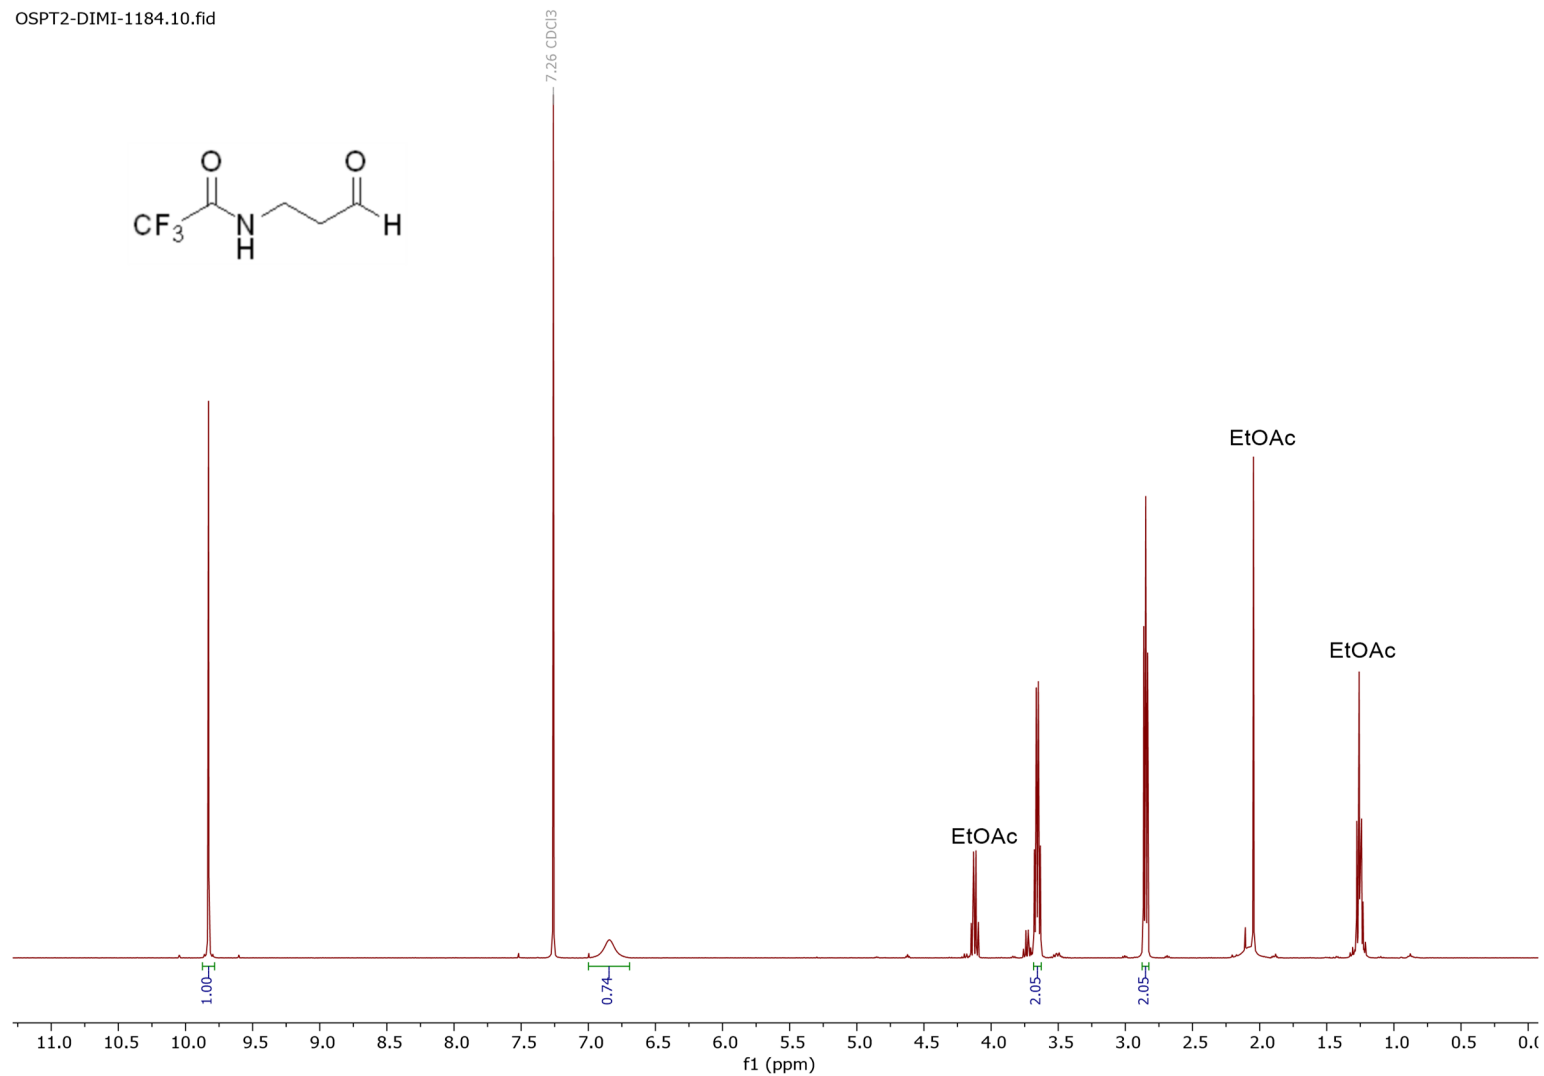

**4',5''-Dideoxy-4'-propyl-5''-(2-aminoethylamino)-1,2-ethanediamine)-6,3',6',2'',3''',4'''-hexa-O-benzoyl-hepta-N-trifluoroacetyl paromomycin (36)**

[<sup>1</sup>H-NMR, 600 MHz, CD<sub>3</sub>OD]

OSPT2-RZE-53.1.fid

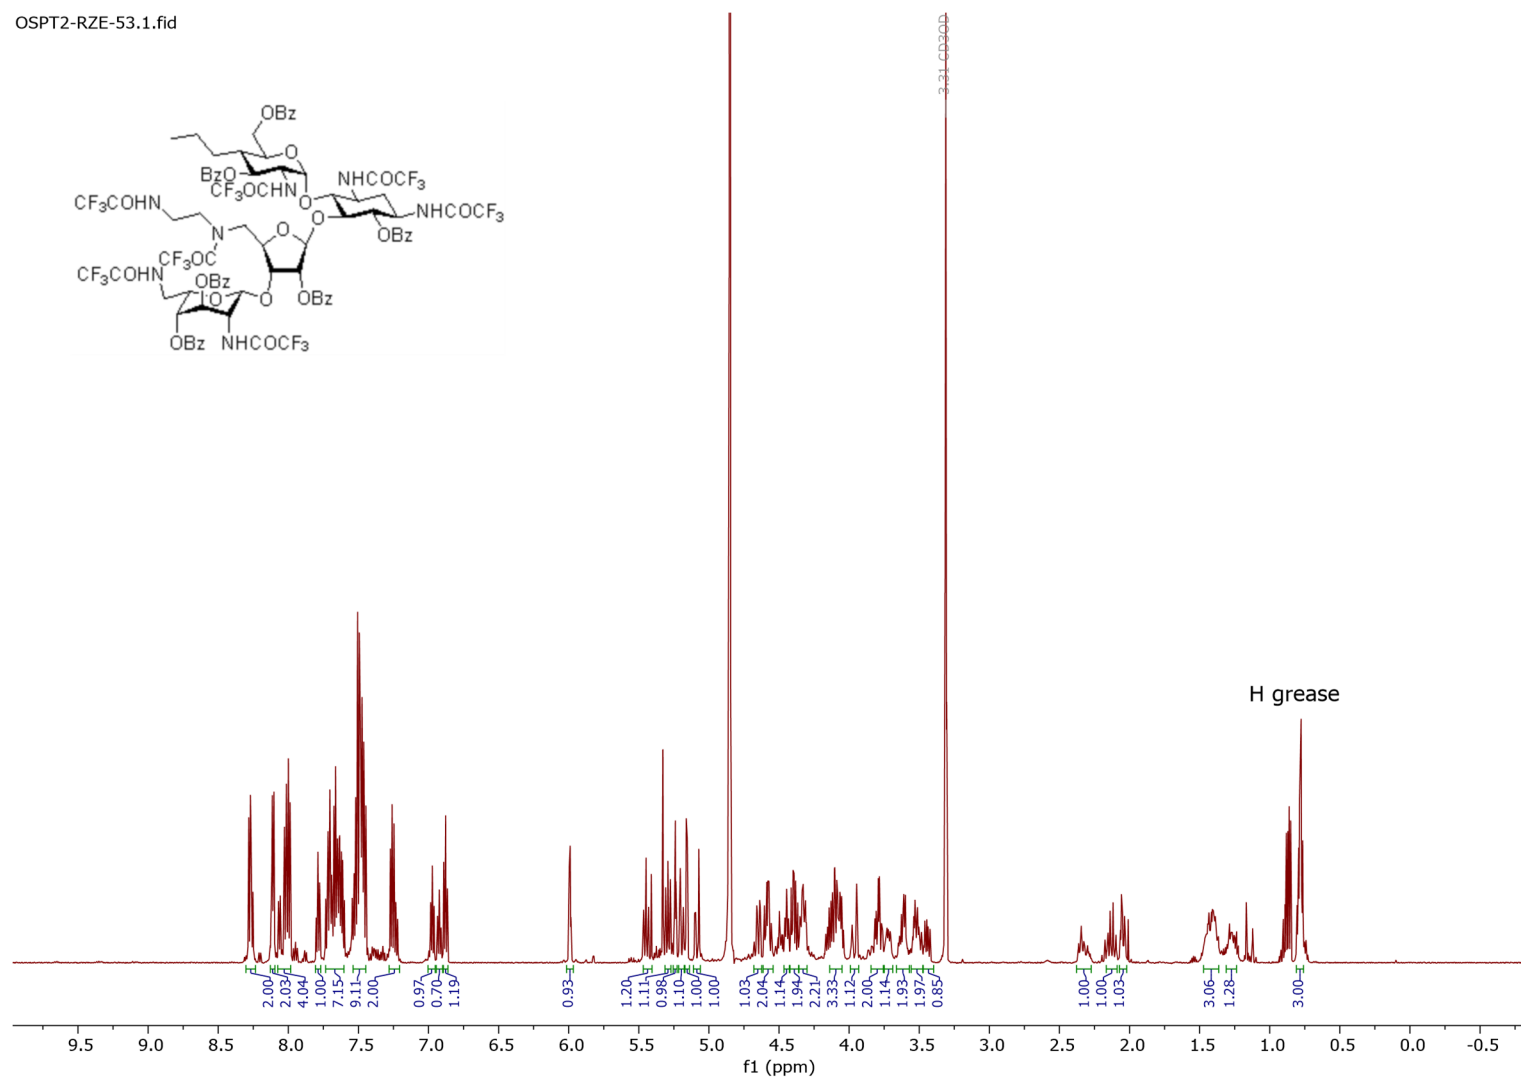

**4',5''-Dideoxy-4'-propyl-5''-(2-aminoethylamino)-1,2-ethanediamine)-6,3',6',2'',3''',4'''-hexa-O-benzoyl-hepta-N-trifluoroacetyl paromomycin (36)**

[<sup>13</sup>C-NMR, 150.9 MHz, CD<sub>3</sub>OD]

OSPT2-RZE-53.4.fid

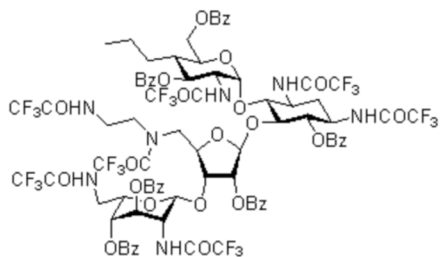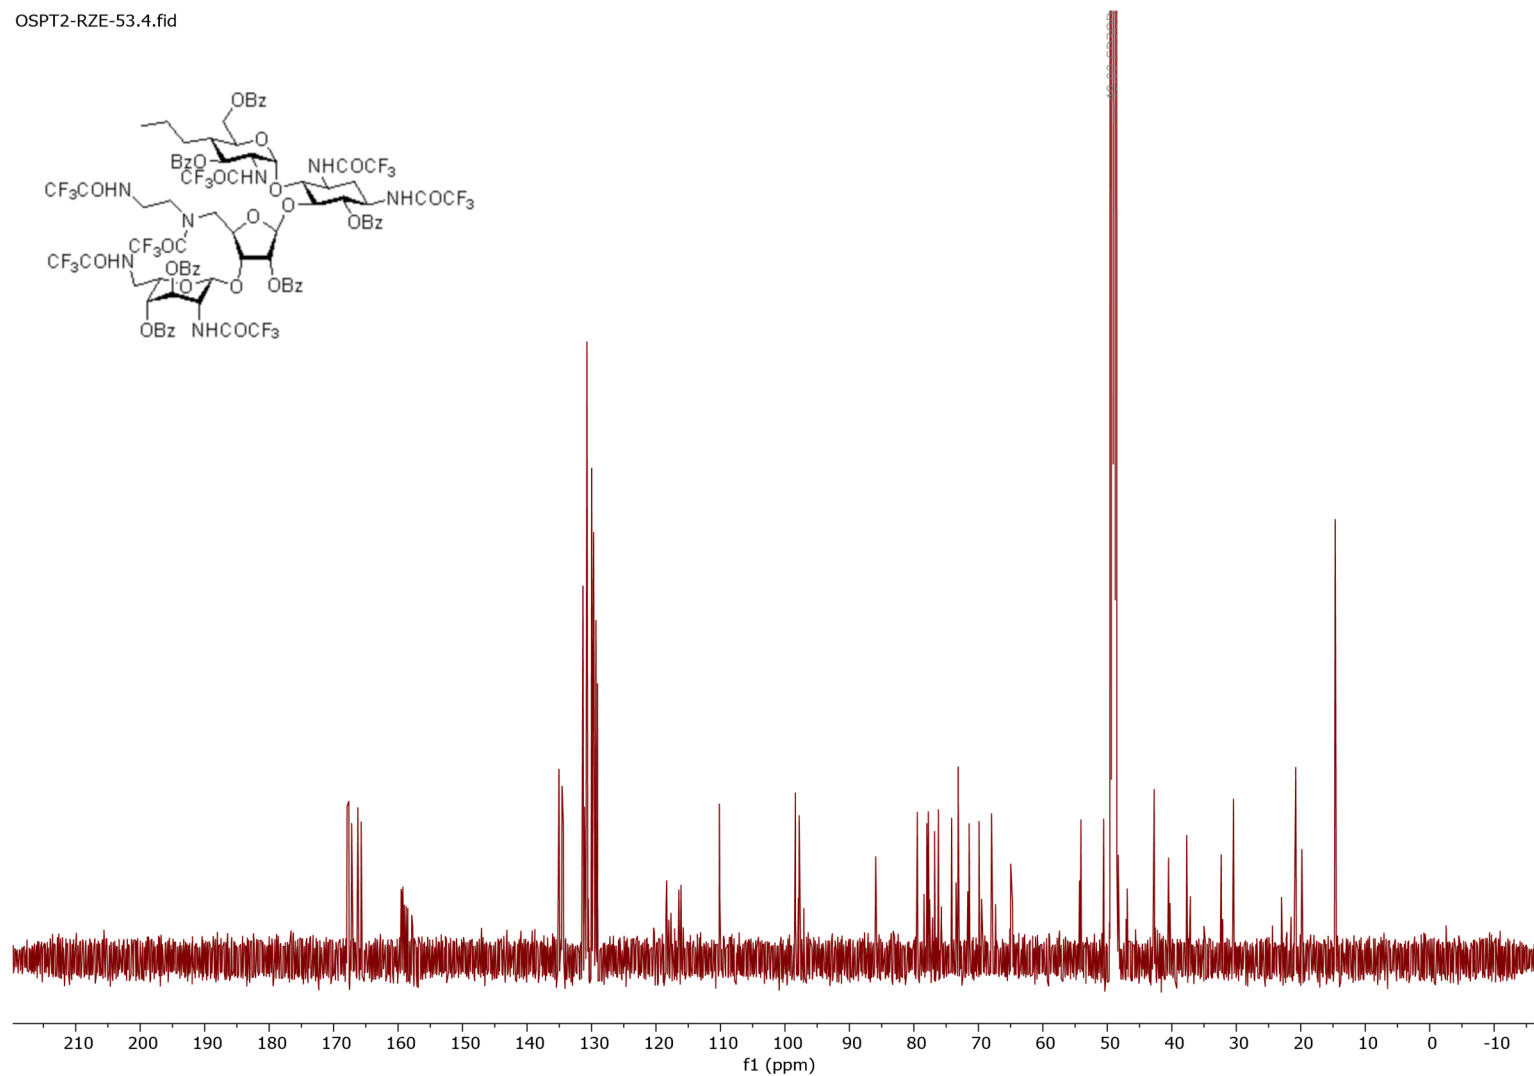

**4',5''-Dideoxy-4'-propyl-5''-(2-aminoethylamino)-1,2-ethanediamine)-6,3',6',2'',3''',4'''-hexa-*O*-benzoyl-hepta-*N*-trifluoroacetyl paromomycin (36)**

Latvijas Organiskās sintēzes institūts  
Fizikāli organiskās ķīmijas laboratorija

**MS: Waters Synapt G2-Si** Capillary, kV: 0.7    **LC: Acquity UPLC H-Class** Column: Acquity UPLC BEH C18  
**ESI+** Cone, V: 40    2.1x50mm, 1.7µm

**Sample:**

HRMS\_2019\_08\_460 1011 Zogota RZE-53  
MS\_POS\_500-2300\_RES\_7min ACN\_Form\_5-98\_040\_7min 1:F,1 10.000000 MS\_Tune Col#43

**Elemental Composition Report:**

Tolerance = 15.0 PPM / DBE: min = -1.5, max = 50.0  
Element prediction: Off  
Number of isotope peaks used for i-FIT = 3

Monoisotopic Mass, Even Electron Ions  
264 formula(e) evaluated with 2 results within limits (all results (up to 1000) for each mass)  
Elements Used:  
C: 0-84 H: 1-110 N: 1-10 O: 0-25 F: 21-21 Na: 1-1

| Mass      | RA     | Calc. Mass | mDa  | PPM | DBE  | i-FIT | Norm  | Conf(%) | Formula               |
|-----------|--------|------------|------|-----|------|-------|-------|---------|-----------------------|
| 2002.4412 | 100.00 | 2002.4409  | 0.3  | 0.1 | 40.5 | 486.5 | 0.273 | 76.11   | C83 H74 N9 O24 F21 Na |
|           |        | 2002.4297  | 11.5 | 5.7 | 40.5 | 487.6 | 1.432 | 23.89   | C84 H74 N7 O25 F21 Na |

**1011 Zogota RZE-53**

HRMS\_2019\_08\_460 1605 (4.490) Cm (1597:1619-1559:1577)

1: TOF MS ES+  
8.41e5

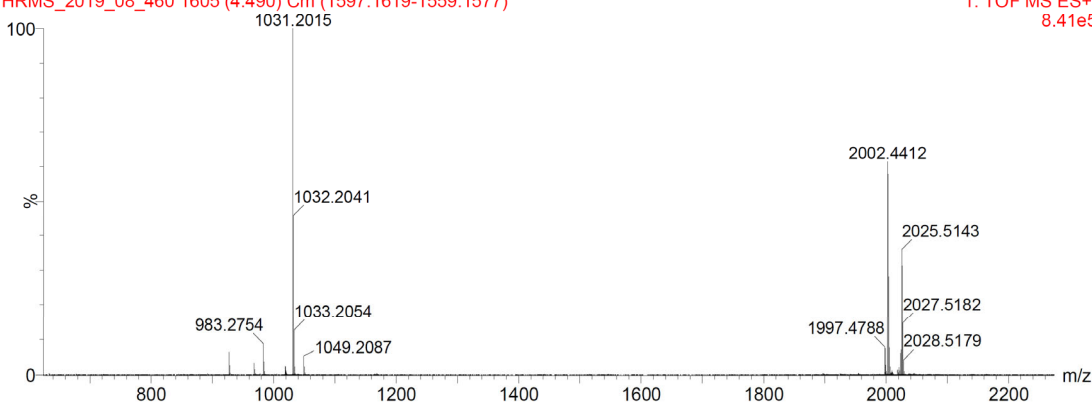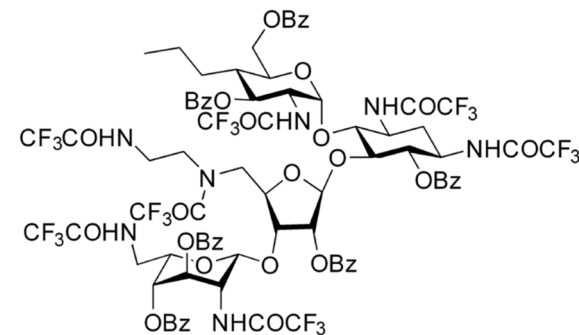

**4',5''-Dideoxy-4'-propyl-5''-(3-aminoethylamino)-1,3-diaminopropane)-6,3',6',2'',3''',4'''-hexa-O-benzoyl-hepta-N-trifluoroacetyl paromomycin (37)**

[<sup>1</sup>H-NMR, 600 MHz, CDCl<sub>3</sub>]

OSPT2-RZE-55.1.fid

— 7.26 CDCl<sub>3</sub>

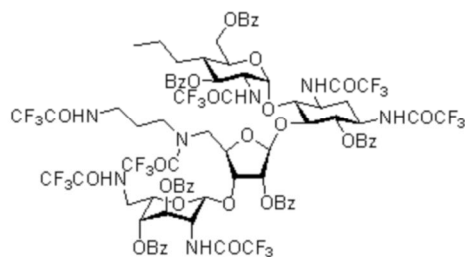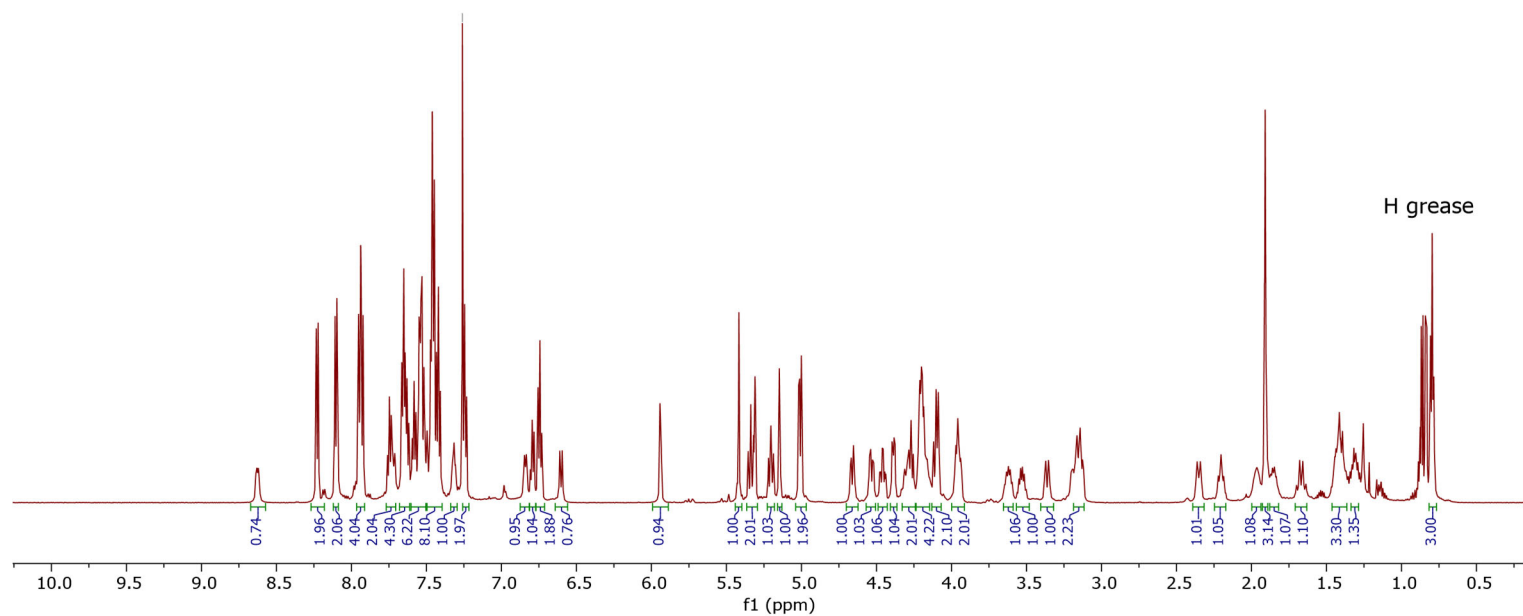

**4',5''-Dideoxy-4'-propyl-5''-(3-aminoethylamino)-1,3-diaminopropane)-6,3',6',2'',3''',4'''-hexa-O-benzoyl-hepta-N-trifluoroacetyl paromomycin (37)**

[<sup>13</sup>C-NMR, 150.9 MHz, CDCl<sub>3</sub>]

OSPT2-RZE-55.4.fid

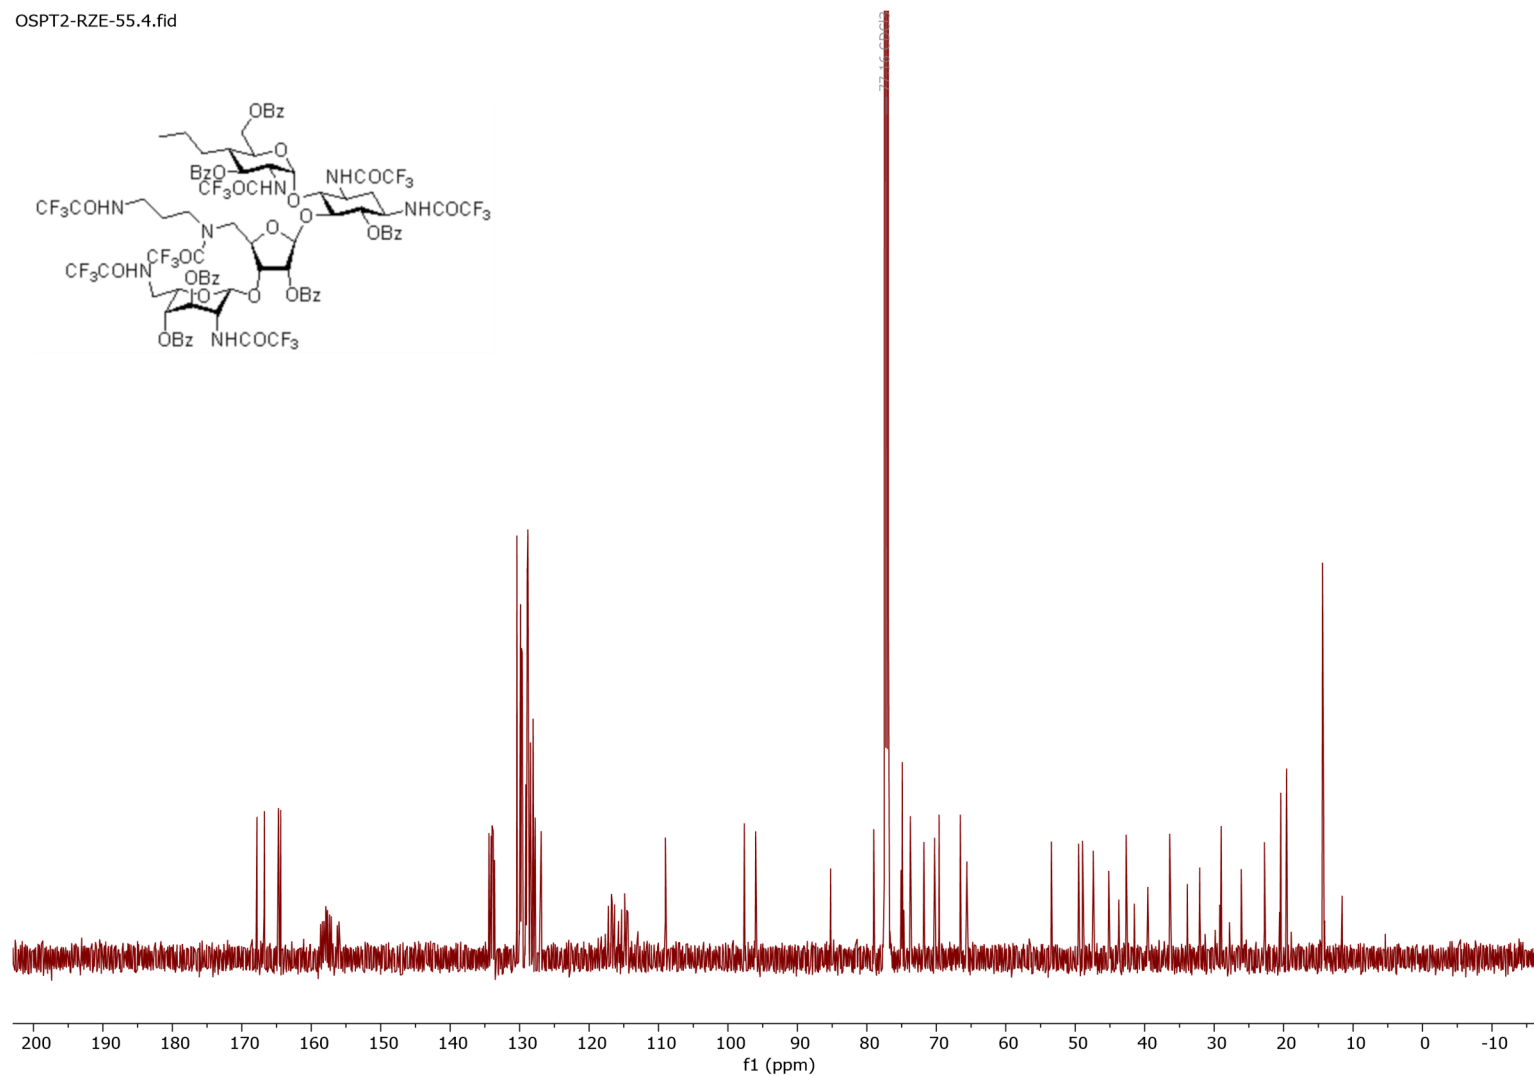

**4',5''-Dideoxy-4'-propyl-5''-(3-aminoethylamino)-1,3-diaminopropane)-6,3',6',2'',3''',4''''-hexa-O-benzoyl-hepta-N-trifluoroacetyl paromomycin (37)**

Latvijas Organiskās sintēzes institūts  
Fizikāli organiskās ķīmijas laboratorija

**MS: Waters Synapt G2-Si** Capillary, kV: 0.7 **LC: Acquity UPLC H-Class** Column: Acquity UPLC BEH C18  
**ESI+** Cone, V: 40 2.1x50mm, 1.7µm

**Sample:**

HRMS\_2020\_02\_160 1864 Zogota RZE-55

MS\_POS\_500-2300\_RES\_7min ACN\_Form\_5-98\_040\_7min 2:C,7 5.000000 MS\_Tune Col#43

**Elemental Composition Report:**

Multiple Mass Analysis: 2 mass(es) processed  
Tolerance = 5.0 PPM / DBE: min = -1.5, max = 50.0  
Element prediction: Off  
Number of isotope peaks used for i-FIT = 3

Monoisotopic Mass, Even Electron Ions  
17545 formula(e) evaluated with 8 results within limits (up to 3 best isotopic matches for each mass)  
Elements Used:  
C: 0-90 H: 0-80 N: 0-7 O: 0-25 F: 0-21 Na: 0-1

| Mass      | RA     | Calc. Mass | mDa  | PPM  | DBE  | i-FIT | Norm  | Conf(%) | Formula               |
|-----------|--------|------------|------|------|------|-------|-------|---------|-----------------------|
| 2016.4429 | 100.00 | 2016.4453  | -2.4 | -1.2 | 40.5 | 586.5 | 0.376 | 68.65   | C85 H76 N7 O25 F21 Na |
|           |        | 2016.4442  | -1.3 | -0.6 | 44.5 | 587.7 | 1.559 | 21.03   | C88 H75 N7 O24 F20 Na |
|           |        | 2016.4477  | -4.8 | -2.4 | 43.5 | 588.4 | 2.271 | 10.32   | C87 H75 N7 O25 F21    |
| 2017.4457 | 93.39  | 2017.4446  | 1.1  | 0.5  | 44.5 | 607.3 | 0.103 | 90.22   | C89 H75 N6 O23 F21 Na |
|           |        | 2017.4533  | -7.6 | -3.8 | 43.5 | 609.5 | 2.325 | 9.78    | C90 H78 N4 O25 F20 Na |

**1864 Zogota RZE-55**

HRMS\_2020\_02\_160 1718 (4.804) Cm (1715:1744-(1592:1620+1864:1884))

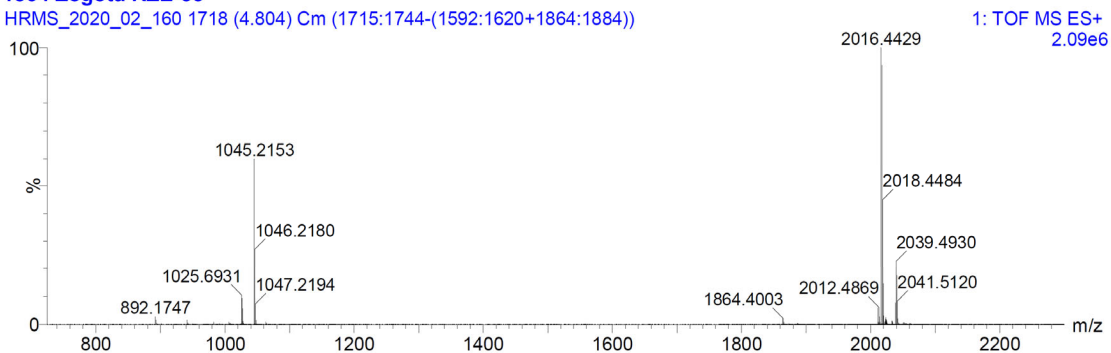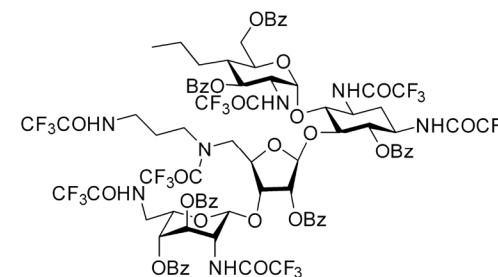

**4',5''-Dideoxy-4'-propyl-5''-(*O*-benzylcarbamoyl)-6,3',6',2'',3''',4'''-hexa-*O*-benzoyl-1,3,2',2''',6'''-penta-*N*-trifluoroacetyl paromomycin (38)**

[<sup>1</sup>H-NMR, 600 MHz, CDCl<sub>3</sub>]

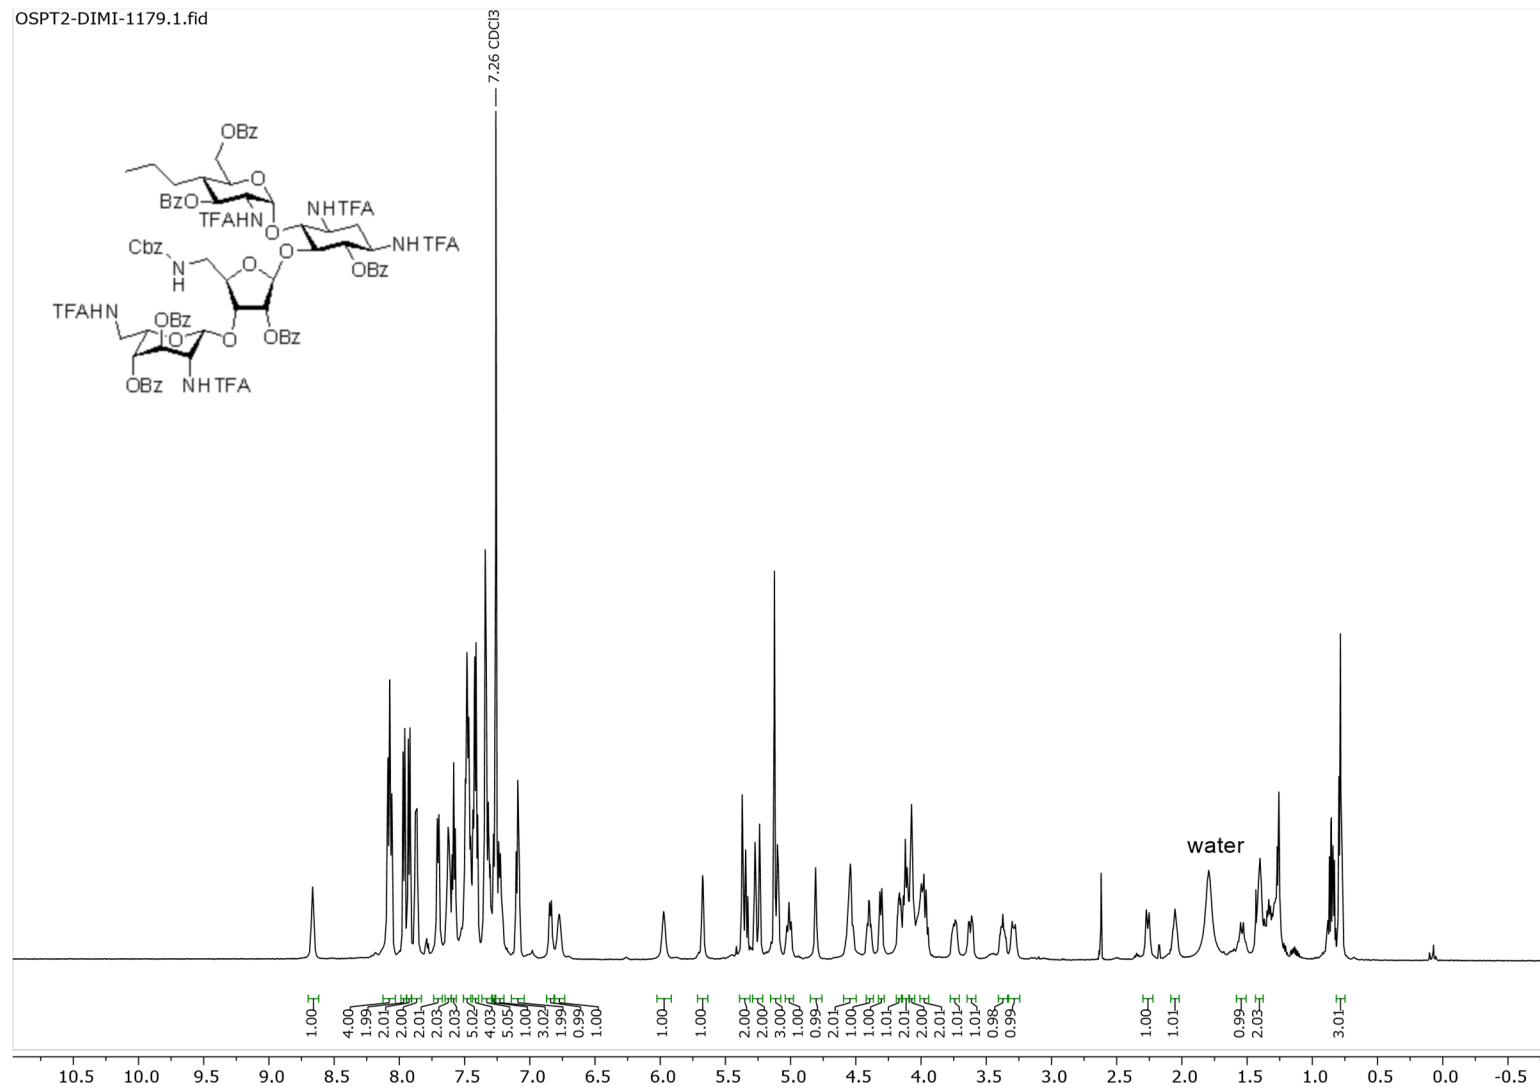





**4',5''-Dideoxy-4'-propyl-5''-(*O*-benzylcarbamoyl)-6,3',6',2'',3''',4'''-hexa-*O*-benzoyl-1,3,2',2''',6'''-penta-*N*-trifluoroacetyl paromomycin (38)**

[<sup>1</sup>H, <sup>13</sup>C HSQC, 600 MHz, 150.9 MHz, CDCl<sub>3</sub>]

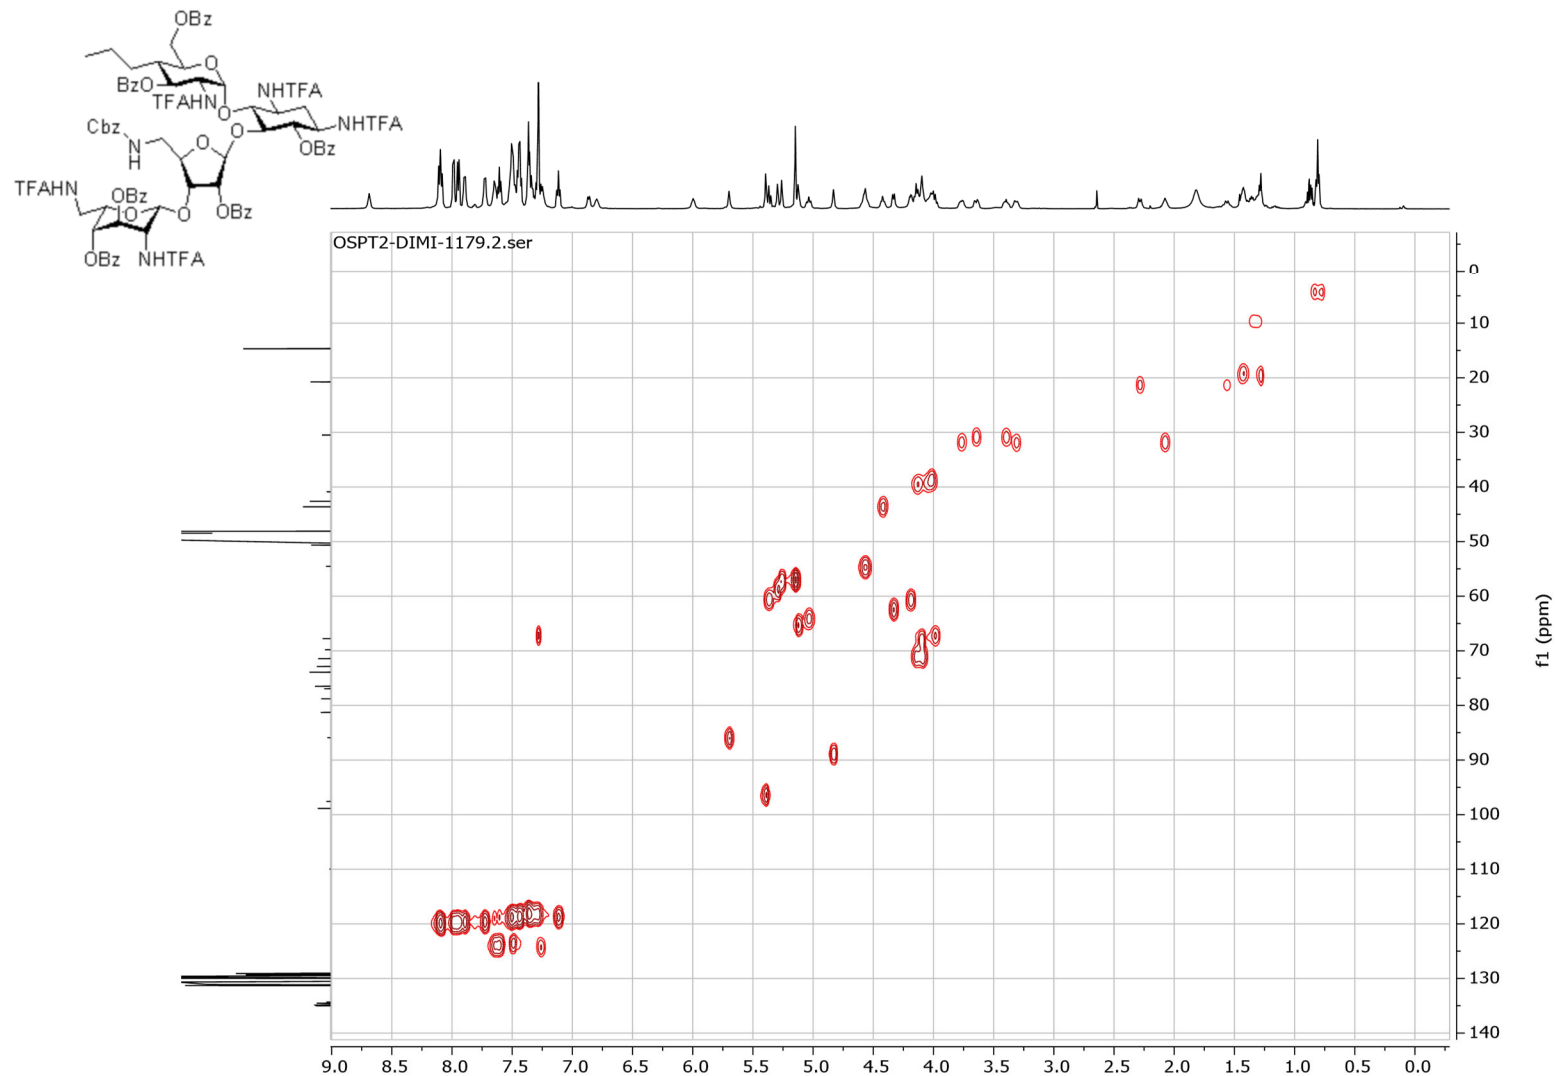

**4',5''-Dideoxy-4'-propyl-5''-(*O*-benzylcarbamoyl)-6,3',6',2'',3''',4'''-hexa-*O*-benzoyl-1,3,2',2''',6'''-penta-*N*-trifluoroacetyl paromomycin (38)**

[<sup>1</sup>H, <sup>13</sup>C HMBC, 600 MHz, 150.9 MHz, CDCl<sub>3</sub>]

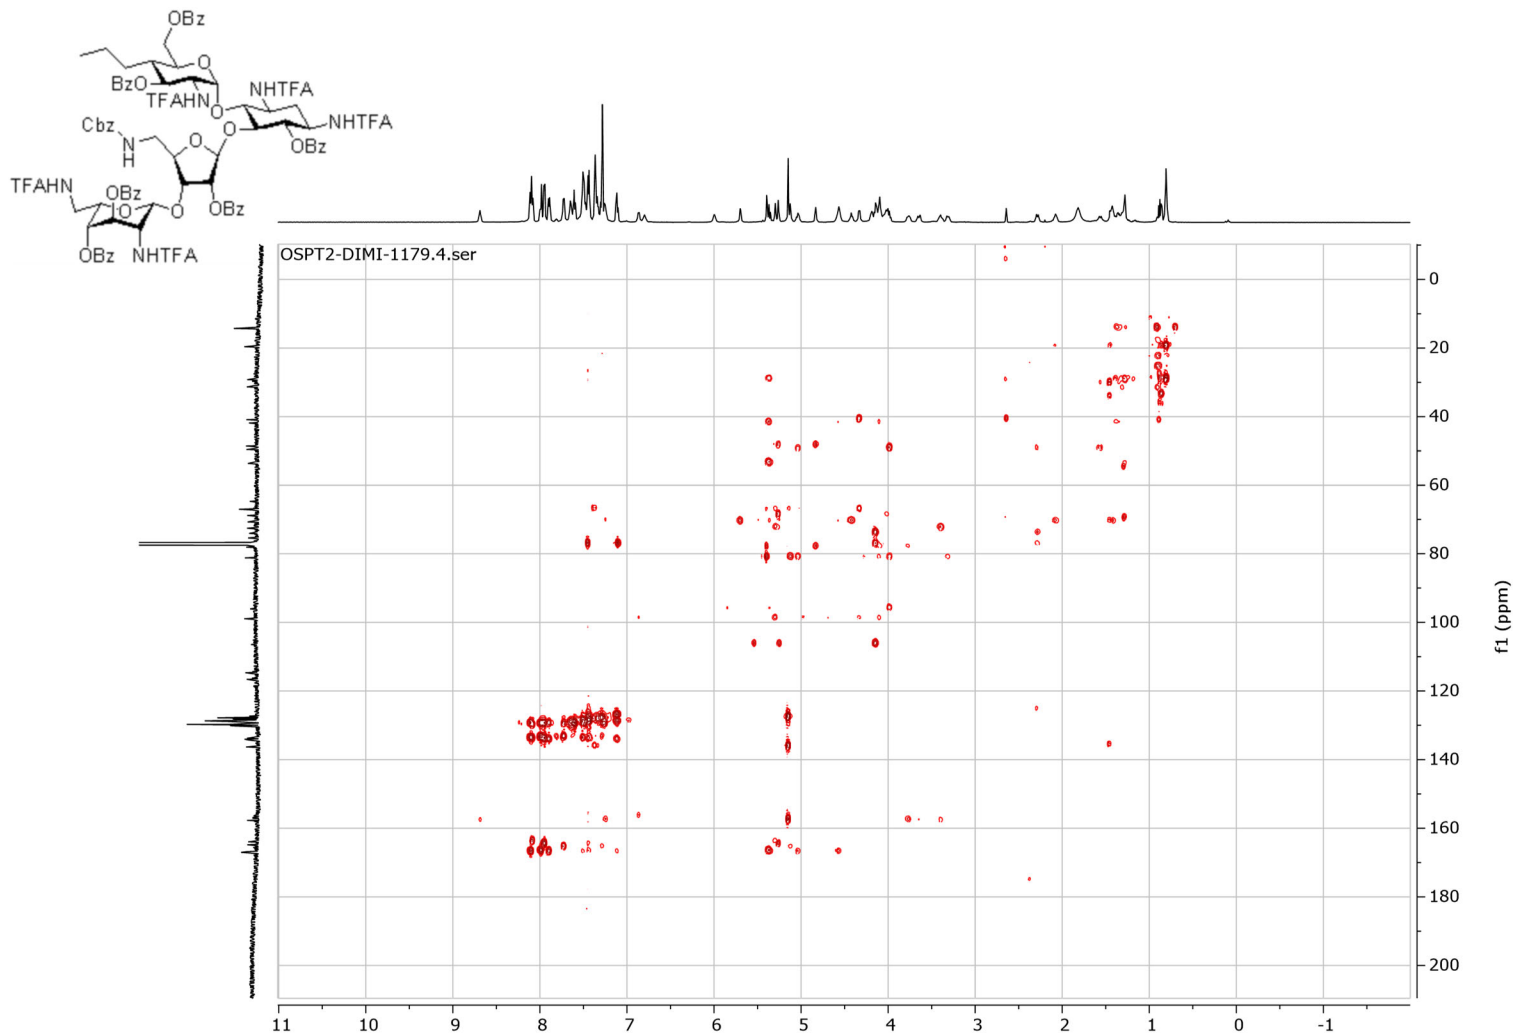

**4',5''-Dideoxy-4'-propyl-5''-(*O*-benzylcarbamoyl)-6,3',6',2'',3''',4'''-hexa-*O*-benzoyl-1,3,2',2''',6'''-penta-*N*-trifluoroacetyl paromomycin (38)**

[<sup>1</sup>H, <sup>1</sup>H ROESY, 600 MHz, CDCl<sub>3</sub>]

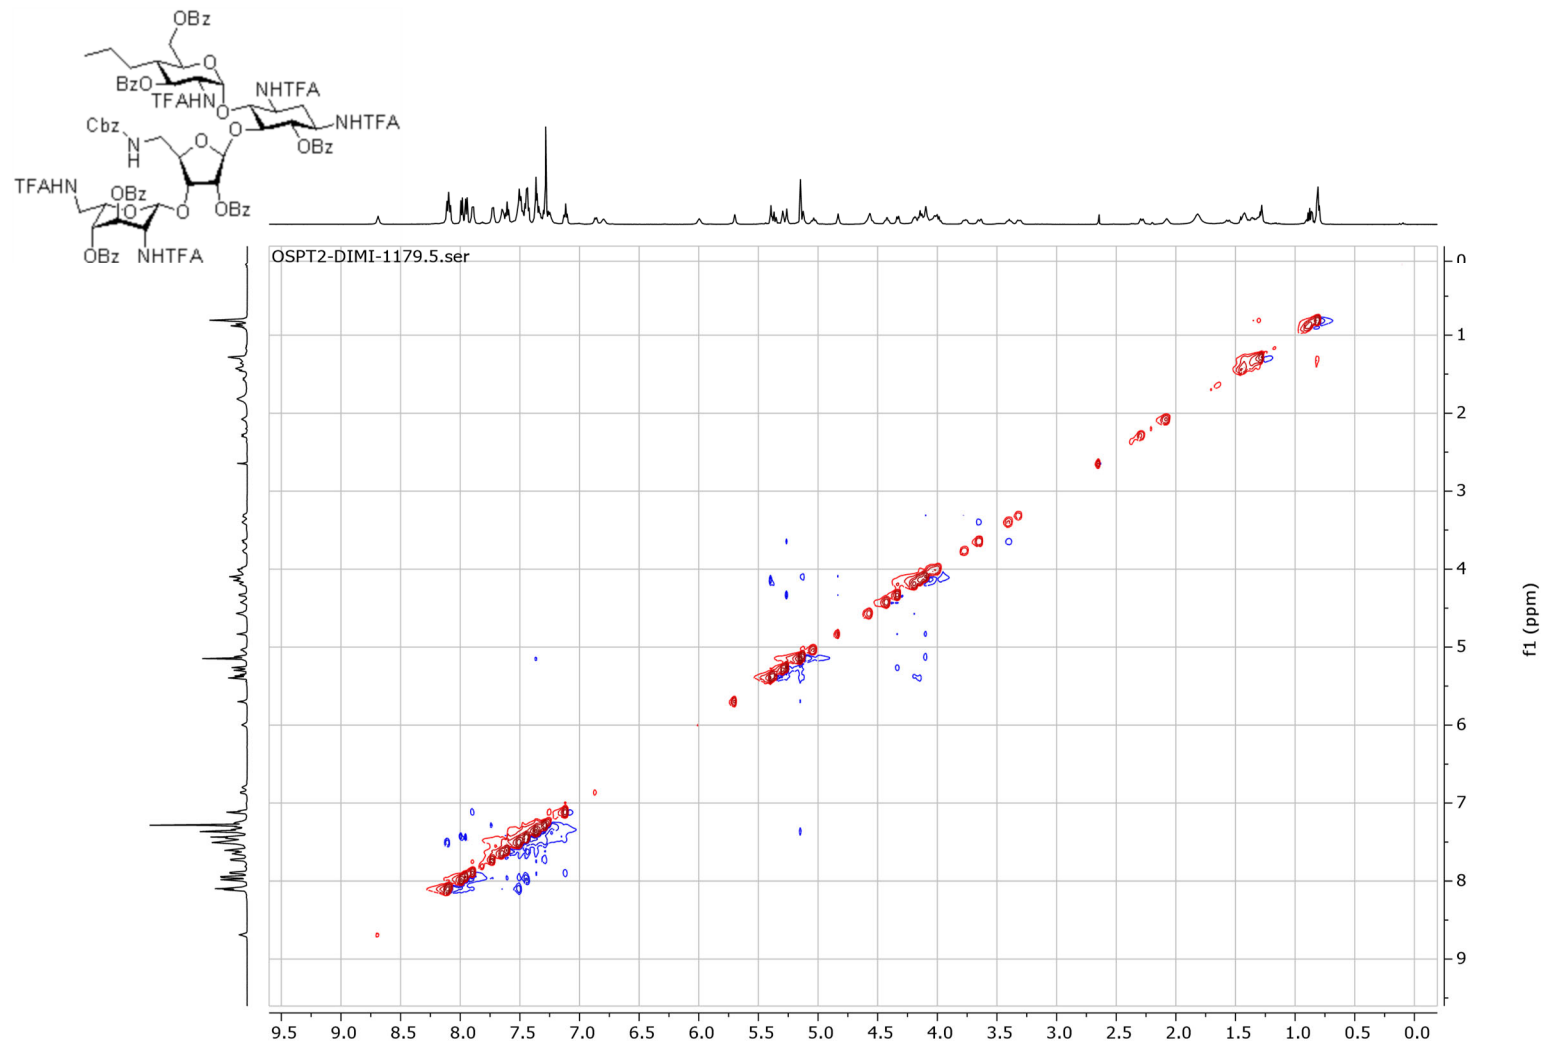

**4',5''-Dideoxy-4'-propyl-5''-(*O*-benzylcarbamoyl)-6,3',6',2'',3''',4''''-hexa-*O*-benzoyl-1,3,2',2''',6''''-penta-*N*-trifluoroacetyl paromomycin (38)**

Latvijas Organiskās sintēzes institūts  
Fizikāli organiskās ķīmijas laboratorija

**MS: Waters Synapt G2-Si** Capillary, kV: 0.7      **LC: Acquity UPLC H-Class** Column: Acquity UPLC BEH C18  
**ESI+** Cone, V: 40      2.1x50mm, 1.7µm

**Sample:**

HRMS\_2020\_10\_384 3166 Lubriks DIMI-1388  
MS\_POS\_500-2000\_RES\_7min ACN\_Form\_5-98\_040\_7min 1:E,6 1.000000 MS\_Tune Col#66

**Elemental Composition Report:**

Tolerance = 5.0 PPM / DBE: min = -1.5, max = 50.0  
Element prediction: Off  
Number of isotope peaks used for i-FIT = 7

Monoisotopic Mass, Even Electron Ions  
2256 formula(e) evaluated with 15 results within limits (up to 5 closest results for each mass)  
Elements Used:  
C: 0-100 H: 0-100 N: 0-15 O: 0-30 F: 15-15 Na: 1-1

| Mass      | RA     | Calc. Mass | mDa  | PPM  | DBE  | i-FIT  | Norm  | Conf(%) | Formula                |
|-----------|--------|------------|------|------|------|--------|-------|---------|------------------------|
| 1901.4622 | 100.00 | 1901.4623  | -0.1 | -0.1 | 42.5 | 1624.2 | 6.156 | 0.21    | C90 H81 O27 F15 Na     |
|           |        | 1901.4628  | -0.6 | -0.3 | 35.5 | 1618.1 | 0.031 | 96.92   | C75 H77 N12 O28 F15 Na |
|           |        | 1901.4610  | 1.2  | 0.6  | 48.5 | 1622.4 | 4.359 | 1.28    | C87 H73 N10 O21 F15 Na |
|           |        | 1901.4637  | -1.5 | -0.8 | 47.5 | 1624.3 | 6.260 | 0.19    | C91 H77 N4 O23 F15 Na  |
|           |        | 1901.4597  | 2.5  | 1.3  | 43.5 | 1622.3 | 4.274 | 1.39    | C86 H77 N6 O25 F15 Na  |

**3166 Lubriks DIMI-1388**

HRMS\_2020\_10\_384 1708 (4.778) Cm (1707:1721-(1660:1674+1770:1783))

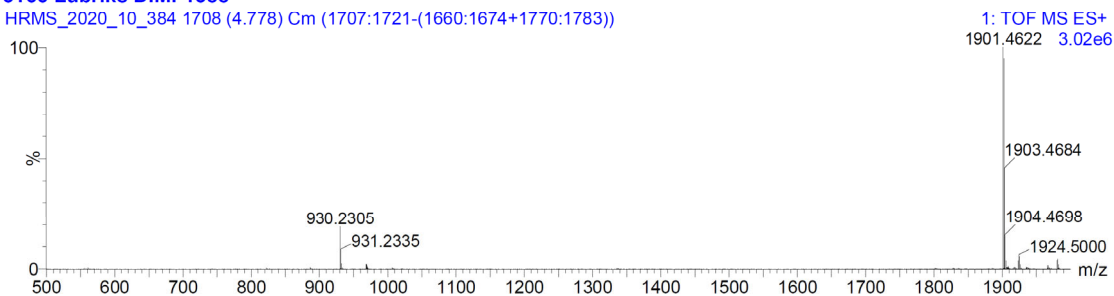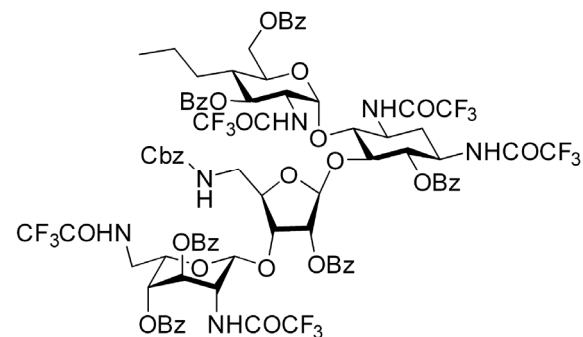

**4',5''-Dideoxy-4'-propyl-5''-formamido-6,3',6',2'',3''',4''''-hexa-O-benzoyl-1,3,2',2''',6''''-penta-N-trifluoroacetyl paromomycin (39)**

[<sup>1</sup>H-NMR, 600 MHz, CDCl<sub>3</sub>]

OSPT2-DIMI-1389.1.fid

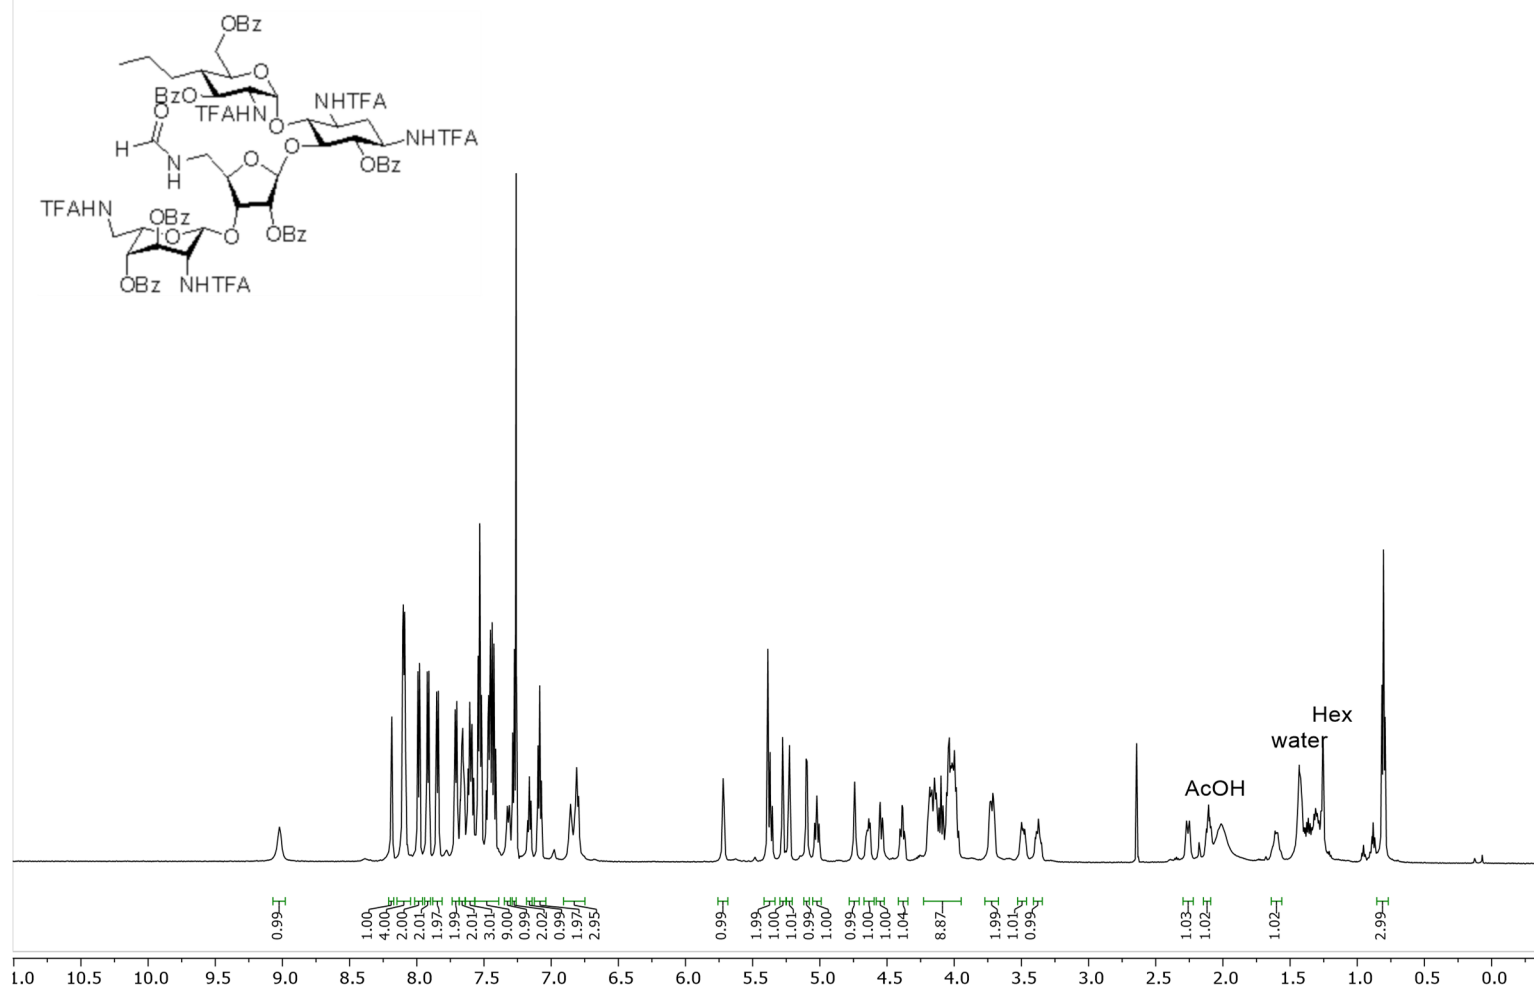

**4',5''-Dideoxy-4'-propyl-5''-formamido-6,3',6',2'',3''',4'''-hexa-O-benzoyl-1,3,2',2''',6'''-penta-N-trifluoroacetyl paromomycin (39)**

[<sup>13</sup>C-NMR, 150.9 MHz, CDCl<sub>3</sub>]

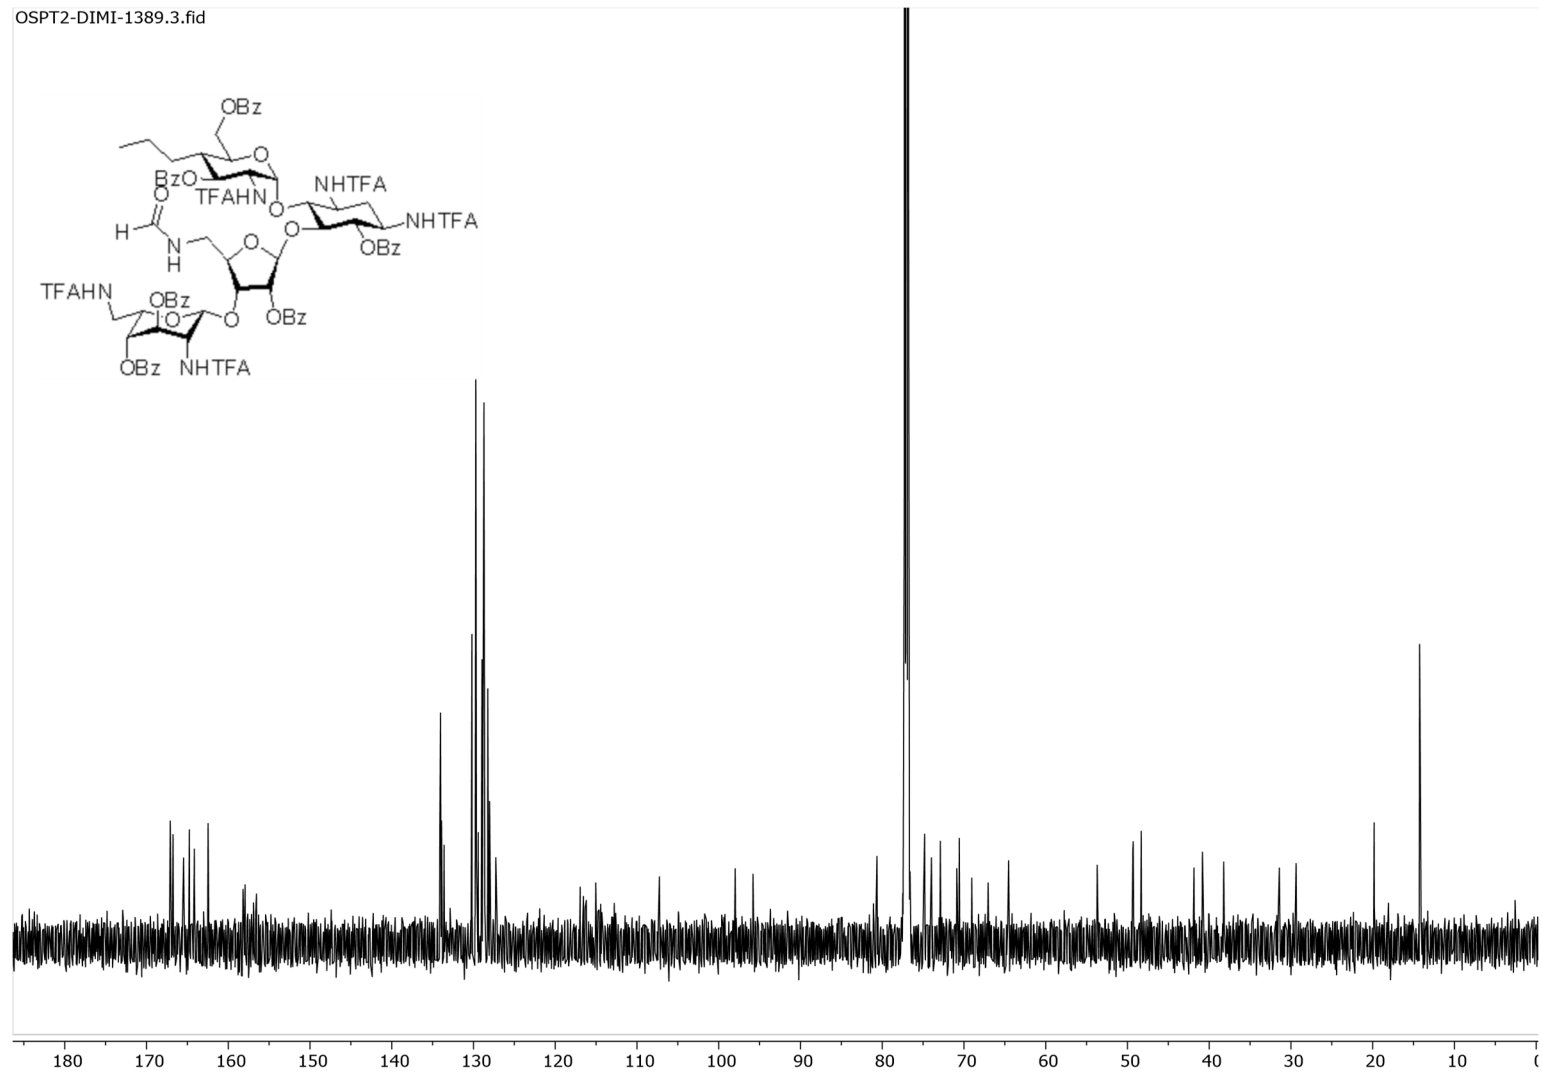

**4',5''-Dideoxy-4'-propyl-5''-formamido-6,3',6',2'',3''',4''-hexa-O-benzoyl-1,3,2',2''',6''-penta-N-trifluoroacetyl paromomycin (39)**

[<sup>1</sup>H, <sup>13</sup>C HSQC, 600 MHz, 150.9 MHz, CDCl<sub>3</sub>]

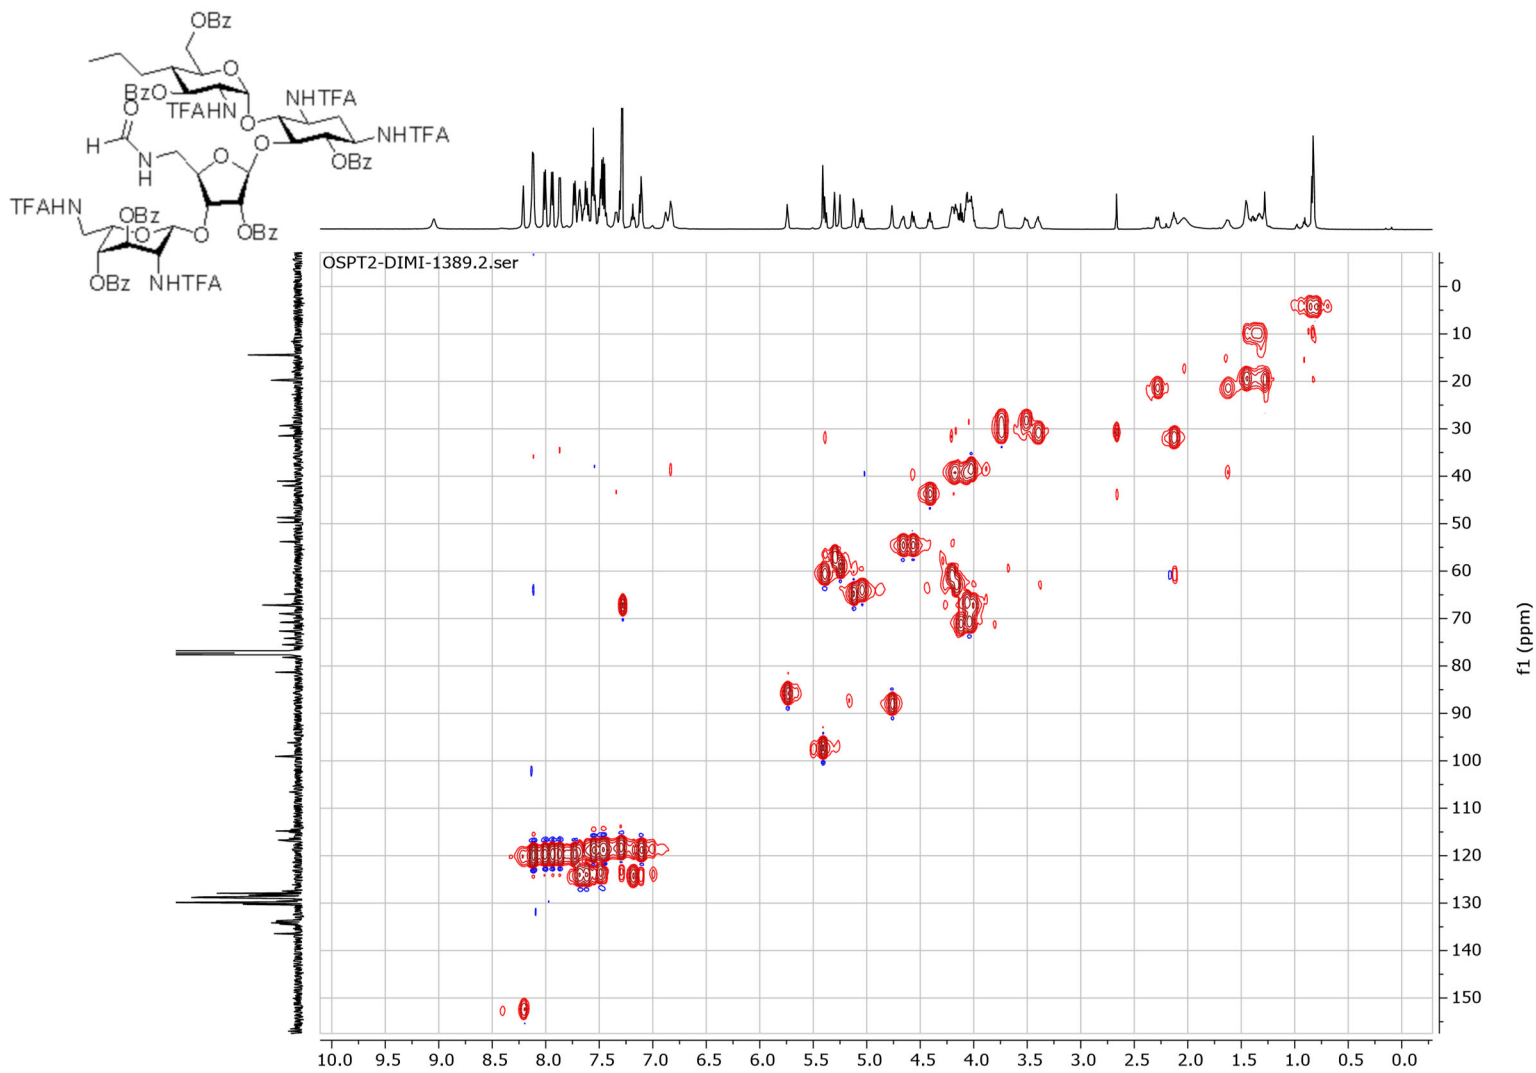



**4',5''-Dideoxy-4'-propyl-5''-formamido-6,3',6',2'',3''',4''''-hexa-O-benzoyl-1,3,2',2''',6''''-penta-N-trifluoroacetyl paromomycin (39)**

[<sup>1</sup>H, <sup>13</sup>C HMBC, 600 MHz, 150.9 MHz, CDCl<sub>3</sub>]

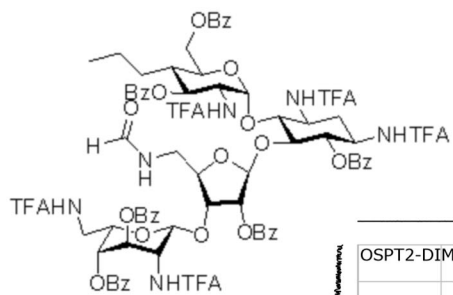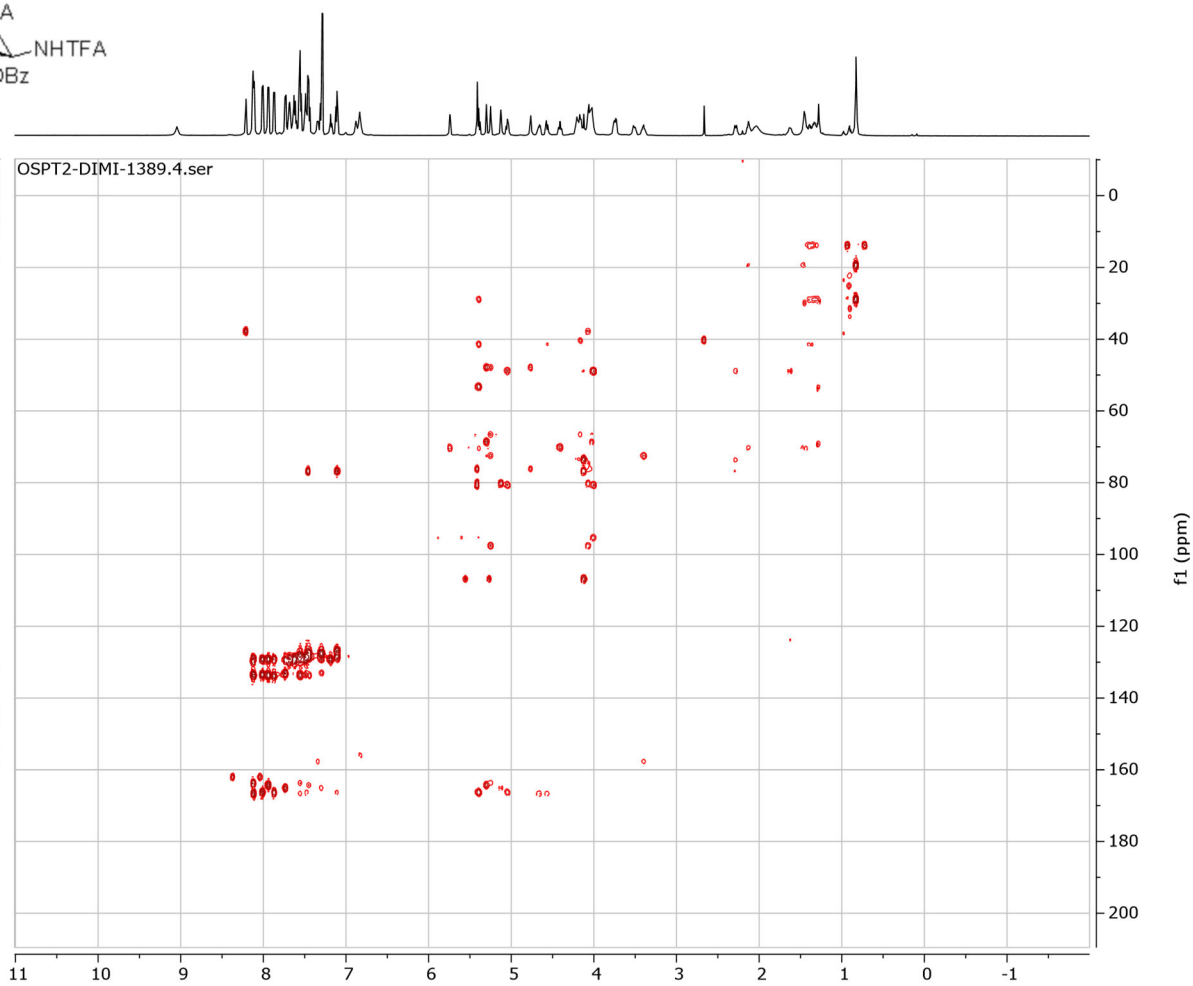

**4',5''-Dideoxy-4'-propyl-5''-formamido-6,3',6',2'',3''',4''''-hexa-O-benzoyl-1,3,2',2''',6''''-penta-N-trifluoroacetyl paromomycin (39)**

[<sup>1</sup>H, <sup>1</sup>H ROESY, 600 MHz, CDCl<sub>3</sub>]

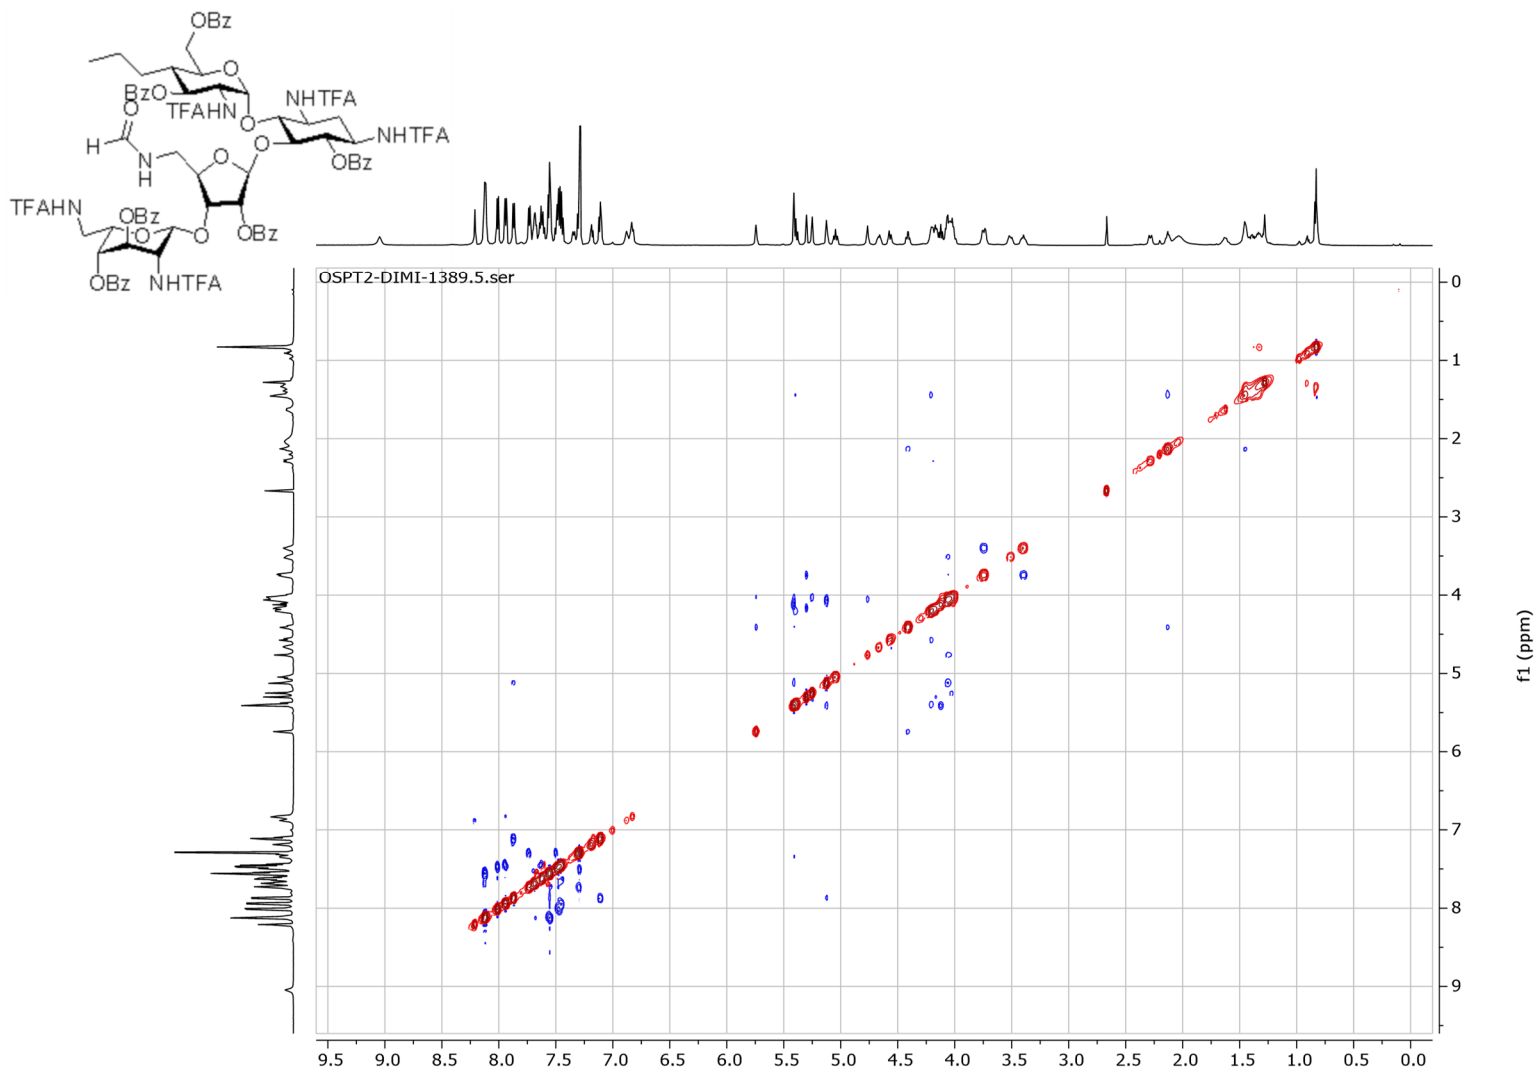

## 4',5''-Dideoxy-4'-propyl-5''-formamido-6,3',6',2'',3''',4''-hexa-O-benzoyl-1,3,2',2''',6''-penta-N-trifluoroacetyl paromomycin (39)

Latvijas Organiskās sintēzes institūts  
Fizikāli organiskās ķīmijas laboratorija

**MS: Waters Synapt G2-Si** Capillary, kV: 0.7 **LC: Acquity UPLC H-Class** Column: Acquity UPLC BEH C18  
**ESI+** Cone, V: 40 2.1x50mm, 1.7µm

### Sample:

HRMS\_2020\_10\_386 3167 Lubriks DIMI-1389

MS\_POS\_500-2000\_RES\_7min ACN\_Form\_5-98\_040\_7min 1:E,7 1.000000 MS\_Tune Col#66

### Elemental Composition Report:

Tolerance = 5.0 PPM / DBE: min = -1.5, max = 50.0

Element prediction: Off

Number of isotope peaks used for i-FIT = 7

Monoisotopic Mass, Even Electron Ions

3130 formula(e) evaluated with 21 results within limits (up to 5 closest results for each mass)

Elements Used:

C: 0-100 H: 0-100 N: 0-15 O: 0-30 F: 15-15

| Mass      | RA     | Calc. Mass | mDa  | PPM  | DBE  | i-FIT  | Norm  | Conf(%) | Formula             |
|-----------|--------|------------|------|------|------|--------|-------|---------|---------------------|
| 1773.4353 | 100.00 | 1773.4350  | 0.3  | 0.2  | 27.5 | 1282.4 | 0.317 | 72.80   | C63 H72 N14 O29 F15 |
|           |        | 1773.4358  | -0.5 | -0.3 | 39.5 | 1285.1 | 2.957 | 5.20    | C79 H72 N6 O24 F15  |
|           |        | 1773.4345  | 0.8  | 0.5  | 34.5 | 1284.9 | 2.823 | 5.94    | C78 H76 N2 O28 F15  |
|           |        | 1773.4372  | -1.9 | -1.1 | 44.5 | 1285.2 | 3.107 | 4.48    | C80 H68 N10 O20 F15 |
|           |        | 1773.4332  | 2.1  | 1.2  | 40.5 | 1284.3 | 2.155 | 11.59   | C75 H68 N12 O22 F15 |

### 3167 Lubriks DIMI-1389

HRMS\_2020\_10\_386 1612 (4.509) Cm (1603:1627-(1569:1585+1655:1679))

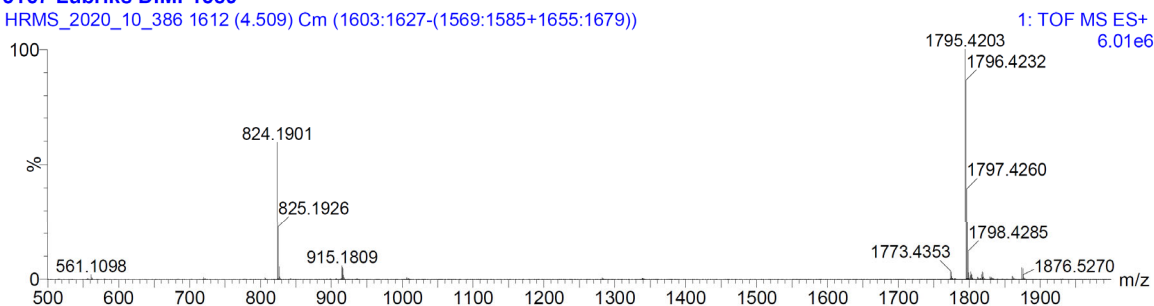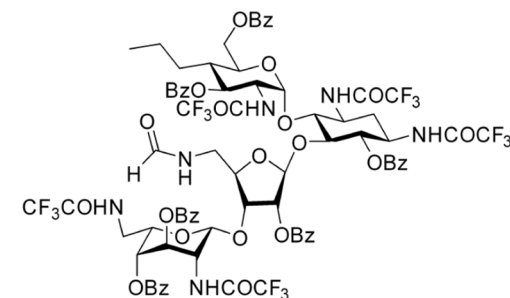

**4',5''-Dideoxy-4'-propyl-5''-(*N*-benzylureido)-6,3',6',2'',3''',4'''-hexa-*O*-benzoyl-1,3,2',2''',6'''-penta-*N*-trifluoroacetyl paromomycin (40)**

[<sup>1</sup>H-NMR, 600 MHz, CDCl<sub>3</sub>]

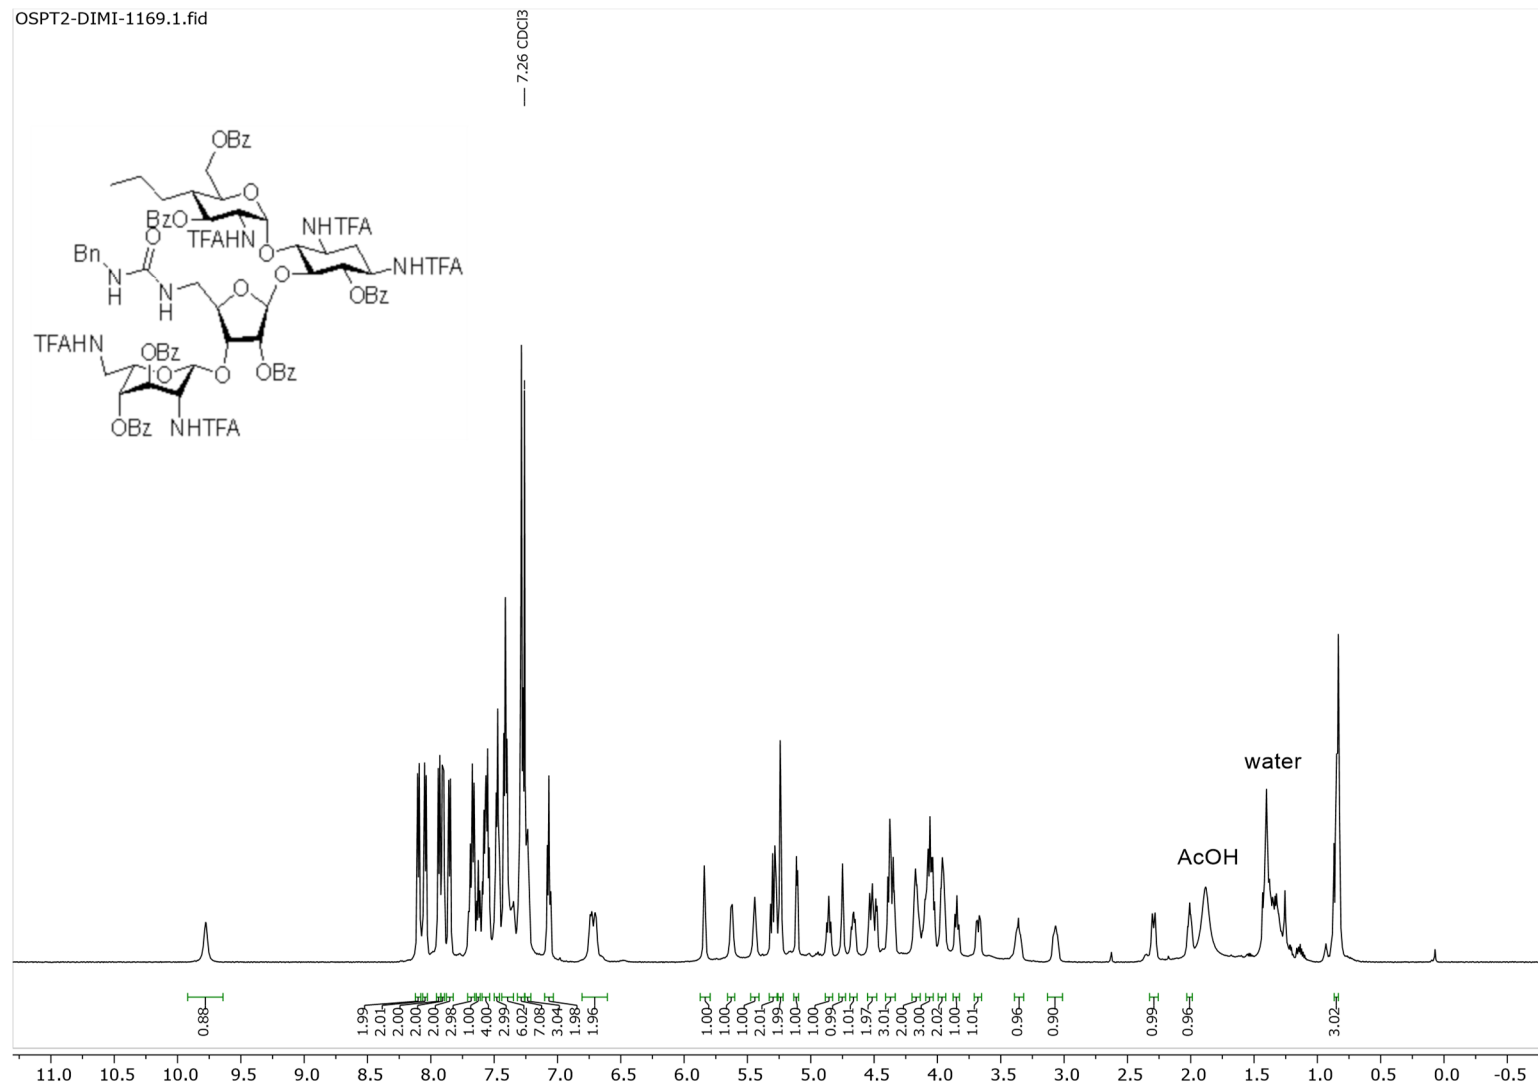

**4',5''-Dideoxy-4'-propyl-5''-(*N*-benzylureido)-6,3',6',2'',3''',4'''-hexa-*O*-benzoyl-1,3,2',2''',6'''-penta-*N*-trifluoroacetyl paromomycin (40)**

[<sup>13</sup>C-NMR, 150.9 MHz, CDCl<sub>3</sub>]

OSPT2-DIMI-1169.3.fid

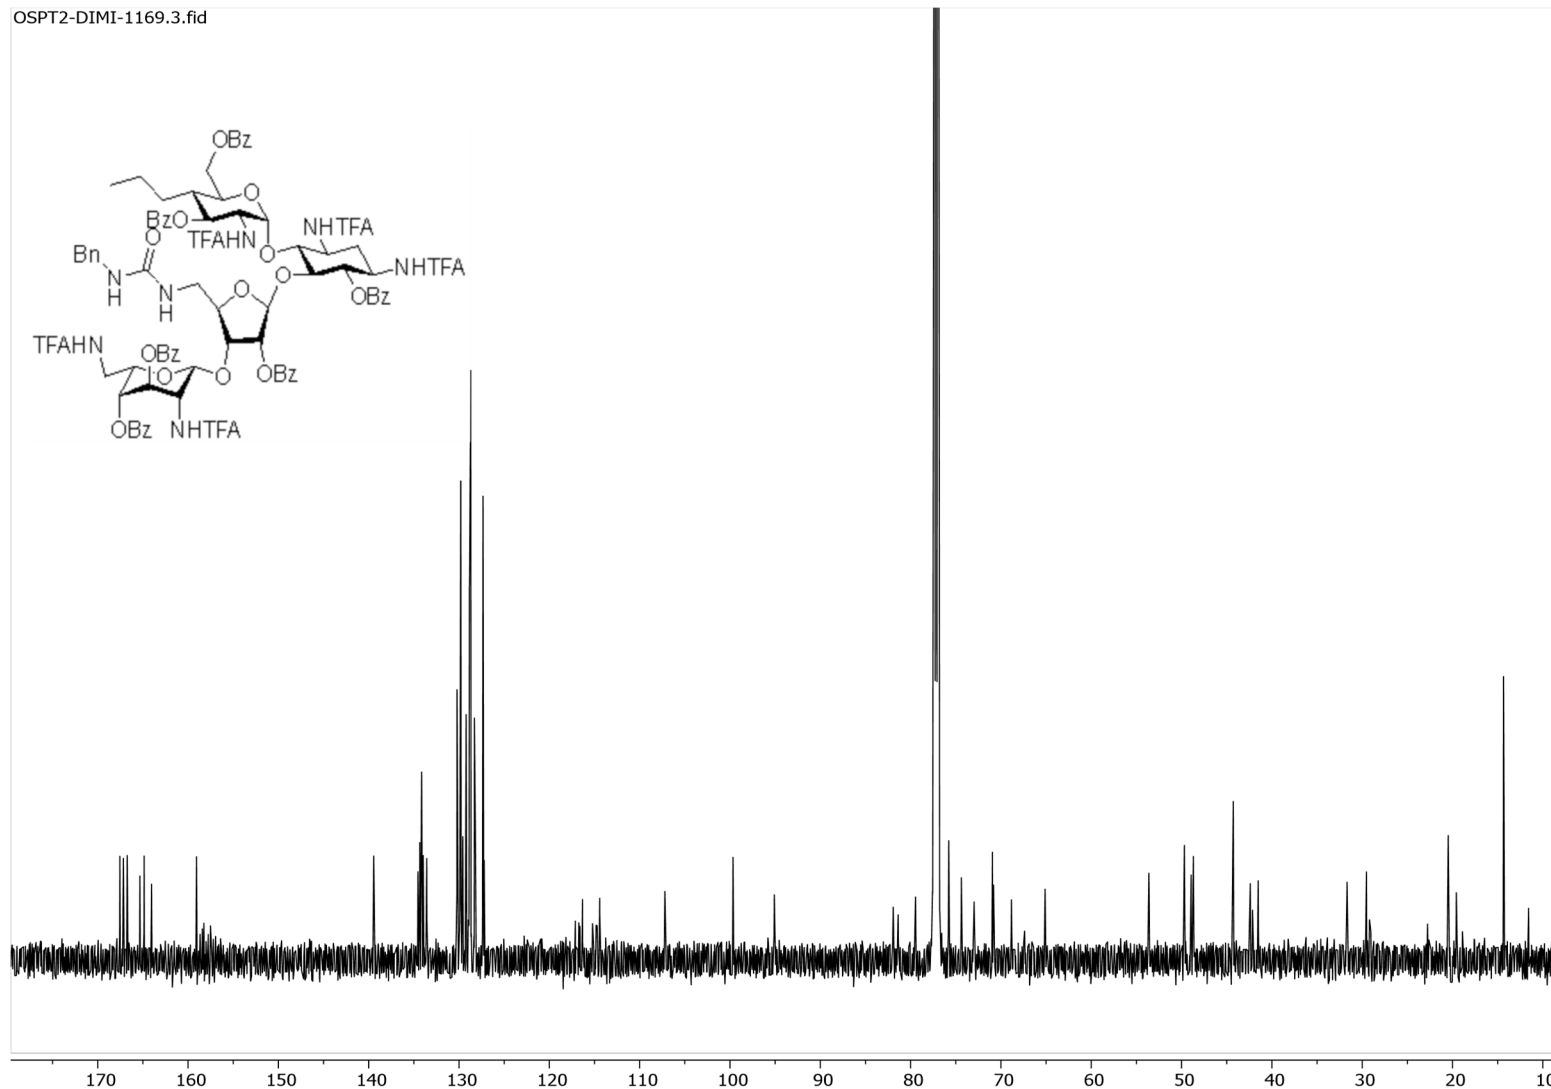

**4',5''-Dideoxy-4'-propyl-5''-(*N*-benzylureido)-6,3',6',2'',3''',4'''-hexa-*O*-benzoyl-1,3,2',2''',6'''-penta-*N*-trifluoroacetyl paromomycin (40)**

[<sup>1</sup>H, <sup>13</sup>C HSQC, 600 MHz, 150.9 MHz, CDCl<sub>3</sub>]

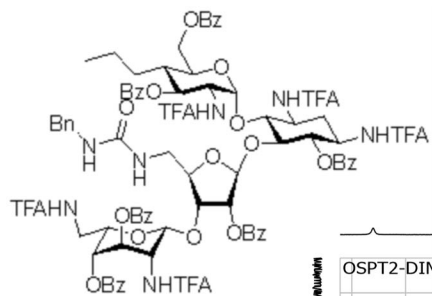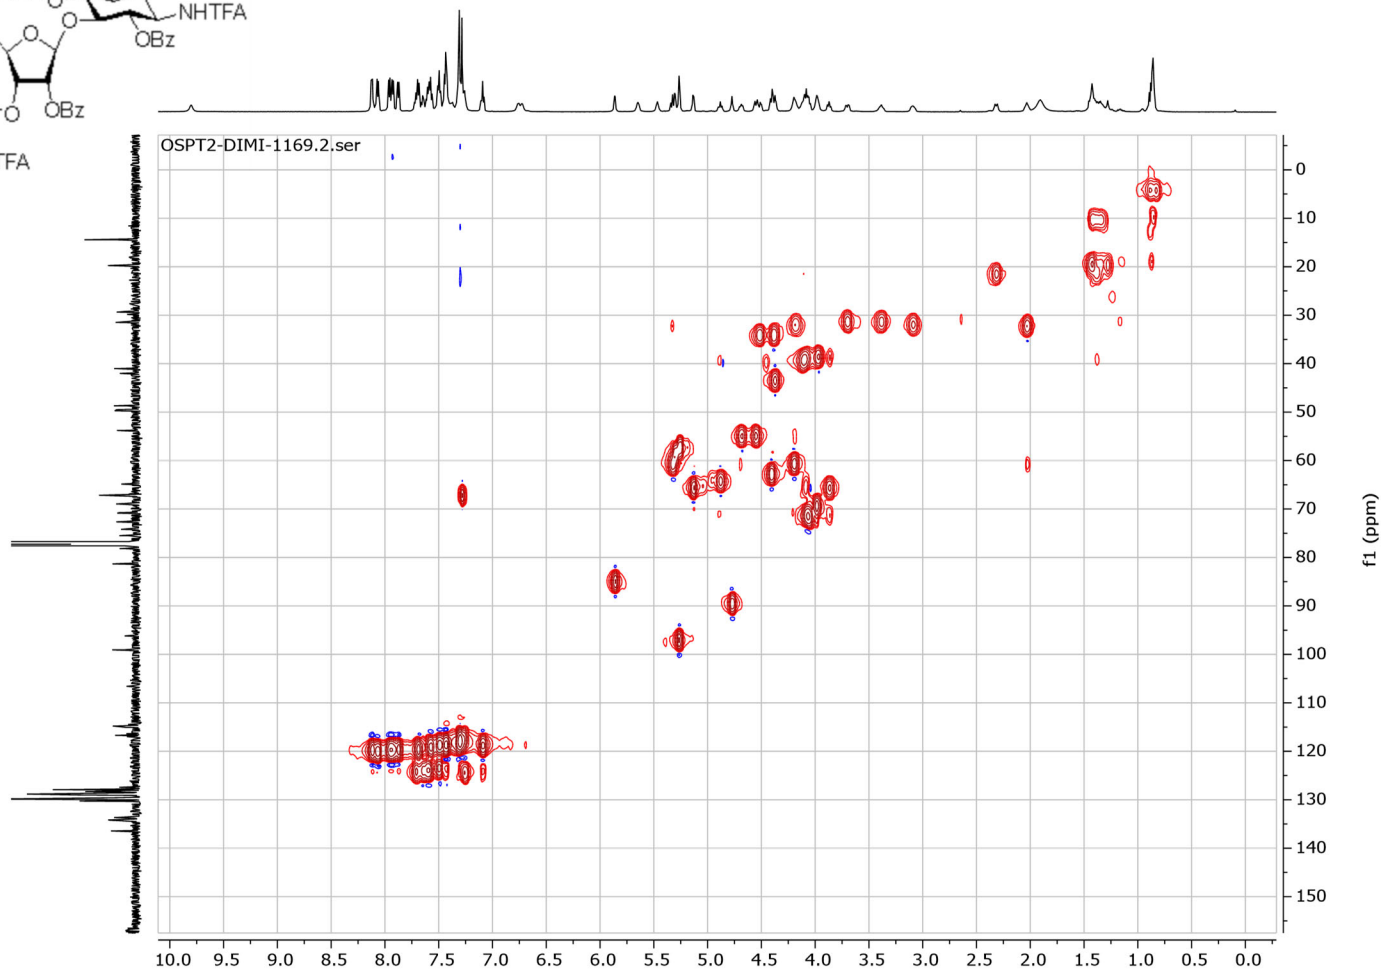

**4',5''-Dideoxy-4'-propyl-5''-(*N*-benzylureido)-6,3',6',2'',3''',4'''-hexa-*O*-benzoyl-1,3,2',2''',6'''-penta-*N*-trifluoroacetyl paromomycin (40)**

[<sup>1</sup>H, <sup>13</sup>C HMBC, 600 MHz, 150.9 MHz, CDCl<sub>3</sub>]

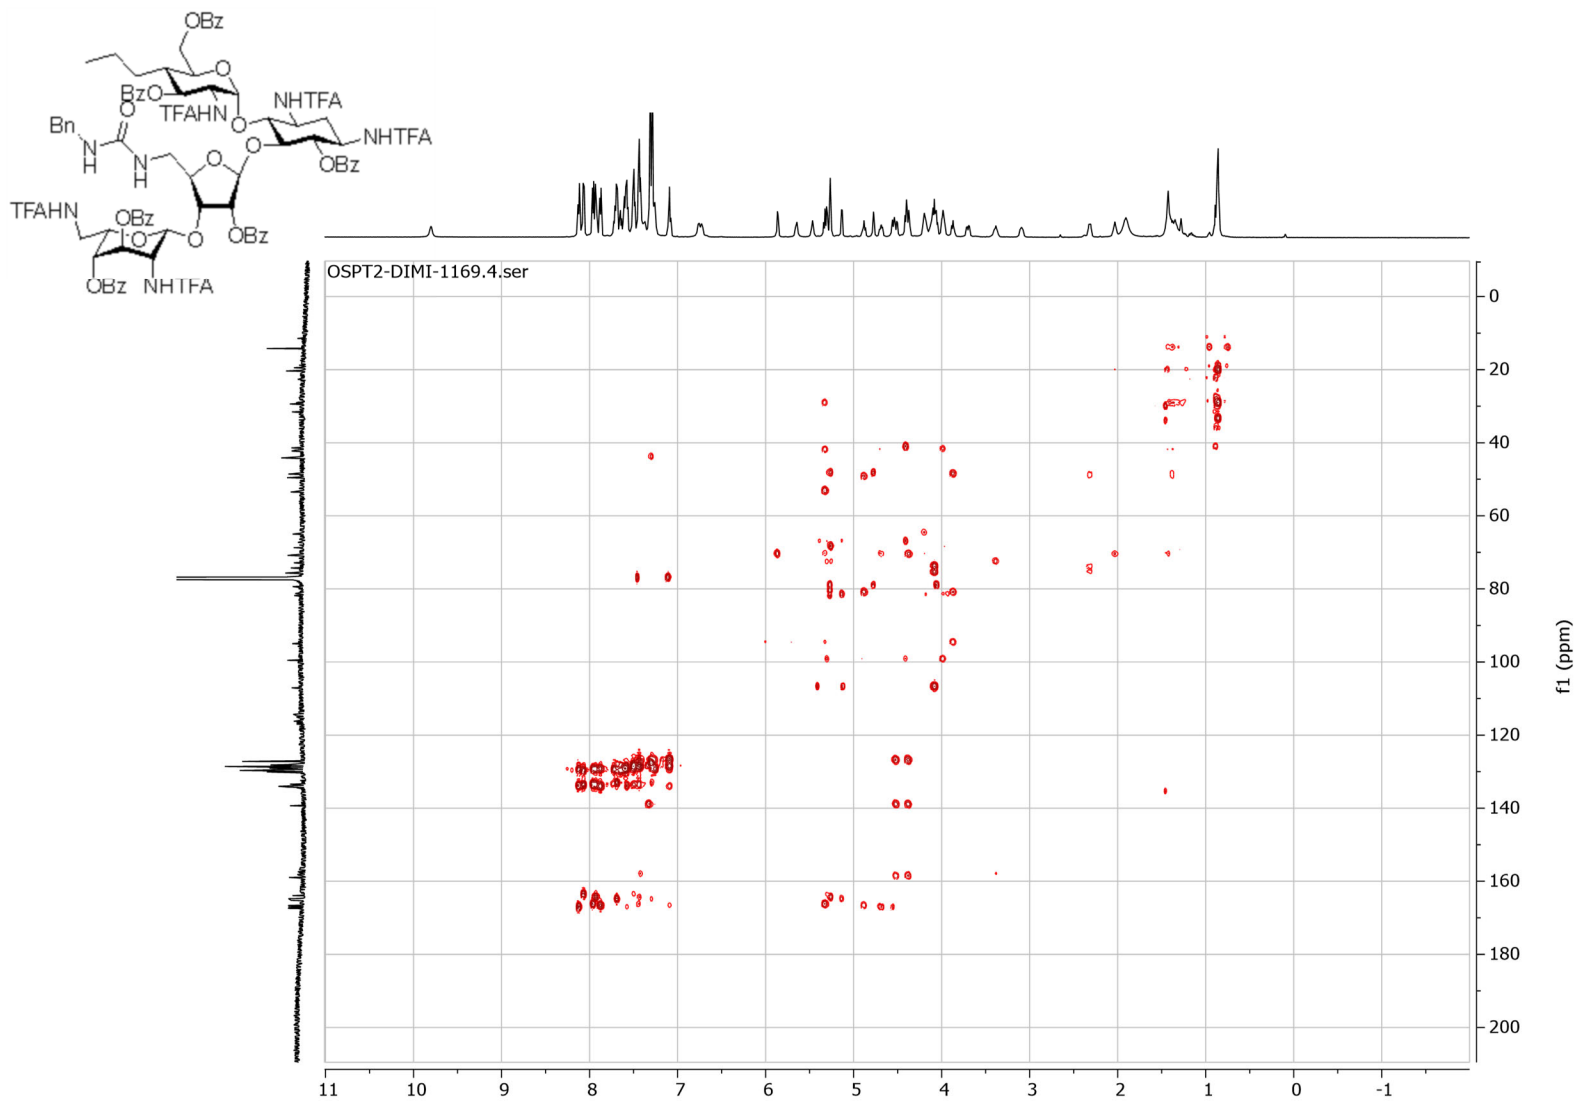

**4',5''-Dideoxy-4'-propyl-5''-(*N*-benzylureido)-6,3',6',2'',3''',4'''-hexa-*O*-benzoyl-1,3,2',2''',6'''-penta-*N*-trifluoroacetyl paromomycin (40)**

[<sup>1</sup>H, <sup>1</sup>H ROESY, 600 MHz, CDCl<sub>3</sub>]

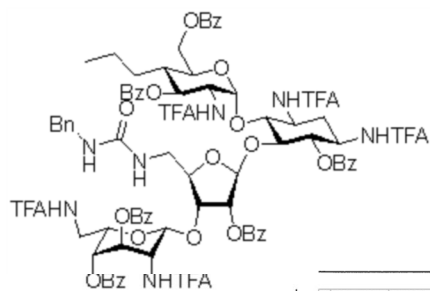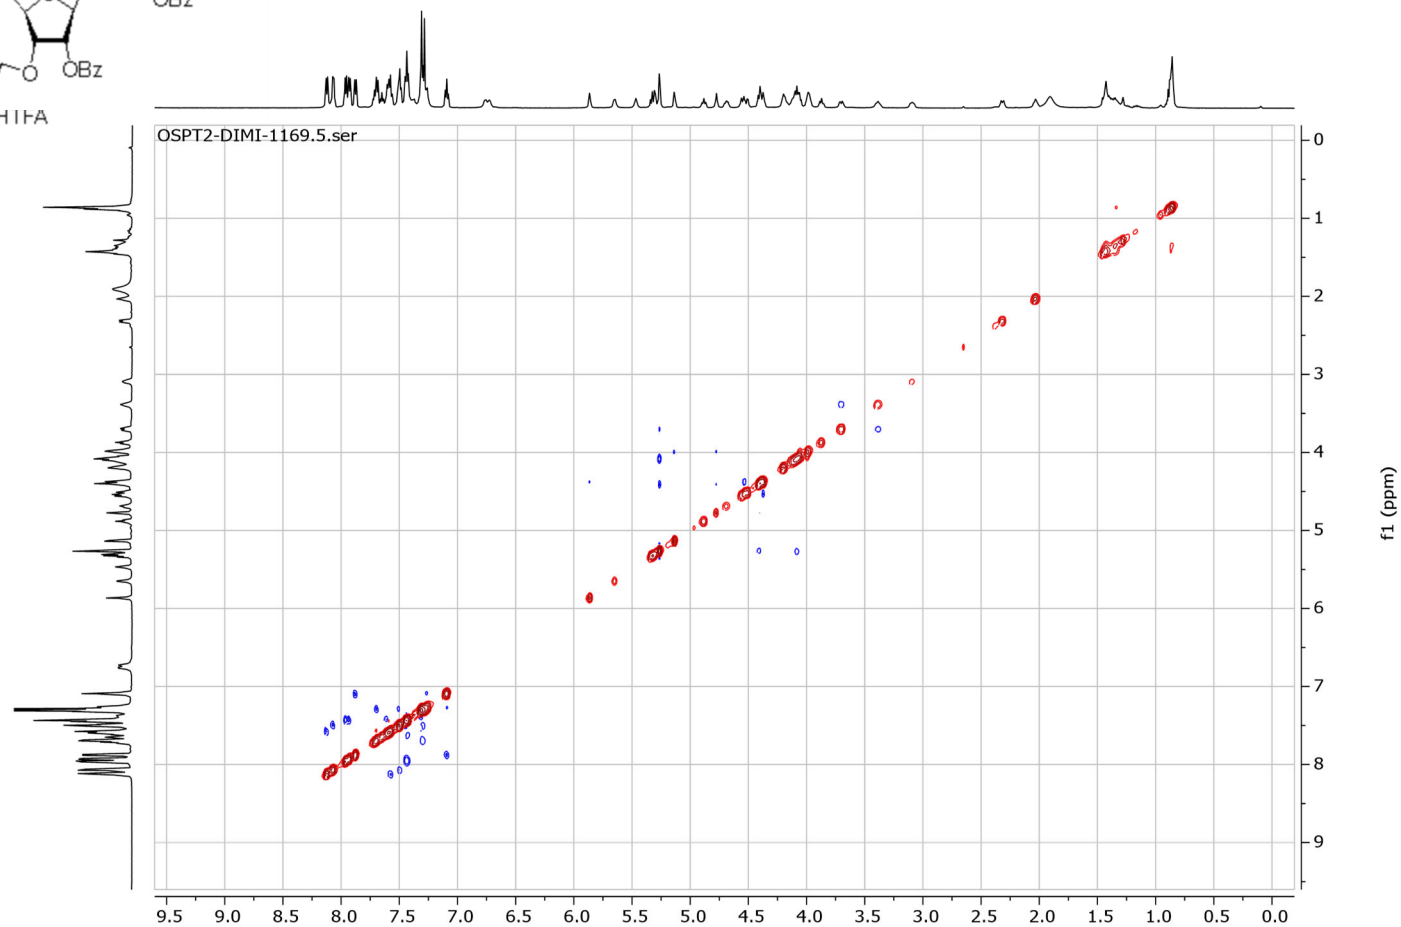



## 4',5''-Dideoxy-4'-propyl-5''-(*N*-benzylureido)-6,3',6',2'',3''',4'''-hexa-*O*-benzoyl-1,3,2',2''',6'''-penta-*N*-trifluoroacetyl paromomycin (40)

Latvijas Organiskās sintēzes institūts  
Fizikāli organiskās ķīmijas laboratorija

**MS: Waters Synapt G2-Si** Capillary, kV: 0.7      **LC: Acquity UPLC H-Class** Column: Acquity UPLC BEH C18  
**ESI+** Cone, V: 40      2.1x50mm, 1.7µm

### Sample:

HRMS\_2020\_10\_382 3165 Lubriks DIMI-1387

MS\_POS\_500-2000\_RES\_7min ACN\_Form\_5-98\_040\_7min 1:E,5 1.000000 MS\_Tune Col#66

### Elemental Composition Report:

Tolerance = 5.0 PPM / DBE: min = -1.5, max = 50.0

Element prediction: Off

Number of isotope peaks used for i-FIT = 7

Monoisotopic Mass, Even Electron Ions

2255 formula(e) evaluated with 17 results within limits (up to 5 closest results for each mass)

Elements Used:

C: 0-100 H: 0-100 N: 0-15 O: 0-30 F: 15-15

| Mass      | RA     | Calc. Mass | mDa  | PPM  | DBE  | i-FIT  | Norm  | Conf(%) | Formula             |
|-----------|--------|------------|------|------|------|--------|-------|---------|---------------------|
| 1878.4929 | 100.00 | 1878.4929  | 0.0  | 0.0  | 31.5 | 1339.8 | 0.151 | 85.98   | C70 H79 N15 O29 F15 |
|           |        | 1878.4924  | 0.5  | 0.3  | 38.5 | 1344.1 | 4.476 | 1.14    | C85 H83 N3 O28 F15  |
|           |        | 1878.4937  | -0.8 | -0.4 | 43.5 | 1344.1 | 4.452 | 1.17    | C86 H79 N7 O24 F15  |
|           |        | 1878.4910  | 1.9  | 1.0  | 44.5 | 1341.8 | 2.244 | 10.60   | C82 H75 N13 O22 F15 |
|           |        | 1878.4950  | -2.1 | -1.1 | 48.5 | 1344.1 | 4.496 | 1.12    | C87 H75 N11 O20 F15 |

### 3165 Lubriks DIMI-1387

HRMS\_2020\_10\_382 1681 (4.703) Cm (1681:1694-(1652:1664+1714:1725))

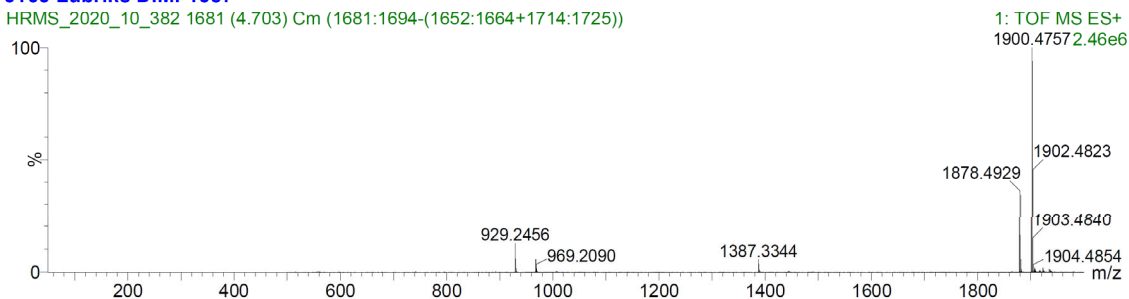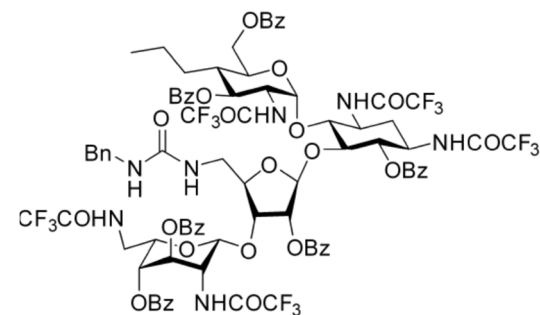

**4',5''-Dideoxy-4'-propyl-5''-(*N*-trifluoroacetylglycinamido)-6,3',6',2'',3''',4''''-hexa-*O*-benzoyl-1,3,2',2''',6''''-penta-*N*-trifluoroacetyl paromomycin (41)**

[<sup>1</sup>H-NMR, 400 MHz, CD<sub>3</sub>OD]

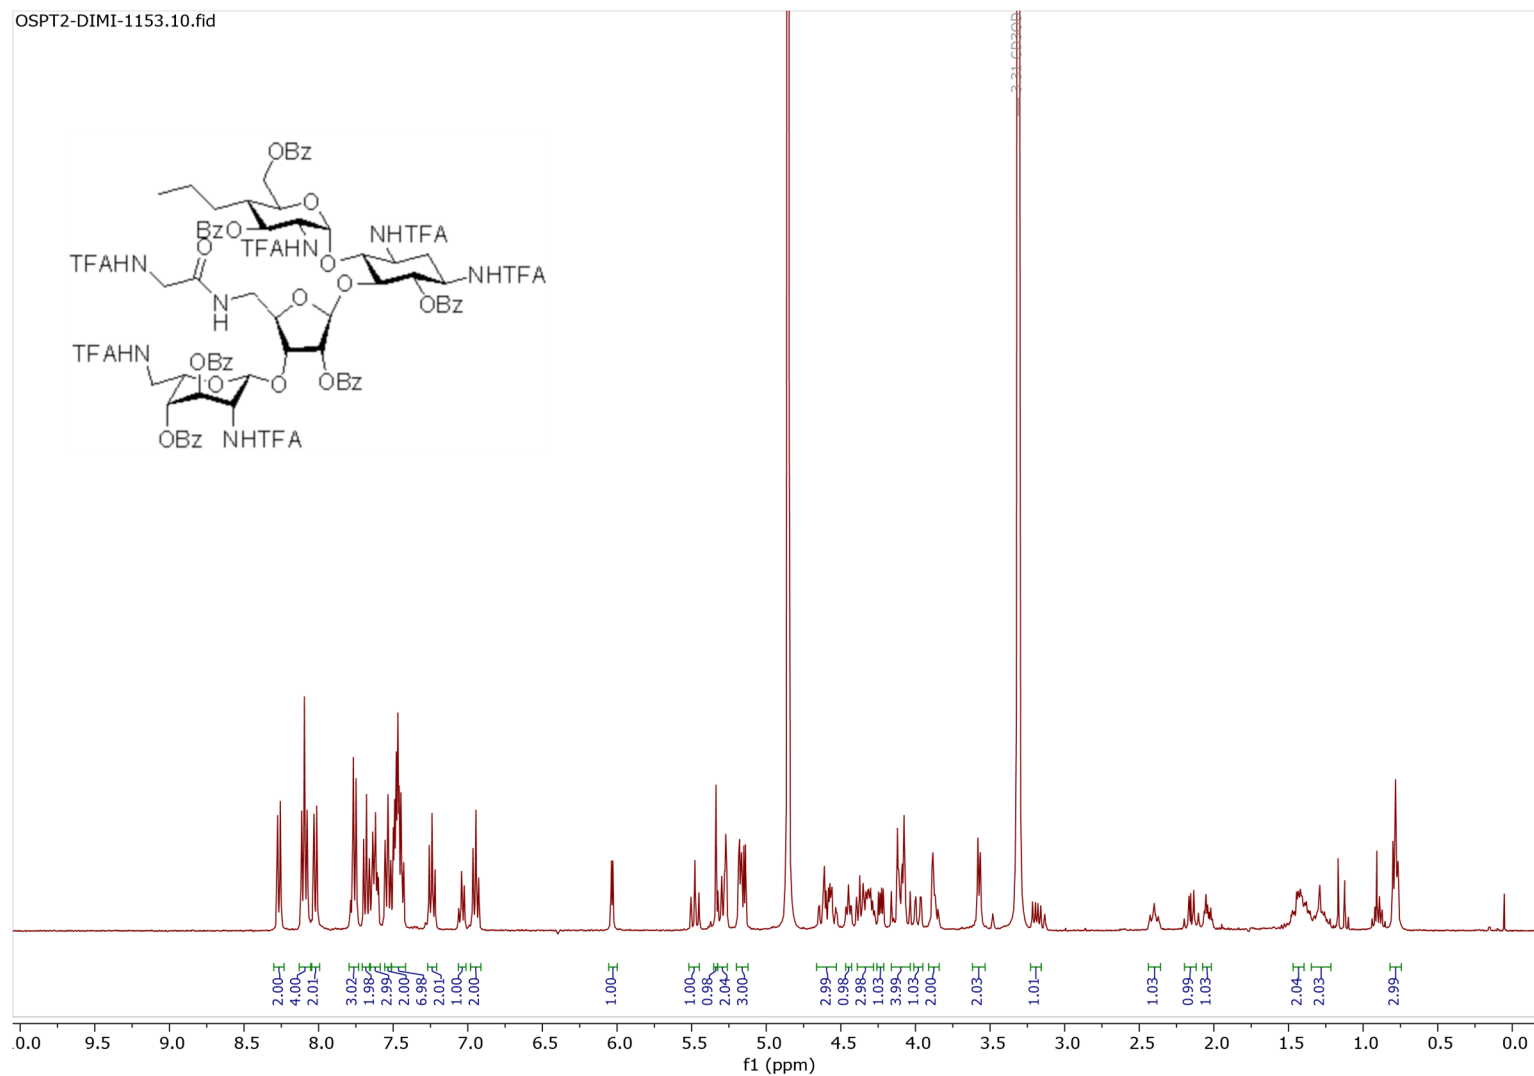

**4',5''-Dideoxy-4'-propyl-5''-(*N*-trifluoroacetylglycinamido)-6,3',6',2'',3''',4'''-hexa-*O*-benzoyl-1,3,2',2''',6'''-penta-*N*-trifluoroacetyl paromomycin (41)**

[<sup>13</sup>C-NMR, 100.6 MHz, CD<sub>3</sub>OD]

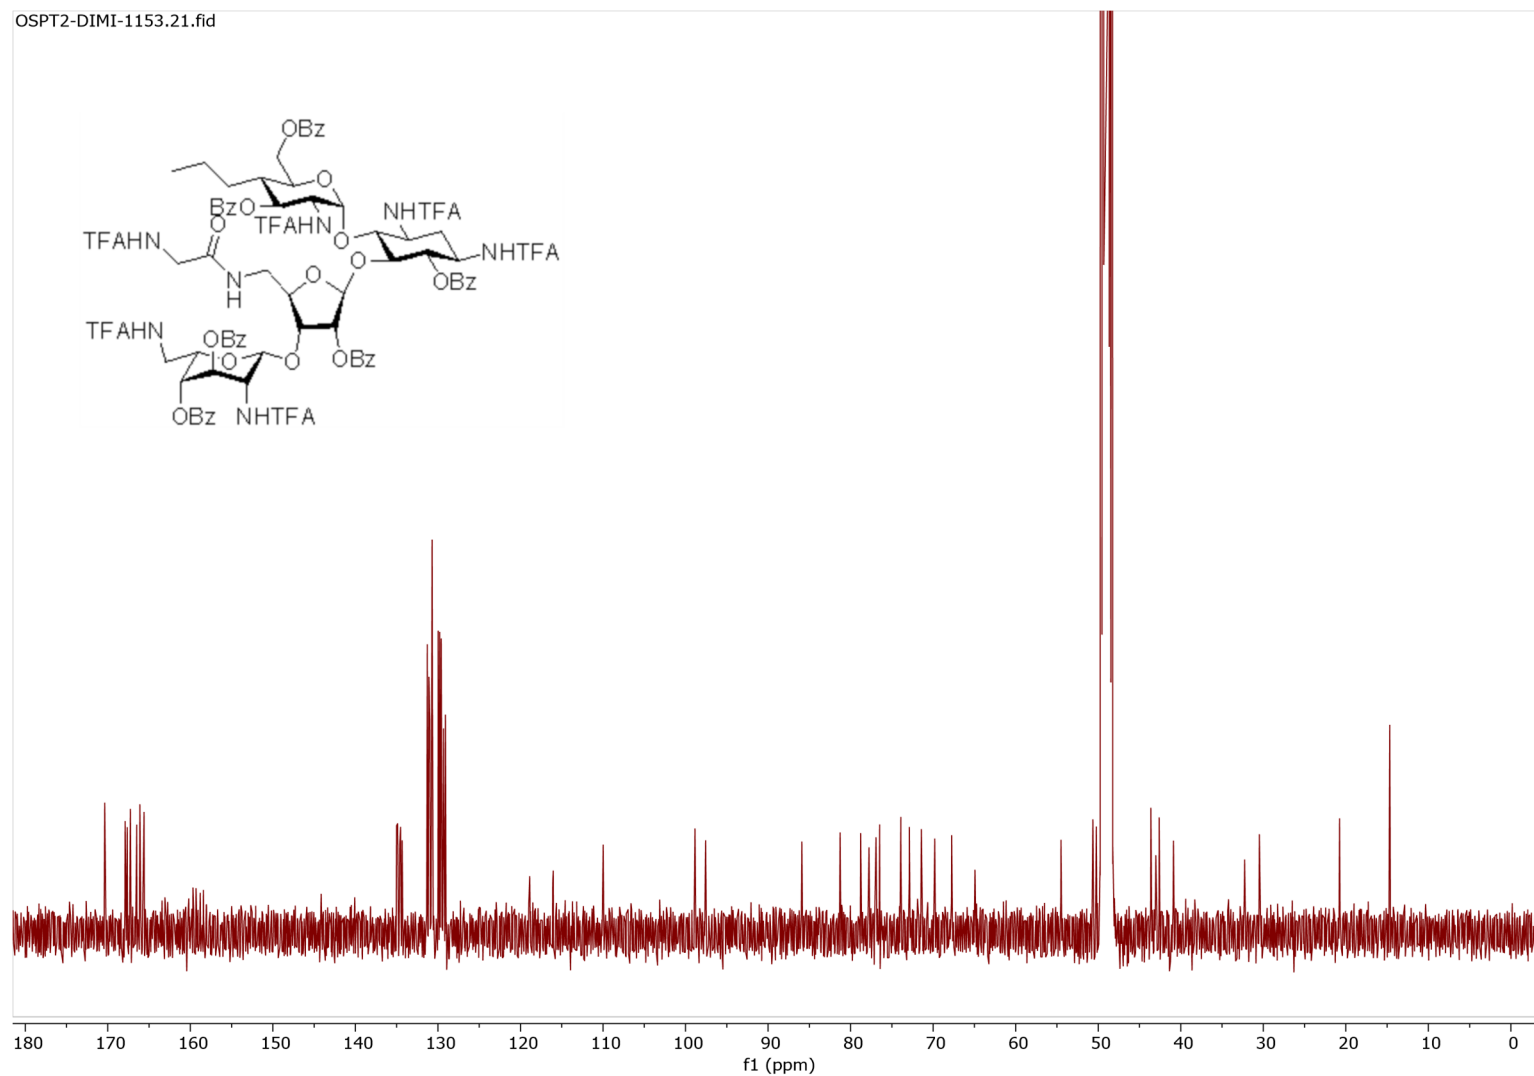

**4',5''-Dideoxy-4'-propyl-5''-(*N*-trifluoroacetylglycinamido)-6,3',6',2'',3''',4''''-hexa-*O*-benzoyl-1,3,2',2''',6''''-penta-*N*-trifluoroacetyl paromomycin (41)**

[<sup>1</sup>H, <sup>13</sup>C HSQC, 400 MHz, 100.6 MHz, CD<sub>3</sub>OD]

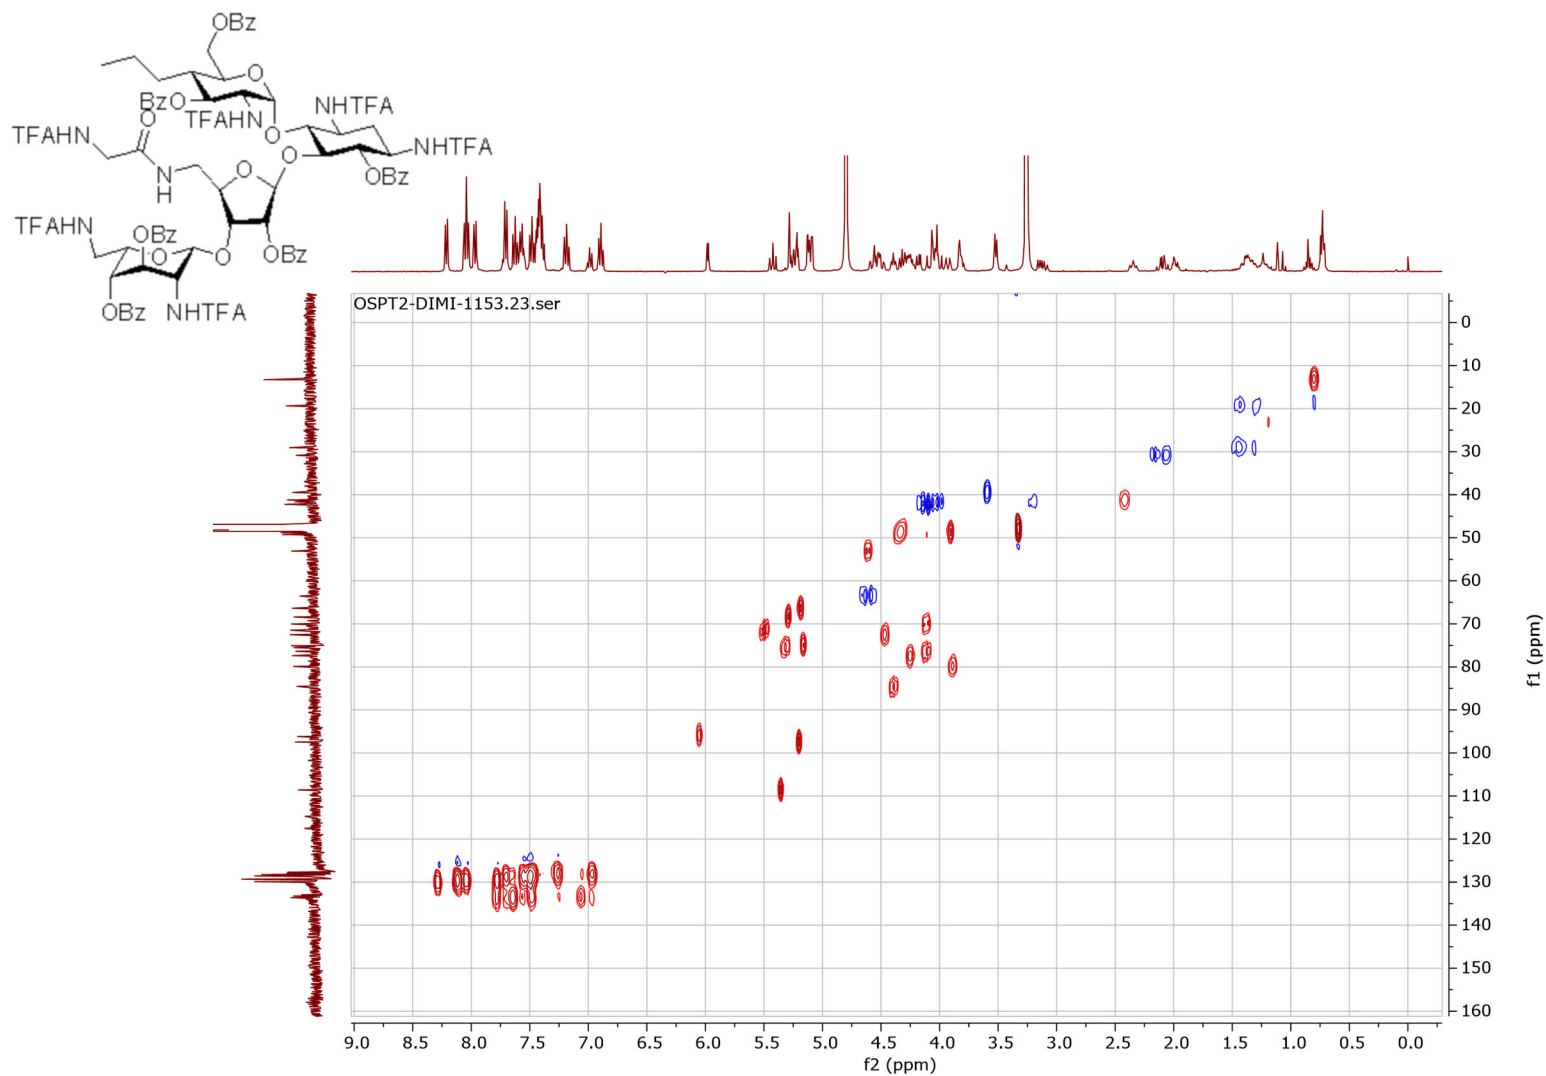

**4',5''-Dideoxy-4'-propyl-5''-(*N*-trifluoroacetylglycinamido)-6,3',6',2'',3''',4'''-hexa-*O*-benzoyl-1,3,2',2''',6'''-penta-*N*-trifluoroacetyl paromomycin (41)**

[<sup>1</sup>H, <sup>13</sup>C HMBC, 400 MHz, 100.6 MHz, CD<sub>3</sub>OD]

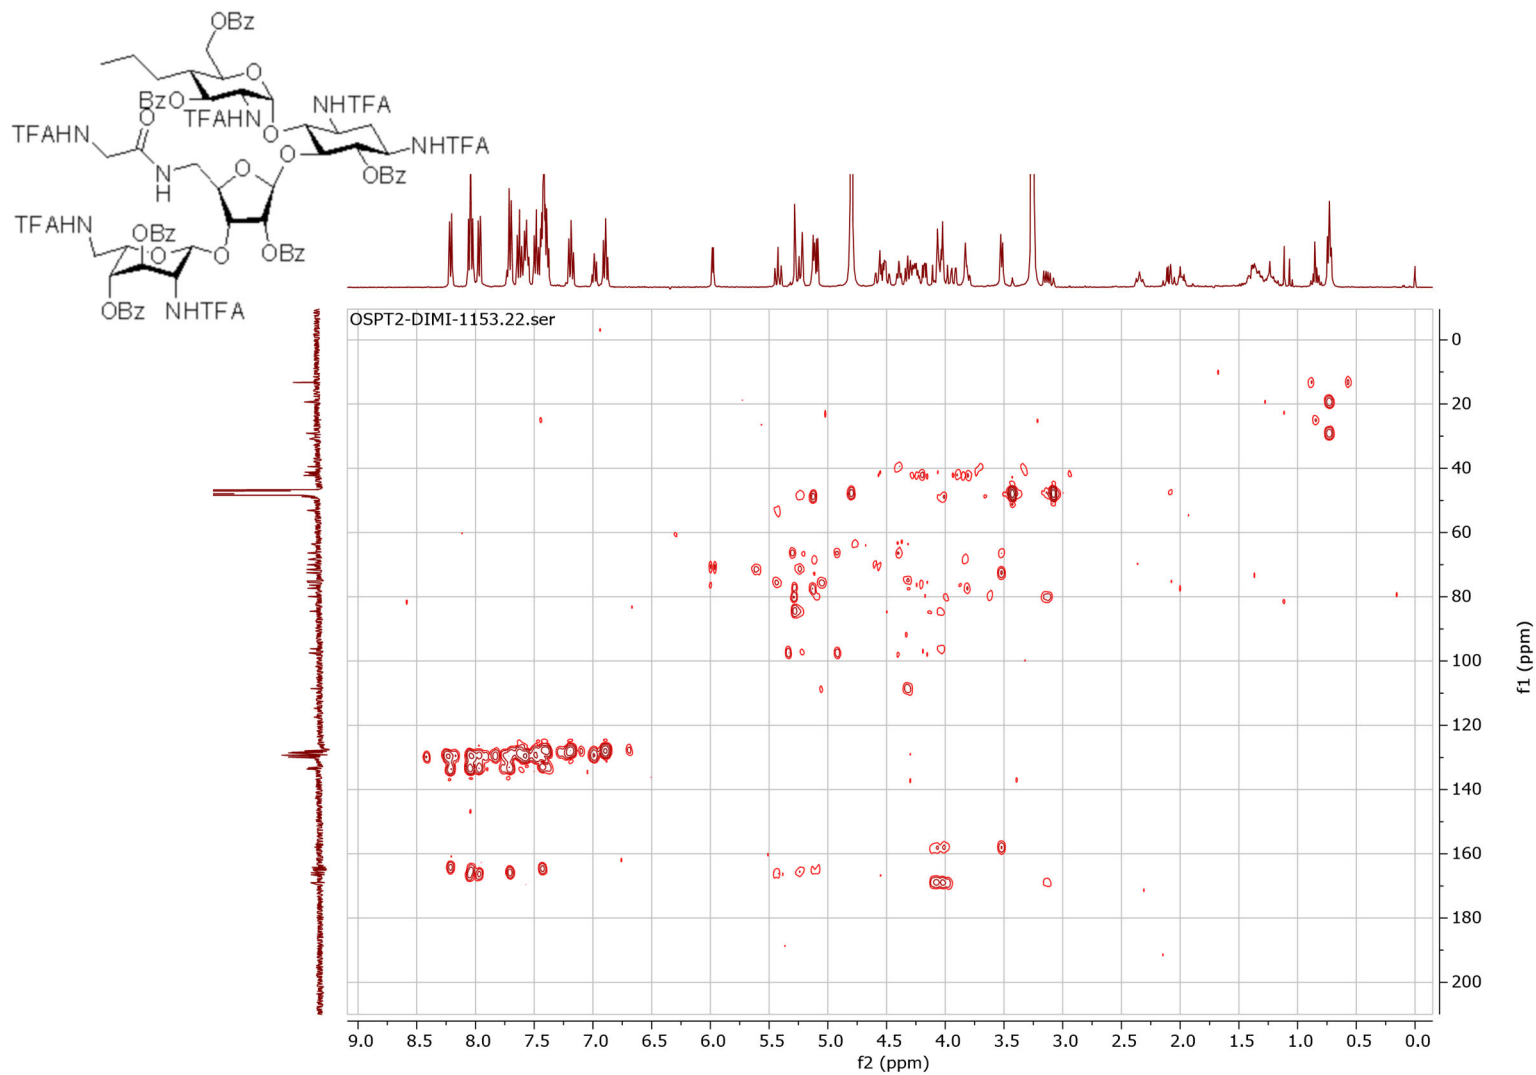

**4',5''-Dideoxy-4'-propyl-5''-(*N*-trifluoroacetylglycinamido)-6,3',6',2'',3''',4''''-hexa-*O*-benzoyl-1,3,2',2''',6''''-penta-*N*-trifluoroacetyl paromomycin (41)**

Latvijas Organiskās sintēzes institūts  
Fizikāli organiskās ķīmijas laboratorija

MS: Waters Synapt G2-Si Capillary, kV: 0.7 LC: Acquity UPLC H-Class Column: Acquity UPLC BEH C18  
ESI+ Cone, V: 40 2.1x50mm, 1.7µm

**Sample:**

HRMS\_2021\_05\_164 902 Lubriks DIMI-1153-atk  
MS\_POS\_500-2000\_RES\_7min ACN\_Form\_5-98\_040\_7min 1:B,1 1.000000 MS\_Tune Col#66

**Elemental Composition Report:**

Tolerance = 5.0 PPM / DBE: min = -1.5, max = 50.0

Element prediction: Off

Number of isotope peaks used for i-FIT = 5

Monoisotopic Mass, Even Electron Ions

2094 formula(e) evaluated with 12 results within limits (up to 5 closest results for each mass)

Elements Used:

C: 0-100 H: 0-110 N: 0-15 O: 0-25 F: 18-18 Na: 1-1

| Mass      | RA     | Calc. Mass | mDa  | PPM  | DBE  | i-FIT | Norm  | Conf(%) | Formula                |
|-----------|--------|------------|------|------|------|-------|-------|---------|------------------------|
| 1920.4257 | 100.00 | 1920.4266  | -0.9 | -0.5 | 40.5 | 990.4 | 1.666 | 18.91   | C82 H73 N7 O25 F18 Na  |
|           |        | 1920.4240  | 1.7  | 0.9  | 41.5 | 989.4 | 0.625 | 53.52   | C78 H69 N13 O23 F18 Na |
|           |        | 1920.4235  | 2.2  | 1.1  | 48.5 | 992.3 | 3.541 | 2.90    | C93 H73 N O22 F18 Na   |
|           |        | 1920.4280  | -2.3 | -1.2 | 45.5 | 990.4 | 1.693 | 18.40   | C83 H69 N11 O21 F18 Na |
|           |        | 1920.4208  | 4.9  | 2.6  | 49.5 | 991.5 | 2.769 | 6.27    | C89 H69 N7 O20 F18 Na  |

**902 Lubriks DIMI-1153-atk**

HRMS\_2021\_05\_164 1632 (4.564) Cm (1632:1641-1587:1604)

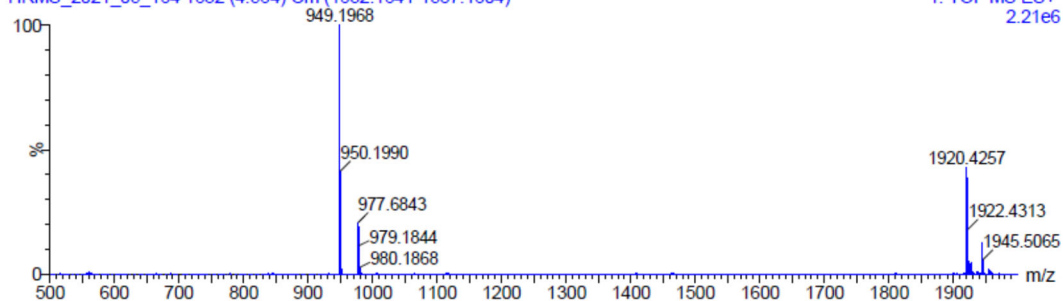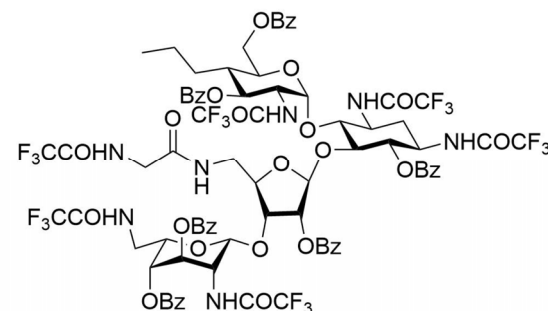

# 5''-Amino-4',5''-dideoxy-4'-propyl paromomycin pentaacetate (8)

[<sup>1</sup>H-NMR, 600 MHz, D<sub>2</sub>O]

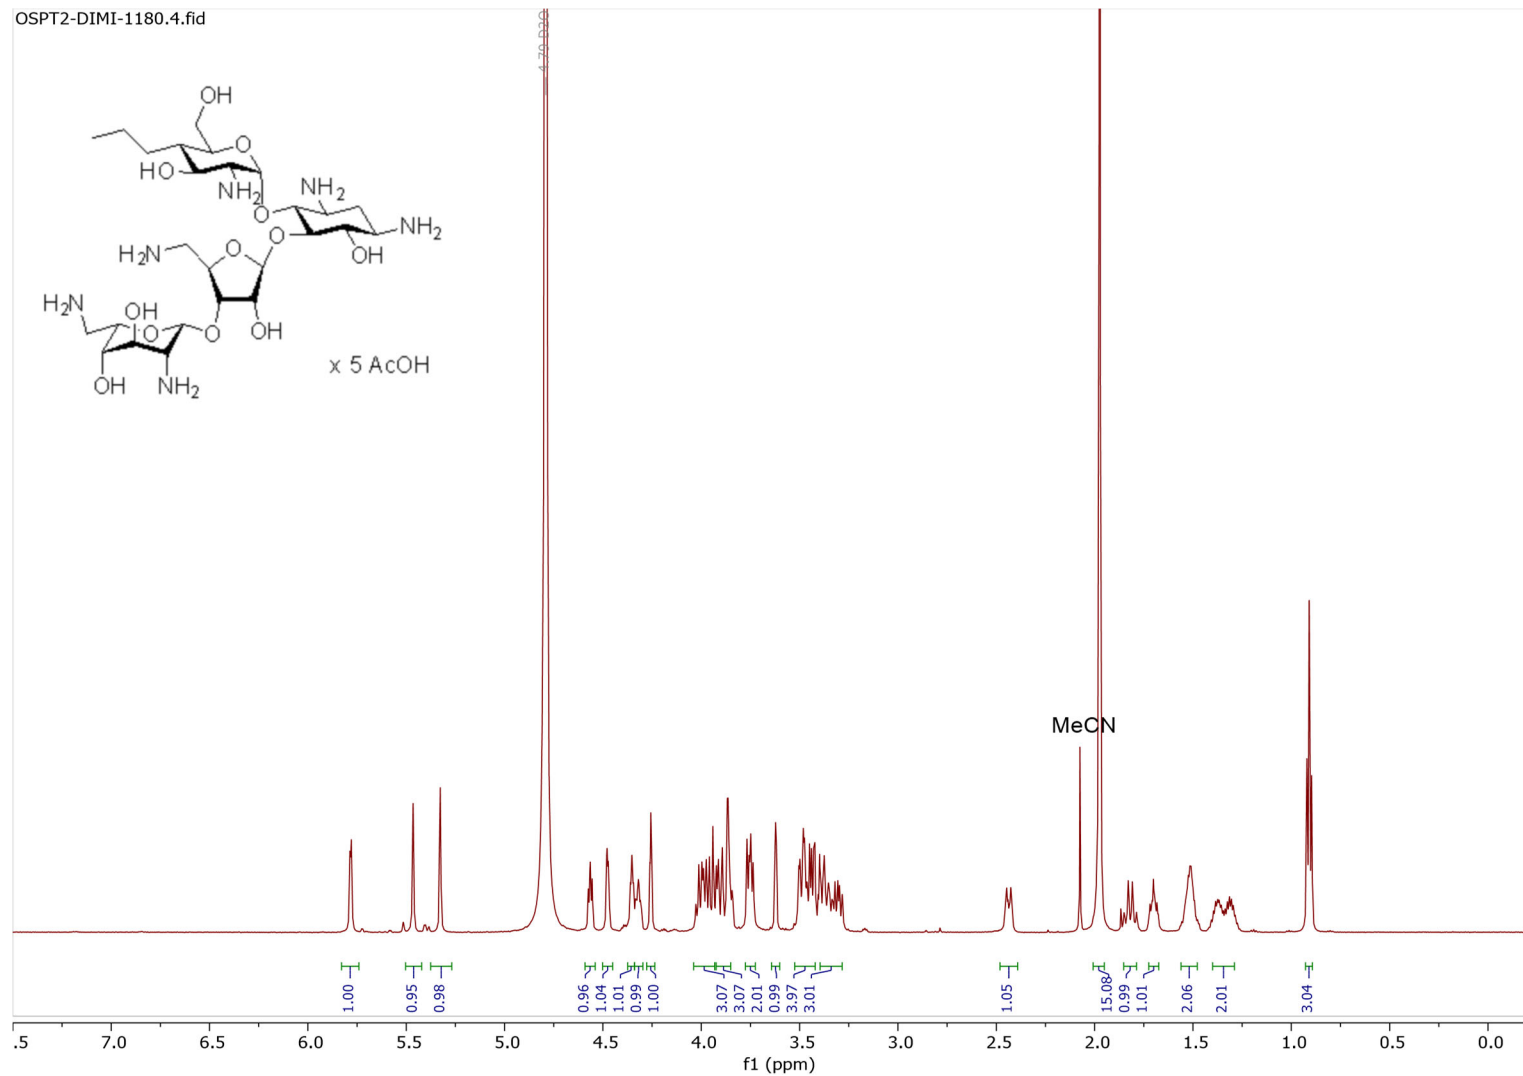

**5''-Amino-4',5''-dideoxy-4'-propyl paromomycin pentaacetate (8)**

[<sup>13</sup>C-NMR, 150.9 MHz, D<sub>2</sub>O]

OSPT-DIMI-1180-3.11.fid

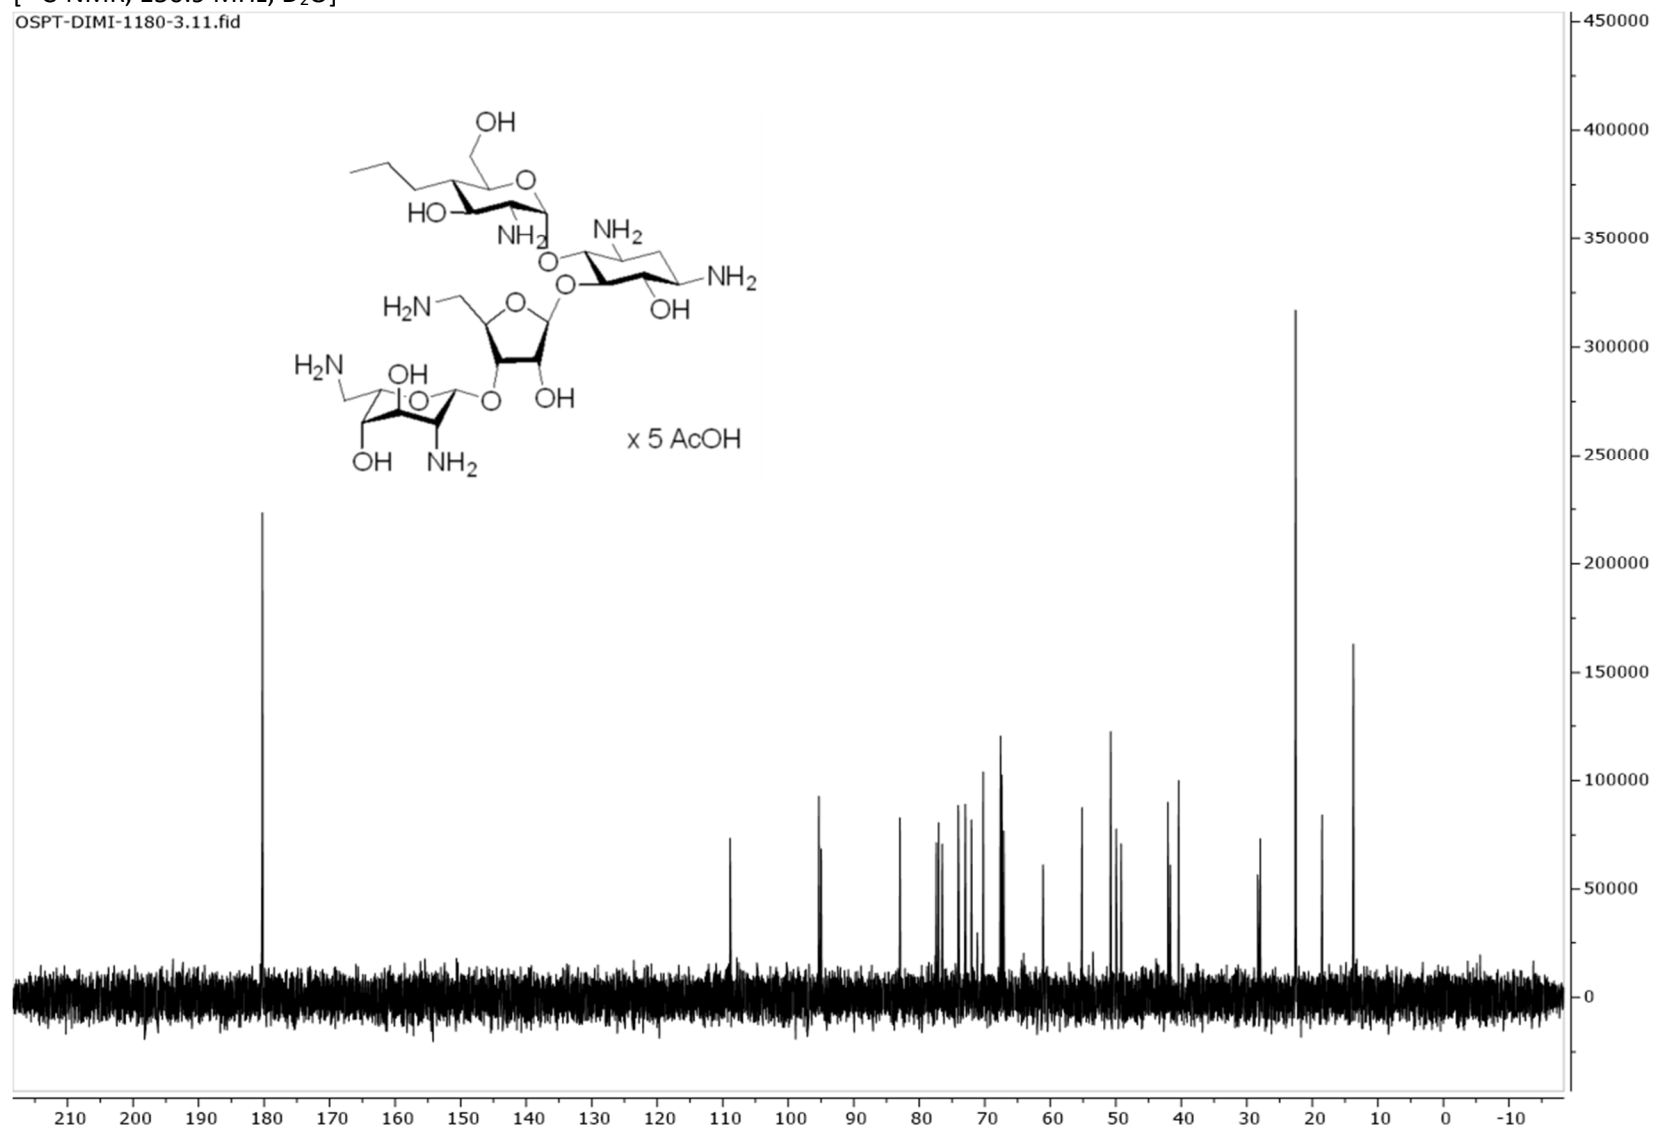



**5''-Amino-4',5''-dideoxy-4'-propyl paromomycin pentaacetate (8)**

[<sup>1</sup>H, <sup>13</sup>C HSQC, 600 MHz, 150.9 MHz, D<sub>2</sub>O]

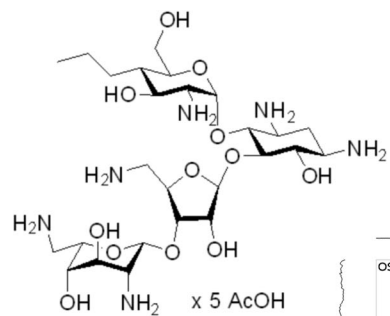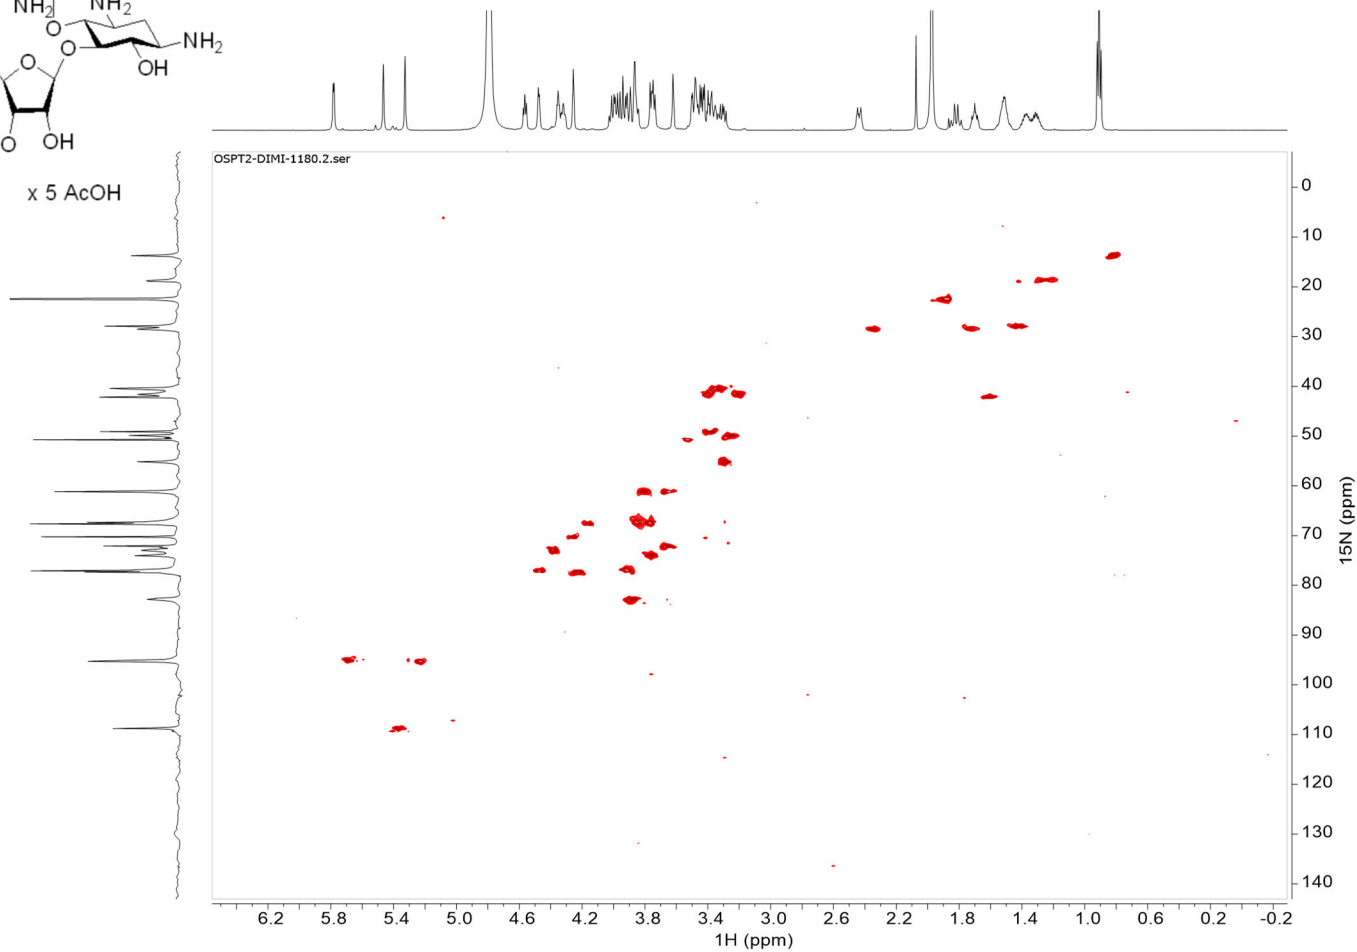

## 5''-Amino-4',5''-dideoxy-4'-propyl paromomycin pentaacetate (8)

Latvijas Organiskās sintēzes institūts  
Fizikāli organiskās ķīmijas laboratorija

**MS: Waters Synapt G2-Si** Capillary, kV: 0.7      **LC: Acquity UPLC H-Class** Column: Acquity UPLC BEH C18  
**ESI+** Cone, V: 40      2.1x50mm, 1.7µm

### Sample:

HRMS\_2019\_06\_031 787 Lubriks DIMI-1180  
MS\_POS\_RES\_4min ACN\_Form\_5-98\_040\_4min 1:C,5 5.000000 MS\_Tune Col#43

### Elemental Composition Report:

Tolerance = 5.0 PPM / DBE: min = -1.5, max = 50.0  
Element prediction: Off  
Number of isotope peaks used for i-FIT = 3

Monoisotopic Mass, Even Electron Ions  
1165 formula(e) evaluated with 7 results within limits (up to 3 closest results for each mass)  
Elements Used:  
C: 1-100 H: 1-110 N: 0-10 O: 0-15

| Mass     | RA     | Calc. Mass | mDa  | PPM  | DBE  | i-FIT | Norm   | Confr(%) | Formula        |
|----------|--------|------------|------|------|------|-------|--------|----------|----------------|
| 641.3732 | 100.00 | 641.3721   | 1.1  | 1.7  | 3.5  | 143.3 | 0.000  | 99.99    | C26 H53 N6 O12 |
|          |        | 641.3735   | -0.3 | -0.5 | 8.5  | 152.5 | 9.206  | 0.01     | C27 H49 N10 O8 |
|          |        | 641.3743   | -1.1 | -1.7 | 20.5 | 162.8 | 19.429 | 0.00     | C43 H49 N2 O3  |

### 787 Lubriks DIMI-1180

HRMS\_2019\_06\_031 414 (1.195) Cm (399:436-(552:590+293:325))

1: TOF MS ES+  
8.53e6

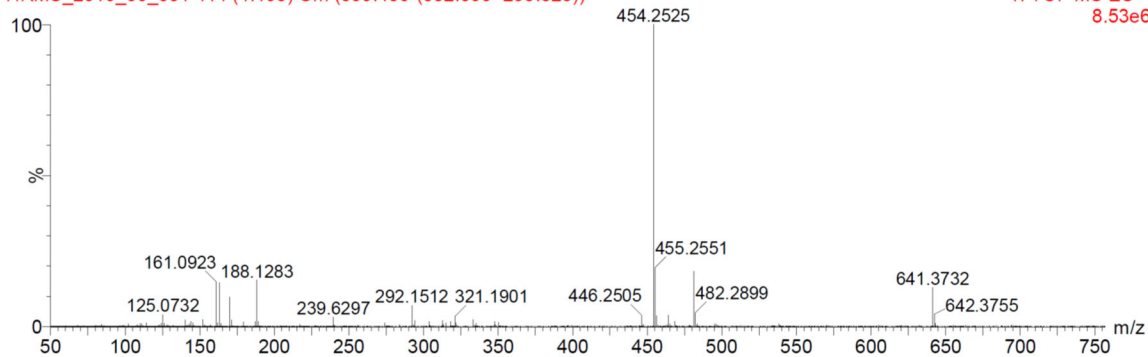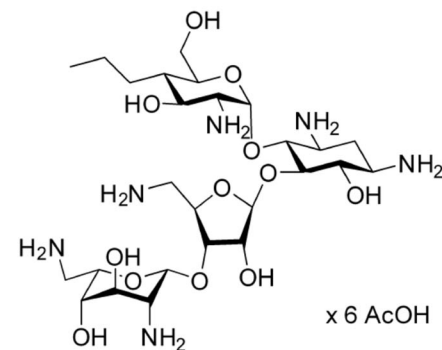

# 5''-(2-Aminoethylamino)-4',5''-dideoxy-4'-propyl paromomycin heptaacetate (9)

[<sup>1</sup>H-NMR, 600 MHz, D<sub>2</sub>O]

OSPT2-RZE-77-salt.1.fid

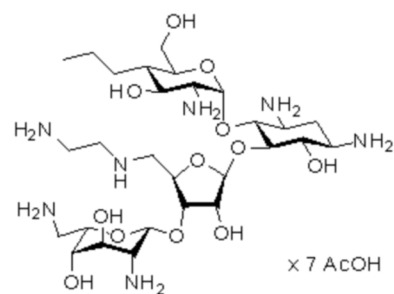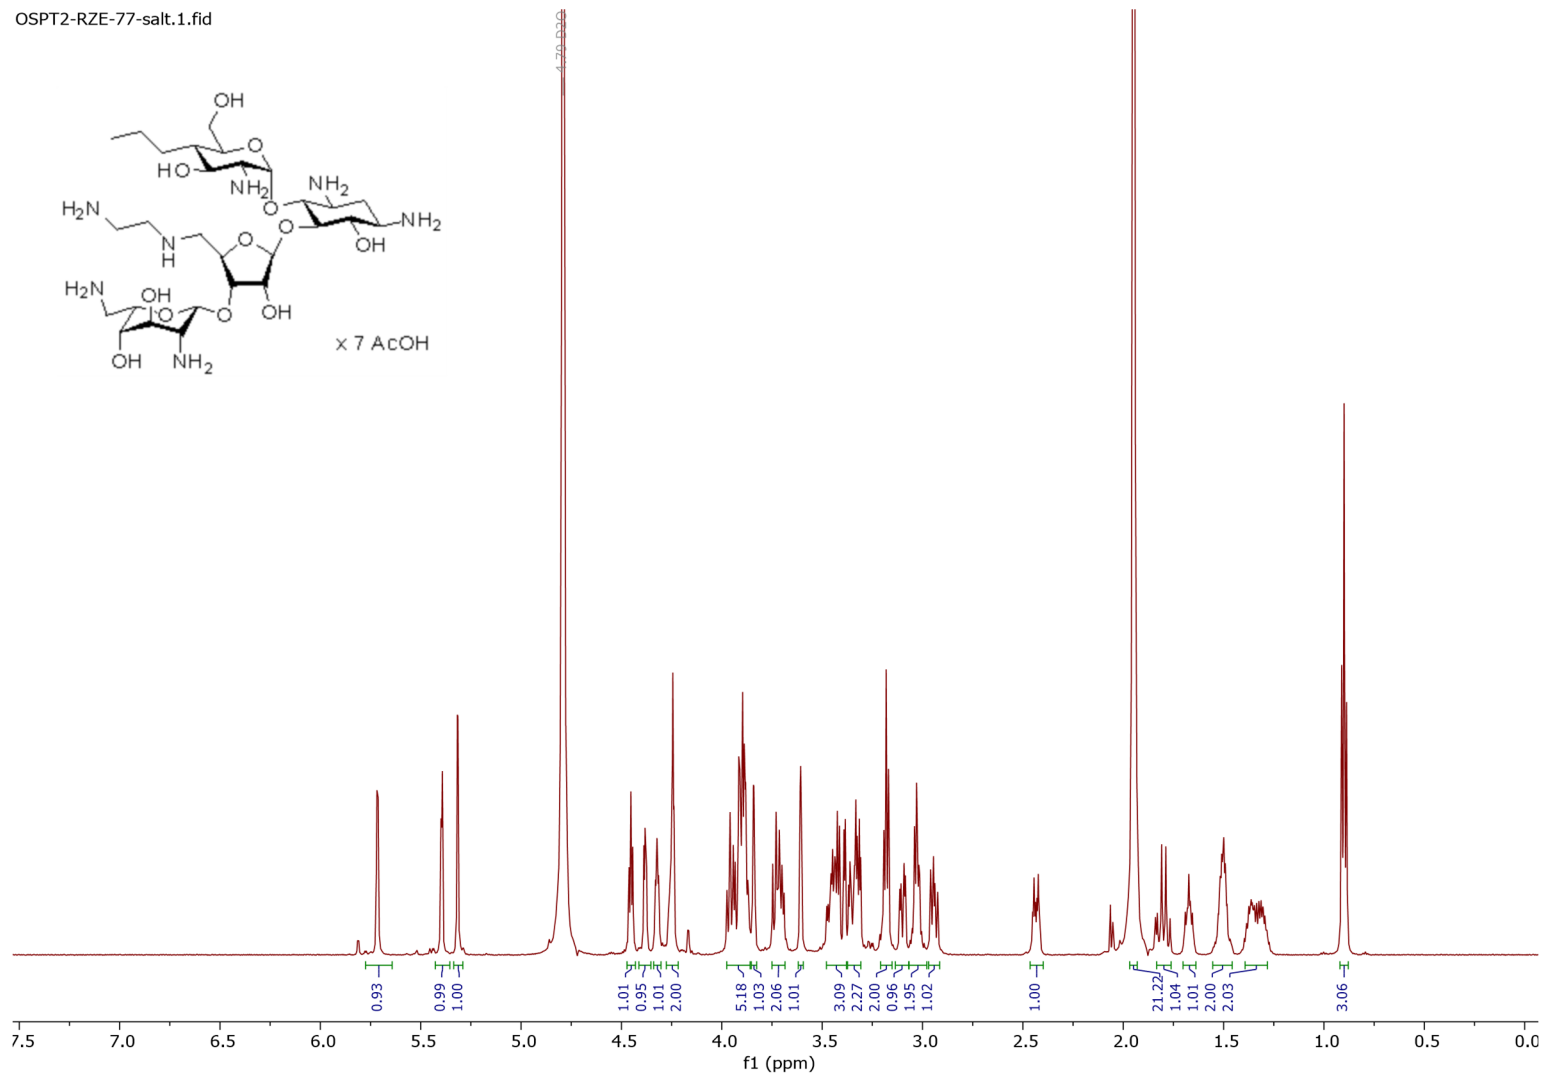

**5''-(2-Aminoethylamino)-4',5''-dideoxy-4'-propyl paromomycin heptaacetate (9)**

[<sup>13</sup>C-NMR, 150.9 MHz, D<sub>2</sub>O]

OSPT2-RZE-77-salt.4.fid

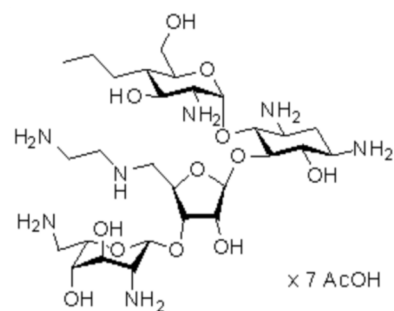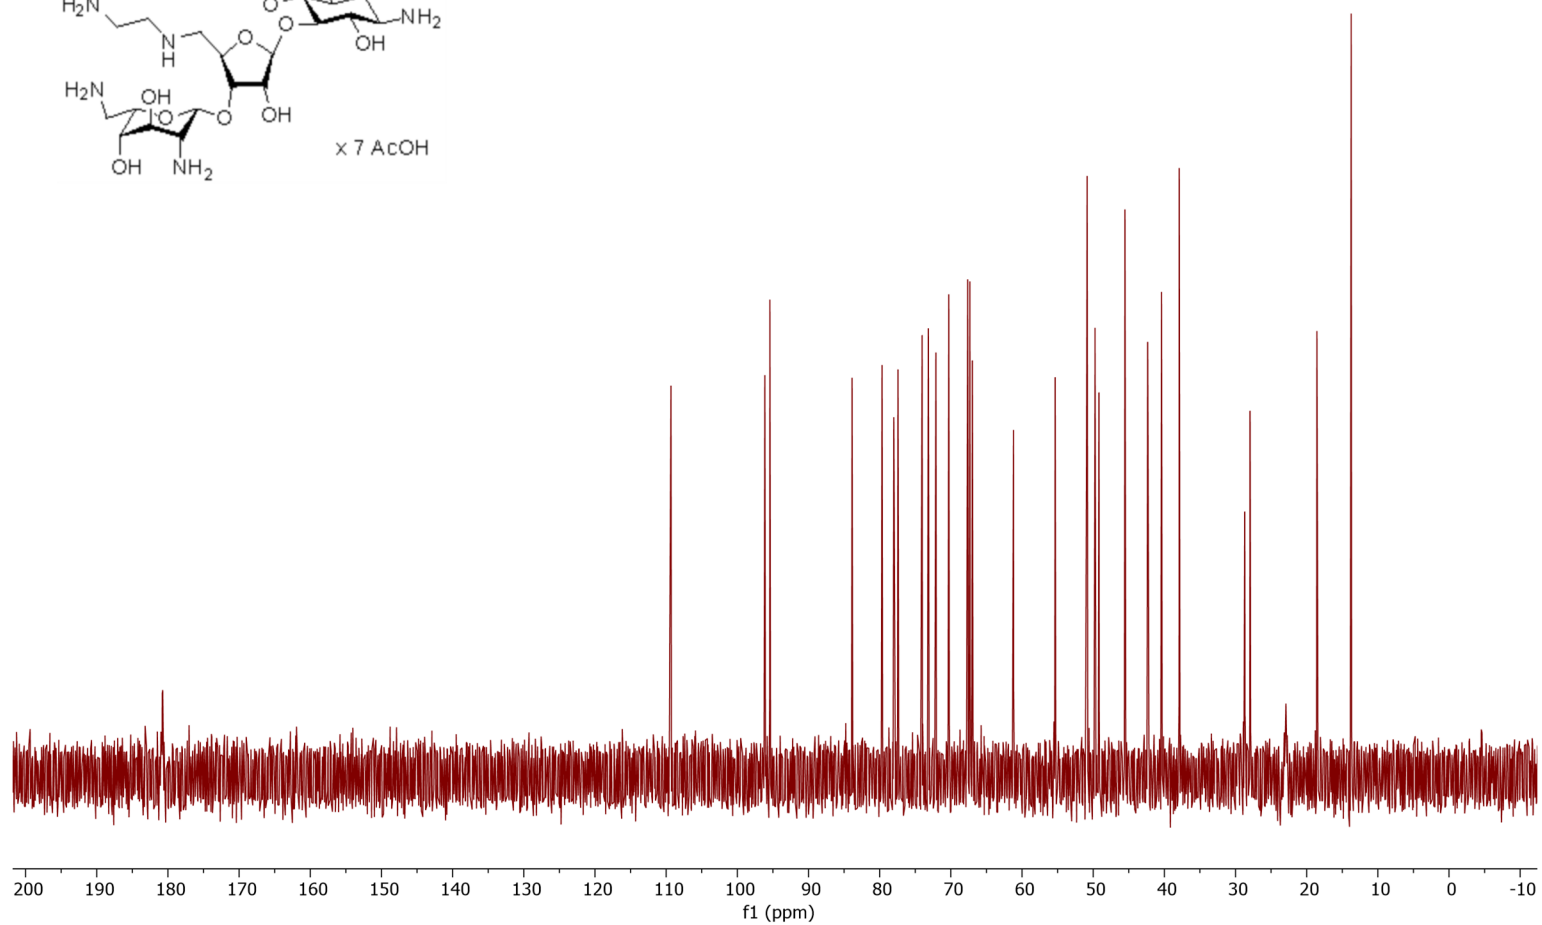

**5''-(2-Aminoethylamino)-4',5''-dideoxy-4'-propyl paromomycin heptaacetate (9)**

[<sup>1</sup>H, <sup>13</sup>C HSQC, 600 MHz, 150.9 MHz, D<sub>2</sub>O]

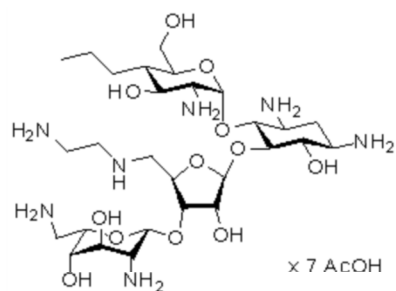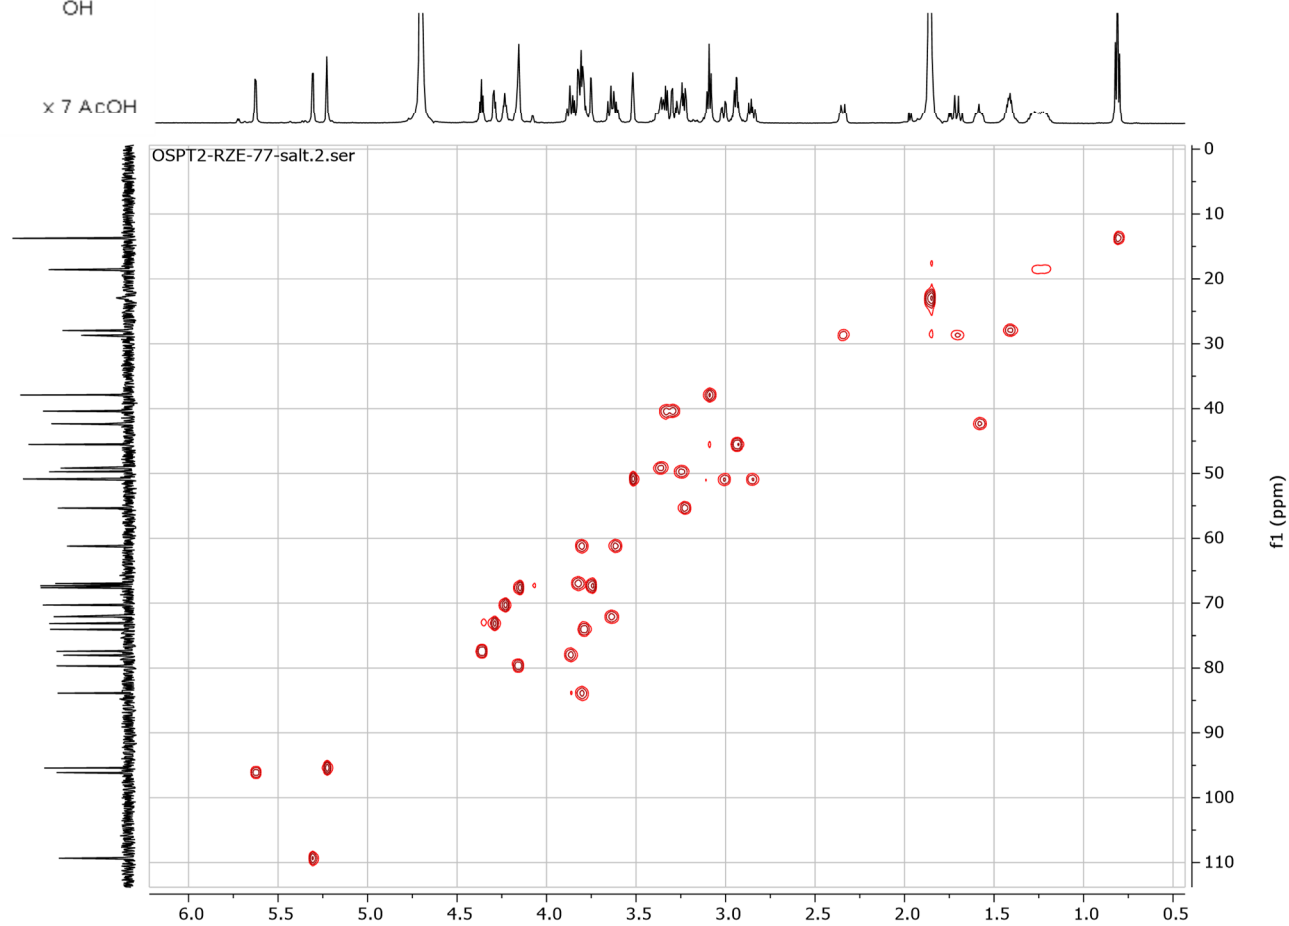

**5''-(2-Aminoethylamino)-4',5''-dideoxy-4'-propyl paromomycin heptaacetate (9)**

[<sup>1</sup>H, <sup>13</sup>C HMBC, 600 MHz, 150.9 MHz, D<sub>2</sub>O]

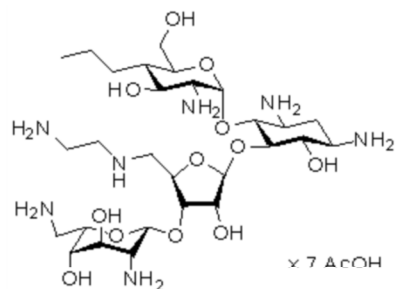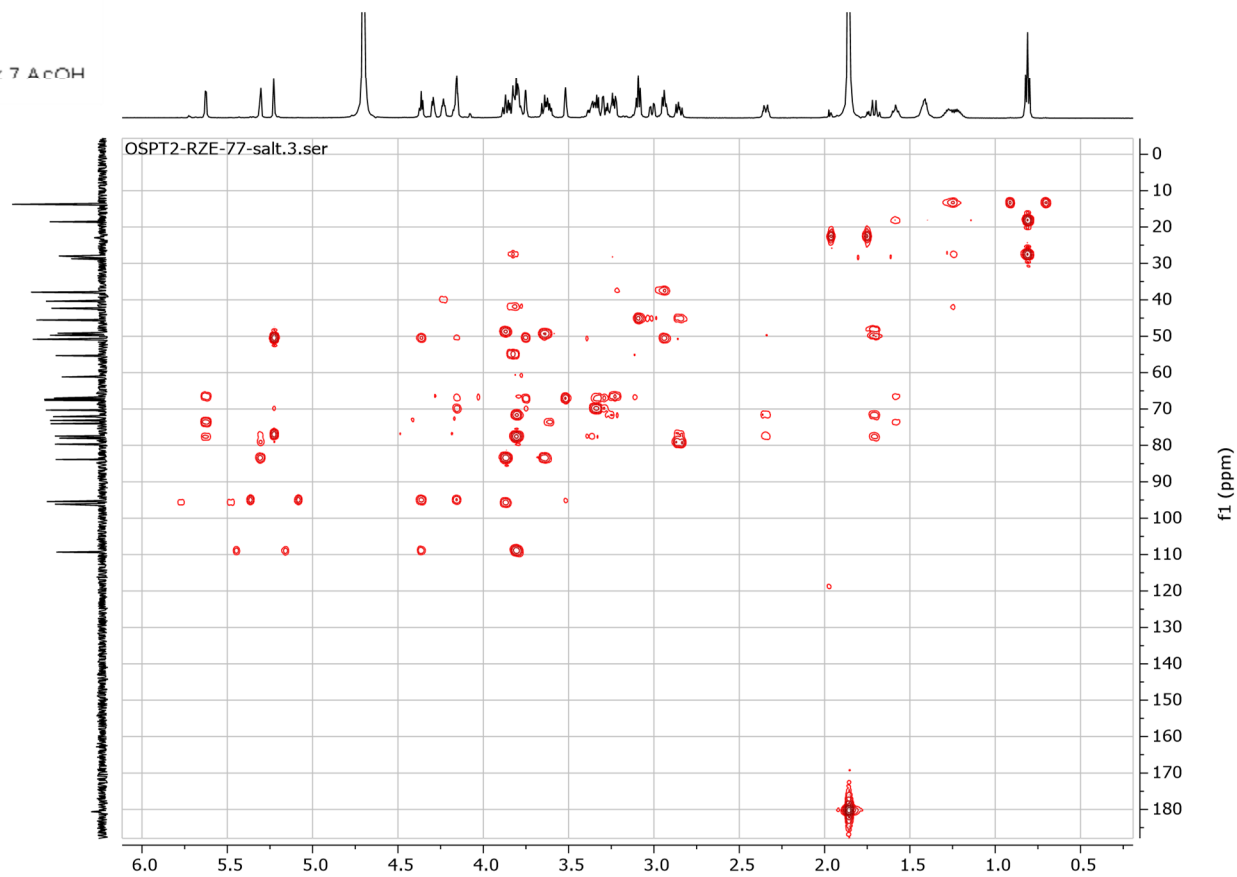

## 5''-(2-Aminoethylamino)-4',5''-dideoxy-4'-propyl paromomycin heptaacetate (9)

Latvijas Organiskās sintēzes institūts  
Fizikāli organiskās ķīmijas laboratorija

**MS: Waters Synapt G2-Si** Capillary, kV: 0.7    **LC: Acquity UPLC H-Class** Column: Acquity UPLC BEH C18  
**ESI+** Cone, V: 40    2.1x50mm, 1.7µm

### Sample:

HRMS\_2020\_02\_181 1867 Zogota RZE-77  
MS\_POS\_RES\_7min ACN\_Form\_5-98\_040\_7min 2:D,7 10.000000 MS\_Tune Col#43

### Elemental Composition Report:

Tolerance = 5.0 PPM / DBE: min = -1.5, max = 50.0  
Element prediction: Off  
Number of isotope peaks used for i-FIT = 3

Monoisotopic Mass, Even Electron Ions  
1114 formula(e) evaluated with 6 results within limits (up to 3 best isotopic matches for each mass)  
Elements Used:  
C: 0-50 H: 0-80 N: 0-10 O: 0-15

| Mass     | RA     | Calc. Mass | mDa  | PPM  | DBE  | i-FIT | Norm  | Conf(%) | Formula        |
|----------|--------|------------|------|------|------|-------|-------|---------|----------------|
| 684.4145 | 100.00 | 684.4143   | 0.2  | 0.3  | 3.5  | 623.3 | 0.007 | 99.32   | C28 H58 N7 O12 |
|          |        | 684.4170   | -2.5 | -3.7 | 2.5  | 628.4 | 5.148 | 0.58    | C32 H62 N O14  |
|          |        | 684.4138   | 0.7  | 1.0  | 21.5 | 630.1 | 6.870 | 0.10    | C41 H50 N9 O   |

### 1867 Zogota RZE-77

HRMS\_2020\_02\_181 138 (0.406) Cm (133:140-(74:83+233:240))

1: TOF MS ES+  
8.51e6

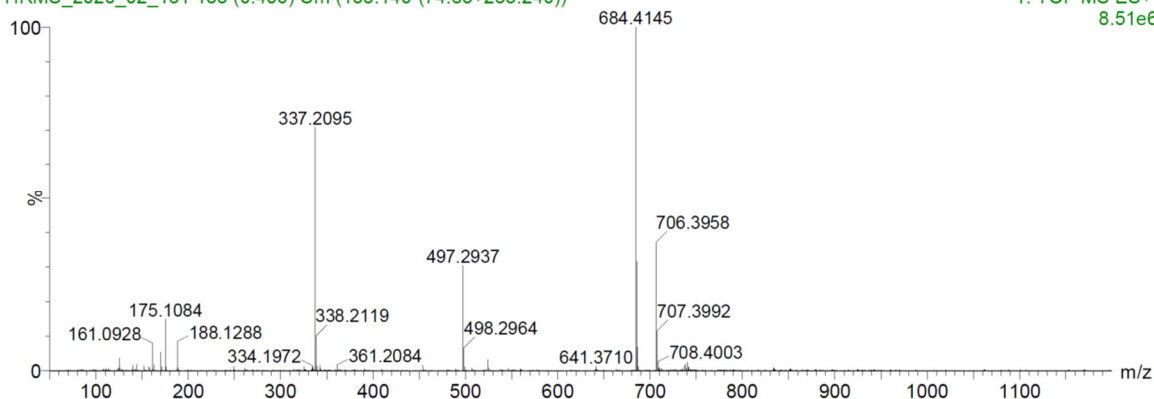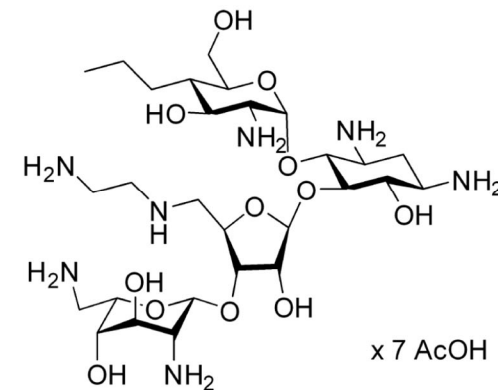

**5''-(3-Aminopropylamino)-4',5''-dideoxy-4'-propyl paromomycin heptaacetate (10)**

[<sup>1</sup>H-NMR, 600 MHz, D<sub>2</sub>O]

OSPT2-RZE-83-salt.1.fid

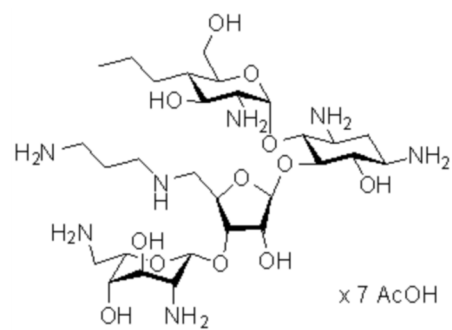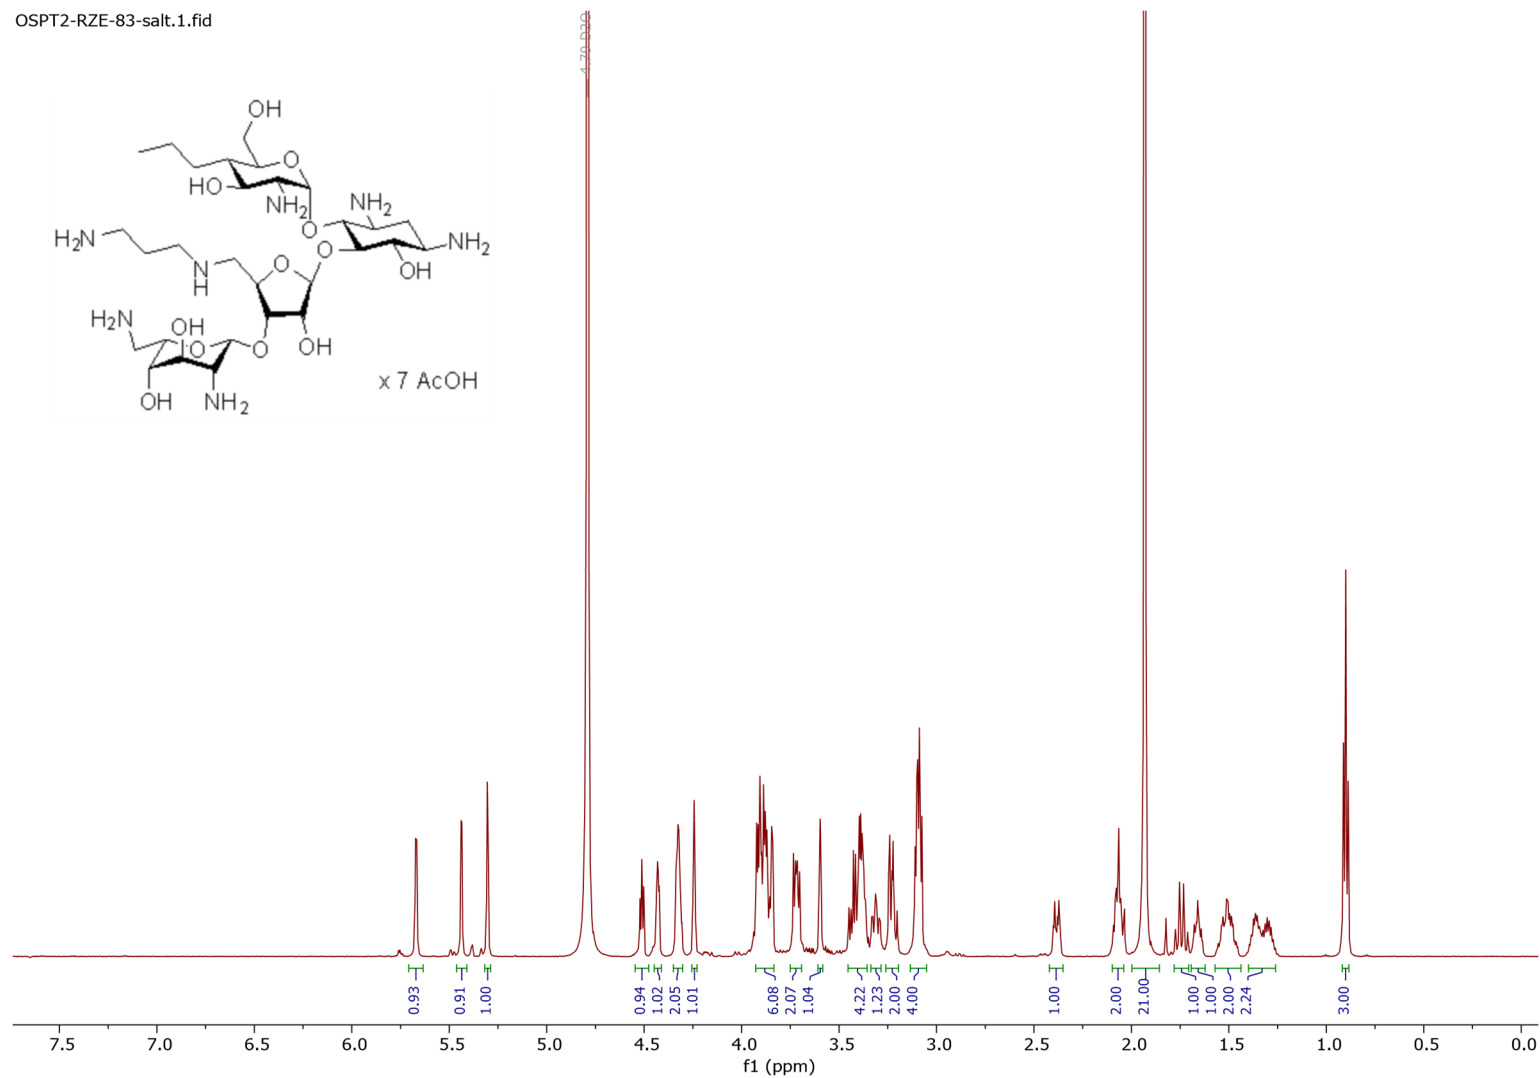



**5''-(3-Aminopropylamino)-4',5''-dideoxy-4'-propyl paromomycin heptaacetate (10)**

[<sup>13</sup>C-NMR, 150.9 MHz, D<sub>2</sub>O]

OSPT2-RZE-83-salt.4.fid

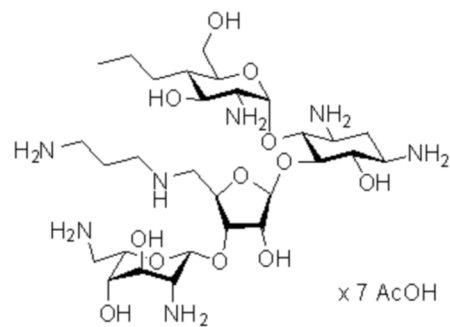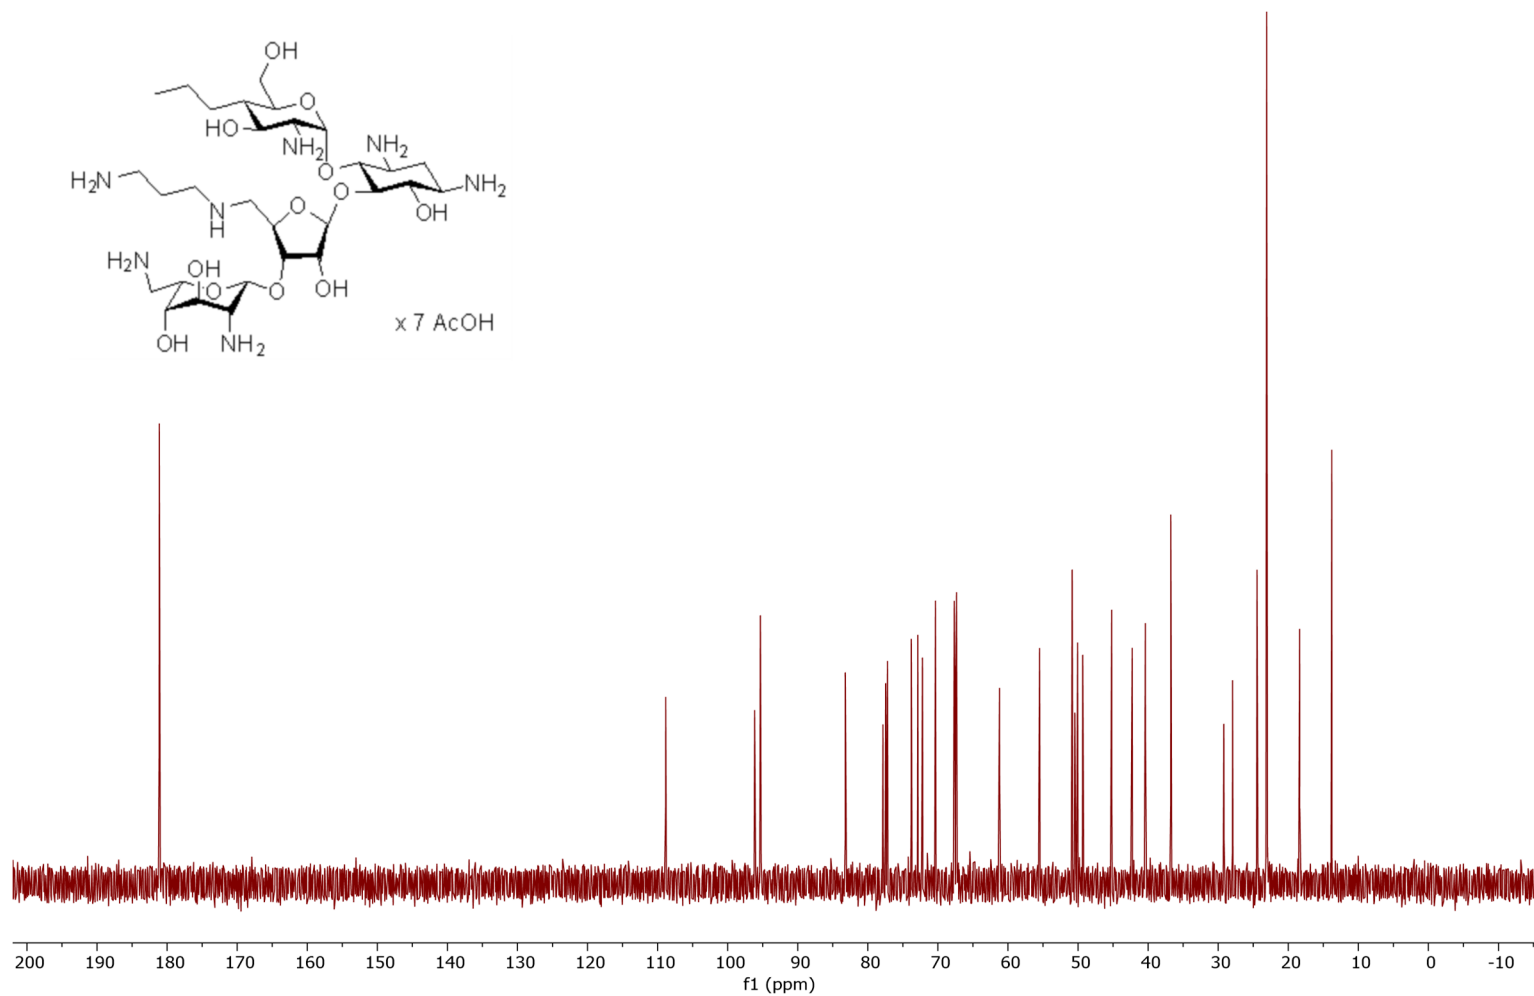

**5''-(3-Aminopropylamino)-4',5''-dideoxy-4'-propyl paromomycin heptaacetate (10)**

[<sup>1</sup>H, <sup>13</sup>C HSQC, 600 MHz, 150.9 MHz, D<sub>2</sub>O]

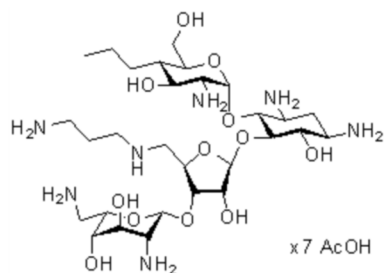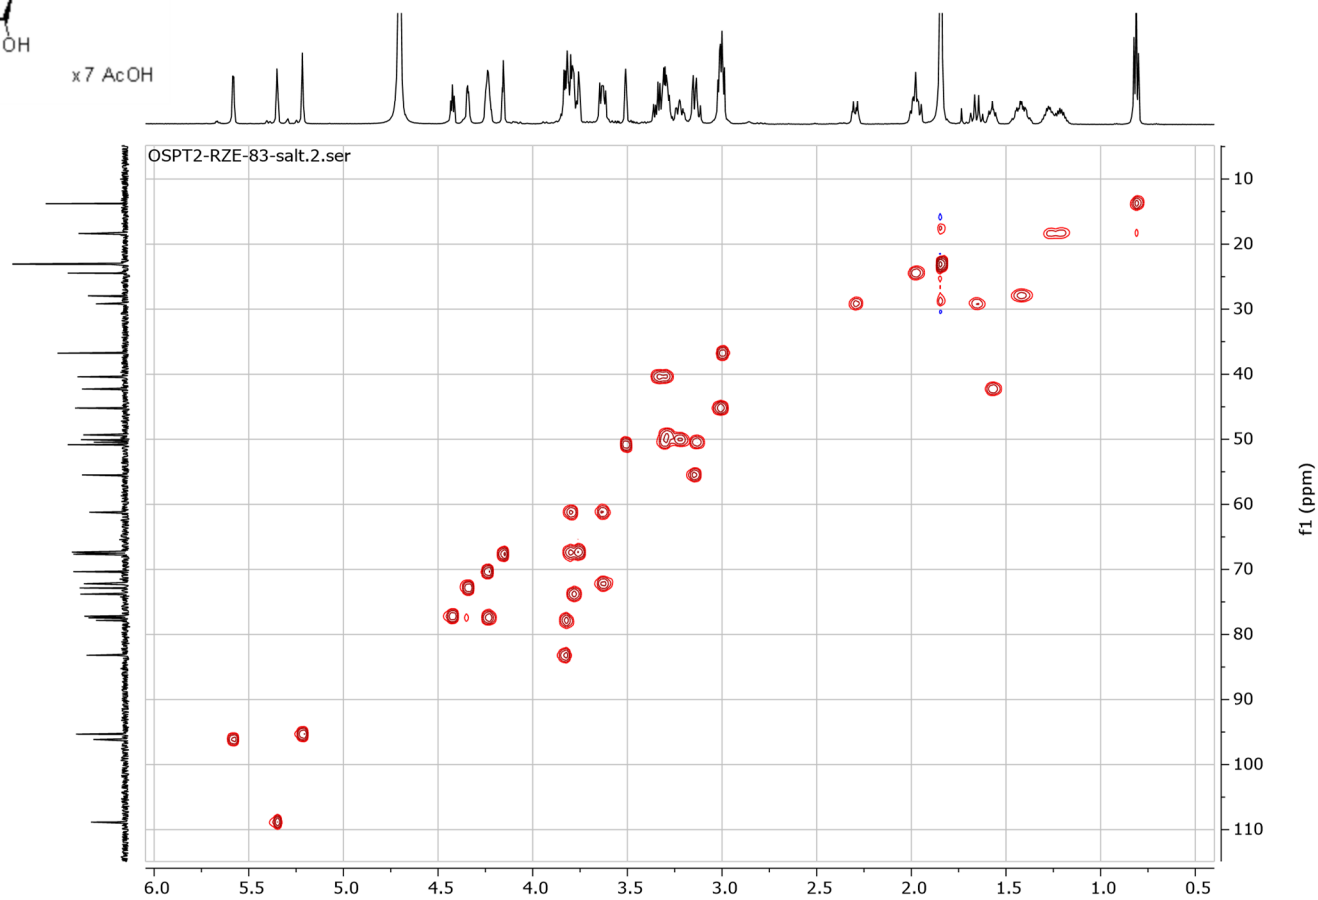

**5''-(3-Aminopropylamino)-4',5''-dideoxy-4'-propyl paromomycin heptaacetate (10)**

[<sup>1</sup>H, <sup>13</sup>C HMBC, 600 MHz, 150.9 MHz, D<sub>2</sub>O]

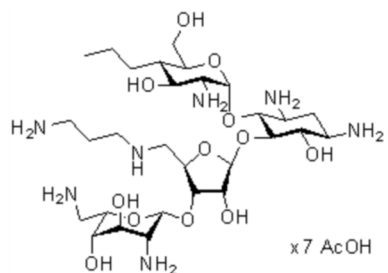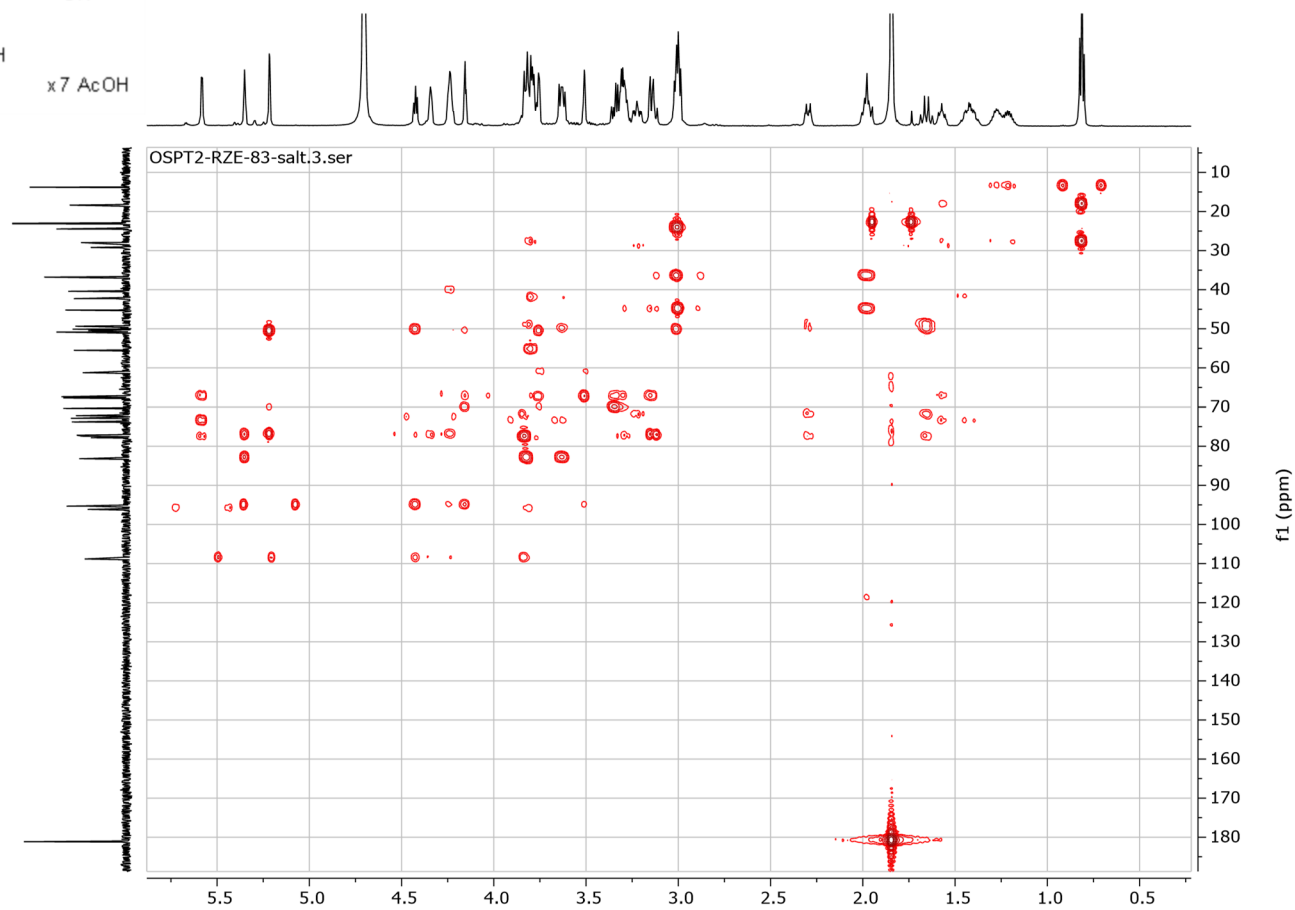

### 5''-(3-Aminopropylamino)-4',5''-dideoxy-4'-propyl paromomycin heptaacetate (10)

Latvijas Organiskās sintēzes institūts  
Fizikāli organiskās ķīmijas laboratorija

**MS: Waters Synapt G2-Si** Capillary, kV: 0.7      **LC: Acquity UPLC H-Class** Column: Acquity UPLC BEH C18  
**ESI+** Cone, V: 40      2.1x50mm, 1.7µm

**Sample:**

HRMS\_2020\_02\_463 1967 Zogota RZE-83  
MS\_POS\_RES\_4min ACN\_Form\_5-98\_040\_4min 1:C,3 5.000000 MS\_Tune Col#66

**Elemental Composition Report:**

Tolerance = 5.0 PPM / DBE: min = -1.5, max = 50.0  
Element prediction: Off  
Number of isotope peaks used for i-FIT = 3

Monoisotopic Mass, Even Electron Ions  
1515 formula(e) evaluated with 5 results within limits (all results (up to 1000) for each mass)  
Elements Used:  
C: 0-50 H: 0-100 N: 0-10 O: 0-20

| Mass     | RA     | Calc. Mass | mDa  | PPM  | DBE | i-FIT | Norm  | Conf(%) | Formula        |
|----------|--------|------------|------|------|-----|-------|-------|---------|----------------|
| 698.4333 | 100.00 | 698.4300   | 3.3  | 4.7  | 3.5 | 465.3 | 0.475 | 62.20   | C29 H60 N7 O12 |
|          |        | 698.4327   | 0.6  | 0.9  | 2.5 | 466.2 | 1.413 | 24.35   | C33 H64 N O14  |
|          |        | 698.4340   | -0.7 | -1.0 | 7.5 | 467.1 | 2.271 | 10.32   | C34 H60 N5 O10 |

**1967 Zogota RZE-83**

HRMS\_2020\_02\_463 89 (0.272) Cm (88:93-(66:73+127:137))

1: TOF MS ES+  
8.35e6

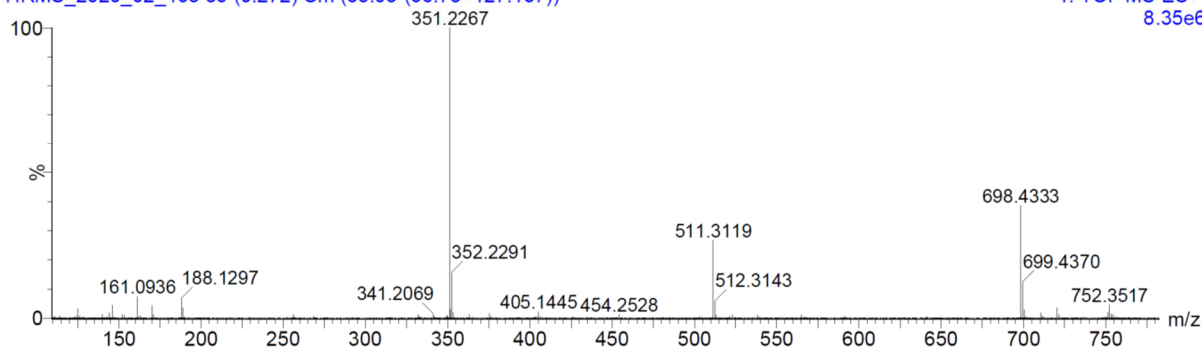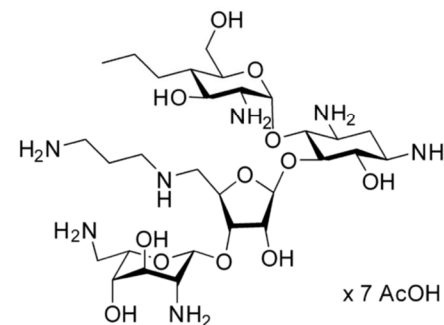

# 4',5''-Dideoxy-5''-formamido-4'-propyl paromomycin pentacetate (11)

[<sup>1</sup>H-NMR, 600 MHz, D<sub>2</sub>O]

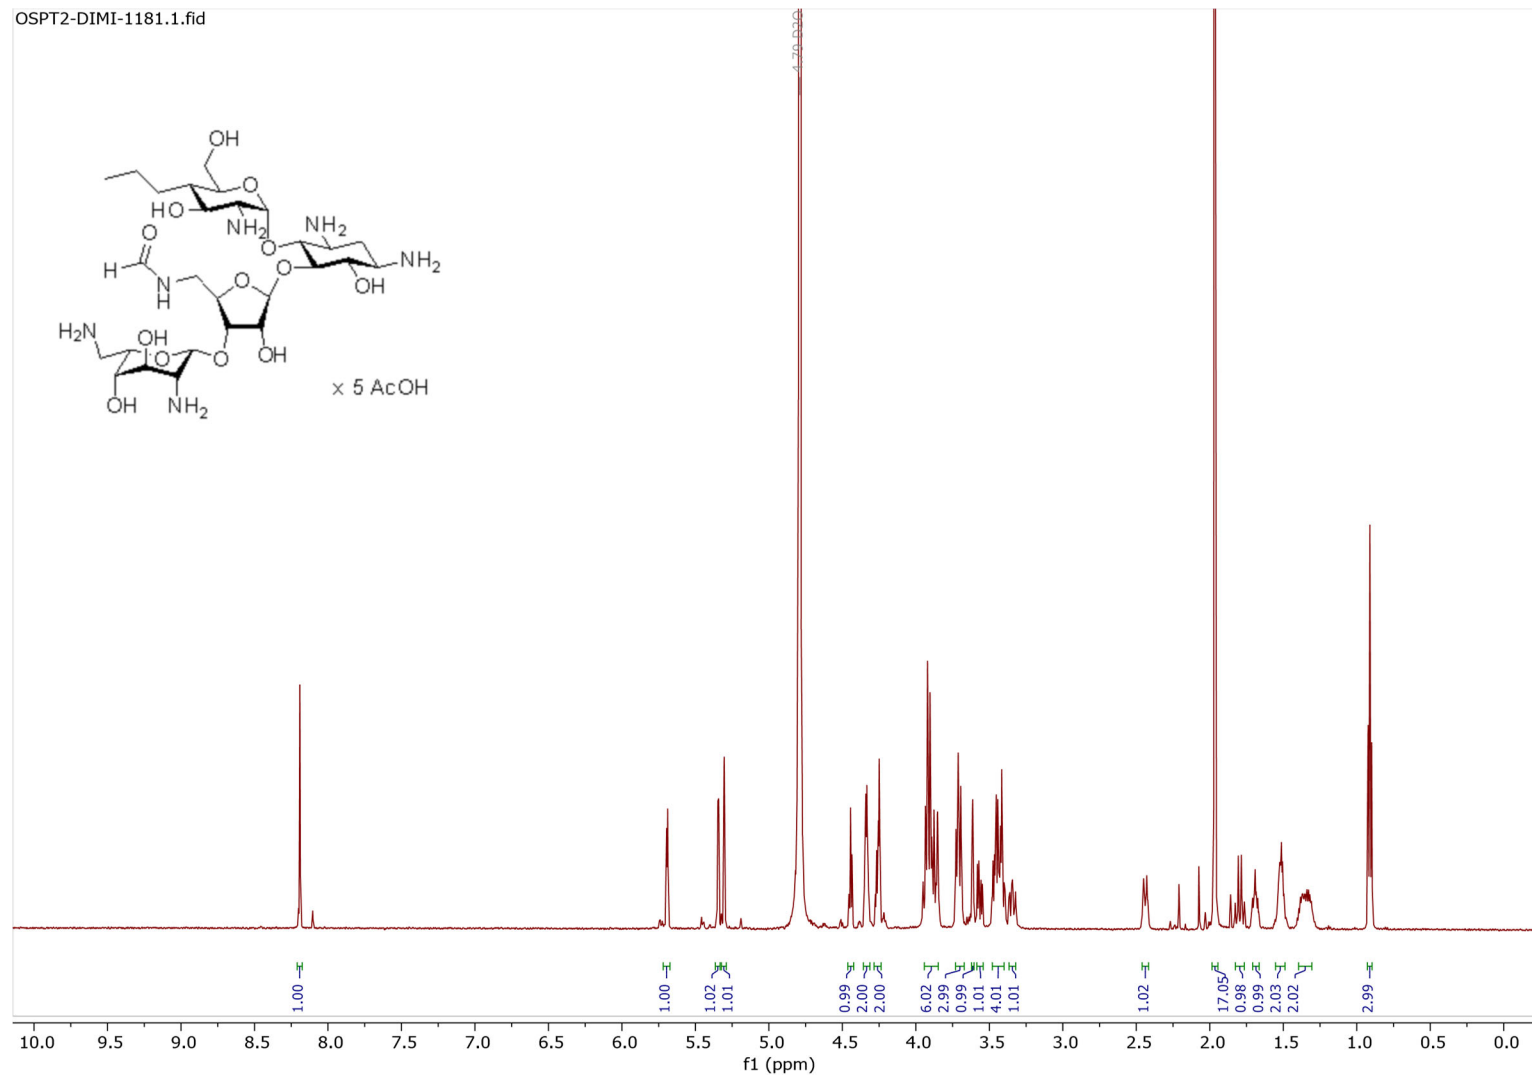

**4',5''-Dideoxy-5''-formamido-4'-propyl paromomycin pentaacetate (11)**

[<sup>13</sup>C-NMR, 150.9 MHz, D<sub>2</sub>O]

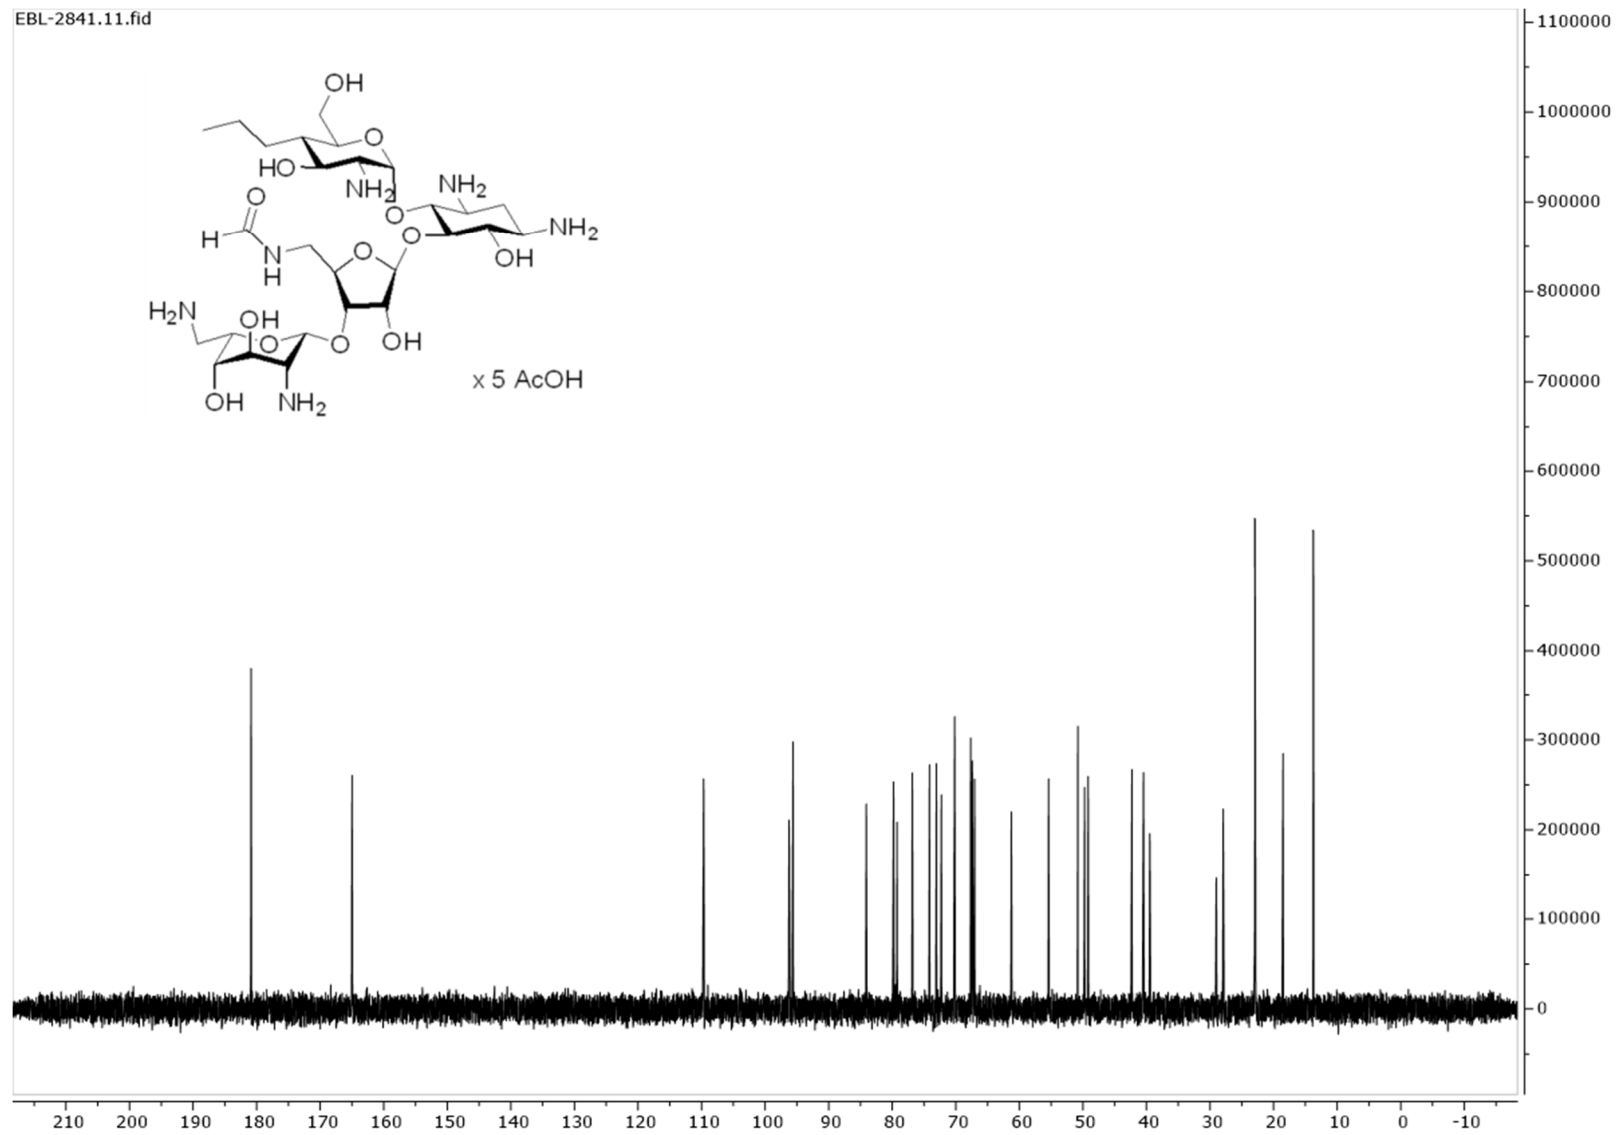

**4',5''-Dideoxy-5''-formamido-4'-propyl paromomycin pentaacetate (11)**

[<sup>1</sup>H, <sup>13</sup>C HSQC, 600 MHz, 150.9 MHz, D<sub>2</sub>O]

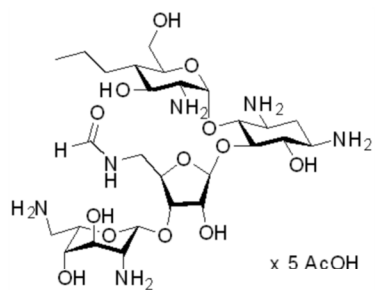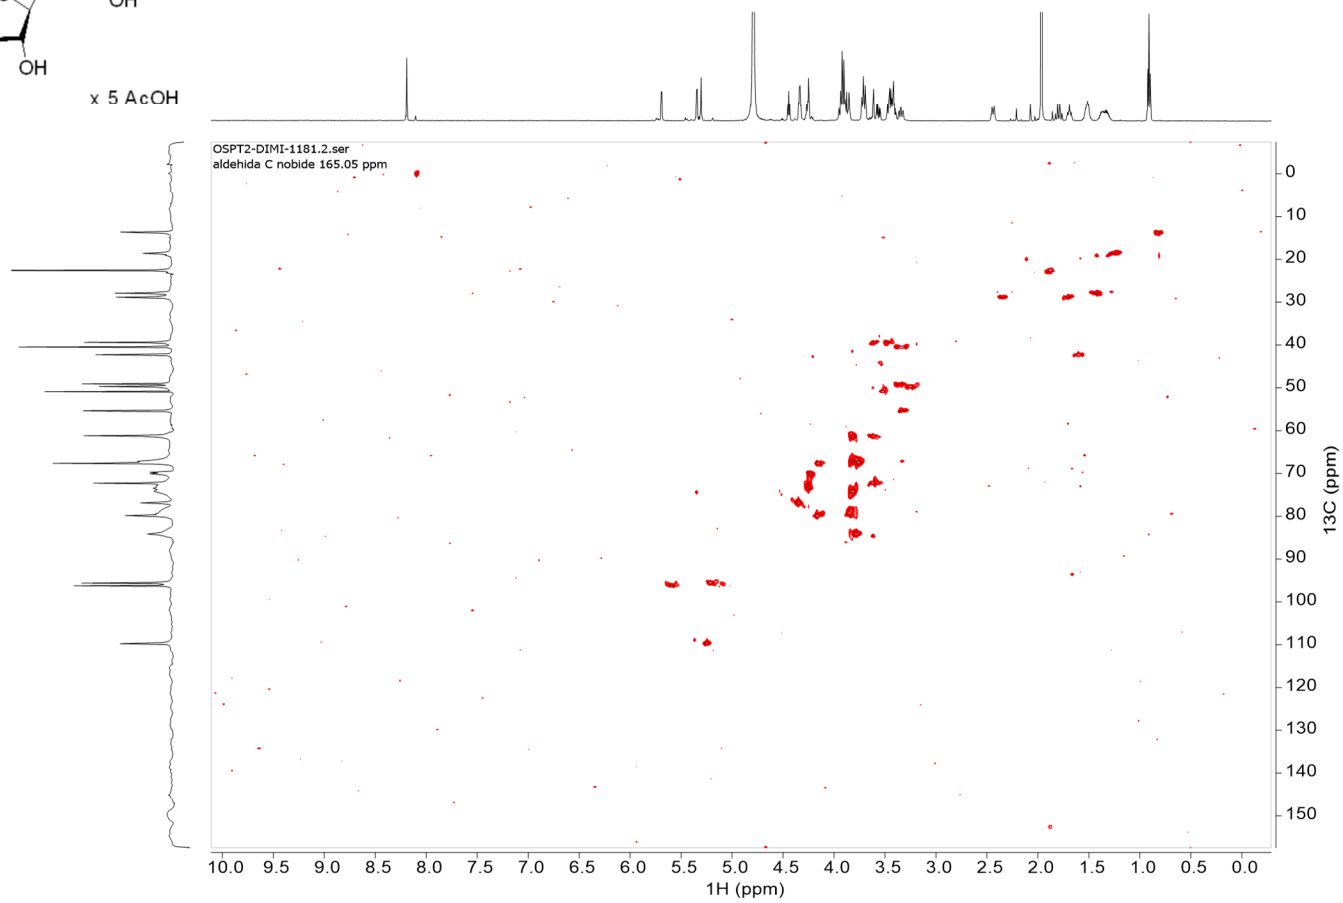

## 4',5''-Dideoxy-5''-formamido-4'-propyl paromomycin pentacetate (11)

Latvijas Organiskās sintēzes institūts  
Fizikāli organiskās ķīmijas laboratorija

**MS: Waters Synapt G2-Si** Capillary, kV: 0.7 **LC: Acquity UPLC H-Class** Column: Acquity UPLC BEH C18  
**ESI+** Cone, V: 40 2.1x50mm, 1.7µm

### Sample:

HRMS\_2019\_06\_033 788 Lubriks DIMI-1181  
MS\_POS\_RES\_4min ACN\_Form\_5-98\_040\_4min 1:C,6 1.000000 MS\_Tune Col#43

### Elemental Composition Report:

Tolerance = 3.0 PPM / DBE: min = -1.5, max = 50.0  
Element prediction: Off  
Number of isotope peaks used for i-FIT = 3

Monoisotopic Mass, Even Electron Ions  
1224 formula(e) evaluated with 4 results within limits (all results (up to 1000) for each mass)  
Elements Used:  
C: 1-100 H: 1-110 N: 0-10 O: 0-15

| Mass     | RA     | Calc. Mass | mDa  | PPM  | DBE  | i-FIT | Norm  | Conf(%) | Formula        |
|----------|--------|------------|------|------|------|-------|-------|---------|----------------|
| 669.3654 | 100.00 | 669.3671   | -1.7 | -2.5 | 4.5  | 271.3 | 0.001 | 99.93   | C27 H53 N6 O13 |
|          |        | 669.3639   | 1.5  | 2.2  | 12.5 | 279.3 | 8.003 | 0.03    | C38 H53 O10    |
|          |        | 669.3652   | 0.2  | 0.3  | 17.5 | 279.7 | 8.324 | 0.02    | C39 H49 N4 O6  |
|          |        | 669.3665   | -1.1 | -1.6 | 22.5 | 280.1 | 8.744 | 0.02    | C40 H45 N8 O2  |

### 788 Lubriks DIMI-1181

HRMS\_2019\_06\_033 146 (0.434) Cm (137:183-(438:473+9:42))

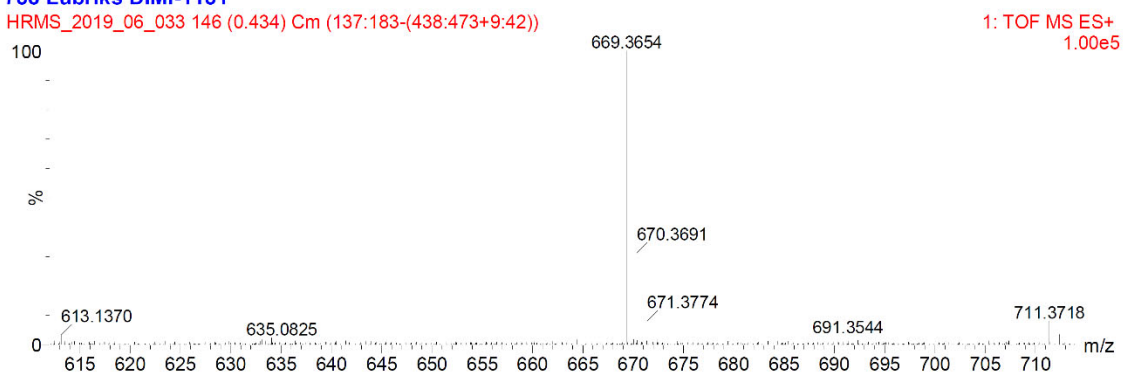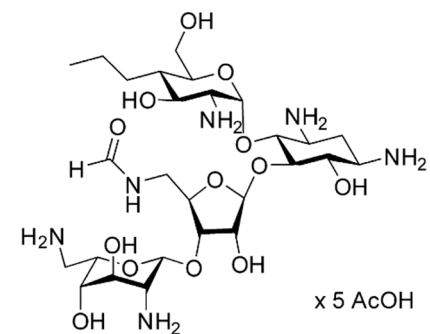



**4',5''-Dideoxy-4'-propyl-5''-ureido-paromomycin pentaacetate (12)**

[<sup>1</sup>H-NMR, 600 MHz, D<sub>2</sub>O]

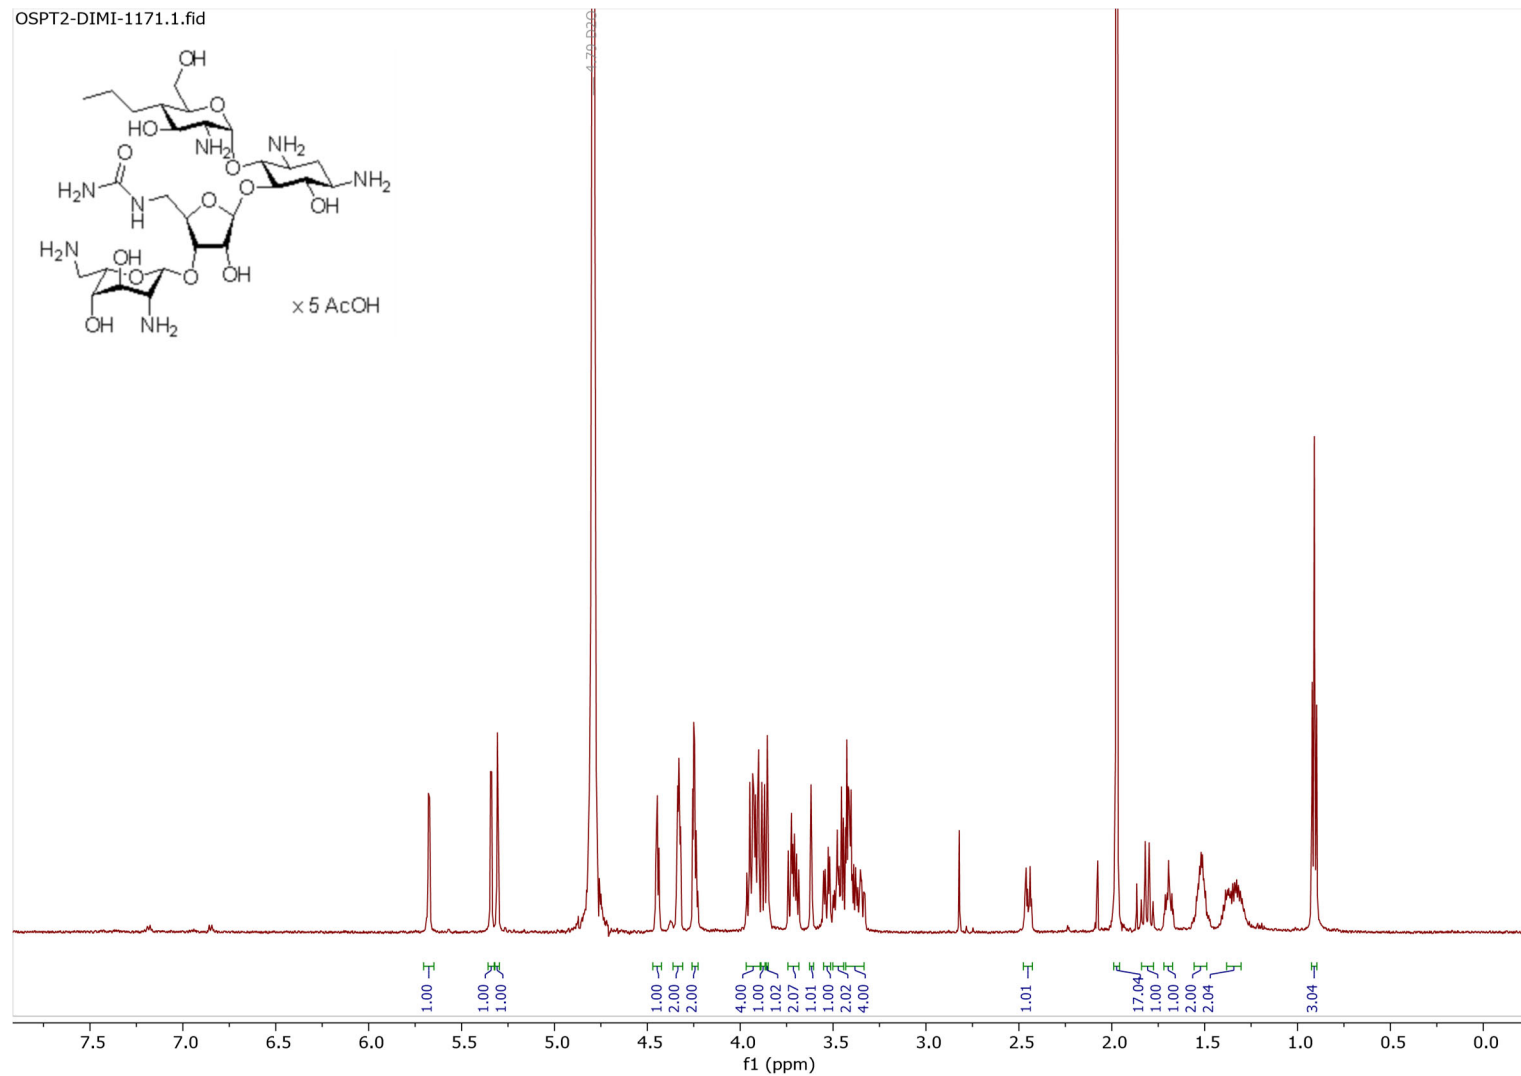

**4',5''-Dideoxy-4'-propyl-5''-ureido-paromomycin pentaacetate (12)**

[<sup>13</sup>C-NMR, 150.9 MHz, D<sub>2</sub>O]

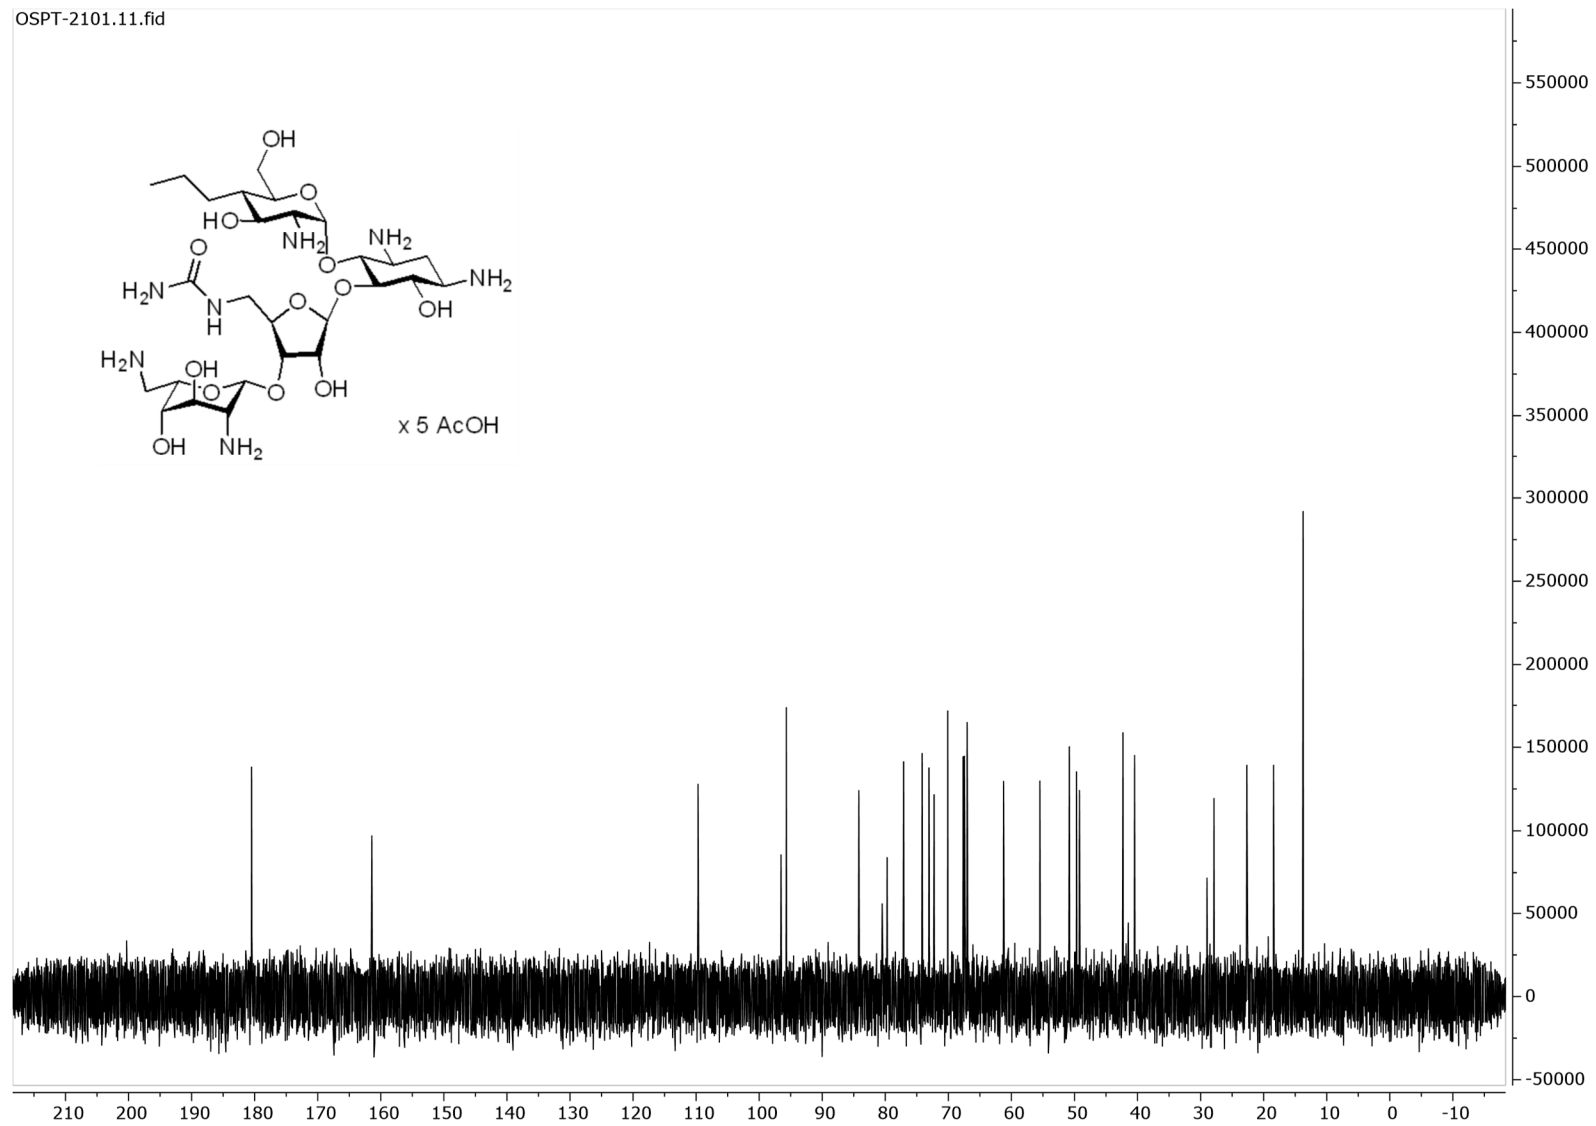

**4',5''-Dideoxy-4'-propyl-5''-ureido-paromomycin pentaacetate (12)**

[<sup>1</sup>H, <sup>13</sup>C HSQC, 600 MHz, 150.9 MHz, D<sub>2</sub>O]

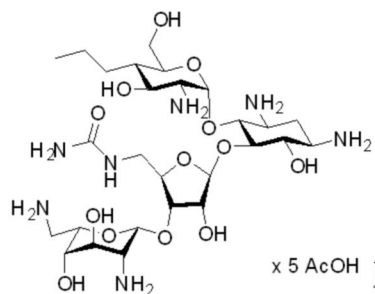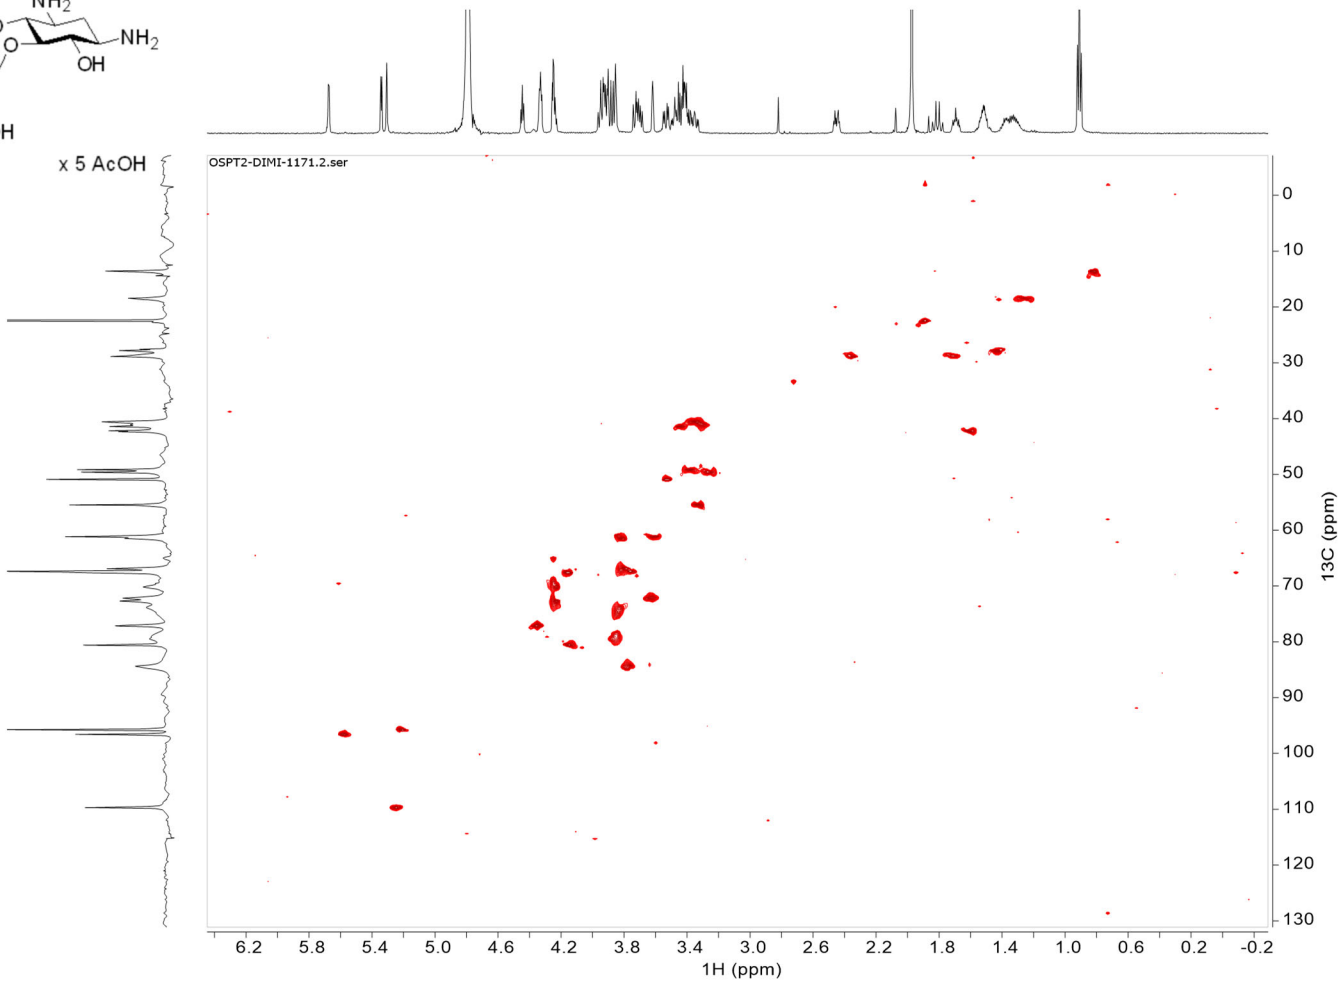

## 4',5''-Dideoxy-4'-propyl-5''-ureido-paromomycin pentaacetate (12)

Latvijas Organiskās sintēzes institūts  
Fizikāli organiskās ķīmijas laboratorija

**MS: Waters Synapt G2-Si** Capillary, kV: 0.7      **LC: Acquity UPLC H-Class** Column: Acquity UPLC BEH C18  
**ESI+** Cone, V: 40      2.1x50mm, 1.7µm

### Sample:

HRMS\_2019\_06\_017 786 Lubriks DIMI-1171  
MS\_POS\_RES\_4min ACN\_Form\_5-98\_040\_4min 2:B,7 5.000000 MS\_Tune Col#43

### Elemental Composition Report:

Tolerance = 5.0 PPM / DBE: min = -1.5, max = 50.0  
Element prediction: Off  
Number of isotope peaks used for i-FIT = 3

Monoisotopic Mass, Even Electron Ions  
1240 formula(e) evaluated with 5 results within limits (up to 3 closest results for each mass)  
Elements Used:  
C: 1-100 H: 1-110 N: 0-10 O: 0-15

| Mass     | RA     | Calc. Mass | mDa  | PPM  | DBE  | i-FIT | Norm  | Conf(%) | Formula        |
|----------|--------|------------|------|------|------|-------|-------|---------|----------------|
| 684.3764 | 100.00 | 684.3780   | -1.6 | -2.3 | 4.5  | 528.4 | 0.001 | 99.89   | C27 H54 N7 O13 |
|          |        | 684.3761   | 0.3  | 0.4  | 17.5 | 535.5 | 7.116 | 0.08    | C39 H50 N5 O6  |
|          |        | 684.3774   | -1.0 | -1.5 | 22.5 | 536.4 | 8.000 | 0.03    | C40 H46 N9 O2  |

### 786 Lubriks DIMI-1171

HRMS\_2019\_06\_017 86 (0.264) Cm (84:93-69:74)

1: TOF MS ES+  
3.02e6

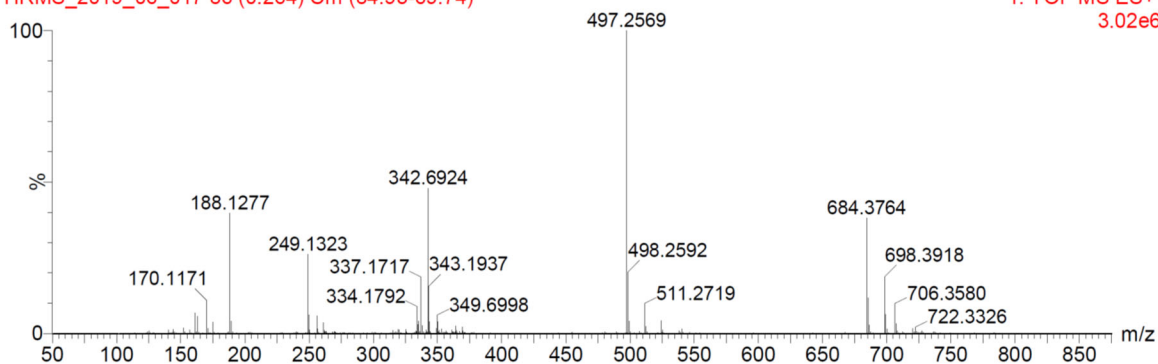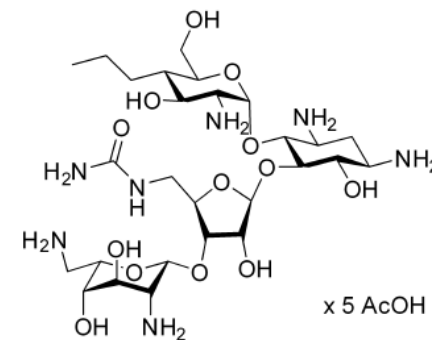

**4',5''-Dideoxy-5''-glycinamido-4'-propyl paromomycin hexacetate (13)**

[<sup>1</sup>H-NMR, 600 MHz, D<sub>2</sub>O]

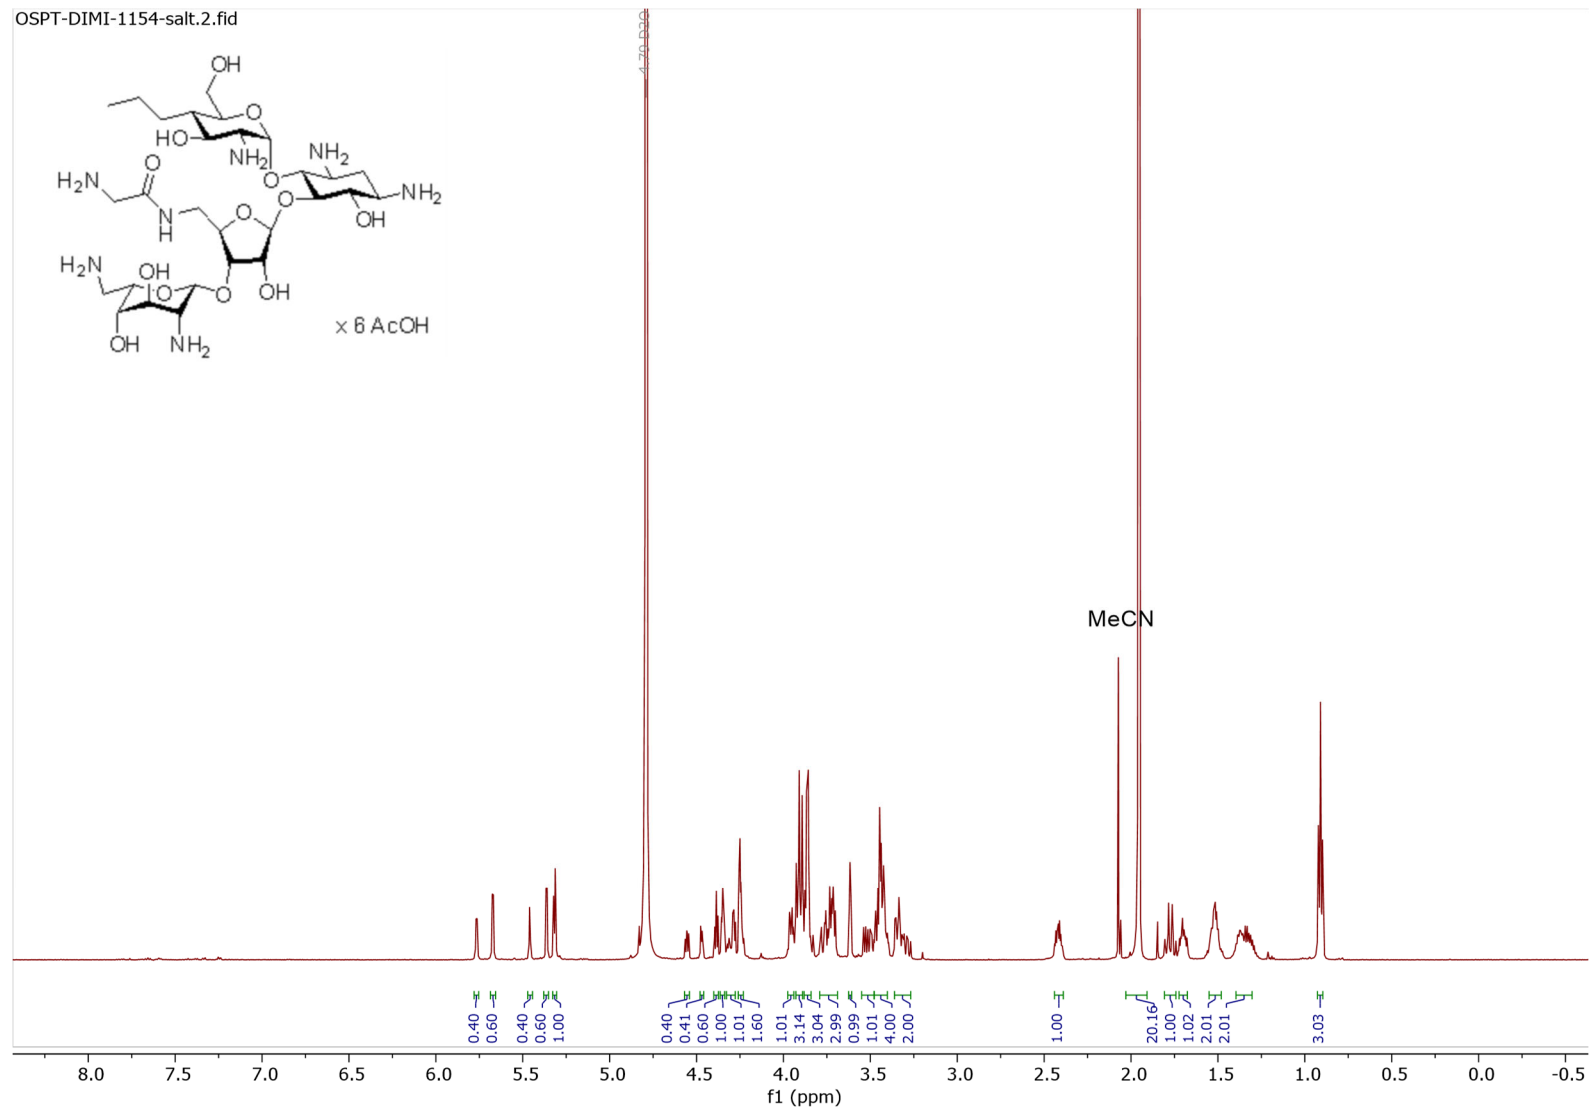

**4',5''-Dideoxy-5''-glycinamido-4'-propyl paromomycin hexacetate (13)**

[<sup>13</sup>C-NMR, 150.9 MHz, D<sub>2</sub>O]

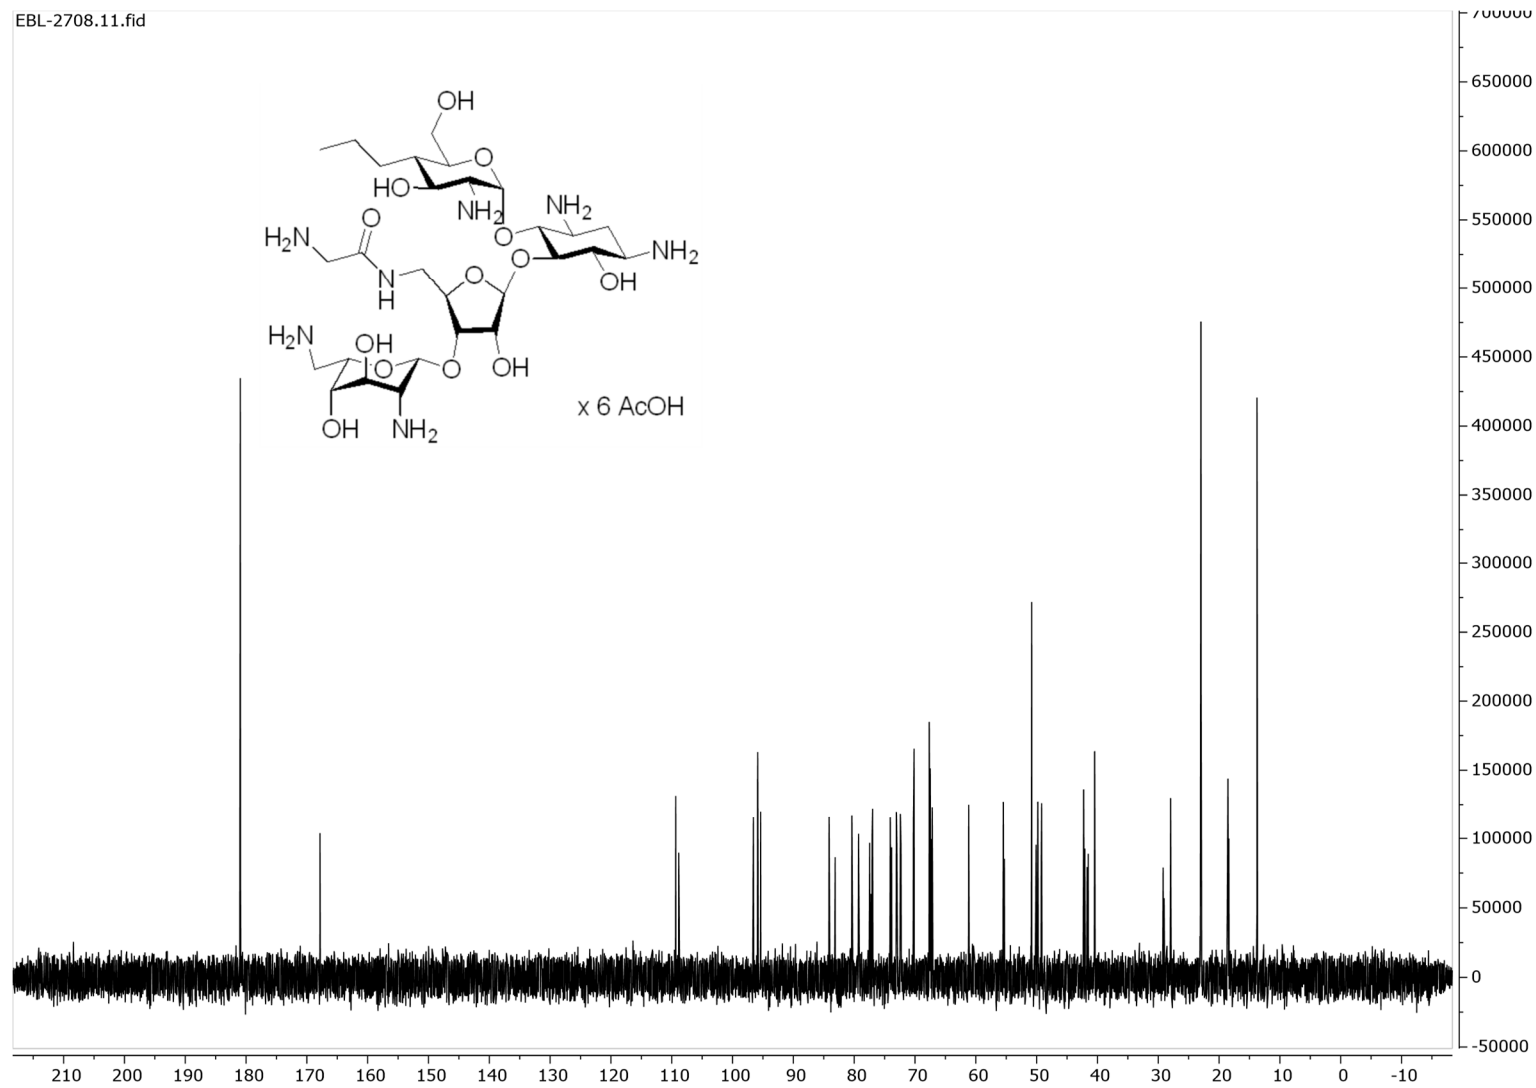

**4',5''-Dideoxy-5''-glycinamido-4'-propyl paromomycin hexacetate (13)**

[<sup>1</sup>H, <sup>13</sup>C HSQC, 600 MHz, 150.9 MHz, D<sub>2</sub>O]

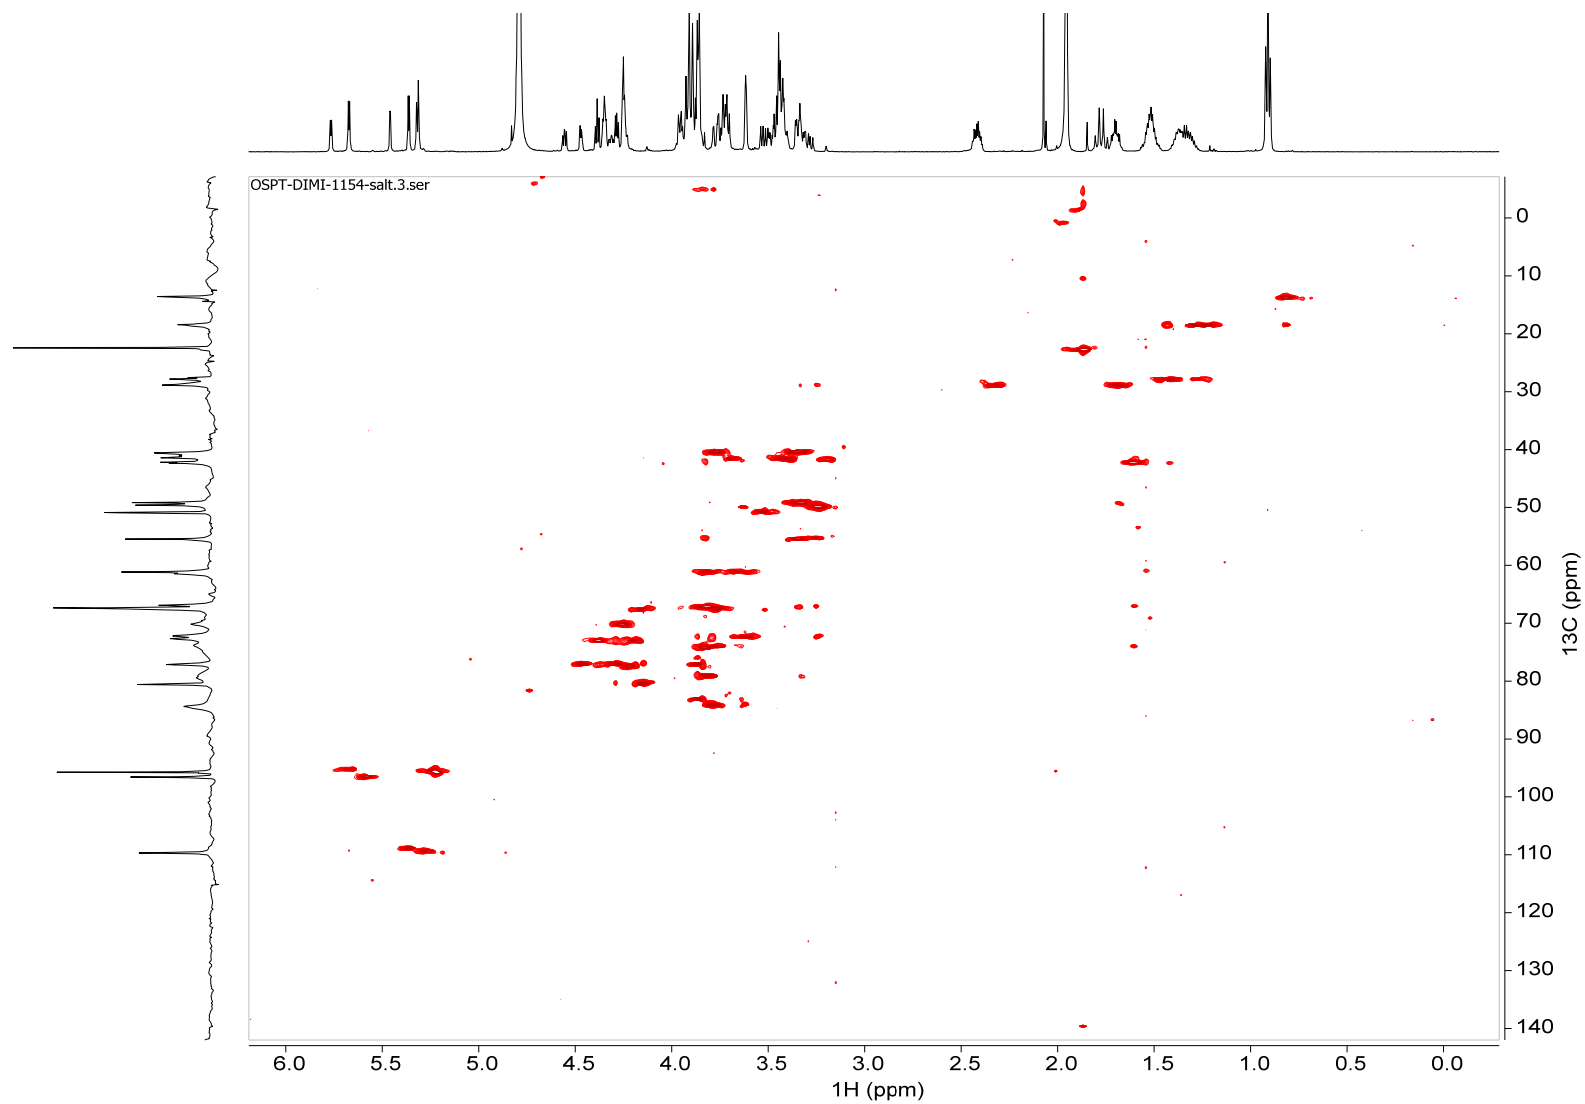

### 4',5''-Dideoxy-5''-glycinamido-4'-propyl paromomycin hexacetate (13)

Latvijas Organiskās sintēzes institūts  
Fizikāli organiskās ķīmijas laboratorija

**MS: Waters Synapt G2-Si** Capillary, kV: 0.7      **LC: Acquity UPLC H-Class** Column: Acquity UPLC BEH C18  
**ESI+** Cone, V: 40      2.1x50mm, 1.7μm

**Sample:**

HRMS\_2019\_04\_226 623 DIMI-1154  
MS\_POS\_RES\_4min ACN\_Form\_5-98\_040\_4min MS\_Tune 1:E,6 0.300000 Col#43

Elemental Composition Report:

Tolerance = 2.0 PPM / DBE: min = -1.5, max = 50.0  
Element prediction: Off  
Number of isotope peaks used for i-FIT = 3

Monoisotopic Mass, Even Electron Ions  
5251 formula(e) evaluated with 7 results within limits (all results (up to 1000) for each mass)  
Elements Used:  
C: 1-100 H: 1-110 N: 0-50 O: 0-50

| Mass     | RA     | Calc. Mass | mDa  | PPM  | DBE  | i-FIT | Norm  | Conf(%) | Formula         |
|----------|--------|------------|------|------|------|-------|-------|---------|-----------------|
| 698.3942 | 100.00 | 698.3936   | 0.6  | 0.9  | 4.5  | 745.2 | 0.194 | 82.40   | C28 H56 N7 O13  |
|          |        | 698.3949   | -0.7 | -1.0 | 9.5  | 747.1 | 2.128 | 11.91   | C29 H52 N11 O9  |
|          |        | 698.3936   | 0.6  | 0.9  | 15.5 | 747.9 | 2.918 | 5.40    | C26 H44 N21 O3  |
|          |        | 698.3954   | -1.2 | -1.7 | 2.5  | 751.0 | 6.036 | 0.24    | C14 H48 N23 O10 |
|          |        | 698.3931   | 1.1  | 1.6  | 22.5 | 752.7 | 7.779 | 0.04    | C41 H48 N9 O2   |

**623 DIMI-1154**

HRMS\_2019\_04\_226 83 (0.255) Cm (83:90)

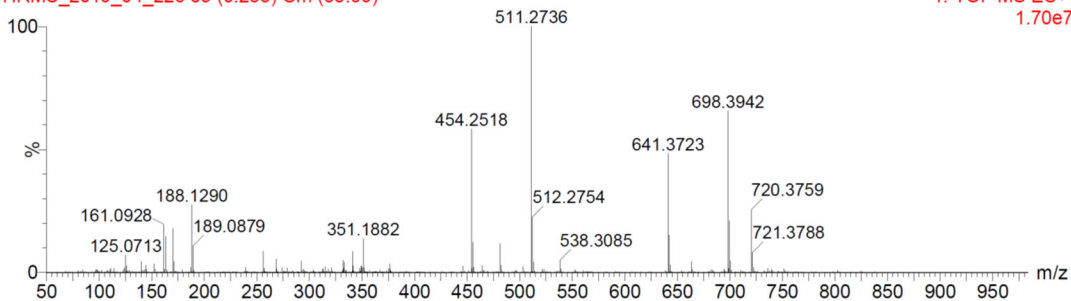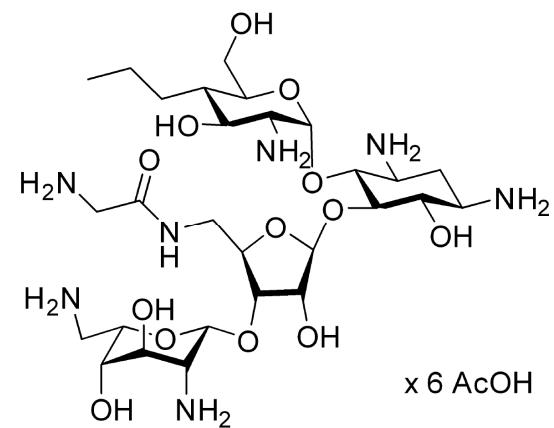



Phenyl 2-azido-2,3,4-trideoxy-4-C-ethyl-1-thio-β-D-glucopyranoside (43)

<sup>1</sup>H NMR (500 MHz, CDCl<sub>3</sub>)

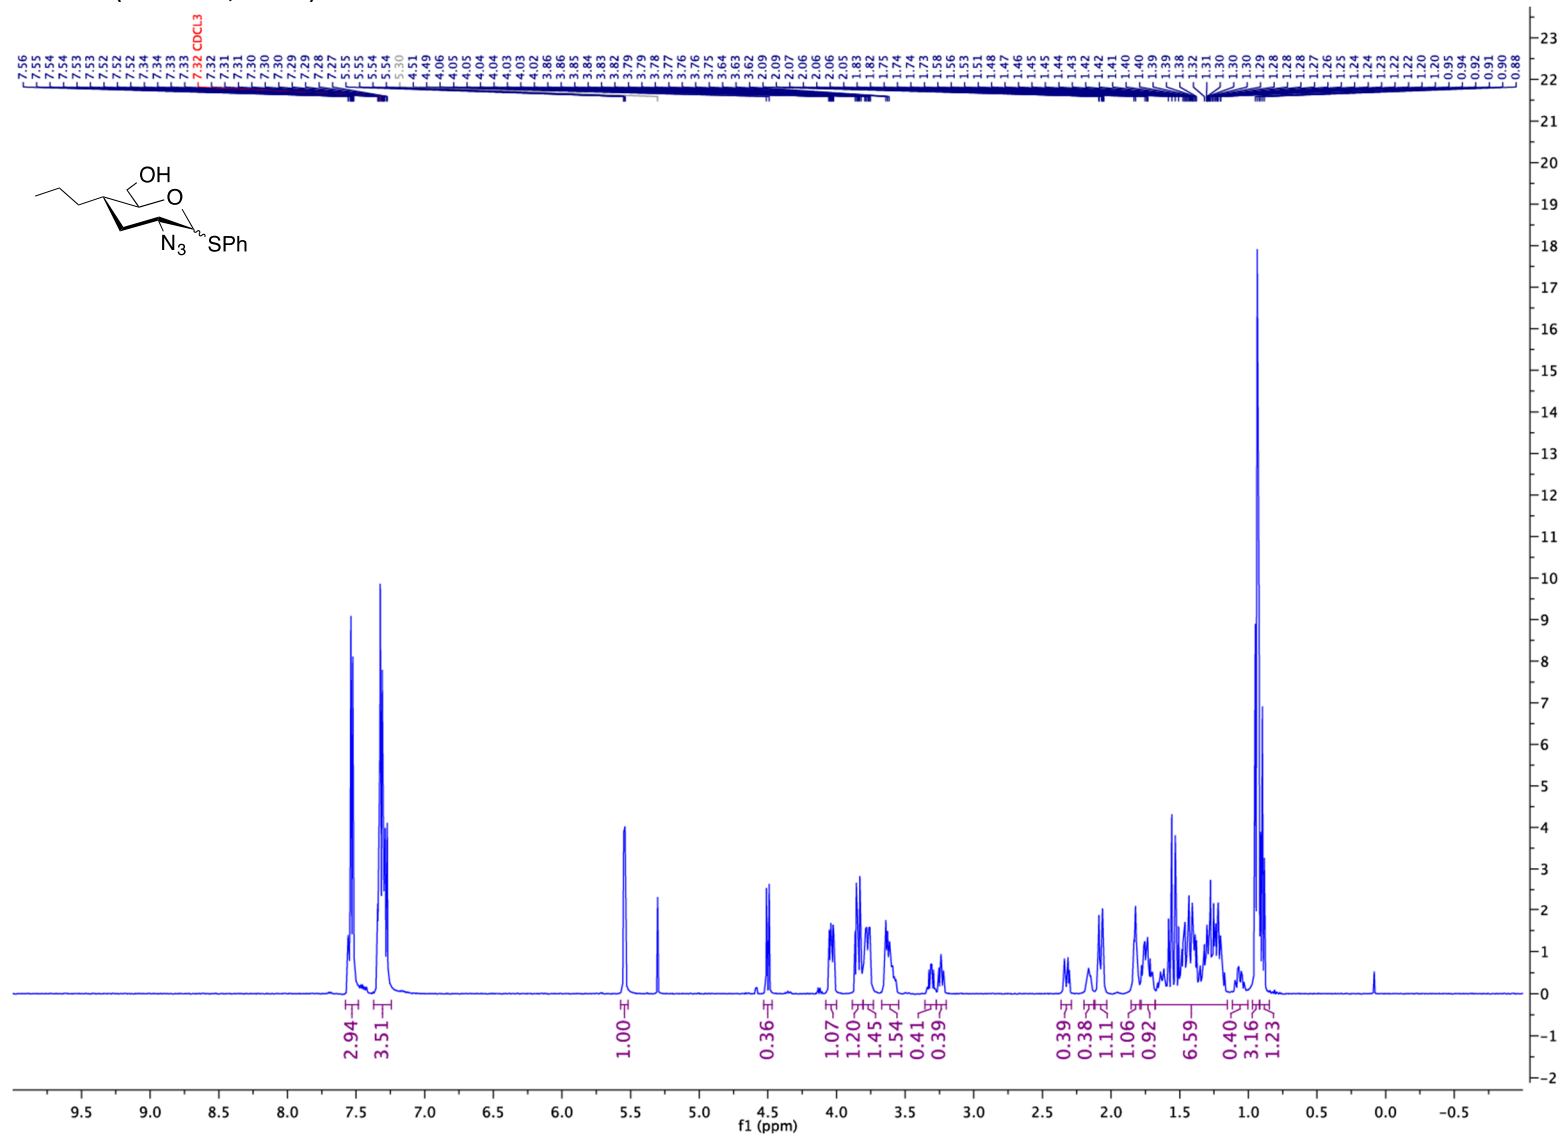

Phenyl 2-azido-2,3,4-trideoxy-4-C-ethyl-1-thio-β-D-glucopyranoside (43)

[<sup>13</sup>C-NMR, 125 MHz, D<sub>2</sub>O]

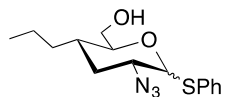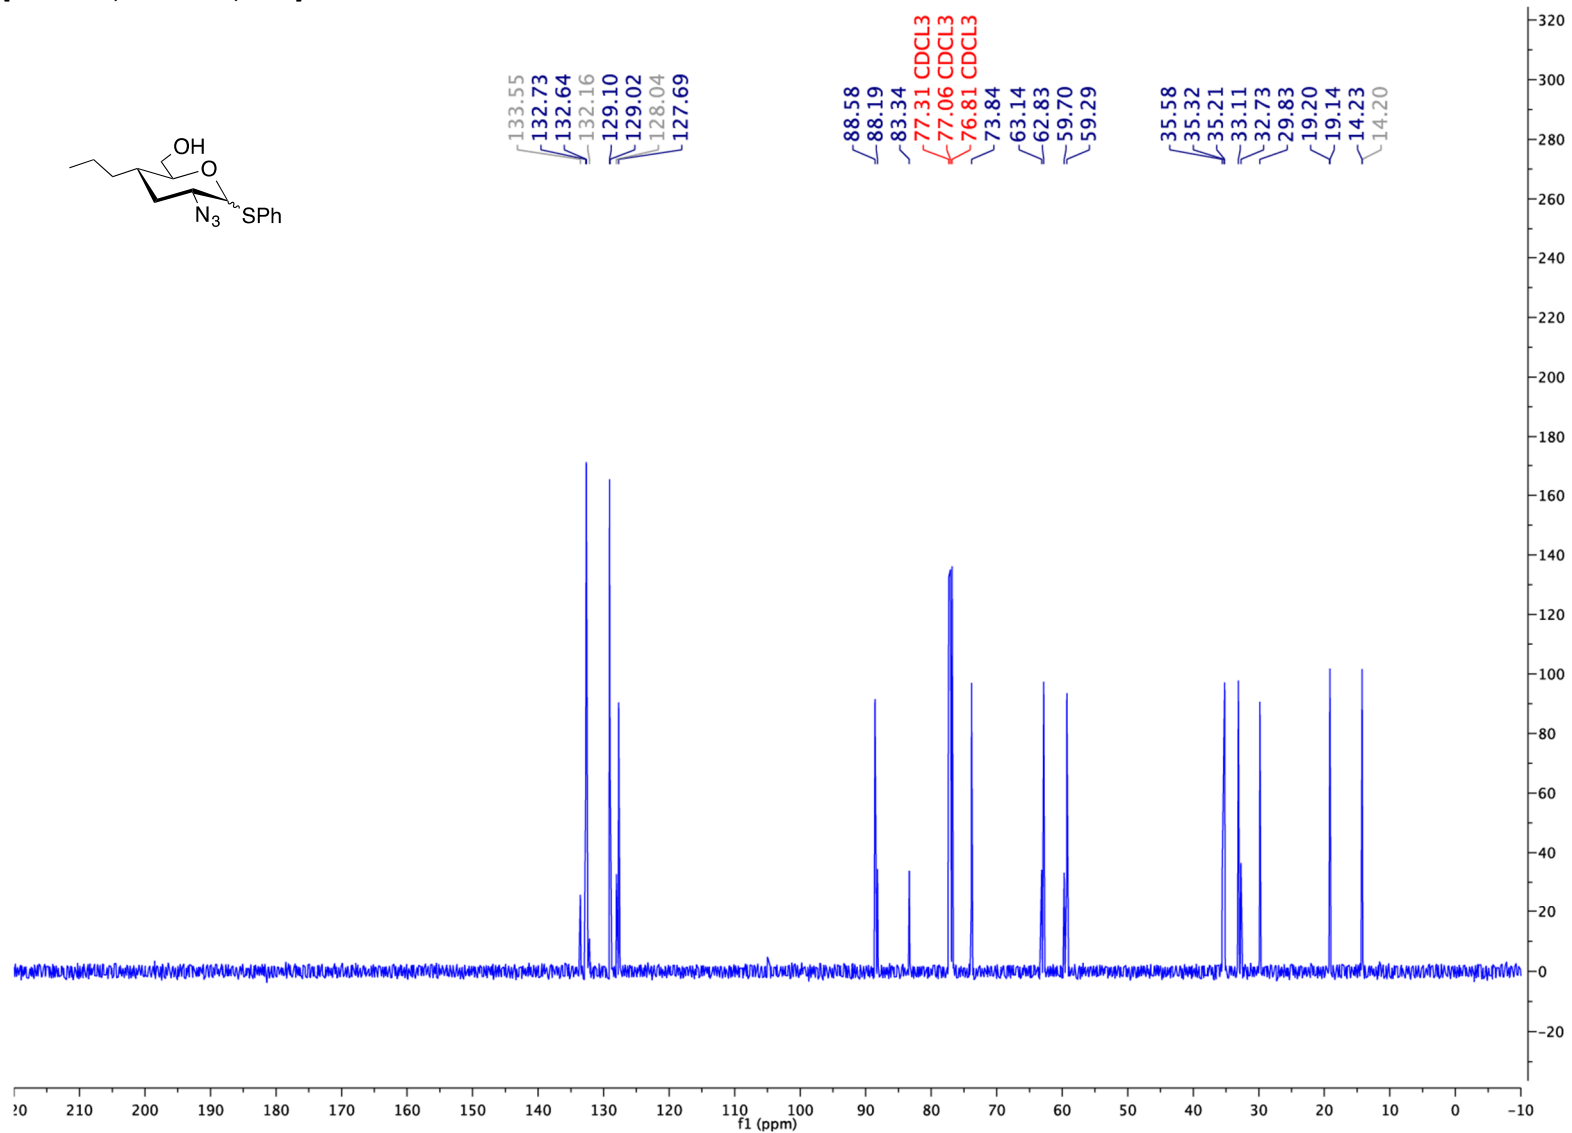

Phenyl 6-O-acetyl-2-azido-2,3,4-trideoxy-4-C-ethyl-1-thio-β-D-glucopyranoside (44)

<sup>1</sup>H NMR (500 MHz, CDCl<sub>3</sub>)

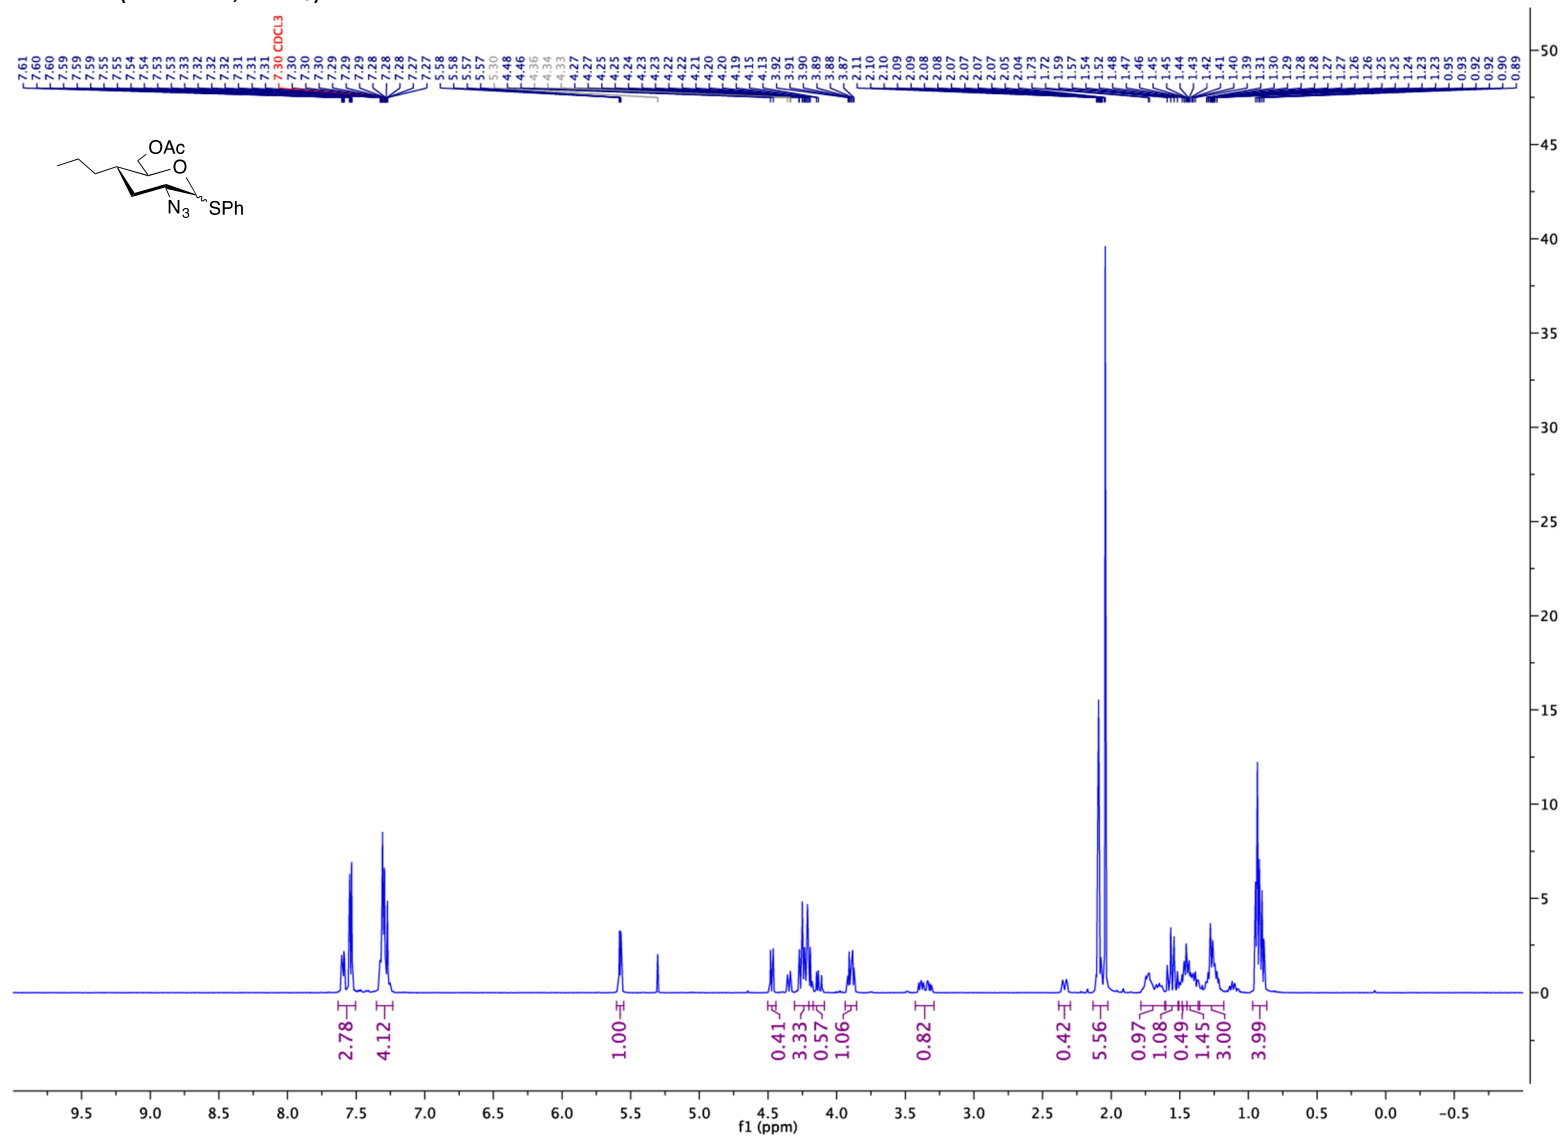

Phenyl 6-O-acetyl-2-azido-2,3,4-trideoxy-4-C-ethyl-1-thio-β-D-glucopyranoside (44)

[<sup>13</sup>C-NMR, 125 MHz, CDCl<sub>3</sub>]

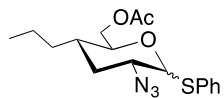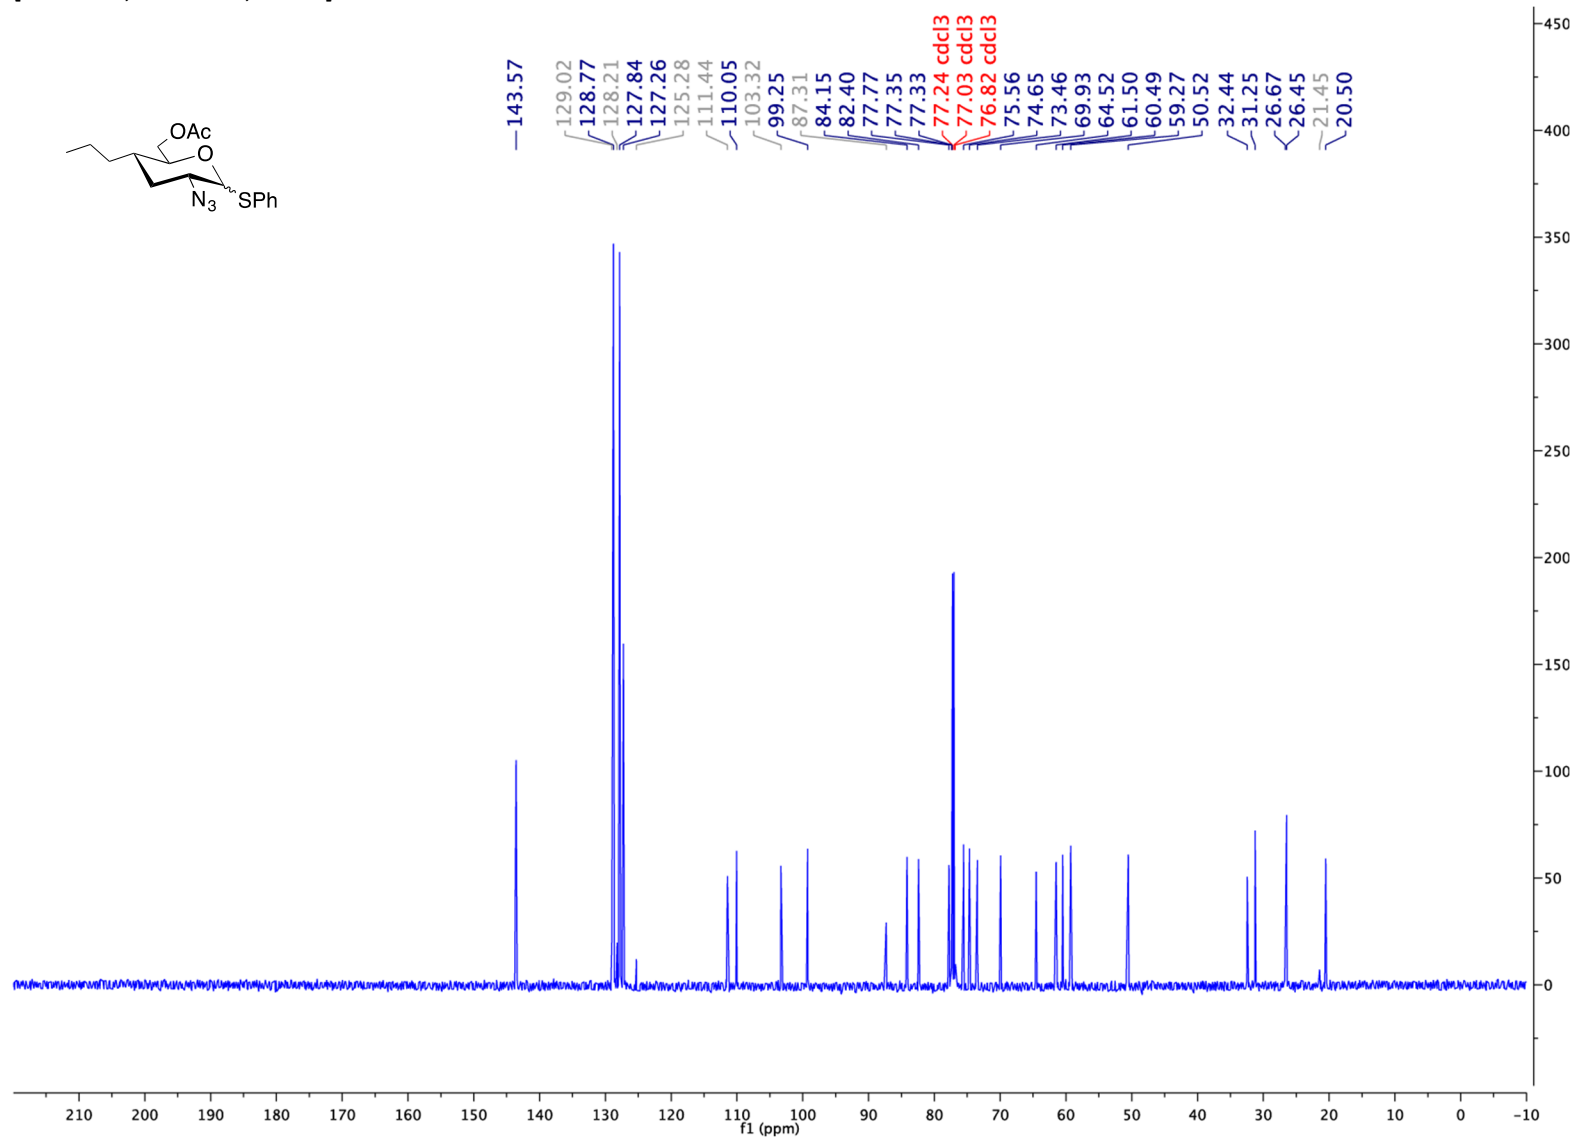

# Phenyl 6-O-acetyl-2-azido-2,3,4-trideoxy-4-C-ethyl-1-thio-β-D-glucopyranoside (44)

D:\January 2021\VAS-104-1.raw

1/9/2021 11:04:08 AM

RT :0.00-1.02

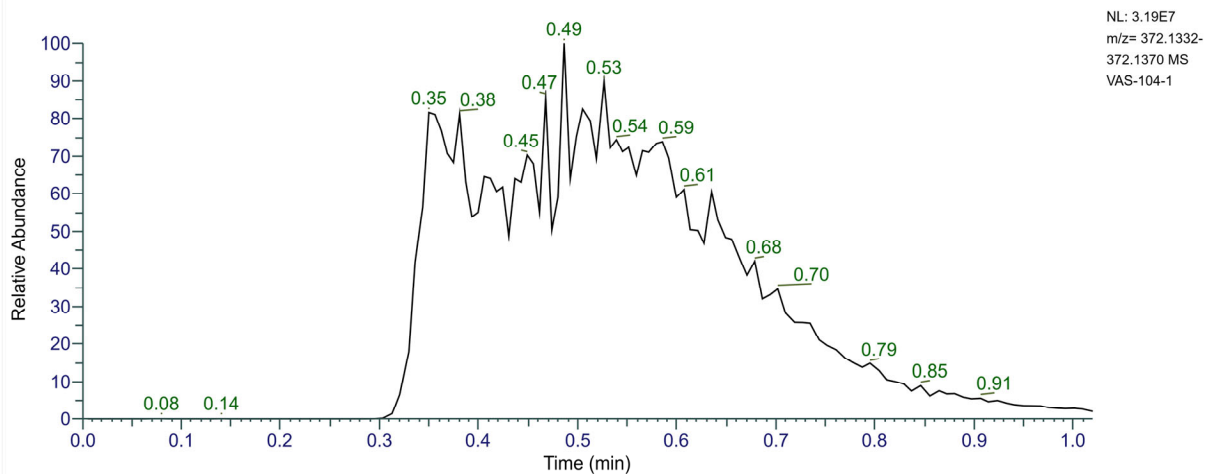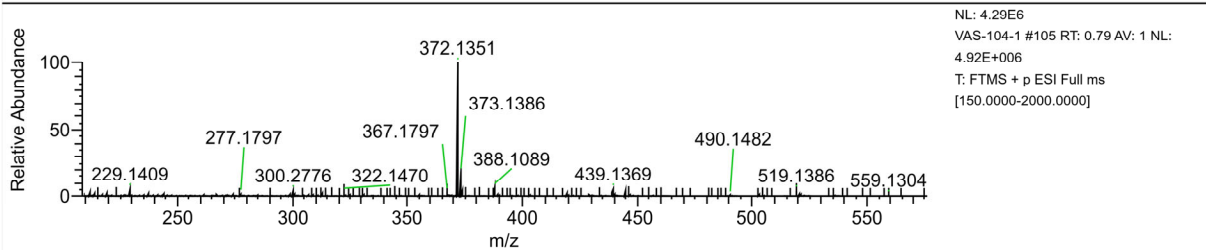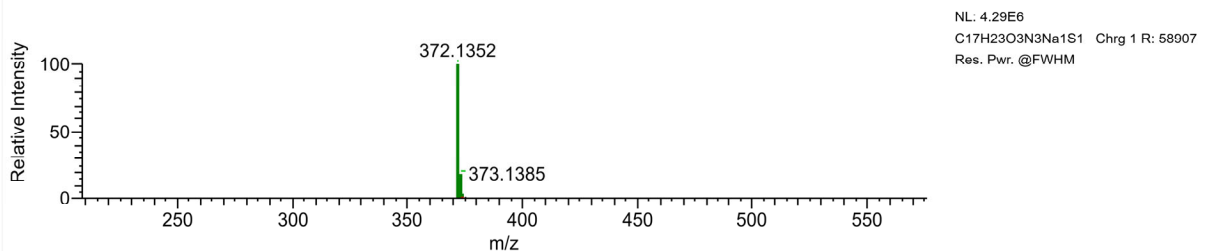

| Peak Mass | Delta [ppm] | Display Formula                                                                                | Theo. mass | MSMS Matched Fragments |
|-----------|-------------|------------------------------------------------------------------------------------------------|------------|------------------------|
| 372.1351  | -0.36       | C <sub>17</sub> H <sub>23</sub> O <sub>3</sub> N <sub>3</sub> <sup>23</sup> Na <sup>32</sup> S | 372.13523  | (Collection)           |

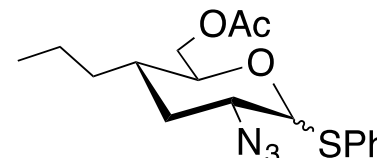

# Phenyl 6-O-acetyl-2,3,4-trideoxy-4-C-ethyl-1-thio-β-D-glucopyranosyl sulfoxide (45)

<sup>1</sup>H NMR (500 MHz, CDCl<sub>3</sub>)

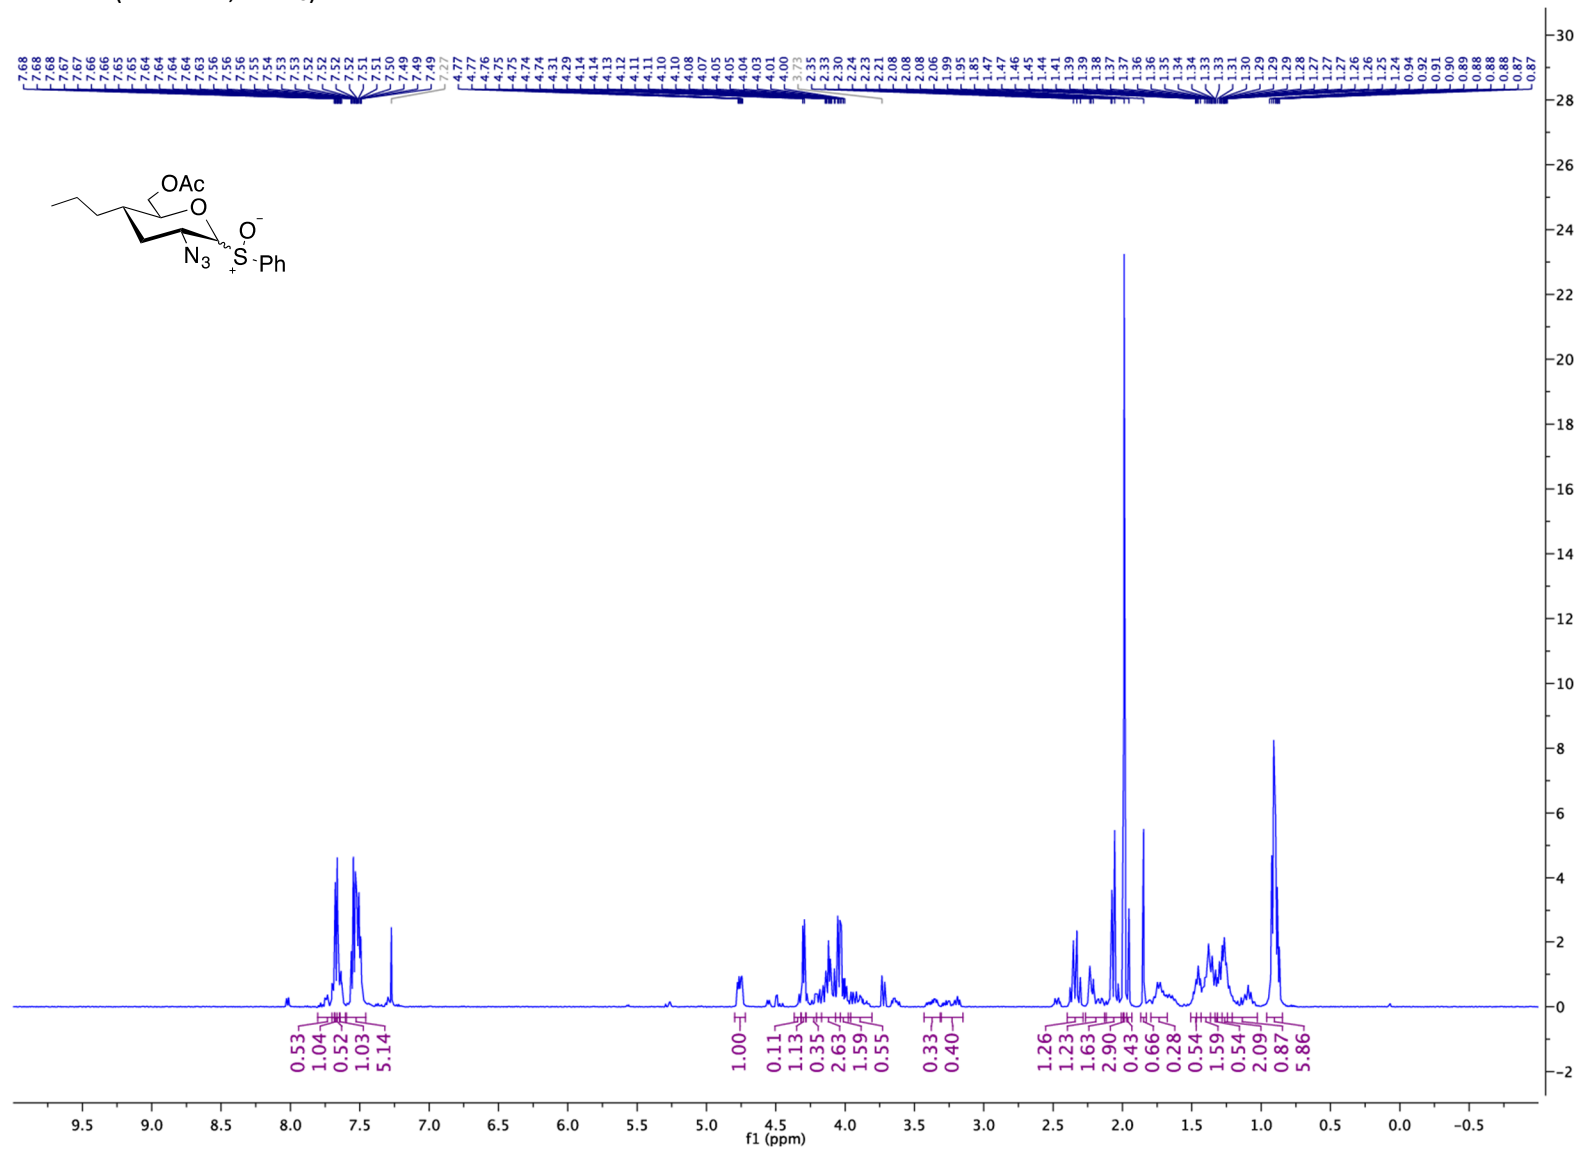

Phenyl 6-O-acetyl-2-azido-2,3,4-trideoxy-4-C-ethyl-1-thio-β-D-glucopyranosyl sulfoxide (45)

[<sup>13</sup>C-NMR, 125 MHz, D<sub>2</sub>O]

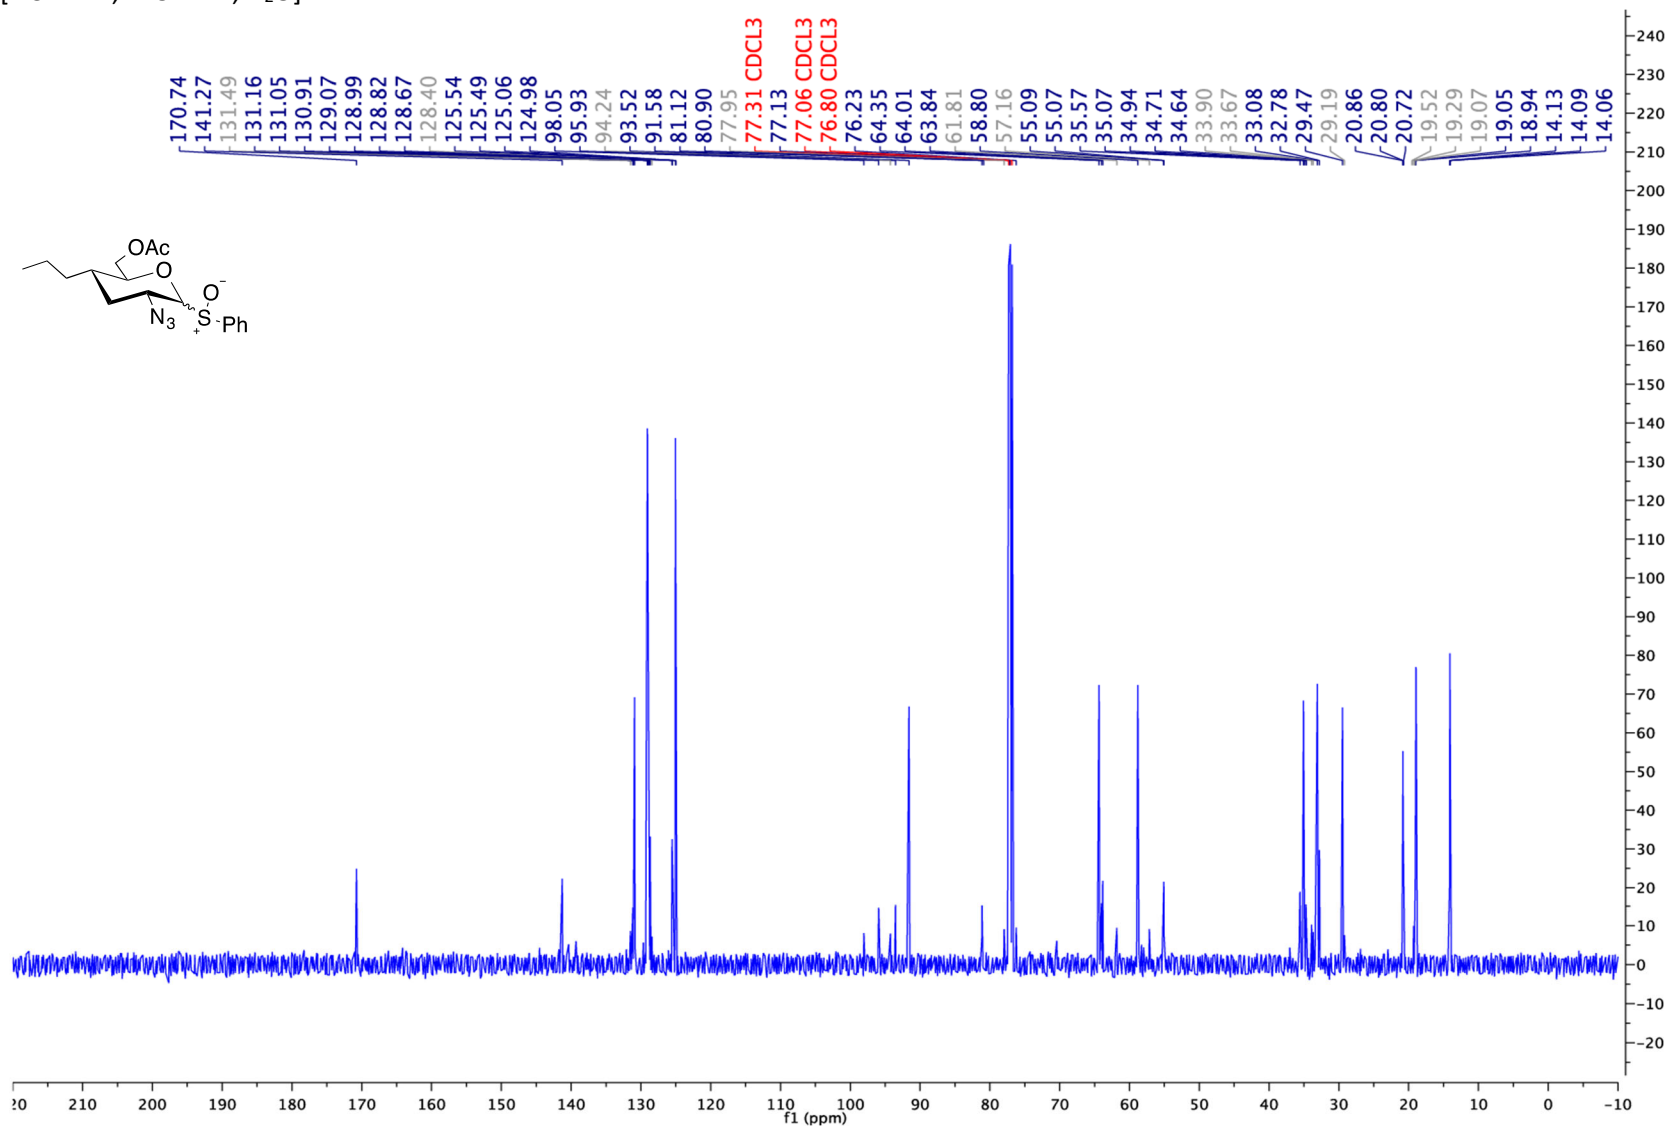

# Phenyl 6-O-acetyl-2-azido-2,3,4-trideoxy-4-C-ethyl-1-thio-β-D-glucopyranosyl sulfoxide (45)

D:\January 2021\VAS-510-sfx-2.raw

1/11/2021 5:00:24 PM

RT :0.00-1.02

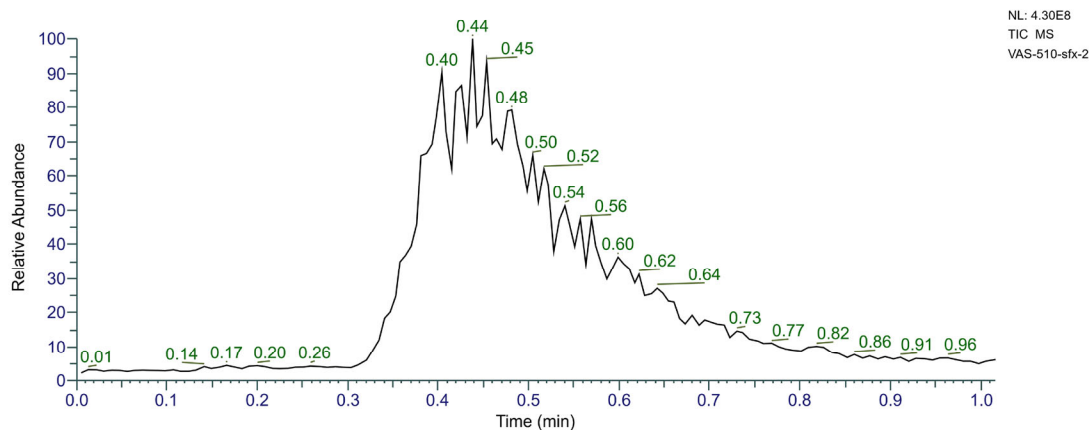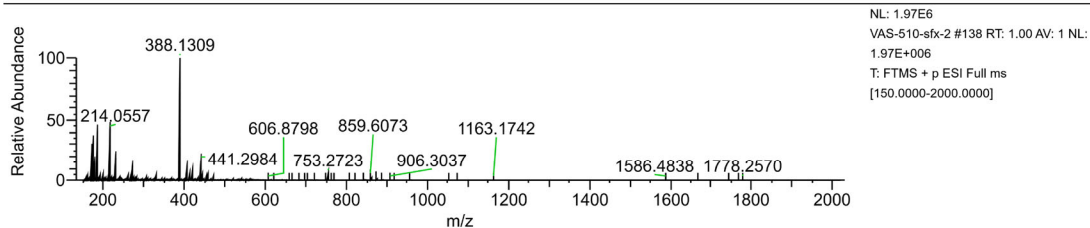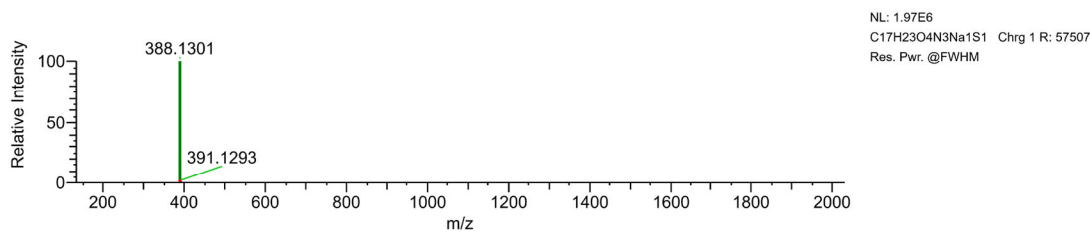

| Peak Mass | Delta [ppm] | Display Formula                                                                                | Theo. mass | MSMS Matched Fragments |
|-----------|-------------|------------------------------------------------------------------------------------------------|------------|------------------------|
| 388.1309  | 1.99        | C <sub>17</sub> H <sub>23</sub> O <sub>4</sub> N <sub>3</sub> <sup>23</sup> Na <sup>32</sup> S | 388.13015  | (Collection)           |
| 388.1309  | -4.21       | C <sub>19</sub> H <sub>22</sub> O <sub>4</sub> N <sub>3</sub> <sup>32</sup> S                  | 388.13255  | (Collection)           |
| 388.1309  | 3.92        | C <sub>15</sub> H <sub>26</sub> ON <sub>5</sub> <sup>32</sup> S <sub>3</sub>                   | 388.12940  | (Collection)           |
| 388.1309  | 0.31        | C <sub>25</sub> H <sub>19</sub> O <sub>2</sub> N <sup>23</sup> Na                              | 388.13080  | (Collection)           |
| 388.1309  | 4.48        | C <sub>22</sub> H <sub>18</sub> O <sub>4</sub> N <sub>3</sub>                                  | 388.12918  | (Collection)           |

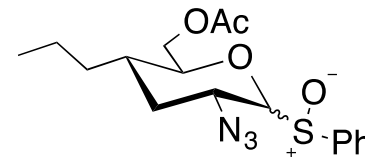



**1,3,2',3',4',2''',6'''-Heptadeoxy-4'-propyl-6'-acetyl-1,3,2',2''',6'''-pentaazido-6,2'',5'',3''',4'''-penta-O-benzyl paromomycin (47)**

[<sup>1</sup>H-NMR, 600 MHz, CDCl<sub>3</sub>]

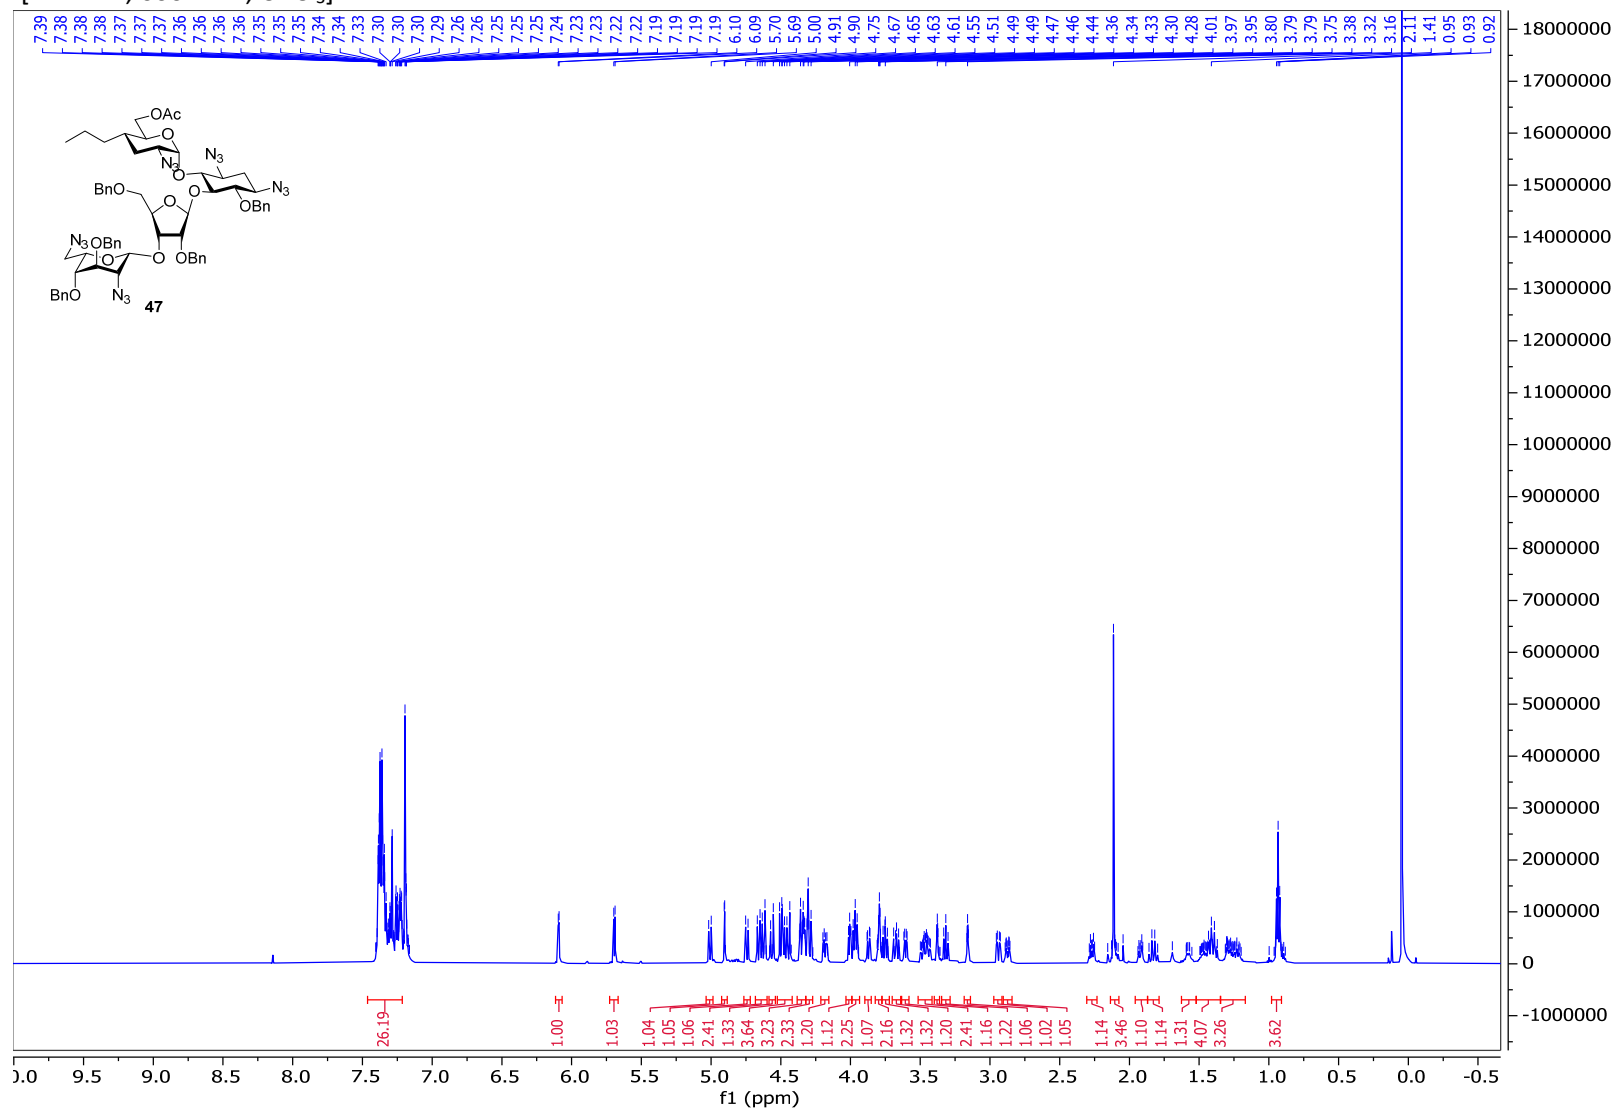

**1,3,2',3',4',2''',6'''-Heptadeoxy-4'-propyl-6'-acetyl-1,3,2',2''',6'''-pentaazido-6,2'',5'',3''',4'''-penta-O-benzyl paromomycin (47)**

[<sup>13</sup>C-NMR, 151 MHz, CDCl<sub>3</sub>]

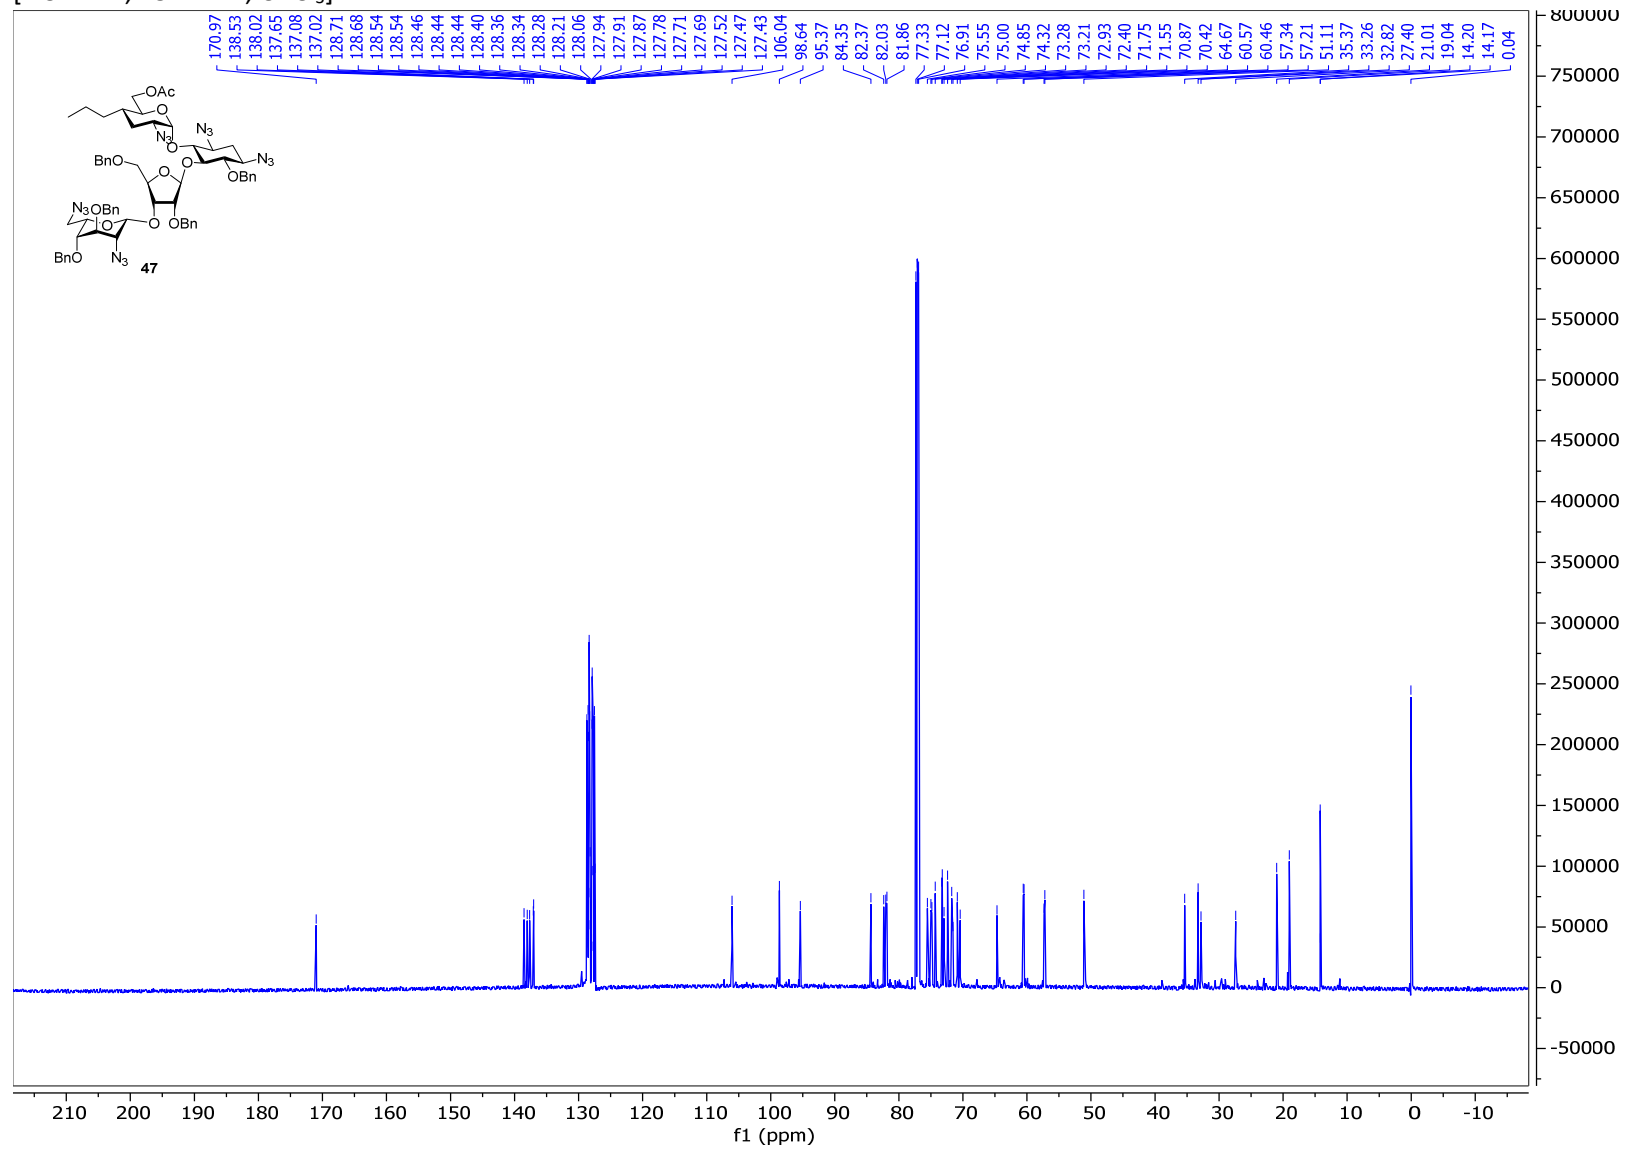

**1,3,2',3',4',2''',6'''-Heptadeoxy-4'-propyl-6'-acetyl-1,3,2',2''',6'''-pentaazido-6,2'',5'',3''',4'''-penta-O-benzyl paromomycin (47)**

[<sup>1</sup>H, <sup>1</sup>H COSY, 600 MHz, CDCl<sub>3</sub>]

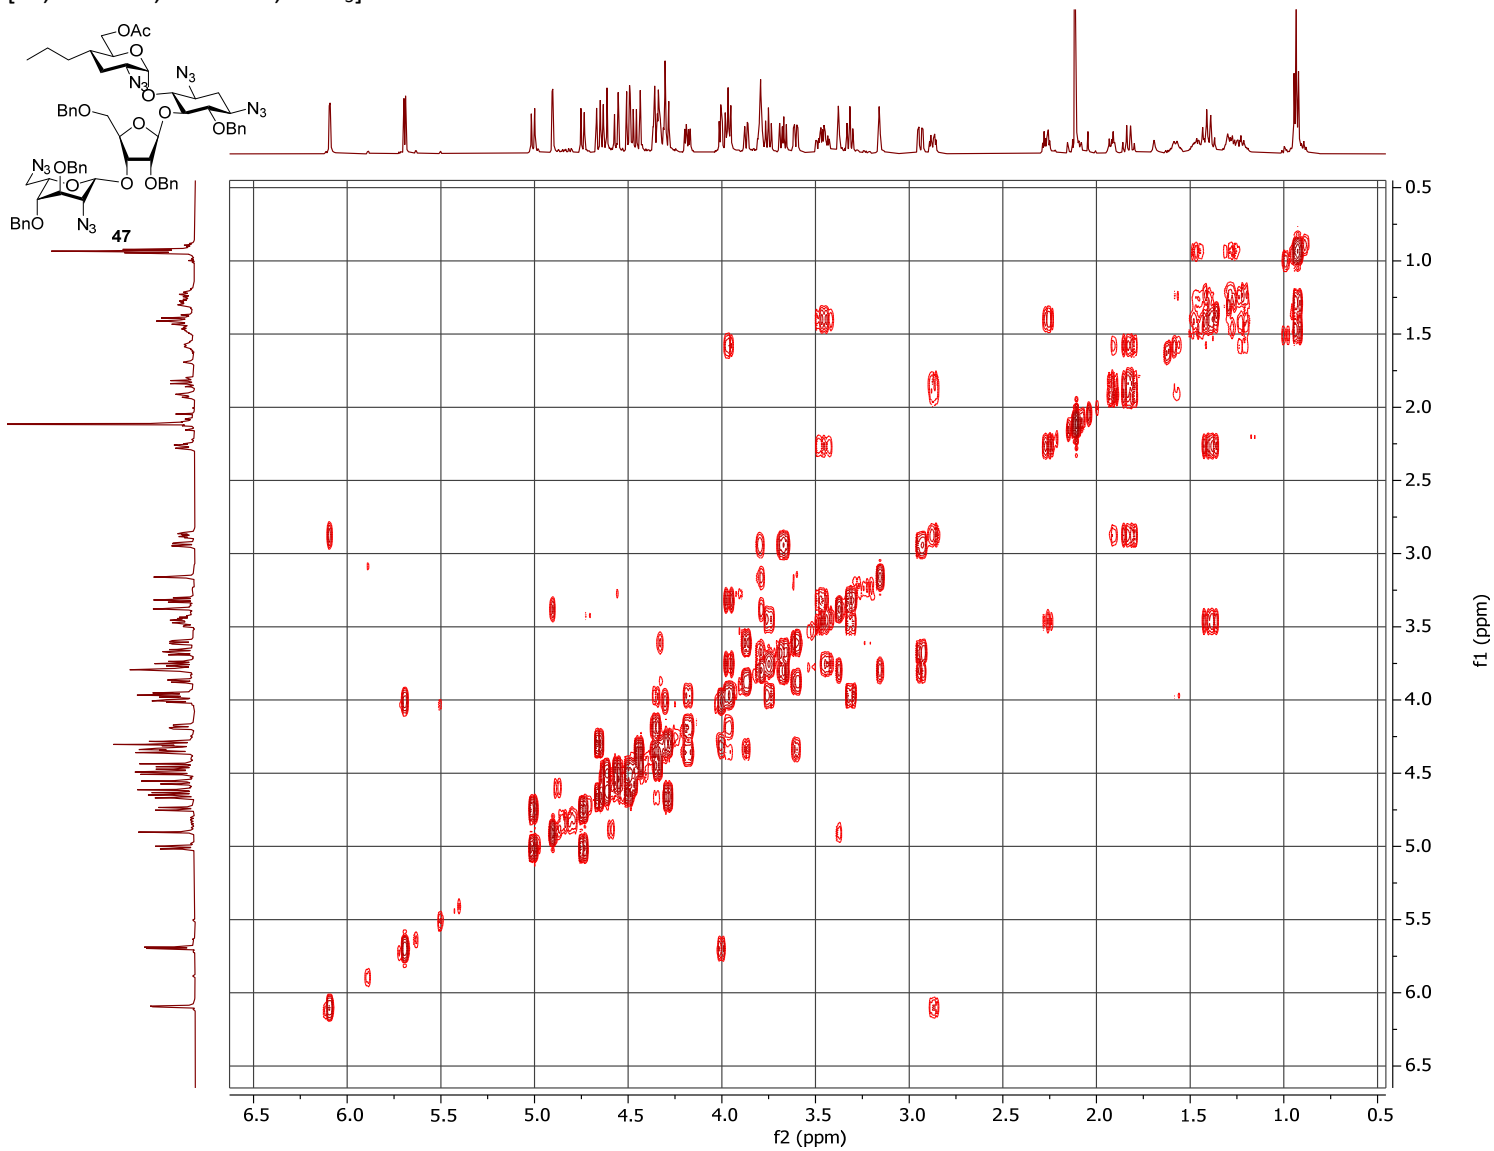

**1,3,2',3',4',2''',6'''-Heptadeoxy-4'-propyl-6'-acetyl-1,3,2',2''',6'''-pentaazido-6,2'',5'',3''',4'''-penta-O-benzyl paromomycin (47)**

[<sup>1</sup>H, <sup>13</sup>C HSQC, 600 MHz, 151 MHz, CDCl<sub>3</sub>]

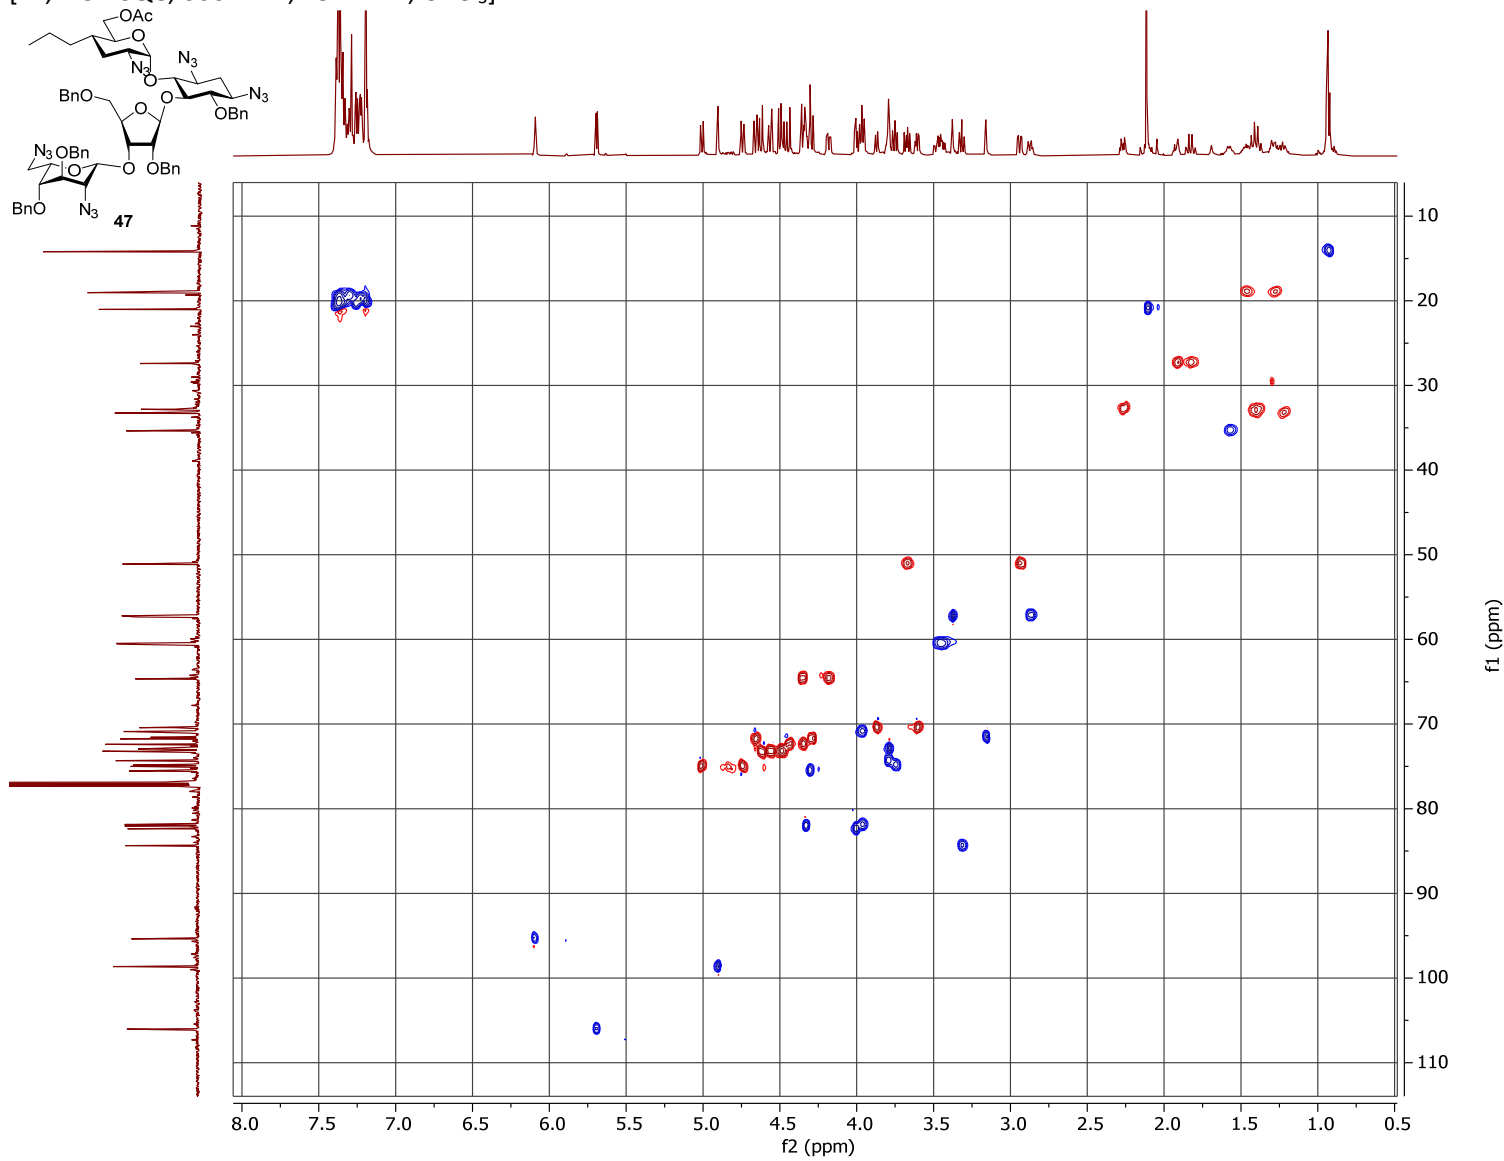

**1,3,2',3',4',2''',6'''-Heptadeoxy-4'-propyl-6'-acetyl-1,3,2',2''',6'''-pentaazido-6,2'',5'',3''',4'''-penta-O-benzyl paromomycin (47)**

[<sup>1</sup>H, <sup>13</sup>C HMBC, 600 MHz, 151 MHz, CDCl<sub>3</sub>]

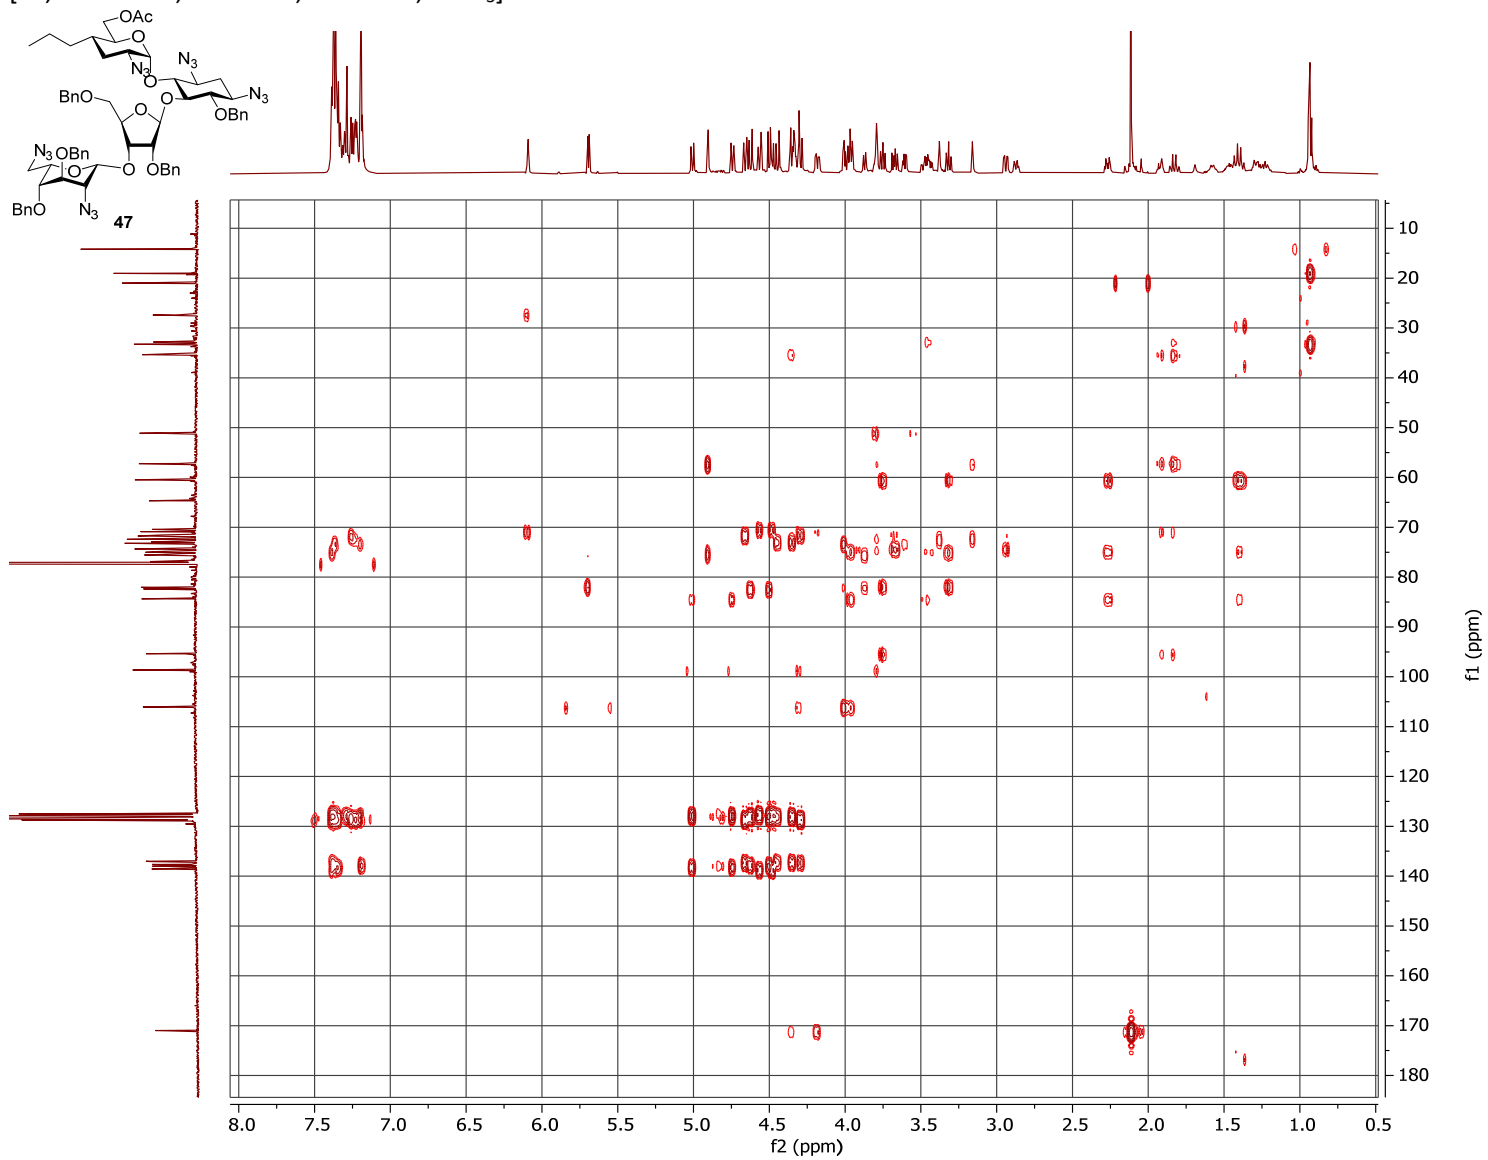

**1,3,2',3',4',2''',6'''-Heptadeoxy-4'-propyl-6'-acetyl-1,3,2',2''',6'''-pentaazido-6,2'',5'',3''',4'''-penta-O-benzyl paromomycin (47)**

D:\March 2021\VAS-510-114.raw  
RT : 0.00-1.02

3/9/2021 10:59:49 AM

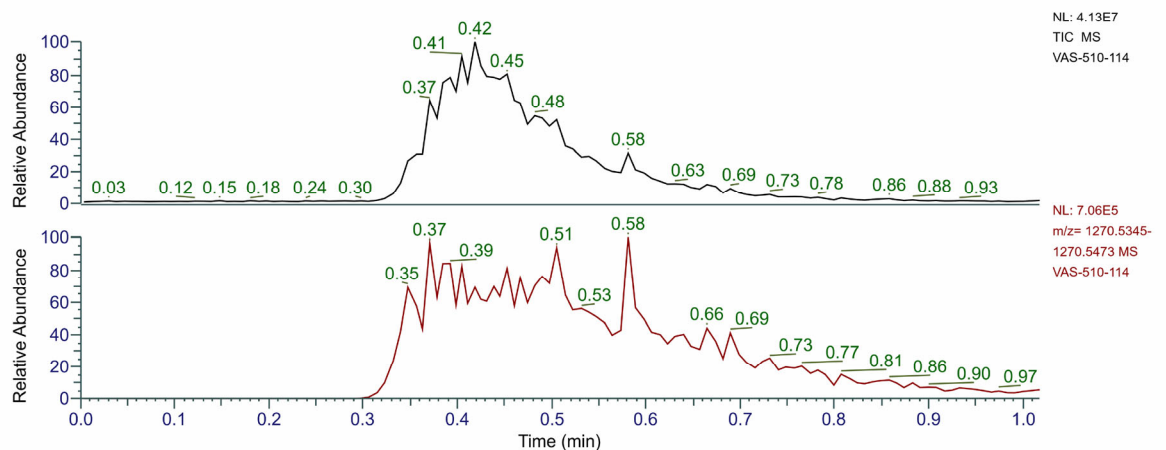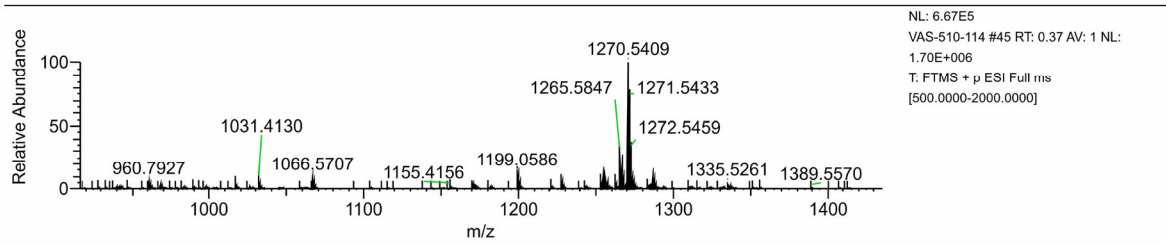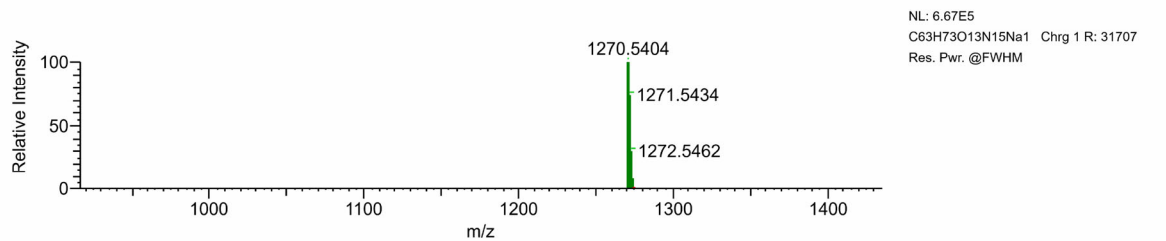

| Peak Mass | Delta [ppm] | Display Formula                                                                  | Theo. mass | MSMS Matched Fragments |
|-----------|-------------|----------------------------------------------------------------------------------|------------|------------------------|
| 1270.5409 | 0.35        | C <sub>63</sub> H <sub>73</sub> O <sub>13</sub> N <sub>15</sub> <sup>23</sup> Na | 1270.54045 | (Collection)           |

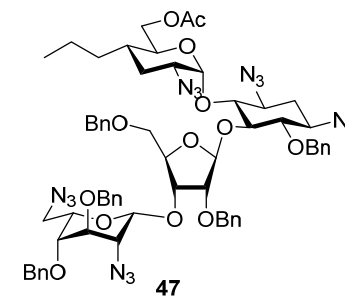

### 3',4'-Dideoxy-4'-propyl paromomycin pentaacetate (14)

[<sup>1</sup>H-NMR, 600 MHz, D<sub>2</sub>O]

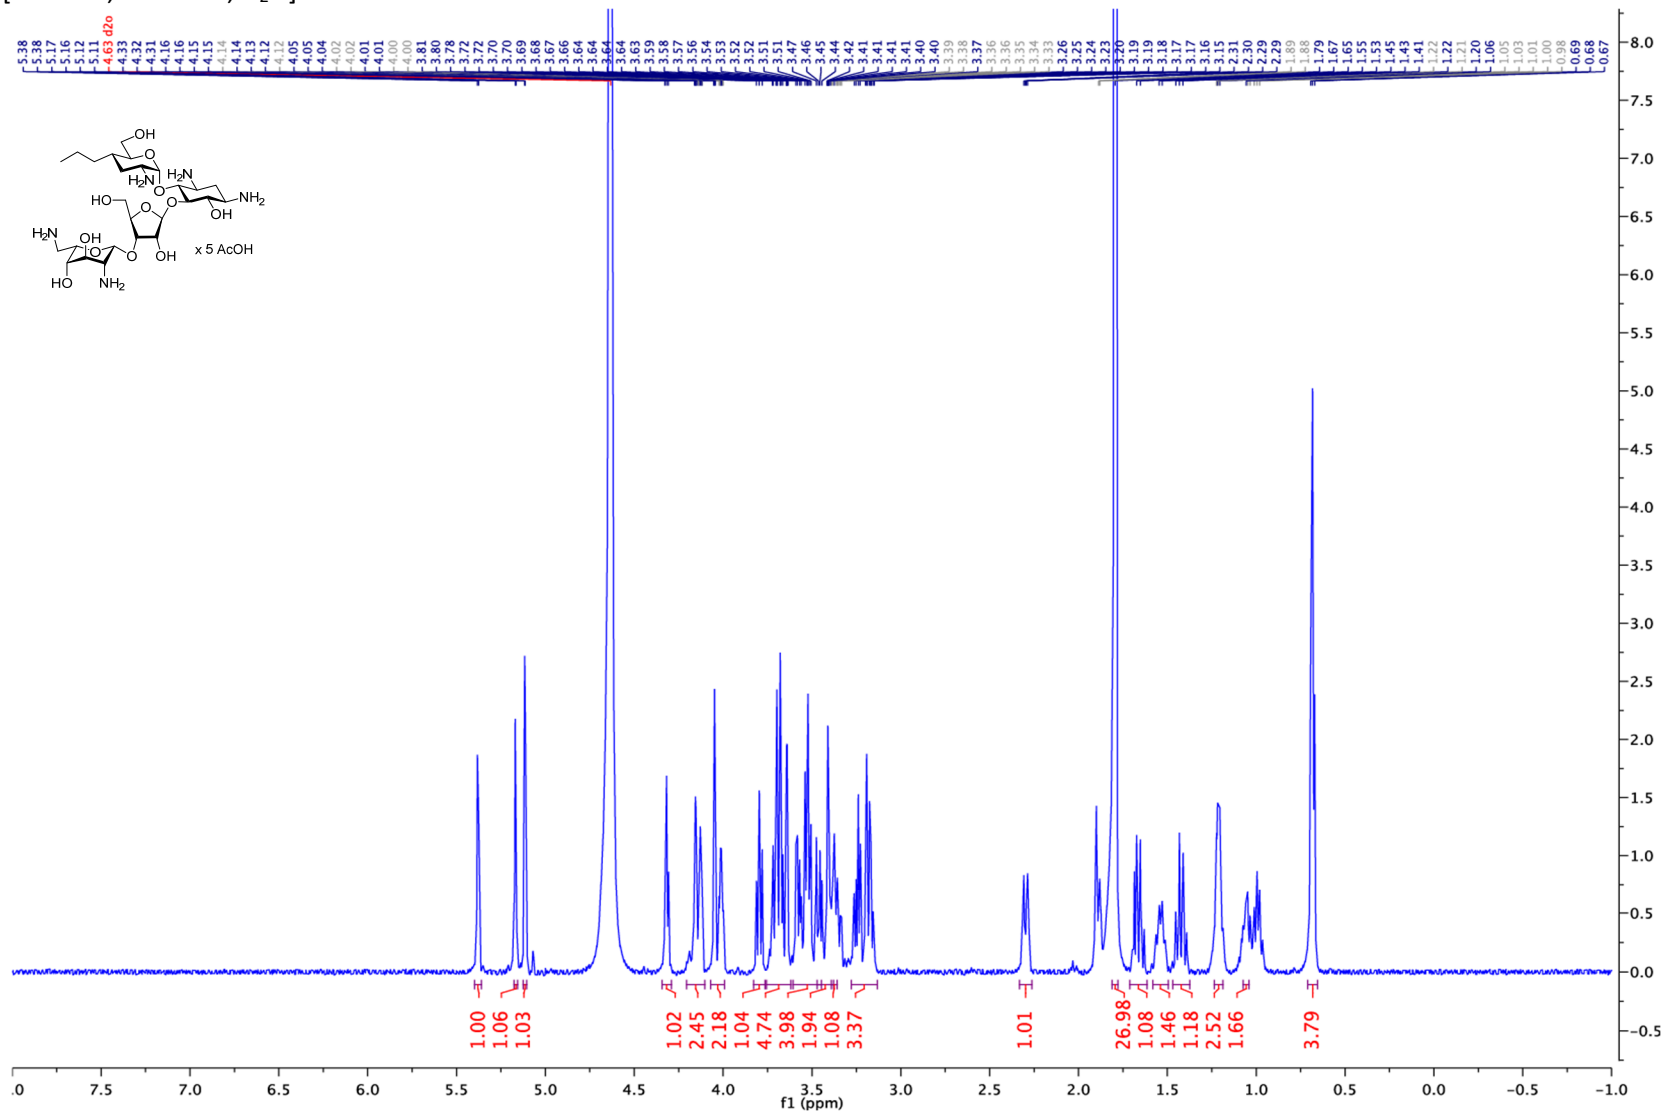

### 3',4'-Dideoxy-4'-propyl paromomycin pentaacetate (14)

[<sup>13</sup>C-NMR, 151 MHz, D<sub>2</sub>O]

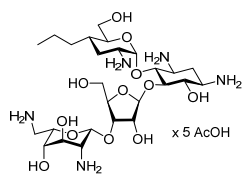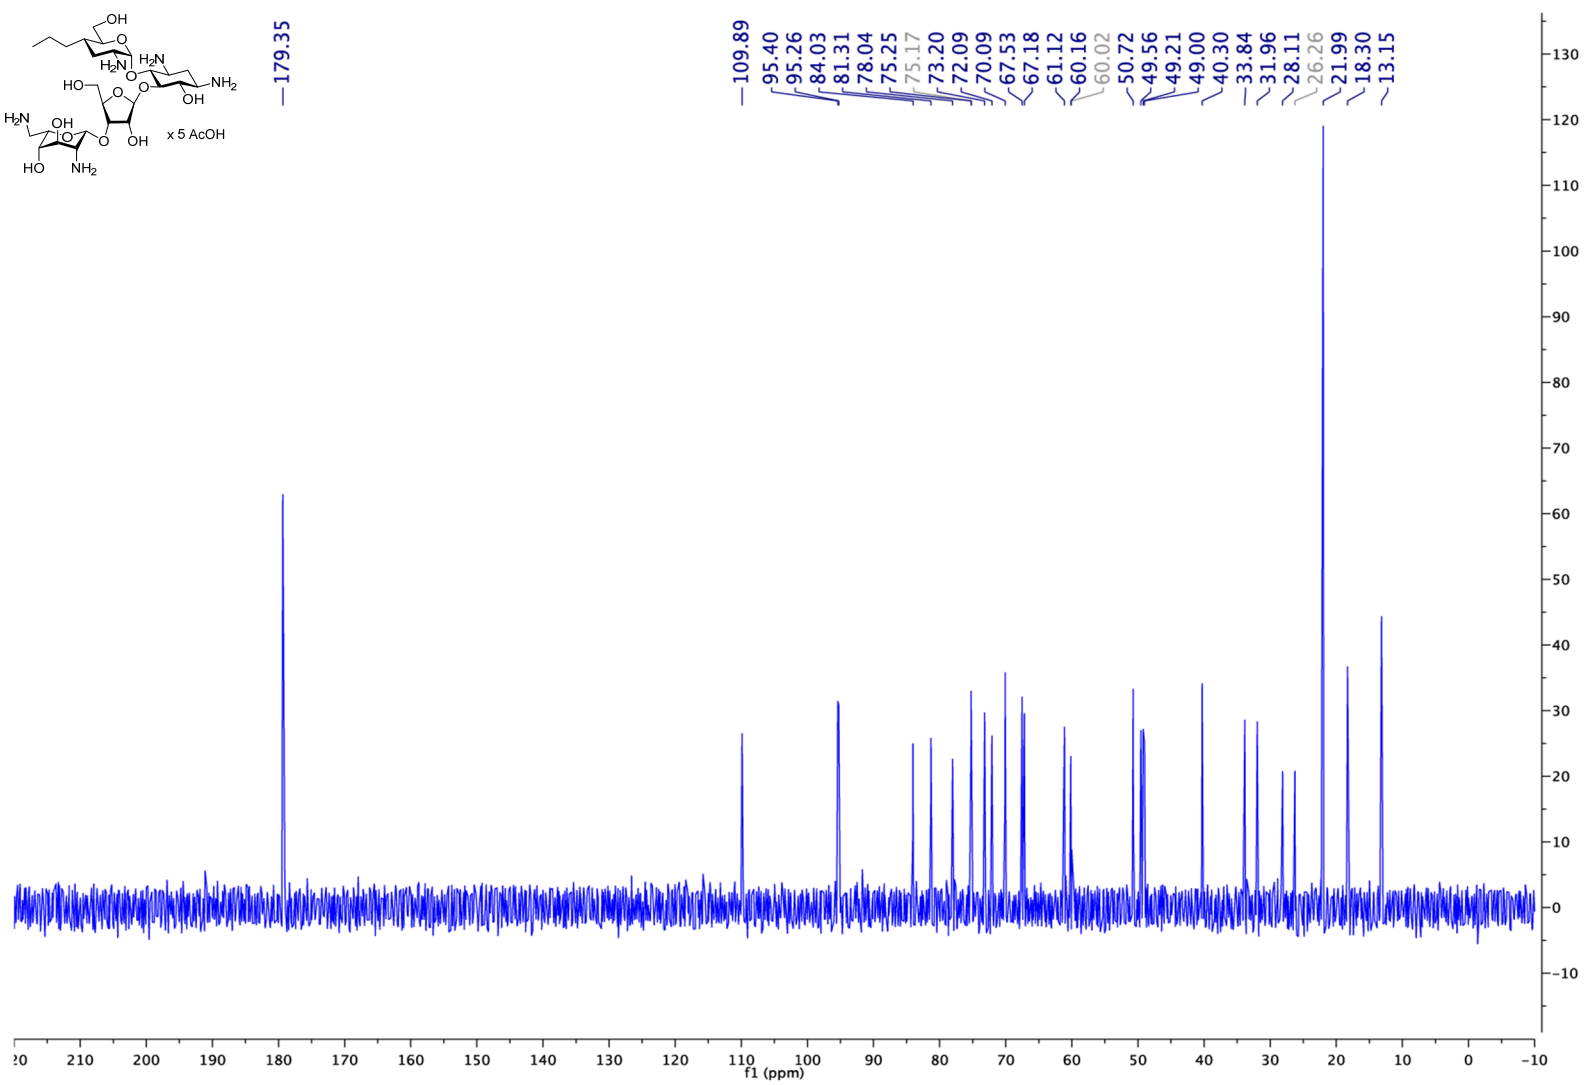



**3',4'-Dideoxy-4'-propyl paromomycin pentaacetate (14)**

[<sup>1</sup>H, <sup>1</sup>H COSY, 600 MHz, CDCl<sub>3</sub>]

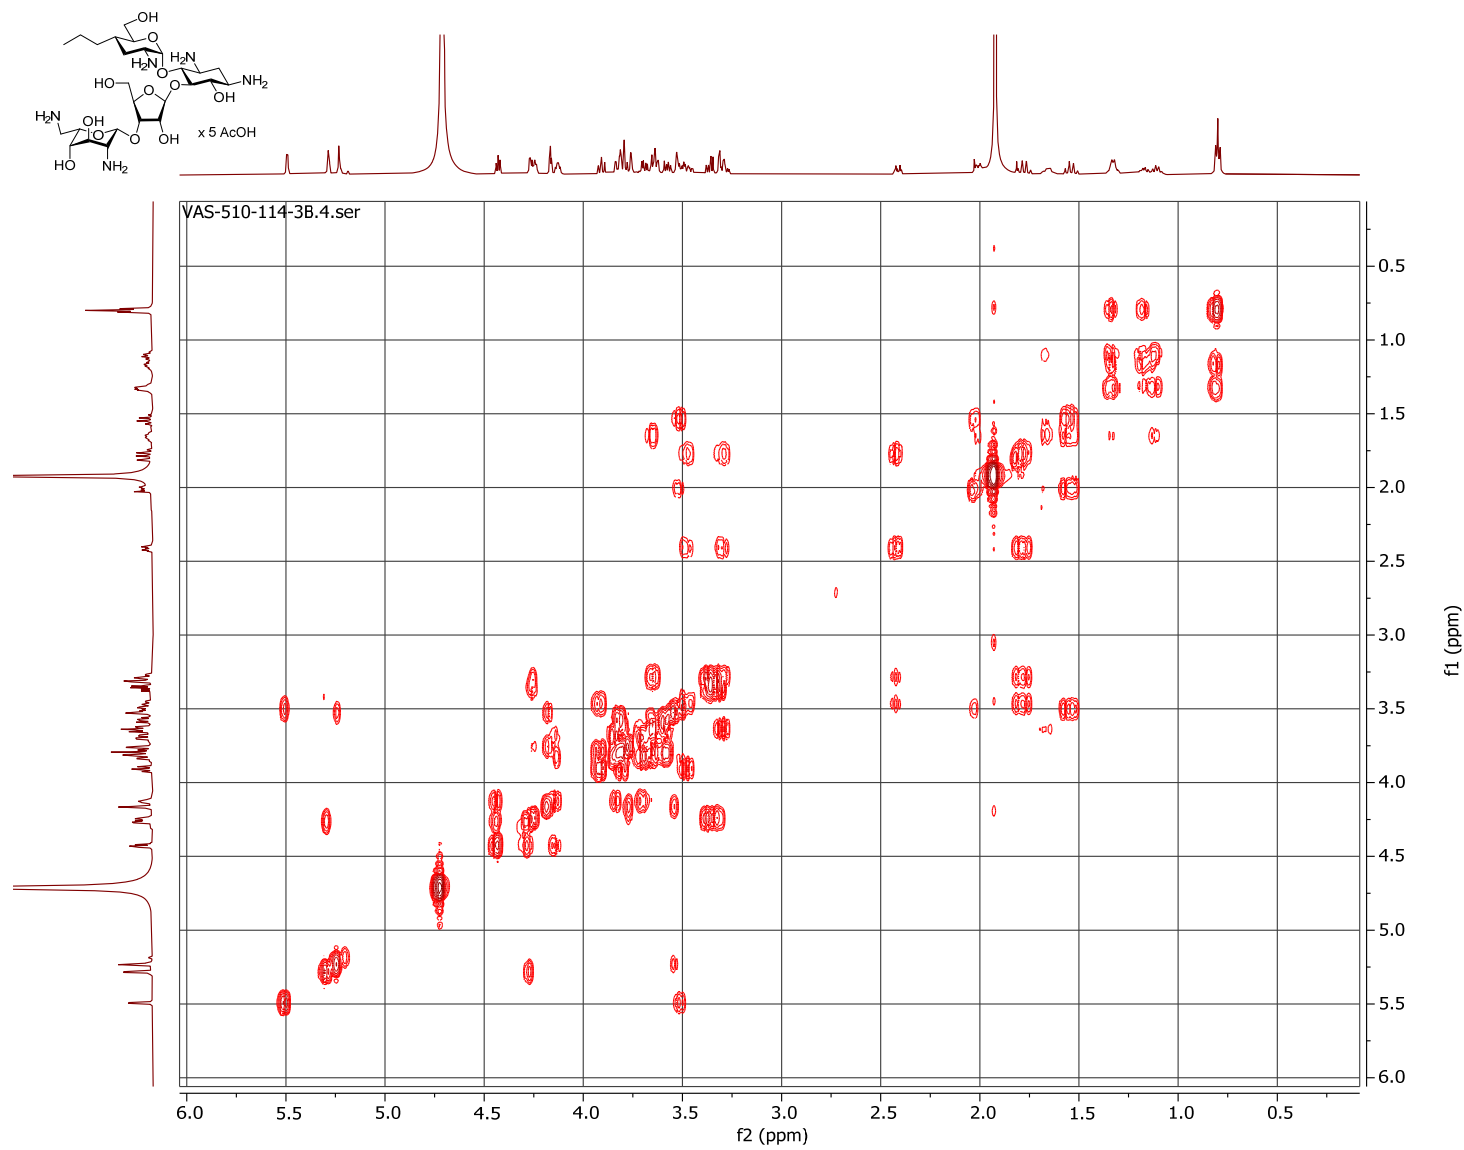

### 3',4'-Dideoxy-4'-propyl paromomycin pentaacetate (14)

[<sup>1</sup>H, <sup>13</sup>C HSQC, 600 MHz, 151 MHz, CDCl<sub>3</sub>]

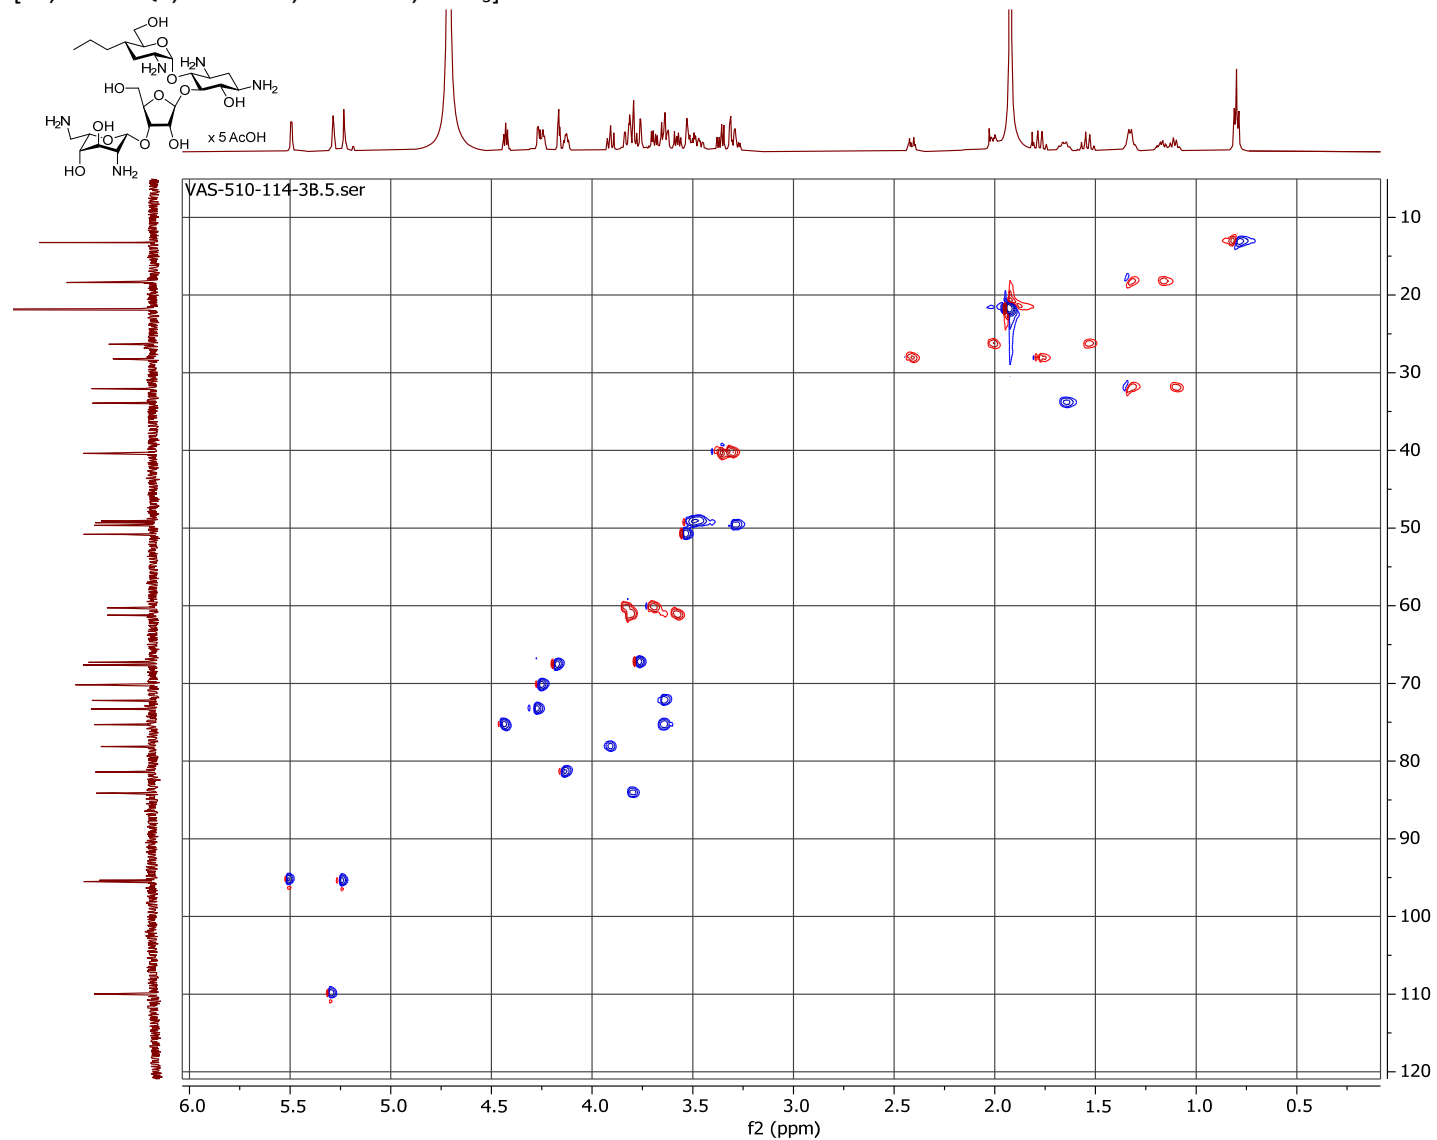

**3',4'-Dideoxy-4'-propyl paromomycin pentaacetate (14)**

[ $^1\text{H}$ ,  $^{13}\text{C}$  HSQC, 600 MHz, 151 MHz,  $\text{CDCl}_3$ ]

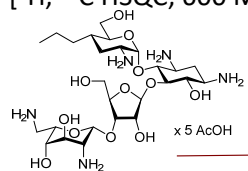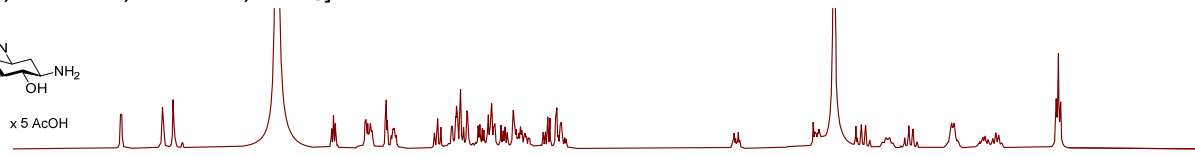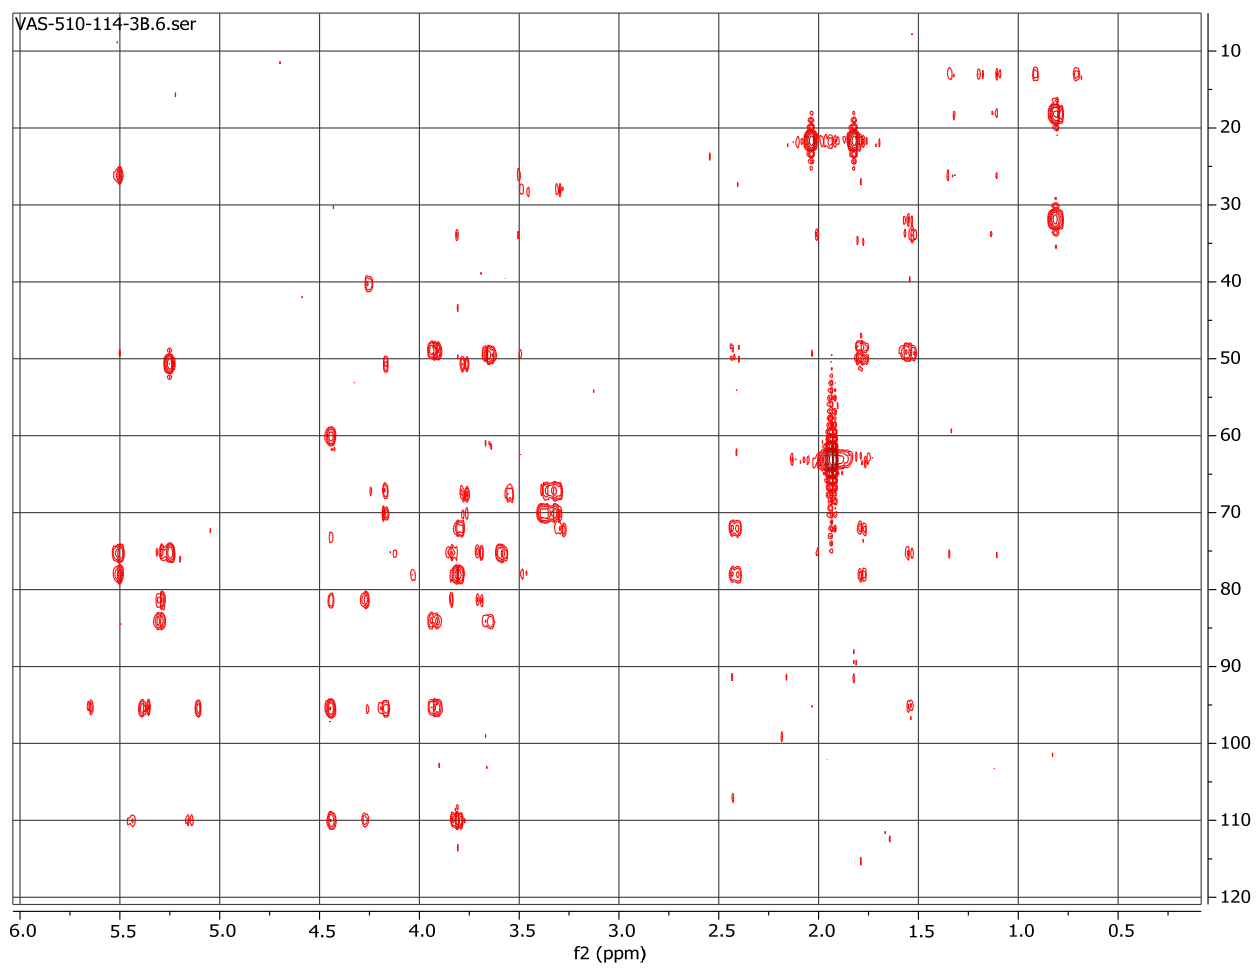

### 3',4'-Dideoxy-4'-propyl paromomycin pentaacetate (14)

D:\January 2021\VAS-510-Dep2B.raw

1/29/2021 3:09:57 PM

RT :0.00-1.01

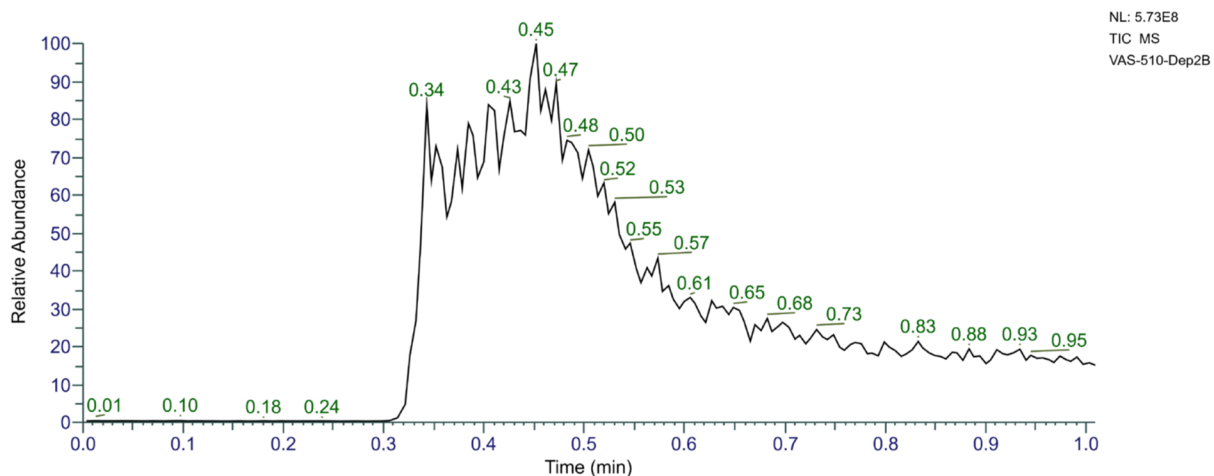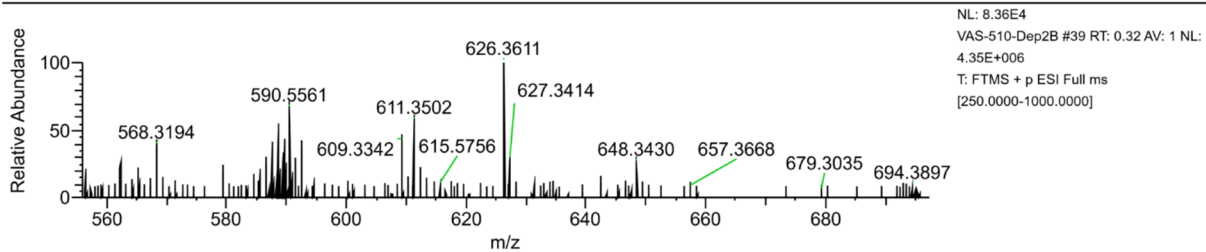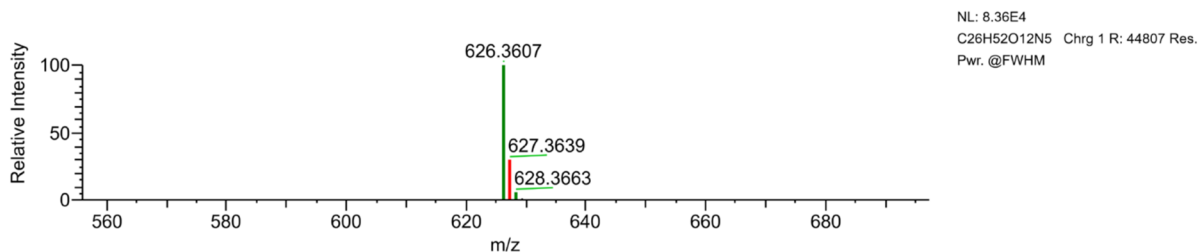

| Peak Mass | Delta [ppm] | Display Formula                                                | Theo. mass | MSMS Matched Fragments |
|-----------|-------------|----------------------------------------------------------------|------------|------------------------|
| 626.3611  | 0.71        | C <sub>26</sub> H <sub>52</sub> O <sub>12</sub> N <sub>5</sub> | 626.36070  | (Collection)           |

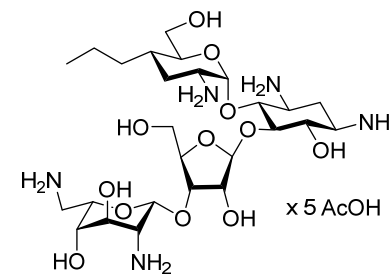

# 4',6',5''-Trideoxy-6',5''-[bis-*N*-(2-hydroxyethyl)]-4'-propyl paromomycin heptaacetate (15)

[<sup>1</sup>H-NMR, 600 MHz, D<sub>2</sub>O]

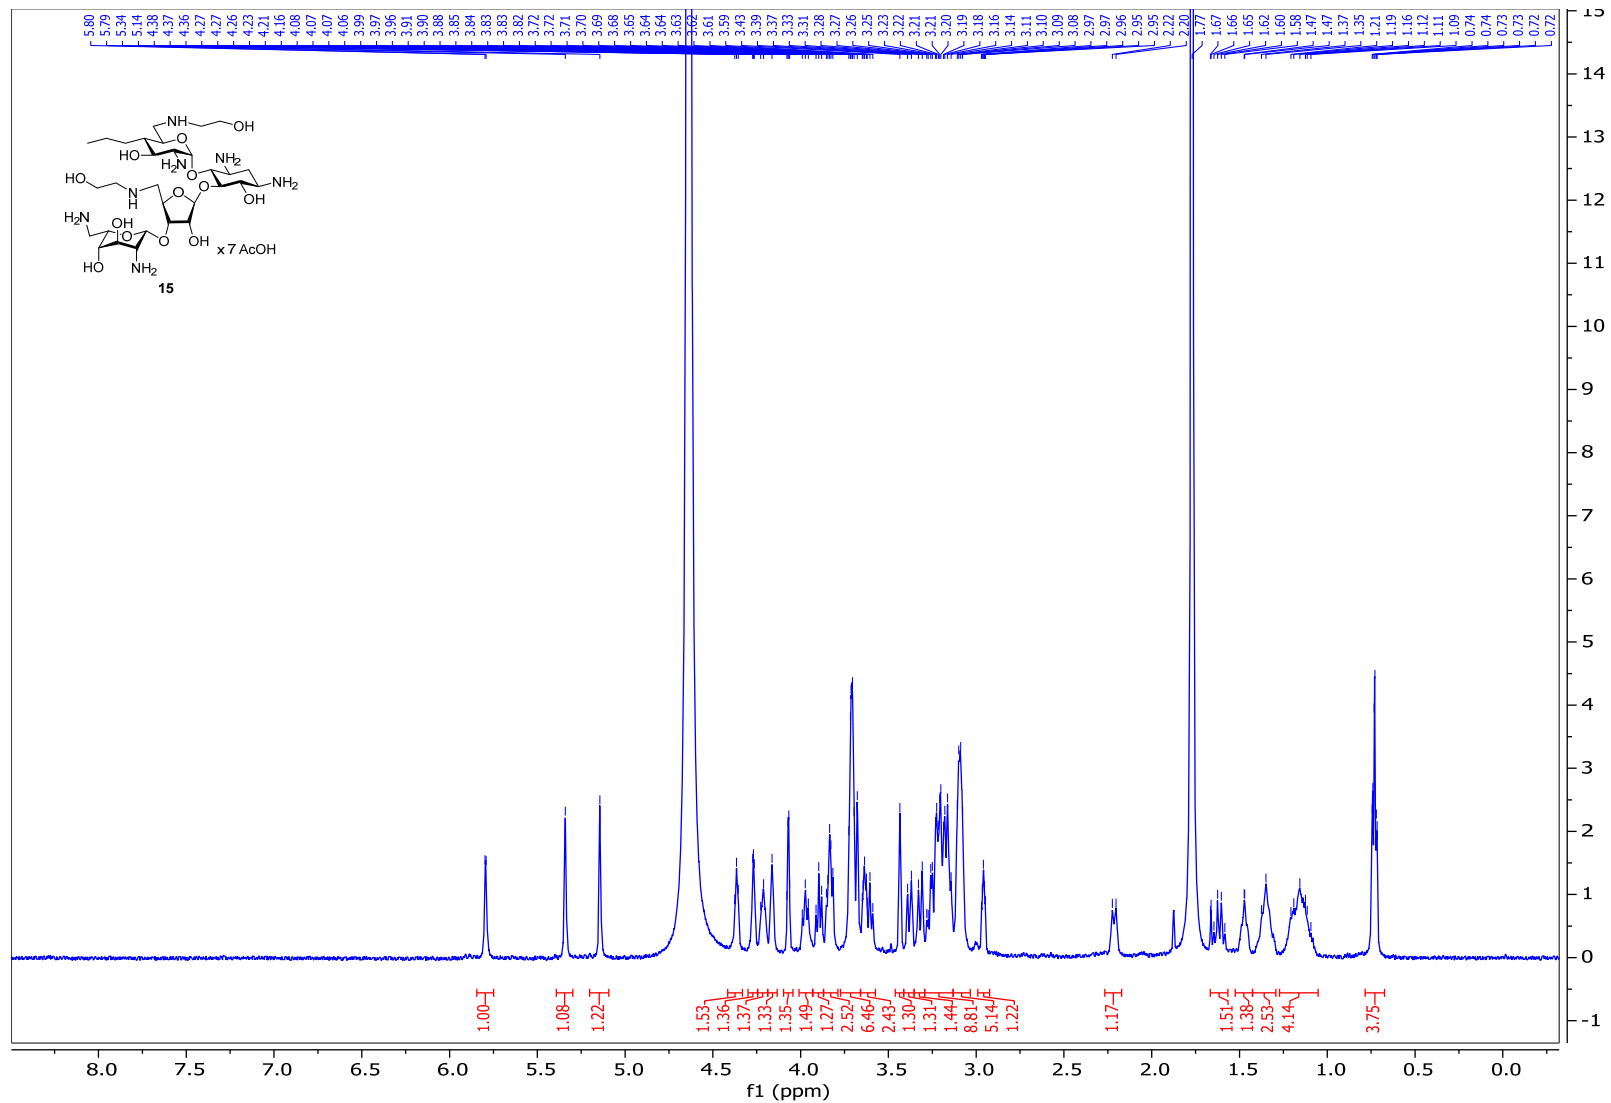

**4',6',5''-Trideoxy-6',5''-[bis-*N*-(2-hydroxyethyl)]-4'-propyl paromomycin heptaacetate (15)**

[<sup>13</sup>C-NMR, 151 MHz, D<sub>2</sub>O]

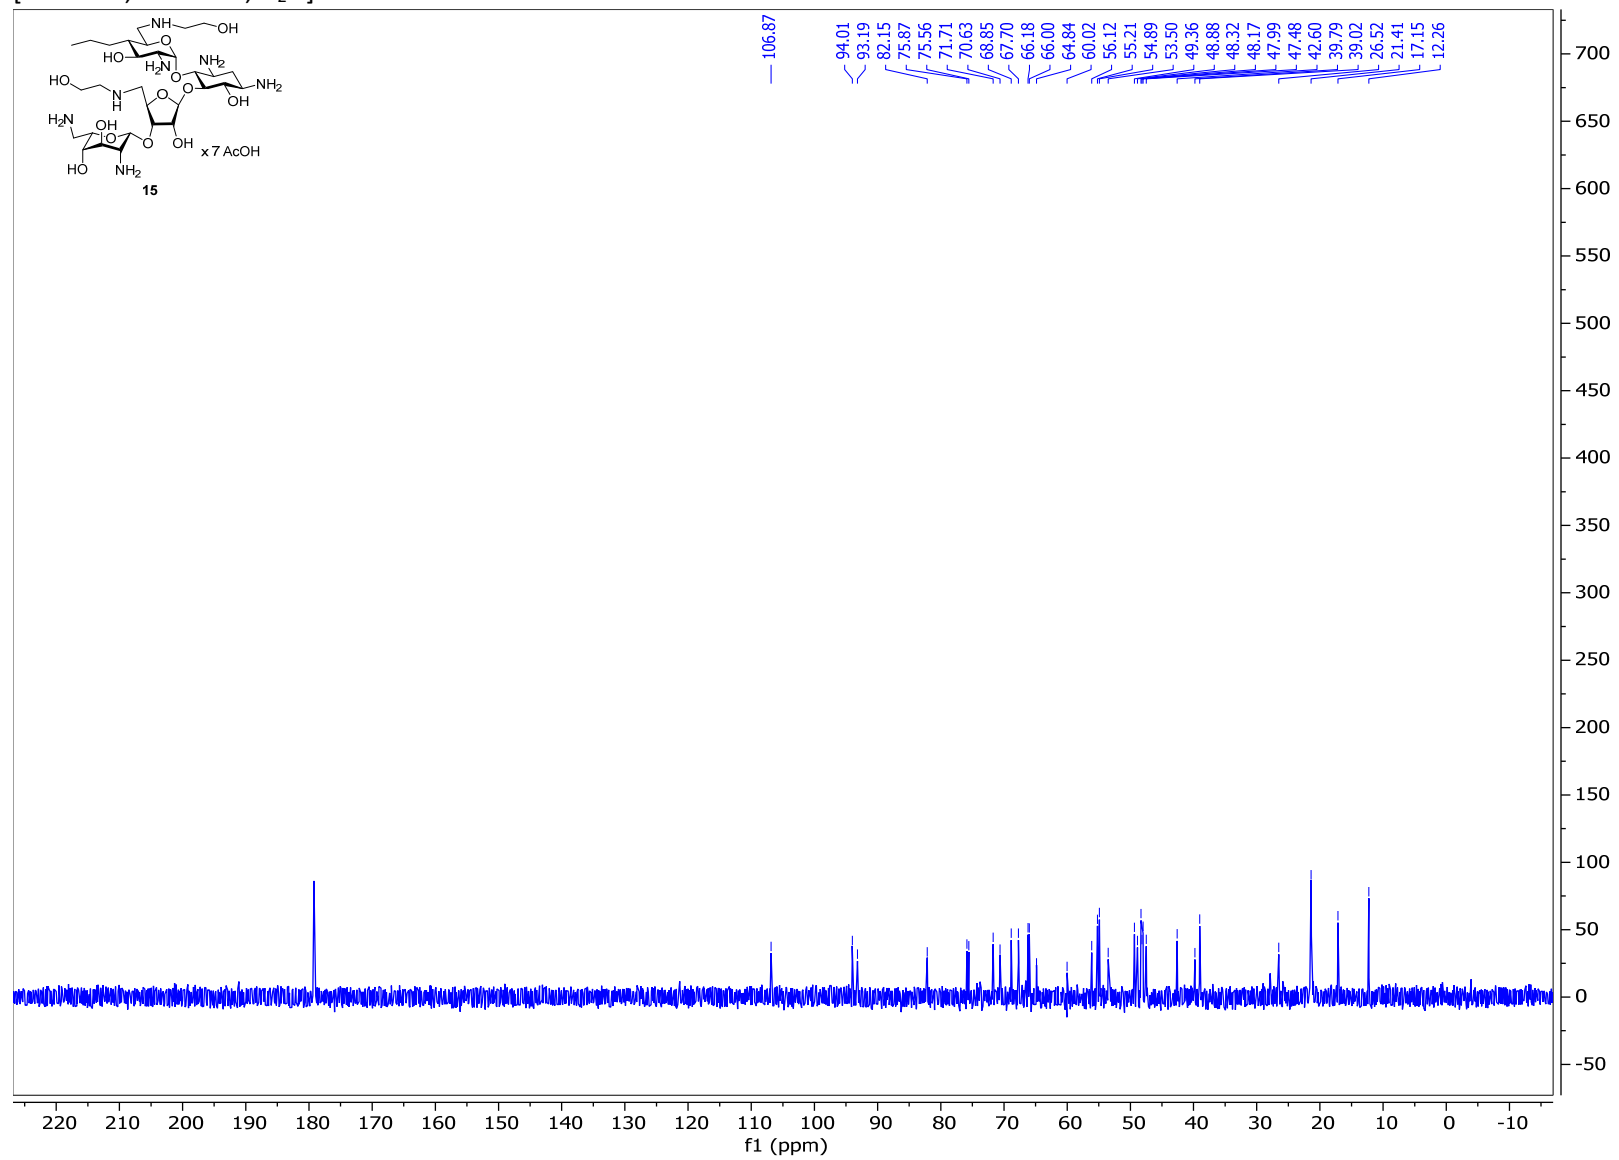

**4',6',5''-Trideoxy-6',5''-[bis-*N*-(2-hydroxyethyl)]-4'-propyl paromomycin heptaacetate (15)**

[<sup>1</sup>H, <sup>1</sup>H COSY, 600 MHz, CDCl<sub>3</sub>]

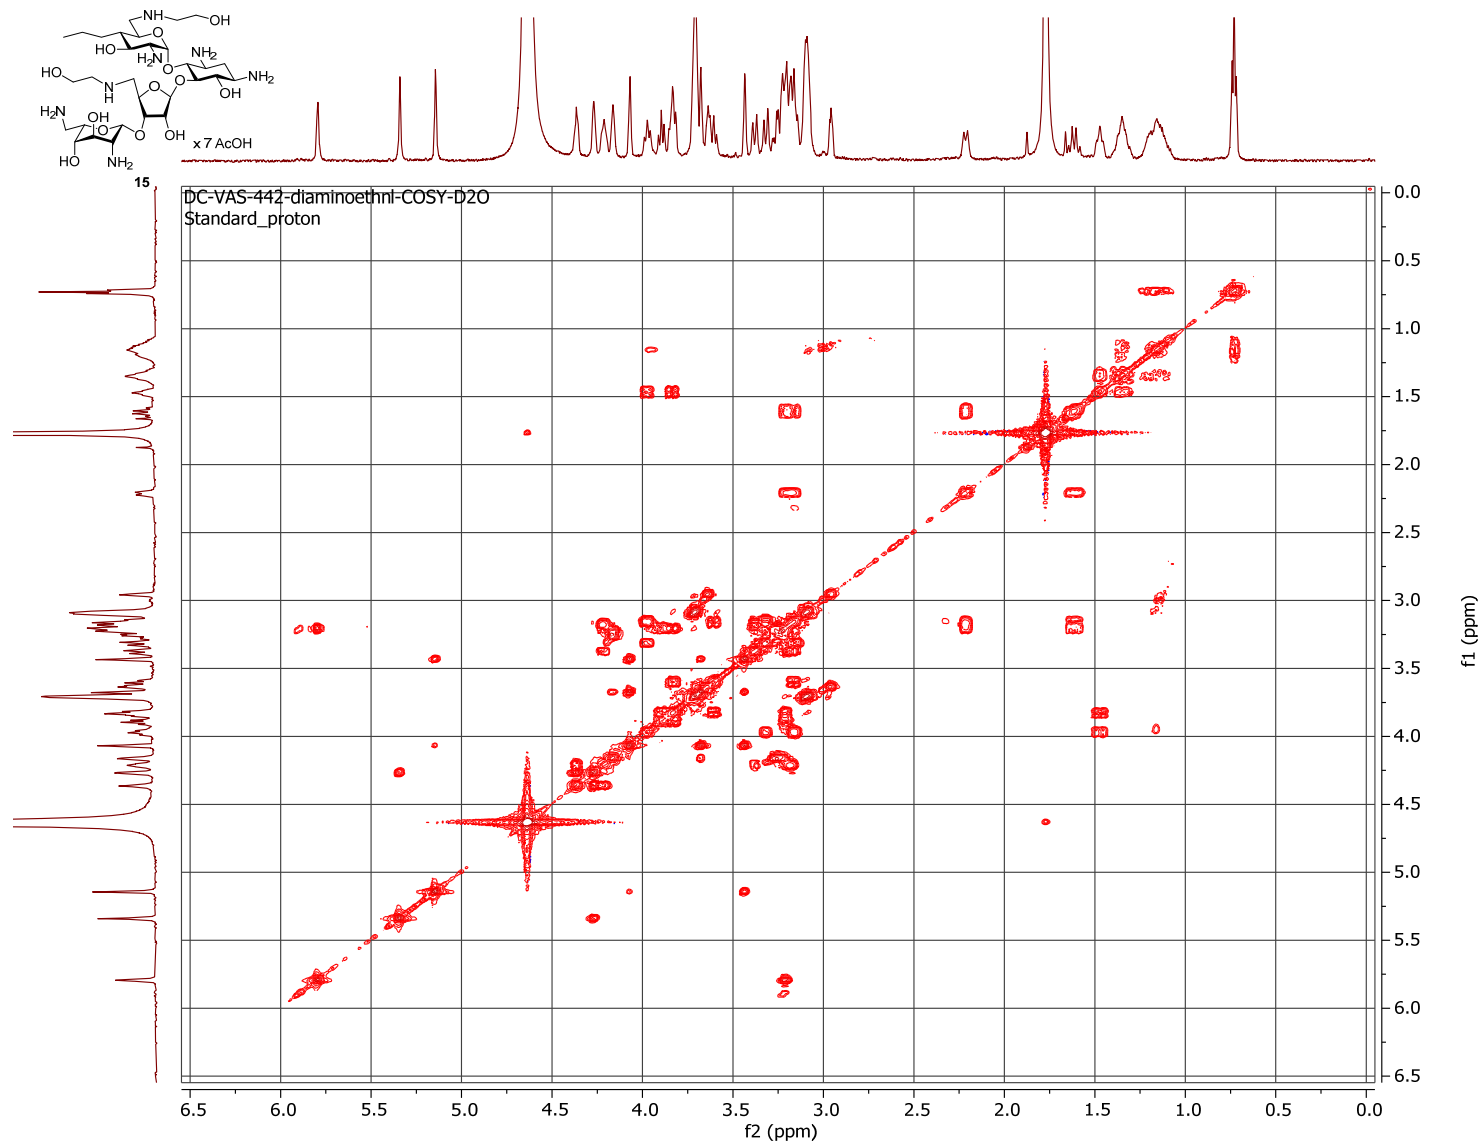

**4',6',5''-Trideoxy-6',5''-[bis-N-(2-hydroxyethyl)]-4'-propyl paromomycin heptaacetate (15)**

[<sup>1</sup>H, <sup>13</sup>C HSQC, 600 MHz, 151 MHz, CDCl<sub>3</sub>]

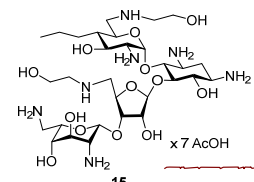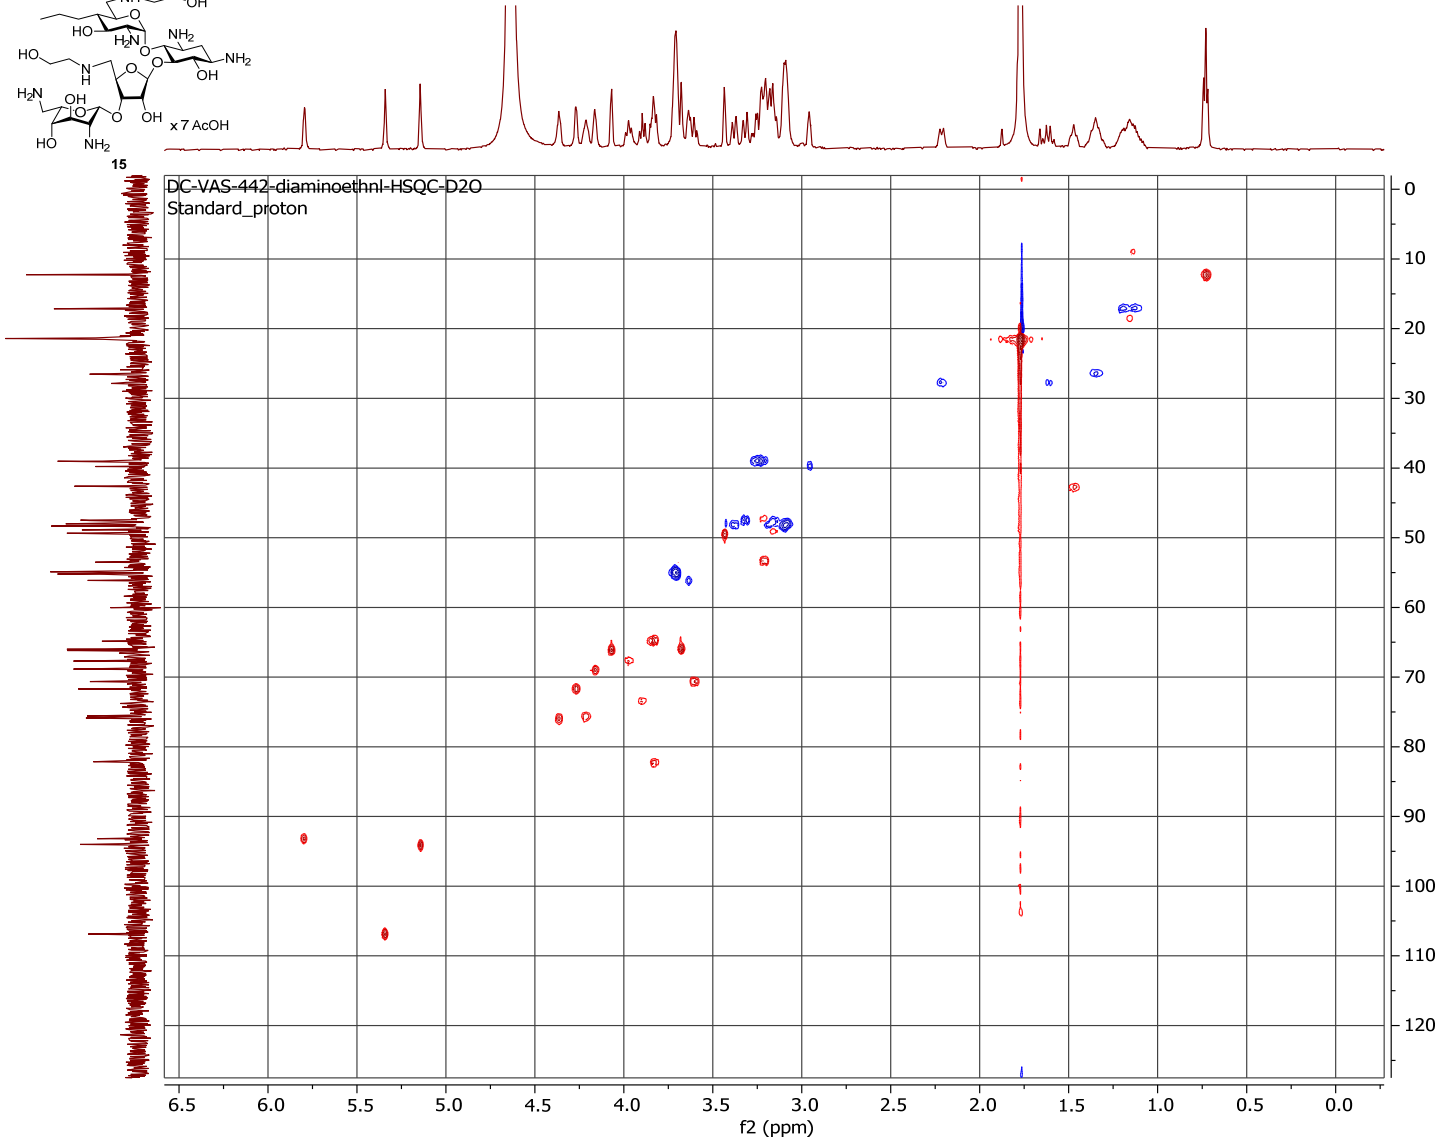



**4',6',5''-Trideoxy-6',5''-[bis-*N*-(2-hydroxyethyl)]-4'-propyl paromomycin heptaacetate (15)**

[<sup>1</sup>H, <sup>13</sup>C HSQC, 600 MHz, 151 MHz, CDCl<sub>3</sub>]

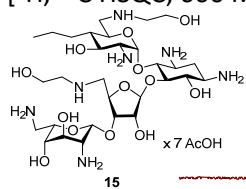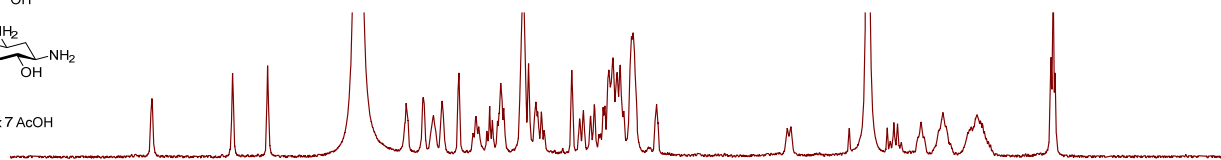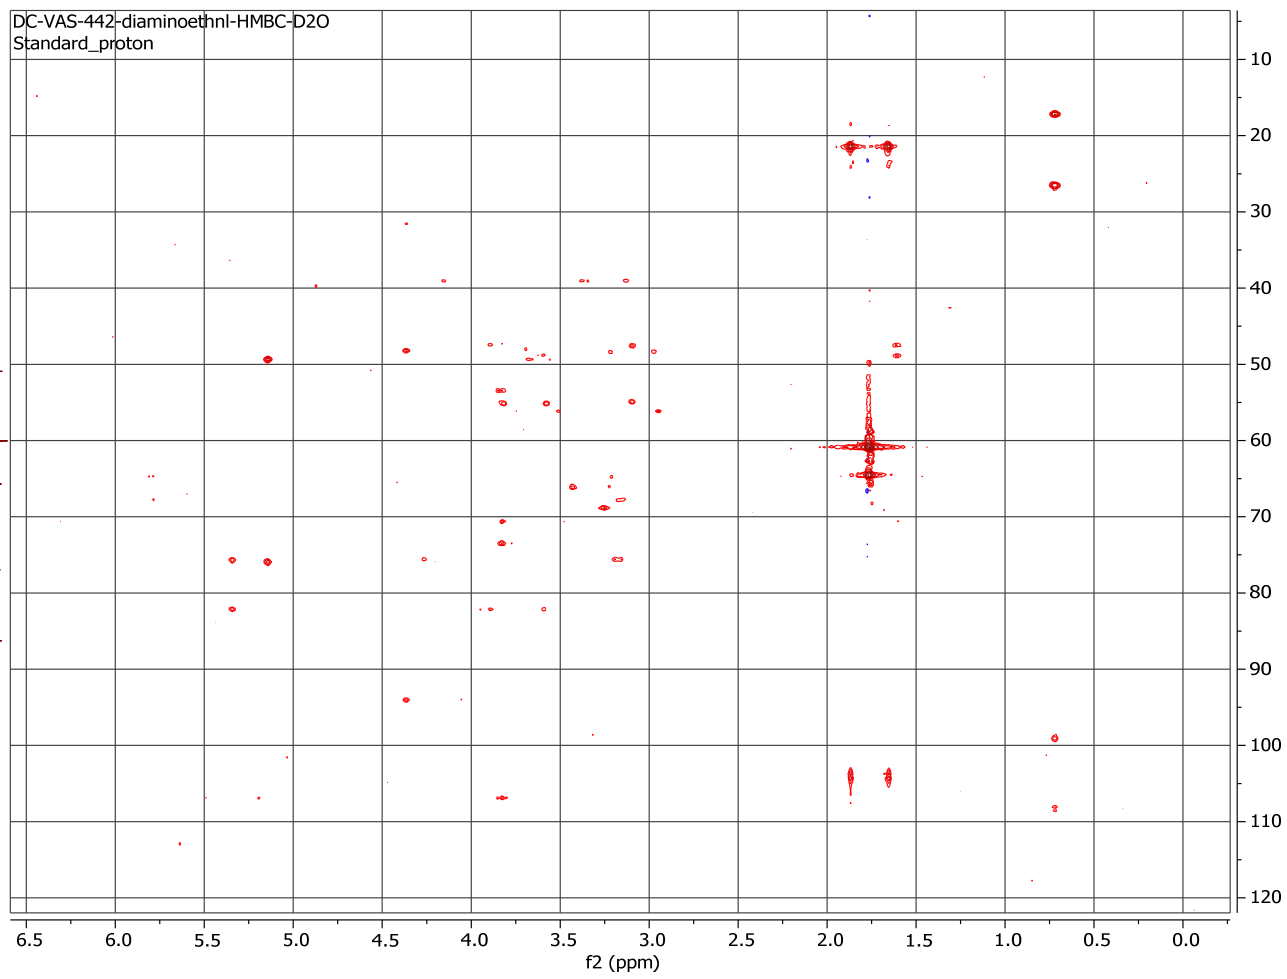

# 4',6',5''-Trideoxy-6',5''-[bis-N-(2-hydroxyethyl)]-4'-propyl paromomycin heptaacetate (15)

## Elemental Composition Report

### Single Mass Analysis

Tolerance = 5.0 PPM / DBE: min = -1.5, max = 50.0

Element prediction: Off

Number of isotope peaks used for i-FIT = 3

Monoisotopic Mass, Even Electron Ions

4 formula(e) evaluated with 1 results within limits (up to 50 closest results for each mass)

Elements Used:

C: 29-31 H: 59-62 N: 5-8 O: 12-14 Na: 0-1

vas-diethanolamin-final

2017\_0422\_24 11 (0.213)

LCT Premier  
1: TOF MS ES+  
1.27e+003

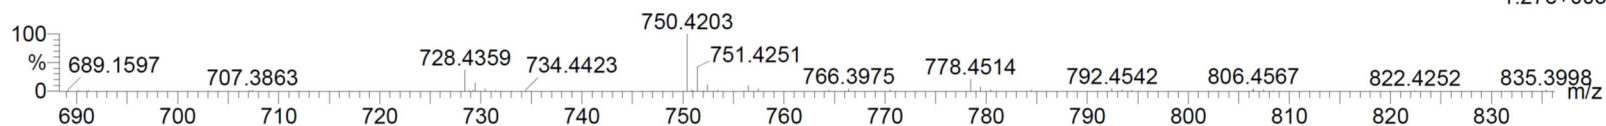

Minimum: -1.5  
Maximum: 5.0 5.0 50.0

| Mass     | Calc. Mass | mDa  | PPM  | DBE | i-FIT | i-FIT (Norm) | Formula           |
|----------|------------|------|------|-----|-------|--------------|-------------------|
| 750.4203 | 750.4225   | -2.2 | -2.9 | 3.5 | 26.2  | 0.0          | C30 H61 N7 O13 Na |

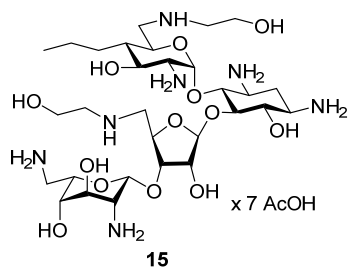

Supplement: NIHMS1713749-supplement-supporting_information.pdf [file NIHMS1713749-supplement-supporting_information.pdf]
